# Supplementary material for: Hi-TARGET: A fast, efficient and versatile CRISPR type I-B genome editing tool for the thermophilic acetogen Thermoanaerobacter kivui
Source: Research Square preprint supplement (doi:10.21203/rs.3.rs-5676099/v1), 2025-01-09
Supplement: Supplementary file 1 [file b59a5984acbea5c6d0a67751.xlsx]

## Sheet: Overview
Additional File 1	Hi-TARGET: A highly efficient, Thermoanaerobacter, CRISPR Type I-B-based, genome editing tool for the thermophilic acetogen Thermoanaerobacter kivui
Table S1	CRISRP Cas loci in T. kivui found from CRISPRCasFinder and sequence of Type I-B array promoter and selected direct repeat.
Table S2	CRISPR Cas Target results of spacers found in T. kivui blasted against MGE databases.
Table S3	List of oligonucleotides used in this study.
Table S4	Transcriptomics from heterotrophic batch cultivation of wildtype and ΔrexA.
Table S5	Motifs identified in T. kivui non-coding regions by blasting the Thermoanaerobacterales motif 5'-TTGTTAANNNNTTAACAA-3' in Geneious.
Table S6	Mutations identified with whole genome sequencing in wildtype and polC (C629Y) at transfer 1 and transfer 30.
	0

## Sheet: Table S1
Table S1. CRISRP Cas loci in T. kivui found from CRISPRCasFinder and sequence of Type I-B array promoter and selected direct repeat
Element	CRISPR ID / Cas Type	Start	End	Spacer/ Gene	Repeat consensus / cas genes	Direction	Evidence level
Cas cluster	CP009170.1|CAS-TypeIII-C_1	1395051	1403246	6	Cas10_0_III-C_4, Cmr1_0_III-C_6, Cmr3_0_III-C_1, Cmr4_0_III-B_3, Cmr5_0_III-C_2, Cmr6_0_III-C_5
CRISPR	CP009170_4	1407972	1412526	68	GTTTCAATTCCTTATAGGTAGGCTAAAAAC	-	4
Cas cluster	CP009170.1|CAS-TypeIII-A_2	1662735	1669127	6	Cas10_0_III-A_6, Cas6_0_I-III_1, Csm2_0_III-A_5, Csm3_0_III-A_4, Csm4_0_III-A_3, Csm5_0_III-A_2
Cas cluster	CP009170.1|CAS-TypeIII-C_3	2075823	2082892	5	Cas10_0_III-C_4, Cmr3_0_III-C_1, Cmr4_0_III-B_3, Cmr5_1_III-C_2, Cmr6_0_III-C_5
CRISPR	CP009170_5	2268103	2273799	85	GTTTCAATCCCTCTTAGGTAGGCTAAAAAC	-	4
Cas cluster	CP009170.1|CAS-TypeI-B_5	2275637	2282494	5	Cas3_0_I_2, Cas4_0_I-II_1, Cas5_1_I-B_3, Cas7_2_I-B_4, Cas8a1_1_I-B_5
CRISPR	CP009170_6	2344710	2347139	36	CTTTCAATTCCAGTATGGTTGGATTAAATC	-	4
Cas cluster	CP009170.1|CAS-TypeI-B_4	2347377	2355164	8	Cas1_0_I-II-III_3, Cas2_0_I-II-III-V_2, Cas3_0_I_5, Cas4_0_I-II_4, Cas5_0_I-B_6, Cas6_0_I-III_1, Cas7_1_I-B_7, Cas8a1_0_I-B_8
Element	Sequence (5' - 3')
Native CRISPR promoter	ATATTTATTAATTTAATTTTTTGTCGACCTCTCCGGATGTAAGAATGCCAAGAGGTCGACGAAGAAAAACCCATATATAACGTTTTCATAATATCACAAAAATATAAATTTTATGTCGAGATGAATTTTTATGAATTTATGTTTGAGTATTTATTTTAGGATTTGTTATTGTAAAATAGCTTATTCTGTGGTAAAGTAAATTTAAAGAGCATTAGTATTATCATGCAGTTTTCATGG
Direct Repeat	CTTTCAATTCCAGTATGGTTGGATTAAATC

## Sheet: Table S2
Table S2. CRISPRTarget results of spacers found in T. kivui blasted against MGE databases.
#Spacer_ID	Spacer_index	Protospacer_seq_id	Protospacer_start	Protospacer_stop	Flank_3p(protospacer)	Flank_5p(protospacer)	Score	Protospacer_Strand	Reverse_complement_for_flank_3p(protospacer)	Spacer (5' to 3')	Protospacer (5' to 3')	Spacer_description	Link
spacer_2	spacer_2_2_1|1-37	IMGVR_UViG_3300009830_000019|3300009830|Ga0131845_100468	2273	2309	TGGTAAGC	TAAGCTGA	37	-	GCTTACCA	UCAAACAGAUCGCUUCAGCAUUUGGGAUAAAAAAUCA	TGATTTTTTATCCCAAATGCTGAAGCGATCTGTTTGA	spacer 2	https://img.jgi.doe.gov/cgi-bin/vr/main.cgi?section=ViralBrowse&page=uviginfo&uvig_id=IMGVR_UViG_3300009830_000019
spacer_2	spacer_2_2_1|1-37	IMGVR_UViG_3300034521_000063|3300034521|Ga0310137_005959	134	98	TGGTAAGC	TAAGCTGA	37	+	GCTTACCA	UCAAACAGAUCGCUUCAGCAUUUGGGAUAAAAAAUCA	TGATTTTTTATCCCAAATGCTGAAGCGATCTGTTTGA	spacer 2	https://img.jgi.doe.gov/cgi-bin/vr/main.cgi?section=ViralBrowse&page=uviginfo&uvig_id=IMGVR_UViG_3300034521_000063
spacer_7	spacer_7_7_1|1-37	IMGVR_UViG_3300028033_000028|3300028033|Ga0247720_101419	621	657	TGGTTCGA	ACAAAATA	33	-	TCGAACCA	AAGCUAACCAAAAAUUUGGCAAAAACAGCAUUCAUAA	TTATGAATGCTGTTTTTACCAAATTTTTGATTAGCTT	spacer 7	https://img.jgi.doe.gov/cgi-bin/vr/main.cgi?section=ViralBrowse&page=uviginfo&uvig_id=IMGVR_UViG_3300028033_000028
spacer_8	spacer_8_8_1|1-36	IMGVR_UViG_3300031260_000005|3300031260|Ga0325117_189610	154	119	GGGAGCTT	AAAAGCAG	30	+	AAGCTCCC	AUGUUUGUGUGAUAAAUGACCUUCUGGUAUACUCUU	AGGAGTATACCAGAAGGGCATTTATTACACAAACAT	spacer 8	https://img.jgi.doe.gov/cgi-bin/vr/main.cgi?section=ViralBrowse&page=uviginfo&uvig_id=IMGVR_UViG_3300031260_000005
spacer_34	spacer_34_34_1|1-37	IMGVR_UViG_3300026628_000026|3300026628|Ga0208296_100652	1116	1080	CGGTACAG	TGTACAAA	29	+	CTGTACCG	GGGAUGAUUCCAUAAUCUUUUUUUUCUUUCAGUGUGC	GCACGCTGAAAGAAAAAAAAGACTATGGTATCATTCC	spacer 34	https://img.jgi.doe.gov/cgi-bin/vr/main.cgi?section=ViralBrowse&page=uviginfo&uvig_id=IMGVR_UViG_3300026628_000026
spacer_34	spacer_34_34_1|1-37	IMGVR_UViG_3300006633_000003|3300006633|Ga0079285_100227	83	47	CGGTACAG	TGTACAAA	29	+	CTGTACCG	GGGAUGAUUCCAUAAUCUUUUUUUUCUUUCAGUGUGC	GCACGCTGAAAGAAAAAAAAGACTATGGTATCATTCC	spacer 34	https://img.jgi.doe.gov/cgi-bin/vr/main.cgi?section=ViralBrowse&page=uviginfo&uvig_id=IMGVR_UViG_3300006633_000003
spacer_34	spacer_34_34_1|1-37	IMGVR_UViG_3300042803_000001|3300042803|Ga0482165_00090	6678	6714	CGGTACAG	TGTACAAA	29	-	CTGTACCG	GGGAUGAUUCCAUAAUCUUUUUUUUCUUUCAGUGUGC	GCACGCTGAAAGAAAAAAAAGACTATGGTATCATTCC	spacer 34	https://img.jgi.doe.gov/cgi-bin/vr/main.cgi?section=ViralBrowse&page=uviginfo&uvig_id=IMGVR_UViG_3300042803_000001
spacer_2	spacer_2_2_1|1-37	IMGVR_UViG_3300034521_000039|3300034521|Ga0310137_006761	629	665	TGGTAAGC	TAAGCTGA	29	-	GCTTACCA	UCAAACAGAUCGCUUCAGCAUUUGGGAUAAAAAAUCA	TGATTTTTTATCCCAAAAGCTGAAGCTATTTGCTTGA	spacer 2	https://img.jgi.doe.gov/cgi-bin/vr/main.cgi?section=ViralBrowse&page=uviginfo&uvig_id=IMGVR_UViG_3300034521_000039
spacer_2	spacer_2_2_1|1-37	IMGVR_UViG_3300033987_000046|3300033987|Ga0310150_000433	23176	23212	TGGTAAGC	TAAGCTGA	29	-	GCTTACCA	UCAAACAGAUCGCUUCAGCAUUUGGGAUAAAAAAUCA	TGATTTTTTATCCCAAAAGCTGAAGCTATTTGCTTGA	spacer 2	https://img.jgi.doe.gov/cgi-bin/vr/main.cgi?section=ViralBrowse&page=uviginfo&uvig_id=IMGVR_UViG_3300033987_000046
spacer_16	spacer_16_16_1|1-37	IMGVR_UViG_3300030098_001058|3300030098|Ga0183663_1004851	370	406	AAATTTAA	TGATGATA	29	-	TTAAATTT	UUUUUUAUAUCCUCAACUAGUUGUUCUCUUGCUUUUG	GAAAAGCAAGAGAACAAGTTGTTGAGGATATAGAAAA	spacer 16	https://img.jgi.doe.gov/cgi-bin/vr/main.cgi?section=ViralBrowse&page=uviginfo&uvig_id=IMGVR_UViG_3300030098_001058
spacer_6	spacer_6_6_1|1-36	IMGVR_UViG_3300042802_000008|3300042802|Ga0482166_00071	15047	15012	TGGATGTG	AACCCCAA	28	+	CACATCCA	CAAUACUAUACGCAAGUACAACUGUACUUACAUGCU	AGCATGTAAGTACAACTGCACCTGCGTATAGTATTG	spacer 6	https://img.jgi.doe.gov/cgi-bin/vr/main.cgi?section=ViralBrowse&page=uviginfo&uvig_id=IMGVR_UViG_3300042802_000008
spacer_6	spacer_6_6_1|1-36	IMGVR_UViG_3300026660_000011|3300026660|Ga0208154_10450	3852	3817	TGGATGTG	AACCCCAA	28	+	CACATCCA	CAAUACUAUACGCAAGUACAACUGUACUUACAUGCU	AGCATGTAAGTACAACTGCACCTGCGTATAGTATTG	spacer 6	https://img.jgi.doe.gov/cgi-bin/vr/main.cgi?section=ViralBrowse&page=uviginfo&uvig_id=IMGVR_UViG_3300026660_000011
spacer_6	spacer_6_6_1|1-36	IMGVR_UViG_3300026682_000007|3300026682|Ga0208431_100354	4329	4294	TGGATGTG	AACCCCAA	28	+	CACATCCA	CAAUACUAUACGCAAGUACAACUGUACUUACAUGCU	AGCATGTAAGTACAACTGCACCTGCGTATAGTATTG	spacer 6	https://img.jgi.doe.gov/cgi-bin/vr/main.cgi?section=ViralBrowse&page=uviginfo&uvig_id=IMGVR_UViG_3300026682_000007
spacer_6	spacer_6_6_1|1-36	IMGVR_UViG_3300006630_000010|3300006630|Ga0079292_100672	3726	3691	TGGATGTG	AACCCCAA	28	+	CACATCCA	CAAUACUAUACGCAAGUACAACUGUACUUACAUGCU	AGCATGTAAGTACAACTGCACCTGCGTATAGTATTG	spacer 6	https://img.jgi.doe.gov/cgi-bin/vr/main.cgi?section=ViralBrowse&page=uviginfo&uvig_id=IMGVR_UViG_3300006630_000010
spacer_6	spacer_6_6_1|1-36	IMGVR_UViG_3300042784_000009|3300042784|Ga0482158_0474	386	421	TGGATGTG	AACCCCAA	28	-	CACATCCA	CAAUACUAUACGCAAGUACAACUGUACUUACAUGCU	AGCATGTAAGTACAACTGCACCTGCGTATAGTATTG	spacer 6	https://img.jgi.doe.gov/cgi-bin/vr/main.cgi?section=ViralBrowse&page=uviginfo&uvig_id=IMGVR_UViG_3300042784_000009
spacer_6	spacer_6_6_1|1-36	IMGVR_UViG_3300042783_000008|3300042783|Ga0482159_00322	735	770	TGGATGTG	AACCCCAA	28	-	CACATCCA	CAAUACUAUACGCAAGUACAACUGUACUUACAUGCU	AGCATGTAAGTACAACTGCACCTGCGTATAGTATTG	spacer 6	https://img.jgi.doe.gov/cgi-bin/vr/main.cgi?section=ViralBrowse&page=uviginfo&uvig_id=IMGVR_UViG_3300042783_000008
spacer_7	spacer_7_7_1|1-37	IMGVR_UViG_3300026776_000004|3300026776|Ga0207429_10047	1001	965	TGGTTCGA	ACAGGATA	27	+	TCGAACCA	AAGCUAACCAAAAAUUUGGCAAAAACAGCAUUCAUAA	TTATGAATACTGTTTTTACCGAACTTTTGATTAGCTT	spacer 7	https://img.jgi.doe.gov/cgi-bin/vr/main.cgi?section=ViralBrowse&page=uviginfo&uvig_id=IMGVR_UViG_3300026776_000004
spacer_7	spacer_7_7_1|1-37	IMGVR_UViG_3300002556_000002|3300002556|JGI24229J36425_100013	31345	31381	TGGTTCGA	ACAGGATA	27	-	TCGAACCA	AAGCUAACCAAAAAUUUGGCAAAAACAGCAUUCAUAA	TTATGAATACTGTTTTTACCGAACTTTTGATTAGCTT	spacer 7	https://img.jgi.doe.gov/cgi-bin/vr/main.cgi?section=ViralBrowse&page=uviginfo&uvig_id=IMGVR_UViG_3300002556_000002
spacer_21	spacer_21_21_1|1-37	IMGVR_UViG_3300038957_000088|3300038957|Ga0239564_000457	28319	28283	TGGGTCAT	TAATATCT	27	+	ATGACCCA	AGAAGCAAACUGUUUUUUGAUUAUGUAAAAGCCUUAG	CCAATGCTTTTACATAGTCAAAAAACAATTTGCTTCG	spacer 21	https://img.jgi.doe.gov/cgi-bin/vr/main.cgi?section=ViralBrowse&page=uviginfo&uvig_id=IMGVR_UViG_3300038957_000088
spacer_21	spacer_21_21_1|1-37	IMGVR_UViG_3300033802_000252|3300033802|Ga0373398_000160	88484	88520	TGGATCTT	TAATATAT	27	-	AAGATCCA	AGAAGCAAACUGUUUUUUGAUUAUGUAAAAGCCUUAG	TTAACGCTTTAACATAATCAAAAAACAACTTGCTTCT	spacer 21	https://img.jgi.doe.gov/cgi-bin/vr/main.cgi?section=ViralBrowse&page=uviginfo&uvig_id=IMGVR_UViG_3300033802_000252
spacer_21	spacer_21_21_1|1-37	IMGVR_UViG_3300033753_000159|3300033753|Ga0373397_000189	24223	24187	TGGATCTT	TAATATAT	27	+	AAGATCCA	AGAAGCAAACUGUUUUUUGAUUAUGUAAAAGCCUUAG	TTAACGCTTTAACATAATCAAAAAACAACTTGCTTCT	spacer 21	https://img.jgi.doe.gov/cgi-bin/vr/main.cgi?section=ViralBrowse&page=uviginfo&uvig_id=IMGVR_UViG_3300033753_000159
spacer_2 spacer_2_2_1|1-37 IMGVR_UViG_3300034521_000063|3300034521|Ga0310137_005959 134 98 TGGTAAGC TAAGCTGA 37 + NA NA NA NA 0 UCAAACAGAUCGCUUCAGCAUUUGGGAUAAAAAAUCA TGATTTTTTATCCCAAATGCTGAAGCGATCTGTTTGA spacer 2spacer_20 https://img.jgi.doe.gov/cgi-bin/vr/main.cgi?section=ViralBrowse&page=uviginfo&uvig_id=IMGVR_UViG_3300034521_000063 -------- -------- NA NA NA NA NA

## Sheet: Table S3
Table S3. List of oligonucleotides used in this study
Name	Sequence (5'->3')
ASI132	gatcggtctcACCGGtAAGAGAATTAGAGGGCCTTCC	pyrE HA down forward
ASI133	GATCGGTCTCAAGCTaGTGAAAAAAGATGGTGGTTTTGAG	pyrE HA down reverse
ASI145	aaagAAATCTTTGCATACTTCTTTATAATTTCATCAAATT	hrcA spacer 1 forward
ASI146	aatcAATTTGATGAAATTATAAAGAAGTATGCAAAGATTT	hrcA spacer 1 reverse
ASI151	gatcggtctcACCGGtAAATGCTGTTTTTCGAAACTTCCG	hrcA HA up forward
ASI152	GATCGGTCTCAttgatTTCACCACCCCGTATTTTT	hrcA HA up reverse
ASI153	gatcggtctcAtcaagGTGATACGAGTGCAAGGAATTG	hrcA HA down forward
ASI154	GATCGGTCTCAAGCTcATCCGCTTTTAATTTCTGCAAAATC	hrcA HA down reverse
ASI155	gcaacatagccaggagaaaca	Sequencing of SPF-B017 constructs
ASI160	aaagTTTTAAATTAAAACCGGACTTTTCAAATCTGGTAT	rexA spacer 2 forward
ASI161	aatcATACCAGATTTGAAAAGTCCGGTTTTAATTTAAAA	rexA spacer 2 reverse
ASI164	gatcggtctcACCGGATAGGGCAAAGATTAAAAGG	rexA HA up forward
ASI165	GATCGGTCTCAttgaTATCCTCACCTCATTCTACTATG	rexA HA up reverse
ASI166	gatcggtctcAtcaaTAATAAAAATTACAATTATATTTGAAATTATG	rexA HA down forward
ASI167	GATCGGTCTCAAGCTAAGAAGTGATAAAAATTATCTC	rexA HA down reverse
ASI 168	GATCGGTCTCCAGCTcGCATGATTACGCCAAGC	pyrE crRNA amplified for SPF-B017 forward
ASI 169	tcgcGGTCTCCGATCGG	pyrE crRNA amplified for SPF-B017 reverse
ASI195	aaagTTGTATTAATAGATATTAATAAAGATAAAGCAAAAG	ldh spacer 1 forward
ASI196	aatcCTTTTGCTTTATCTTTATTAATATCTATTAATACAA	ldh spacer 1 reverse
ASI197	aaagGGCTTTTGTGCTGCTCCCGCTGTAATAATTATTATG	ldh spacer 2 forward
ASI198	aatcCATAATAATTATTACAGCGGGAGCAGCACAAAAGCC	ldh spacer 2 reverse
ASI199	GATCGGTCTCATGTCgAGGGGAAACCCTCTTTTTTTG	ldh HA down forward
ASI200	GATCCGGTCTCAAGCTtTAGGAATTTGAGAATTGCCTG	ldh HA down reverse
ASI201	GATCCGGTCTCATTGGtGTGGAATATTAAGAAAGAGGTG	ldh HA up forward
ASI202	gatcggtctcACCGGaGTTGTTGAATAAGTTCTTCCAGCC	ldh HA up reverse
ASI203	GATCGGTCTCACCAAgGAGCTTCCATTACCCTTTC	Ppta pFAST tf0f1 amplification for ldh knock in forward
ASI204	GATCCGGTCTCAGACAgAATAAGGTTTAAATAAAAAACTTCCTAC	Ppta pFAST tf0f1 amplification for ldh knock in reverse
ASI225	ttaccgcctttgagtgagct	Sequencing of SPF-B017 constructs
ASI226	agccaggagaaacaactttacc	Sequencing of SPF-B017 constructs
ASI229	gatcggtctcACCGGAAAAGTGGAGGTTTCCTCATC	pyrE HA 500 bp forward
ASI230	GATCGGTCTCAAGCTTCCTGATGATATATTTAATATAACAAAAG	pyrE HA 500 bp reverse
ASI231	gatcggtctcACCGGGAACCAAAAACGCCGTCATG	pyrE HA 100 bp forward
ASI232	GATCGGTCTCAAGCTGAGGTTATTGAGGGCATAAAAC	pyrE HA 100 bp reverse
ASI236	AAAGCGCATGAGACAGGTTG	hrcA editing verification forward
ASI237	TTCCTTGCACTCGTATCACC	hrcA editing verification reverse
ASI238	ATGCCGCCACAATATGCTTT	hrcA editing verification forward
ASI239	TAGCCTGCCTTTGACTGTCA	hrcA editing verification reverse
ALU001	GCGCTATTATATACATTACCGC	polC genome colony PCR forward
ALU002	CCGCGTGTACCCATTTCTTC	polC genome colony PCR reverse
RH058	aaagATTGCAGGTCCTATTACAACATCTATTTTGTAATCC	pyrE spacer 1 forward
RH059	aatcGGATTACAAAATAGATGTTGTAATAGGACCTGCAAT	pyrE spacer 1 reverse
RH060	aaagTCTTCTTAGCTTCATCACTCCTTCTTCTCTTTCTGC	pyrE spacer 2 forward
RH061	aatcGCAGAAAGAGAAGAAGGAGTGATGAAGCTAAGAAGA	pyrE spacer 2 reverse
RH062	aaagCAGACTTAAAAAGAACTTCAAAATTTACCTTTCCGTgatt	pyrE spacer 3 forward
RH063	aatcACGGAAAGGTAAATTTTGAAGTTCTTTTTAAGTCTG	pyrE spacer 3 reverse
IHU034	ATGGACTTGGATCTCGCTAC	rexA editing verification forward
IHU035	GAGGTAAGCCTTATGATTTGAACC	rexA editing verification reverse
RH125	CCCGTATGAATTTTACTGTG	ldh editing verification forward
RH050	ggagGCTTACCATCAAACAGATCGCTTCAGCATTTGGGATAAAAAATCATCAGCTTA	Spacer 1 with active PAM CCA forward
RH051	AGCGTAAGCTGATGATTTTTTATCCCAAATGCTGAAGCGATCTGTTTGATGGTAAGC	Spacer 1 with active PAM CCA reverse
RH052	ggagGCTTAttgTCAAACAGATCGCTTCAGCATTTGGGATAAAAAATCATCAGCTTA	Spacer 1 with inactive PAM CCA forward
RH053	AGCGTAAGCTGATGATTTTTTATCCCAAATGCTGAAGCGATCTGTTTGAcaaTAAGC	Spacer 1 with inactive PAM CCA reverse
RH054	ggagAAGATCCCAGAAGCAAACTGTTTTTTGATTATGTAAAAGCCTTAGAAGAGCTA	Spacer 2 with active PAM CCC forward
RH055	ggagAAGATCCCAGAAGCAAACTGTTTTTTGATTATGTAAAAGCCTTAGAAGAGCTA	Spacer 2 with active PAM CCC reverse
RH056	ggagAAGATttgAGAAGCAAACTGTTTTTTGATTATGTAAAAGCCTTAGAAGAGCTA	Spacer 2 with inactive PAM CCC forward
RH057	AGCGTAGCTCTTCTAAGGCTTTTACATAATCAAAAAACAGTTTGCTTCTcaaATCTT	Spacer 2 with inactive PAM CCC reverse
ASI240	aaagTAAAATTCAGGAGTATCTGT	pFAST spacer 20 forward
ASI241	aatcACAGATACTCCTGAATTTTA	pFAST spacer 20 reverse
ASI242	aaagTAAAATTCAGGAGTA	pFAST spacer 15 forward
ASI243	aatcTACTCCTGAATTTTA	pFAST spacer 15 reverse
ASI244	aaagTAAAATTCAGG	pFAST spacer 11 forward
ASI245	aatcCCTGAATTTTA	pFAST spacer 11 reverse

## Sheet: Table S4
Table S4. Transcriptomics from heterotrophic batch cultivation of wild type and ΔrexA
Locus_tag	Old_locus_tag	Gene_Name	Annotation	wildtype						ΔrexA					DEA
				Rep1	Rep2	Rep3	Rep 4	Mean	STD	Rep1	Rep2	Rep3	Mean	STD	ΔrexA vs wt
				TPM	TPM	TPM	TPM			TPM	TPM	TPM			log2(FC)	adj. p-value
TKVG1_12580	TKV_RS12120	rpmH	50S ribosomal protein L34	1716.41	1544.57	942.24	1484.44	1421.91	334.549	1691.93	747.98	932.04	1123.98	500.392	-0.401027	0.280411
TKVG1_12575	TKV_RS12115	rnpA	ribonuclease P protein component	980.48	768.97	615.53	788.79	788.442	149.618	1106.92	534.75	588.42	743.363	315.991	-0.172913	0.635162
TKVG1_12570	TKV_RS12110	yidD	membrane protein insertion efficiency factor YidD	679.66	533.65	442.35	557.98	553.41	97.7833	980.42	380.2	552.44	637.687	309.057	0.0909799	0.835982
TKVG1_12565	TKV_RS12105		YidC/Oxa1 family membrane protein insertase	720.47	502.19	483.68	624.12	582.615	111.03	988.12	361.94	593.47	647.843	316.611	0.0385254	0.936877
TKVG1_12560	TKV_RS12100	jag	RNA-binding cell elongation regulator Jag/EloR	305.59	252.2	244.71	280.85	270.837	27.9165	498.24	180.7	215.59	298.177	174.136	0.00842813	0.989191
TKVG1_12555	TKV_RS12095	mnmE	tRNA uridine-5-carboxymethylaminomethyl(34) synthesis GTPase MnmE	184.92	148.34	126.85	147.4	151.877	24.1574	204.41	87.69	99.24	130.447	64.3139	-0.306541	0.408375
TKVG1_12550	TKV_RS12090	mnmG		262.52	205.82	176.58	235.19	220.027	37.0812	205.36	145.83	93.87	148.353	55.7878	-0.614289	0.0726276
TKVG1_12545	TKV_RS12085	rsmG	16S rRNA (guanine(527)-N(7))-methyltransferase RsmG	147.86	123.24	106.1	140.87	129.518	18.736	141.59	84.45	52.47	92.8367	45.148	-0.532542	0.178529
TKVG1_12540	TKV_RS12075		NUDIX hydrolase	156.72	219.54	220.85	178.79	193.975	31.593	129.85	187.25	81.92	133.007	52.7359	-0.540185	0.24944
TKVG1_12535	TKV_RS12070	noc	nucleoid occlusion protein	205.92	232.21	217.18	186.52	210.457	19.2523	187.32	209.51	108.91	168.58	52.8534	-0.362878	0.359207
TKVG1_12530	TKV_RS12065		AAA family ATPase	202.91	273.9	183.12	236.1	224.007	39.8011	188.94	242.65	127.22	186.27	57.7613	-0.289673	0.468159
TKVG1_12525	TKV_RS12060		ParB/RepB/Spo0J family partition protein	274.77	332.06	267.16	280.18	288.543	29.4991	271.74	292.11	173.88	245.91	63.2058	-0.279961	0.416492
TKVG1_12520	TKV_RS12055		aminotransferase class V-fold PLP-dependent enzyme	812.81	751.28	701.43	721.29	746.702	48.6023	747.17	653.48	537.99	646.213	104.779	-0.275766	0.233772
TKVG1_12515	TKV_RS12050		DUF4446 family protein	313.82	299.81	299.27	342.77	313.918	20.3801	333.17	304.19	271.16	302.84	31.027	-0.120926	0.658994
TKVG1_12510	TKV_RS12630			98.03	117.77	147.31	130.97	123.52	20.8508	192.51	138.7	107.98	146.397	42.7874	0.131293	0.780275
TKVG1_12505	TKV_RS12045		cyanophycinase	17.54	18.07	6.89	12.24	13.685	5.23925	37.06	37.55	28.69	34.4333	4.9799	1.15112	0.00433139
TKVG1_12500	TKV_RS12040	cphA	cyanophycin synthetase	13.78	22.64	8.3	12.28	14.25	6.05245	29.47	44.25	37.13	36.95	7.39164	1.20635	0.00545089
TKVG1_12495	TKV_RS12035	yyaC	spore protease YyaC	3.13	15.36	3.48	3.23	6.3	6.04179	14.49	19.84	7.35	13.8933	6.26634	0.757115	0.269334
TKVG1_12490	TKV_RS12030		mechanosensitive ion channel family protein	260.17	285.53	217.87	253.9	254.368	27.9109	233.86	211.64	157.65	201.05	39.1931	-0.394716	0.122616
TKVG1_12485	TKV_RS12025		DUF951 domain-containing protein	439.03	371.28	326.8	448.5	396.402	57.7549	471.51	389.76	276.68	379.317	97.8339	-0.131378	0.69773
TKVG1_12480	TKV_RS12020	rpsF	30S ribosomal protein S6	2420.78	1998.76	1442.47	2471.93	2083.49	477.052	2257.46	1490.4	1289.33	1679.06	510.896	-0.369759	0.240714
TKVG1_12475	TKV_RS12015	ssb	single-stranded DNA-binding protein	1451.91	1175.77	808.46	1461.13	1224.32	307.231	1401.1	971.24	870.47	1080.94	281.81	-0.237904	0.459837
TKVG1_12470	TKV_RS12010	rpsR	30S ribosomal protein S18	2027.52	1530.39	1160.12	2062.07	1695.03	431.472	1970.5	1138.34	1363.85	1490.9	430.381	-0.249491	0.453368
TKVG1_12465	TKV_RS12005		MazG-like family protein	429.38	359.21	258.2	324.76	342.887	71.2927	585.94	243.19	471.67	433.6	174.518	0.23389	0.557513
TKVG1_12460	TKV_RS12000		DUF2232 domain-containing protein	316.28	266.11	209.55	278.8	267.685	44.2236	508.59	231.95	385.13	375.223	138.586	0.37545	0.267838
TKVG1_12455	TKV_RS11995		DHH family phosphoesterase	378.53	299.5	250.81	331.52	315.09	53.7573	533.21	238.22	380.56	383.997	147.525	0.180595	0.619626
TKVG1_12450	TKV_RS11990	rplI	50S ribosomal protein L9	669.82	619.28	557.31	623.91	617.58	46.2041	792.15	506.99	501.79	600.31	166.159	-0.12735	0.620246
TKVG1_12445	TKV_RS11985	dnaB	replicative DNA helicase	498.89	469.38	475.93	484.09	482.072	12.7244	546.81	414.13	351.88	437.607	99.563	-0.221821	0.388731
TKVG1_12440	TKV_RS11980		Crp/Fnr family transcriptional regulator	484.84	491.91	430.86	437.39	461.25	31.5667	489.64	400.62	304.21	398.157	92.7395	-0.283592	0.285181
TKVG1_12435	TKV_RS11975	hcp	hydroxylamine reductase	61.96	41.57	18.15	46.89	42.1425	18.1773	125.92	51.24	72.97	83.3767	38.4122	0.791515	0.0966368
TKVG1_12430	TKV_RS13175		hypothetical protein	252.78	256.92	232.52	259.01	250.308	12.1376	255.57	535.98	298.01	363.187	151.14	0.452056	0.336527
TKVG1_12425	TKV_RS11970		AAA family ATPase	384.92	459.29	353.57	346.96	386.185	51.4726	419.08	630.11	377.08	475.423	135.599	0.240072	0.548341
TKVG1_12420	TKV_RS11965		DDE-type integrase/transposase/recombinase	33.4	34.38	19.64	17.17	26.1475	9.00585	46.88	58.42	53.56	52.9533	5.79387	0.895284	0.0268377
TKVG1_12415	TKV_RS11960			47.21	39.07	51.9	34.97	43.2875	7.67093	30.12	48.87	29.8	36.2633	10.9189	-0.275317	0.57286
TKVG1_12405	TKV_RS11950		hypothetical protein	185.49	169.09	112.72	156.95	156.062	31.1719	159.47	123.51	112.23	131.737	24.6711	-0.296591	0.348468
TKVG1_12400	TKV_RS11945	pyrF		24.75	12.81	8.89	8.25	13.675	7.65355	58.13	12.72	41.74	37.53	22.9959	1.06963	0.0687156
TKVG1_12395	TKV_RS11940		transcriptional regulator	11.48	13.17	18.56	5.38	12.1475	5.42864	18.63	34.27	11.55	21.4833	11.6256	0.551384	0.401271
TKVG1_12390	TKV_RS11935		SurA N-terminal domain-containing protein	31.68	49.09	40.46	30.55	37.945	8.6501	27.12	44.78	14.07	28.6567	15.4126	-0.383965	0.487112
TKVG1_12385	TKV_RS11930		hypothetical protein	26.08	36.18	20.53	24.66	26.8625	6.64278	20.47	43.39	16.76	26.8733	14.4236	-0.027944	0.969895
TKVG1_12380	TKV_RS12625			19.51	16.4	24.56	20.12	20.1475	3.36259	29.01	21.72	20.93	23.8867	4.45448	0.137797	0.783367
TKVG1_12375	TKV_RS13735			1.2	1.27	0	1.24	0.9275	0.618998	0	0.69	0	0.23	0.398372	-0.434709	0.501428
TKVG1_12370	TKV_RS13880		peptidoglycan-binding domain-containing protein	1.64	0	0.68	0	0.58	0.775973	0.61	0.47	2.06	1.04667	0.88036	0.303695	0.690979
TKVG1_12365	TKV_RS13270		hypothetical protein	2.51	0	0	8.63	2.785	4.07235	7.47	6.75	5.05	6.42333	1.24263	0.481478	0.515472
TKVG1_12360	TKV_RS11910		hypothetical protein	7.57	5.07	7.65	6.39	6.67	1.21227	9.9	10.31	9.35	9.85333	0.481698	0.421871	0.472327
TKVG1_12355	TKV_RS13725		hypothetical protein	9.71	9.67	21.58	12.65	13.4025	5.62743	4.05	11.18	11.82	9.01667	4.31315	-0.413769	0.550636
TKVG1_12350	TKV_RS11900			5.04	13.84	8.18	10.39	9.3625	3.70522	4.22	7.58	6.23	6.01	1.69077	-0.543521	0.361051
TKVG1_12345	TKV_RS13170		hypothetical protein	14.46	23.89	13.77	4.26	14.095	8.0189	57.34	21.41	39.48	39.41	17.9651	1.01992	0.108894
TKVG1_12340	TKV_RS11895	pepF		43.48	34.83	26.94	35.85	35.275	6.76567	61.37	44.87	37.39	47.8767	12.2695	0.350858	0.228325
TKVG1_12335	TKV_RS11890	cas8a1	type I-B CRISPR-associated protein Cas8b1/Cst1	123.48	113.82	89.6	121.27	112.042	15.5219	86.21	226.57	117.5	143.427	73.6843	0.305867	0.553514
TKVG1_12330	TKV_RS11885	cas7i	type I-B CRISPR-associated protein Cas7/Cst2/DevR	145.07	153.55	127.2	148.15	143.493	11.4131	112.06	281.05	164.97	186.027	86.4404	0.317537	0.522719
TKVG1_12325	TKV_RS11880	cas5b	type I-B CRISPR-associated protein Cas5b	191.4	216.83	159.25	200.78	192.065	24.266	165.11	483.14	257.68	301.977	163.577	0.557819	0.282545
TKVG1_12320	TKV_RS11875		CRISPR-associated helicase/endonuclease Cas3	107.81	117.24	78.56	106.69	102.575	16.6945	114.07	216.42	156.93	162.473	51.3997	0.590954	0.149162
TKVG1_12315	TKV_RS11870	cas4	CRISPR-associated protein Cas4	65.12	79.35	50.98	89.16	71.1525	16.6812	58.4	148.99	100.33	102.573	45.3366	0.45004	0.380176
TKVG1_12310	TKV_RS11865	cas1b	type I-B CRISPR-associated endonuclease Cas1b	123.93	131.05	75.3	125.26	113.885	25.9084	146.71	241.89	229.23	205.943	51.6866	0.769557	0.0547254
TKVG1_12305	TKV_RS11860	cas2	CRISPR-associated endonuclease Cas2	81.65	67.27	64.98	91.61	76.3775	12.5523	98.44	156.93	147.59	134.32	31.422	0.703787	0.0949846
TKVG1_12300	TKV_RS11855	cas6	CRISPR-associated endoribonuclease Cas6	52.59	67.44	45.6	56.83	55.615	9.14253	73.91	100.95	97.85	90.9033	14.7981	0.626185	0.0821004
TKVG1_12295	TKV_RS11850			40.38	56.76	56.47	34.63	47.06	11.2807	47.68	71.59	44.26	54.51	14.8902	0.131948	0.810743
TKVG1_12290	TKV_RS11845		YitT family protein	82.67	81.9	77.71	60.93	75.8025	10.1517	65.63	61.58	65.73	64.3133	2.36766	-0.288481	0.364256
TKVG1_12285	TKV_RS11840		XapX domain-containing protein	370.49	393.93	361.53	349.65	368.9	18.7431	381.64	278.58	248.42	302.88	69.8553	-0.35713	0.199248
TKVG1_12280	TKV_RS11835		HAMP domain-containing methyl-accepting chemotaxis protein	434.93	508.35	441.46	476.56	465.325	34.0136	466.39	438.92	295.08	400.13	92.0069	-0.28082	0.362037
TKVG1_12275	TKV_RS11830		NAD(P)/FAD-dependent oxidoreductase	60.34	67.42	20.36	68.21	54.0825	22.7584	85.5	60.16	26.69	57.45	29.4985	0.0190822	0.981511
TKVG1_12270	TKV_RS11825		adenylosuccinate synthase	87.2	85.69	36.13	88.66	74.42	25.5554	107.41	82.49	27.44	72.4467	40.9201	-0.0898383	0.889662
TKVG1_12260	TKV_RS13720		tyrosine-type recombinase/integrase	35.02	13.39	10.61	21.34	20.09	10.9427	23.67	38.5	65.64	42.6033	21.2838	0.806687	0.199248
TKVG1_12255	TKV_RS11815		FapA family protein	50.55	74.02	32.9	63.56	55.2575	17.7293	36.89	73.12	51.51	53.84	18.227	-0.03606	0.953711
TKVG1_12250	TKV_RS13715		hypothetical protein	27.21	63.06	33.33	48.16	42.94	16.04	26.36	48.79	56.6	43.9167	15.698	0.0101263	0.990022
TKVG1_12245	TKV_RS11810		GGDEF and EAL domain-containing protein	62.36	114.61	57.02	90.76	81.1875	26.7534	74.15	106.83	117.74	99.5733	22.683	0.24573	0.600754
TKVG1_12240	TKV_RS11805		glutamine synthetase III	96.26	75.82	50.25	79.4	75.4325	19.0073	122.11	96.17	98.77	105.683	14.2852	0.413933	0.136339
TKVG1_12235	TKV_RS11800		ammonium transporter	0.43	1.37	0.48	0.45	0.6825	0.458794	2.37	0	3.71	2.02667	1.87868	0.713423	0.336527
TKVG1_12230	TKV_RS11795		P-II family nitrogen regulator	0	1.81	1.91	3.55	1.8175	1.45069	0.85	0	2.59	1.14667	1.32024	-0.228998	0.766263
TKVG1_12225	TKV_RS11790		type 1 glutamine amidotransferase	2.46	1.72	1.82	0.85	1.7125	0.661885	4.47	1.89	3.3	3.22	1.29186	0.554829	0.427589
TKVG1_12220	TKV_RS11785		glutamine amidotransferase family protein	464.37	320.35	562.32	392.59	434.907	103.306	310.71	161.92	106.25	192.96	105.705	-1.15167	0.0135634
TKVG1_12215	TKV_RS11780		glutamate synthase-related protein	639.04	432.86	746.1	475.91	573.477	145.361	430.08	198.92	141.52	256.84	152.751	-1.13702	0.0161482
TKVG1_12210	TKV_RS11775		hypothetical protein	474.88	345.25	619.81	379.79	454.933	122.827	289.75	125.63	82.18	165.853	109.475	-1.36941	0.00558375
TKVG1_12205	TKV_RS11770			36.99	9.72	35.96	21.46	26.0325	12.9824	42.78	1.77	8.53	17.6933	21.987	-0.444141	0.550636
TKVG1_12200	TKV_RS11765		metalloregulator ArsR/SmtB family transcription factor	58.5	61.91	434.66	50.9	151.493	188.834	79.69	60.95	76.44	72.36	10.0141	-0.780633	NA
TKVG1_12195	TKV_RS12600			89.83	91.69	666.24	53.45	225.303	294.485	87.26	90.09	74.45	83.9333	8.33381	-0.96396	NA
TKVG1_12190	TKV_RS11750		DUF3006 domain-containing protein	106.8	91.86	932.89	115.51	311.765	414.198	115.5	128.97	139.97	128.147	12.2558	-0.865639	NA
TKVG1_12185	TKV_RS11745		ComEC/Rec2 family competence protein	69.72	51.35	469.71	53.82	161.15	205.868	74.36	52.43	74.38	67.0567	12.6671	-0.896957	NA
TKVG1_12180	TKV_RS11740		transposase	349.64	315.99	422.3	344.96	358.223	45.2366	306.26	296.5	258.93	287.23	24.9896	-0.381021	0.267838
TKVG1_12175	TKV_RS11735		DUF1015 family protein	439.49	367.53	620.37	434.06	465.362	108.394	463.69	368	299.3	376.997	82.5634	-0.382629	0.358652
TKVG1_12170	TKV_RS11730		M1 family metallopeptidase	32.94	25.2	24.51	21.09	25.935	5.00383	72.69	22.85	64.93	53.49	26.8172	0.824632	0.0808189
TKVG1_12165	TKV_RS11725		ATP-binding protein	190.49	189.5	130.26	215.57	181.455	36.1991	201.9	173.36	155.26	176.84	23.5139	-0.0939291	0.754448
TKVG1_12160	TKV_RS11720		DnaD domain protein	231.23	193.45	136.94	233.73	198.837	45.1925	193.99	163.44	148.43	168.62	23.2175	-0.285394	0.321576
TKVG1_12155	TKV_RS11715		peptidoglycan DD-metalloendopeptidase family protein, CBM50 family	219.69	240.63	110.03	235.45	201.45	61.5938	535.45	191.8	365.61	364.287	171.829	0.688607	0.119891
TKVG1_12150	TKV_RS11710		peptidase MA family metallohydrolase	536.36	509.37	349.54	496.65	472.98	83.9424	678.07	451.66	534.55	554.76	114.55	0.156536	0.507083
TKVG1_12145	TKV_RS11705		response regulator	468.94	457.75	311.58	499.45	434.43	83.7745	579.39	376.44	410.82	455.55	108.617	-0.00554015	0.989191
TKVG1_12140	TKV_RS11700		ATP-binding protein	371.74	407	271.15	395.14	361.257	61.8322	462.92	363.87	328.06	384.95	69.8576	0.0239332	0.934078
TKVG1_12135	TKV_RS11695		hypothetical protein	3215.14	4943.16	3891.82	2639.93	3672.51	989.622	2681.62	6712.83	8297.92	5897.46	2895.57	0.554779	0.320412
TKVG1_12130	TKV_RS11690	yycH	two-component system activity regulator YycH	660.08	757.63	617.04	447.64	620.597	129.439	797.85	770.39	2280.05	1282.76	863.785	0.843541	0.118341
TKVG1_12125	TKV_RS11685	yycI	two-component system regulatory protein YycI	290.23	313.01	252.2	218.92	268.59	41.5418	474.32	341.33	1364.15	726.6	556.124	1.14188	0.0376525
TKVG1_12120	TKV_RS11680		UDP-N-acetylglucosamine 1-carboxyvinyltransferase	280.48	219.39	138.73	249.18	221.945	60.8259	381.79	166.53	546.55	364.957	190.568	0.576232	0.245787
TKVG1_12115	TKV_RS11675		trypsin-like peptidase domain-containing protein	278.39	219.62	129.97	223.91	212.972	61.4619	345.89	213.34	417.61	325.613	103.634	0.519215	0.19115
TKVG1_12110	TKV_RS12595		CxxH/CxxC protein	168.18	124.85	107.89	151.12	138.01	26.8483	303.37	116.82	312.14	244.11	110.324	0.65858	0.144404
TKVG1_12105	TKV_RS11670	rlmH	23S rRNA (pseudouridine(1915)-N(3))-methyltransferase RlmH	163.07	153.1	116.19	155.68	147.01	20.9766	245.26	159.13	232.24	212.21	46.4273	0.44327	0.104747
TKVG1_12100	TKV_RS11665		23S rRNA (pseudouridine(1915)-N(3))-methyltransferase RlmH	129.34	148.15	108.7	153.59	134.945	20.3488	187.12	116.83	210.25	171.4	48.6535	0.259855	0.4701
TKVG1_12095	TKV_RS11660	tyrS	tyrosine--tRNA ligase	231.52	173.16	150.3	211.86	191.71	36.7412	215.8	143.01	147.2	168.67	40.8695	-0.252974	0.359148
TKVG1_12090	TKV_RS11655		nucleoside phosphorylase	114.7	104.49	76.87	95.75	97.9525	16.0472	144.38	72.71	74.58	97.2233	40.8496	-0.0996369	0.789812
TKVG1_12085	TKV_RS11650		DNA repair photolyase	102.2	88.43	56.86	90.83	84.58	19.4315	134.99	67.5	76.39	92.96	36.6695	0.045766	0.914439
TKVG1_12080	TKV_RS11645			132.42	137.37	157.68	139.94	141.852	11.0035	149.57	174.05	120.9	148.173	26.6025	-0.010433	0.983662
TKVG1_12075	TKV_RS11640		co-chaperone GroES	180.39	176.2	133.44	227.71	179.435	38.546	253.81	140.07	117.18	170.353	73.1762	-0.159939	0.705141
TKVG1_12070	TKV_RS11635	sufC	Fe-S cluster assembly ATPase SufC	581	403.54	718.62	490.29	548.362	134.659	442.23	352.54	352.77	382.513	51.7163	-0.573528	0.145367
TKVG1_12065	TKV_RS11630	sufB	Fe-S cluster assembly protein SufB	610.26	419.6	808.03	547.19	596.27	161.925	519.22	417.31	391.55	442.693	67.514	-0.49105	0.2426
TKVG1_12060	TKV_RS11625	sufD	Fe-S cluster assembly protein SufD	649.25	505.45	897.88	590.06	660.66	168.798	524.19	439.08	377.15	446.807	73.8239	-0.614786	0.131176
TKVG1_12055	TKV_RS11620		cysteine desulfurase	729.86	498.75	1044.56	612.75	721.48	235.147	567.9	447.57	379.89	465.12	95.2257	-0.672272	0.134075
TKVG1_12050	TKV_RS11615		SUF system NifU family Fe-S cluster assembly protein	567.09	467.79	939.74	530.14	626.19	213.012	460	440.81	336.48	412.43	66.4708	-0.632175	0.172633
TKVG1_12045	TKV_RS11610	cas6	CRISPR-associated endoribonuclease Cas6	52.79	61.16	34.89	38.35	46.7975	12.3199	40.87	61.9	38.56	47.11	12.8605	-0.0177151	0.978163
TKVG1_12040	TKV_RS11605		CRISPR-associated protein Csx14	46.22	48.91	35.5	37.28	41.9775	6.5849	55.35	72.17	38.84	55.4533	16.6652	0.324898	0.41552
TKVG1_12035	TKV_RS11600	csx15	CRISPR-associated protein Csx15	48.92	87.82	50.6	45.03	58.0925	19.9552	61.56	182.91	81.76	108.743	65.0195	0.731963	0.193992
TKVG1_12030	TKV_RS11595	csx2	TIGR02221 family CRISPR-associated protein	76.7	81.46	76.74	74.76	77.415	2.85061	81.12	163.67	104.42	116.403	42.5597	0.50157	0.259063
TKVG1_12025	TKV_RS11590	cmr1	type III-B CRISPR module RAMP protein Cmr1	73.53	87.52	80.13	71.08	78.065	7.37151	79.75	224.83	106.8	137.127	77.1481	0.674793	0.19371
TKVG1_12020	TKV_RS11585		type III-B CRISPR-associated protein Cas10/Cmr2	52.32	73.95	51.2	48.37	56.46	11.7779	61.68	145.89	73.95	93.84	45.4922	0.61966	0.212072
TKVG1_12015	TKV_RS11580		IS1182-like element ISTte1 family transposase	10.09	9.8	5.13	10.31	8.8325	2.47715	14.39	14.95	11.41	13.5833	1.90288	0.521155	0.193402
TKVG1_12010	TKV_RS11575		hypothetical protein	0.81	0	0	0.83	0.41	0.473498	2.81	3.73	2.24	2.92667	0.75182	1.37034	0.0528526
TKVG1_12005	TKV_RS11570		type III-B CRISPR module-associated Cmr3 family protein	0.53	0.56	0.59	0	0.42	0.281069	0	0.61	1.2	0.603333	0.600028	0.211927	0.783367
TKVG1_12000	TKV_RS11565	cmr4	type III-B CRISPR module RAMP protein Cmr4	0	0.74	0.78	2.17	0.9225	0.9057	0	0	1.23	0.41	0.710141	-0.25128	0.725035
TKVG1_11995	TKV_RS11560	cmr5	type III-B CRISPR module-associated protein Cmr5	1.36	0	0.75	3.5	1.4025	1.50489	1.35	0	1.71	1.02	0.901499	-0.123955	0.878263
TKVG1_11990	TKV_RS11555	cmr6	type III-B CRISPR module RAMP protein Cmr6	0	0	0.37	0	0.0925	0.185	1	0	0	0.333333	0.57735	0.152458	0.753588
TKVG1_11985	TKV_RS11550		TIGR02556 family CRISPR-associated protein	1.66	4.07	1.23	2.56	2.38	1.25557	2.19	2.62	0.28	1.69667	1.24557	-0.347937	0.636046
TKVG1_11980	TKV_RS11545	cas7b	type I-B CRISPR-associated protein Cas7/Csh2	6.36	3.73	1.32	3.82	3.8075	2.05824	5.28	3.92	0.6	3.26667	2.40743	-0.194976	0.803257
TKVG1_11975	TKV_RS11540	cas5b	type I-B CRISPR-associated protein Cas5b	0.55	1.53	0	6.75	2.2075	3.09374	2.88	3.56	0.37	2.27	1.68021	0.00263847	0.998021
TKVG1_11970	TKV_RS11535		CRISPR-associated helicase/endonuclease Cas3	2.12	1.74	1.57	2.86	2.0725	0.573142	1.58	2.38	1.07	1.67667	0.660328	-0.279695	0.652569
TKVG1_11965	TKV_RS11530	cas4	CRISPR-associated protein Cas4	1.09	0.57	1.82	0	0.87	0.774123	0.81	4.08	0	1.63	2.16007	0.320016	0.663018
TKVG1_11960	TKV_RS11525	cas1b	type I-B CRISPR-associated endonuclease Cas1b	1.17	4.32	0.98	2.27	2.185	1.53272	0.29	3.55	2.36	2.06667	1.64968	-0.021062	0.983662
TKVG1_11955	TKV_RS11520	cas2	CRISPR-associated endonuclease Cas2	0	3.48	3.68	5.12	3.07	2.17314	5.47	3.81	6.66	5.31333	1.43144	0.341176	0.663488
TKVG1_11950	TKV_RS12940		hypothetical protein	2	4.2	10.66	1.24	4.525	4.27827	2.38	3.22	5.22	3.60667	1.45895	-0.258344	0.74895
TKVG1_11945	TKV_RS11515		hypothetical protein	3.58	8.59	34.64	2.64	12.3625	15.0795	10.13	12.36	8.22	10.2367	2.07206	-0.252854	0.755752
TKVG1_11940	TKV_RS11510			5.33	3.73	25.66	5.5	10.055	10.4338	2.11	8.59	3.57	4.75667	3.39908	-0.646373	0.377185
TKVG1_11935	TKV_RS11505	cas10	type III-B CRISPR-associated protein Cas10/Cmr2	7.4	12.74	7.27	6.97	8.595	2.76919	10.64	32.74	16.35	19.91	11.472	0.994359	0.0698676
TKVG1_11930	TKV_RS11500	csx1	CRISPR-associated CARF protein Csx1	8.74	11.12	6.53	4.68	7.7675	2.78383	9.33	33.86	21.79	21.66	12.2655	1.13923	0.0546788
TKVG1_11925	TKV_RS13710		TM1812 family CRISPR-associated protein	4.09	5.23	2.92	4.52	4.19	0.968401	5.51	19.2	14.71	13.14	6.97873	1.16018	0.0647394
TKVG1_11920	TKV_RS11490	cmr1	type III-B CRISPR module RAMP protein Cmr1	5.36	9.44	4.03	1.95	5.195	3.15882	9.53	17.97	16.49	14.6633	4.50677	1.1387	0.0550858
TKVG1_11915	TKV_RS11485	cmr3	type III-B CRISPR module-associated protein Cmr3	5.01	11.88	5.57	3.05	6.3775	3.82413	4.84	29.14	20.28	18.0867	12.2976	1.05066	0.11441
TKVG1_11910	TKV_RS11480	cmr4	type III-B CRISPR module RAMP protein Cmr4	6.52	9.19	4.32	5.29	6.33	2.10851	11.28	32.91	22.46	22.2167	10.8171	1.45322	0.00698313
TKVG1_11905	TKV_RS11475	cmr5	type III-B CRISPR module-associated protein Cmr5	2.14	12.76	7.93	4.42	6.8125	4.62522	4.25	34.95	16.87	18.69	15.4307	0.888285	0.211403
TKVG1_11900	TKV_RS11470	cmr6	type III-B CRISPR module RAMP protein Cmr6	7.42	8.12	6.93	3.06	6.3825	2.26819	6.03	34.2	20.16	20.13	14.085	1.203	0.0591425
TKVG1_11895	TKV_RS11465		TrmH family RNA methyltransferase	132.07	118.51	130.64	125.54	126.69	6.13139	90.1	100.96	38.88	76.6467	33.1546	-0.714957	0.110903
TKVG1_11890	TKV_RS11460		EamA family transporter	133.5	120.44	103.04	148.72	126.425	19.4062	114.06	97.85	49.31	87.0733	33.6934	-0.562177	0.163678
TKVG1_11885	TKV_RS11455		DUF4416 family protein	158.05	142.61	125.87	183.61	152.535	24.533	117.38	117.73	59.41	98.1733	33.5705	-0.647433	0.0929567
TKVG1_11880	TKV_RS11450		glycosidase, GH130 family	207.61	197.73	145.18	213.02	190.885	31.1207	165.12	147.24	114.45	142.27	25.698	-0.470342	0.0698428
TKVG1_11875	TKV_RS13705		hypothetical protein	243.98	279.37	177.05	310.08	252.62	57.1626	248.04	271.68	122.69	214.137	80.0724	-0.266983	0.554824
TKVG1_11870	TKV_RS13700		hypothetical protein	362.75	348.25	239.76	374.17	331.233	61.8972	366.3	367.05	198.47	310.607	97.1139	-0.141788	0.731763
TKVG1_11865	TKV_RS13695		FAD-dependent oxidoreductase	412.11	296.55	231.96	347.19	321.953	76.3964	287.16	302.55	188.25	259.32	62.0276	-0.339434	0.354972
TKVG1_11860	TKV_RS13690		hypothetical protein	231.53	189.21	170.96	256.54	212.06	39.0251	207.32	203	158.5	189.607	27.0256	-0.214889	0.527289
TKVG1_11855	TKV_RS11440		MBL fold metallo-hydrolase	128.09	111.29	81.75	122.88	111.002	20.7272	124.95	68.38	78.12	90.4833	30.2437	-0.36094	0.239178
TKVG1_11850	TKV_RS11435			279.38	328.31	173.81	314.64	274.035	69.9242	296.8	499.07	203.98	333.283	150.89	0.232518	0.6514
TKVG1_11845	TKV_RS11430		ACT domain-containing protein	261.23	148.58	65.69	265.7	185.3	96.4096	200.69	87.86	18.6	102.383	91.9097	-0.676838	0.316252
TKVG1_11840	TKV_RS11425		homoserine dehydrogenase	293.37	185.98	90.38	309.89	219.905	102.343	266.94	108.09	37.41	137.48	117.554	-0.600415	0.345319
TKVG1_11835	TKV_RS11420	thrC	threonine synthase	221.5	116.27	69.58	230.32	159.417	79.1915	211.24	86.73	23.3	107.09	95.6099	-0.506862	0.441953
TKVG1_11830	TKV_RS11415	thrB	homoserine kinase	224.98	142.2	79.78	248.59	173.887	77.5698	235.18	100.79	30.81	122.26	103.863	-0.473644	0.457674
TKVG1_11825	TKV_RS11410		S41 family peptidase	130.7	101.4	66.19	123.11	105.35	28.9088	130.3	82.77	46.27	86.4467	42.1355	-0.333187	0.460029
TKVG1_11820	TKV_RS13860		S8 family serine peptidase	8.5	8.93	6.73	8.5	8.165	0.977906	19.91	35.15	6.09	20.3833	14.5358	0.991581	0.0956515
TKVG1_11815	TKV_RS11405		S-layer homology domain-containing protein	10.41	11.77	7.59	15.21	11.245	3.16508	26.44	40.87	7.6	24.97	16.6836	0.882913	0.127516
TKVG1_11810	TKV_RS11400		alanine--glyoxylate aminotransferase family protein	844.26	586.94	353.56	694.95	619.928	206.554	1144.38	426.7	704.94	758.673	361.845	0.18284	0.705187
TKVG1_11805	TKV_RS11395	serA	phosphoglycerate dehydrogenase	714.93	523.13	370.24	604.74	553.26	145.134	1192.63	354.42	666.2	737.75	423.661	0.272928	0.567134
TKVG1_11800	TKV_RS11390		hypothetical protein	359.14	288.8	268.5	294.76	302.8	39.206	480.18	231.91	360.1	357.397	124.157	0.140032	0.697278
TKVG1_11795	TKV_RS12590		hypothetical protein	1120.18	940.31	720.27	962.55	935.827	164.504	1222.78	826.26	971.11	1006.72	200.644	0.0331581	0.909562
TKVG1_11790	TKV_RS11385		HAD family hydrolase	911.02	832.34	792.11	826.87	840.585	50.2228	1109.66	735.7	895.26	913.54	187.649	0.0350395	0.896501
TKVG1_11785	TKV_RS11380		hypothetical protein	1383.59	1286.63	1126.31	1085.71	1220.56	139.058	1810.6	1003.87	1689.69	1501.39	435.083	0.205404	0.527289
TKVG1_11780	TKV_RS12935		hypothetical protein	178.01	145.44	80.02	109.33	128.2	42.6444	231.81	118.35	260.41	203.523	75.1356	0.544373	0.226485
TKVG1_11775	TKV_RS12585			95.13	66.89	45.93	60.9	67.2125	20.5936	282.26	136	226.98	215.08	73.8526	1.45242	5.48869e-05
TKVG1_11770	TKV_RS11375		AAA family ATPase	371.28	410.93	340.24	344.34	366.697	32.5442	413.14	558.7	410.36	460.733	84.853	0.267806	0.428799
TKVG1_11765	TKV_RS11365		hypothetical protein	18.79	33.75	11.31	17.77	20.405	9.49315	27.17	12.63	17.33	19.0433	7.41987	-0.141204	0.83733
TKVG1_11760	TKV_RS11360		DUF986 family protein	20.58	25.79	6.74	25.04	19.5375	8.83618	34.26	10.94	6.37	17.19	14.9586	-0.225161	0.753112
TKVG1_11755	TKV_RS12925		hypothetical protein	42.35	44.52	29.84	61.79	44.625	13.1456	70.65	20.22	38.44	43.1033	25.5364	-0.104704	0.871995
TKVG1_11750	TKV_RS11355		histidinol-phosphatase	51.75	29.72	28.45	39.25	37.2925	10.7763	45.31	27.24	17.35	29.9667	14.178	-0.360363	0.430804
TKVG1_11745	TKV_RS11350		CTP synthase	192.92	130.35	61.93	132.6	129.45	53.5354	226.49	70.36	116.21	137.687	80.2501	-0.00202243	0.998021
TKVG1_11740	TKV_RS11345		type II toxin-antitoxin system Phd/YefM family antitoxin	756.09	921.84	708.75	965.27	837.988	124.688	659.95	688.79	344.38	564.373	191.065	-0.588578	0.12469
TKVG1_11735	TKV_RS11340		putative toxin-antitoxin system toxin component,PIN family	465.56	539.69	473.86	622.51	525.405	72.7364	447.34	467.41	267.67	394.14	109.985	-0.453799	0.212072
TKVG1_11730	TKV_RS11335			637.87	674.84	647.21	842.43	700.587	95.8556	581.48	626.44	399.6	535.84	120.11	-0.428587	0.210607
TKVG1_11725	TKV_RS11330		S-layer homology domain-containing protein	352.12	343.13	229.77	277.09	300.527	57.8293	385.72	289.15	617.18	430.683	168.574	0.436189	0.288615
TKVG1_11720	TKV_RS13680		DUF4127 family protein	108.61	122.82	123.43	90.81	111.418	15.35	130.51	55.91	45.52	77.3133	46.3616	-0.567765	0.234797
TKVG1_11715	TKV_RS11325		DUF4127 family protein	155.79	168.44	132.16	159.09	153.87	15.4331	196.82	124.22	161.58	160.873	36.3052	-0.0155384	0.958605
TKVG1_11710	TKV_RS11320		stalk domain-containing protein, GH26 family	156.14	171.23	163.86	156.41	161.91	7.16956	226.08	150.46	139.58	172.04	47.1151	-0.00951209	0.981679
TKVG1_11705	TKV_RS11315		S-layer homology domain-containing protein	23187.7	25508.2	21670.6	22160.4	23131.7	1705.79	19816.6	23788.9	16512.6	20039.4	3643.28	-0.250082	0.427035
TKVG1_11700	TKV_RS11310		DeoR/GlpR family DNA-binding transcription regulator	25.94	71.85	33.5	98.88	57.5425	34.1089	341.41	20.39	51.47	137.757	177.052	0.66551	0.354118
TKVG1_11695	TKV_RS11305	fruK	1-phosphofructokinase	29.82	110.1	54.99	151.67	86.645	54.8012	561.59	21.57	71.28	218.147	298.467	0.650506	0.370176
TKVG1_11690	TKV_RS11300	fruA2	fructose PTS transporter subunit IIA	69.4	273.31	134.32	396.57	218.4	146.094	1203.82	38.65	150.08	464.183	642.963	0.492313	0.50787
TKVG1_11685	TKV_RS11295	fruA1	fructose-specific PTS transporter subunit EIIC	177.28	551.73	245.14	491.27	366.355	182.948	1808.91	158.84	263.94	743.897	923.824	0.551693	0.428546
TKVG1_11680	TKV_RS11290		hypothetical protein	2205.15	2750.34	2207.09	2480.63	2410.8	260.738	2236.98	4063.3	2353.53	2884.6	1022.44	0.206346	0.652184
TKVG1_11675	TKV_RS11285		Hsp20/alpha crystallin family protein	3046.16	3721.15	2964.03	3209.59	3235.23	339.643	2942.01	5142.37	2694.82	3593.07	1347.42	0.106368	0.826119
TKVG1_11670	TKV_RS11280		type II CAAX endopeptidase family protein	40.86	28.3	19.94	31.23	30.0825	8.6317	120.71	24.36	28.2	57.7567	54.553	0.629069	0.285181
TKVG1_11665	TKV_RS11275		LacI family DNA-binding transcriptional regulator	77.13	96.33	99.27	83.56	89.0725	10.4829	95.83	135.15	84.65	105.21	26.5245	0.163942	0.713505
TKVG1_11660	TKV_RS11270	murC	UDP-N-acetylmuramate--L-alanine ligase	84.77	93.5	48.49	80.66	76.855	19.6533	116.44	95.83	51.56	87.9433	33.1512	0.119492	0.792634
TKVG1_11655	TKV_RS11265	purR	pur operon repressor	57.55	34.89	14.12	36.42	35.745	17.7415	46.55	23.99	17.04	29.1933	15.4278	-0.304077	0.597584
TKVG1_11650	TKV_RS11260	spoVG	septation regulator SpoVG	846.7	751.22	442	1286.33	831.562	348.93	723.46	1068.34	665.72	819.173	217.707	-0.0371845	0.95196
TKVG1_11645	TKV_RS11255	glmU	bifunctional UDP-N-acetylglucosamine diphosphorylase/glucosamine-1-phosphate N-acetyltransferase GlmU	216.43	152.33	94.09	221.3	171.038	60.16	107.64	135.27	75.18	106.03	30.0773	-0.643362	0.142659
TKVG1_11640	TKV_RS11250		ribose-phosphate diphosphokinase	317.16	246.79	183.28	310.72	264.488	62.7686	214.22	197.9	124.45	178.857	47.8189	-0.585272	0.0909893
TKVG1_11635	TKV_RS11245		response regulator transcription factor	567.87	540.76	436.06	527.1	517.947	57.1606	628.61	482.12	471.78	527.503	87.7134	-0.0457575	0.824916
TKVG1_11630	TKV_RS11240		HAMP domain-containing sensor histidine kinase	582.25	543.91	423.43	526.8	519.097	67.8614	697.18	485.76	569.64	584.193	106.459	0.096497	0.635584
TKVG1_11625	TKV_RS11235		trypsin-like peptidase domain-containing protein	952.6	721.14	496.11	1006.75	794.15	234.139	2231.81	863.95	2495.8	1863.85	875.944	1.01845	0.0284343
TKVG1_11620	TKV_RS11230	pth	aminoacyl-tRNA hydrolase	142.51	136.09	89.04	149.69	129.333	27.4301	617.89	111.22	610.33	446.48	290.368	1.36536	0.0137134
TKVG1_11615	TKV_RS11225		hypothetical protein	81.31	72.19	46.49	111.96	77.9875	27.0239	339.24	52.28	304.47	231.997	156.607	1.14365	0.0535453
TKVG1_11610	TKV_RS11220	mfd	transcription-repair coupling factor	62.39	58.29	43.51	61.31	56.375	8.75043	103.59	50.22	93.39	82.4	28.3315	0.439722	0.19724
TKVG1_11605	TKV_RS11215		peptidylprolyl isomerase	401.88	358.24	198.81	367.44	331.593	90.4925	804.14	269.38	704.75	592.757	284.427	0.672165	0.141327
TKVG1_11600	TKV_RS11210	spoVT	stage V sporulation protein T	35.88	51.59	18.76	28.03	33.565	13.9054	59.11	102.1	63.95	75.0533	23.5478	0.998263	0.0380942
TKVG1_11595	TKV_RS11205	yabG	sporulation peptidase YabG	14.36	12.94	10.26	11.99	12.3875	1.72049	38.64	13.39	46.25	32.76	17.201	1.13	0.0240719
TKVG1_11590			ISLre2 family transposase	168.25	209.8	153.77	173.98	176.45	23.8044	284.65	222.21	286.49	264.45	36.5925	0.501496	0.0420538
TKVG1_11585	TKV_RS11195		Veg family protein	4514.87	4665.14	3550.69	4855.58	4396.57	580.898	5814.18	3835.94	5332.52	4994.21	1031.6	0.108306	0.682548
TKVG1_11580	TKV_RS11190		SPOCS domain-containing protein	564.19	393.65	217.26	421.71	399.202	142.433	1016.8	277.81	860.3	718.303	389.421	0.65338	0.206814
TKVG1_11575	TKV_RS11185	ispE	4-(cytidine 5'-diphospho)-2-C-methyl-D-erythritol kinase	208.47	188.77	141.86	175.52	178.655	28.0175	190.51	127.88	143.78	154.057	32.5551	-0.27946	0.212784
TKVG1_11570	TKV_RS11180			298.36	260.65	223.09	238.94	255.26	32.5981	253.89	186.76	175.6	205.417	42.3484	-0.380898	0.0908049
TKVG1_11565	TKV_RS11175		NTP transferase domain-containing protein	307.13	272.24	224.15	293.91	274.358	36.4308	314.1	209.27	224.2	249.19	56.7072	-0.211243	0.356738
TKVG1_11560	TKV_RS11170		CLC_0170 family protein	2.74	6.47	0	4.94	3.5375	2.81167	12.2	7.09	4.13	7.80667	4.08245	0.532632	0.472188
TKVG1_11555	TKV_RS11165		spore germination protein	9.45	8.03	3.43	3	5.9775	3.24686	11.9	18.32	12.71	14.31	3.4963	1.03956	0.0524516
TKVG1_11550	TKV_RS11160		endospore germination permease	2.89	3.45	3.21	0.68	2.5575	1.27251	9.63	7.86	6.99	8.16	1.34533	1.26467	0.021615
TKVG1_11545	TKV_RS11155		Ger(x)C family spore germination protein	4.79	3.58	5.6	3.12	4.2725	1.13106	9	6.39	8.37	7.92	1.36195	0.685675	0.168058
TKVG1_11540	TKV_RS11150	spoIIR	stage II sporulation protein R	10.81	41.84	14.83	15.19	20.6675	14.2539	28.51	51.94	23.14	34.53	15.3147	0.55543	0.36733
TKVG1_11535	TKV_RS11145	sleB	spore cortex-lytic enzyme	5.92	13.29	0	5.26	6.1175	5.46635	12.13	24.43	16.41	17.6567	6.24405	0.950954	0.175992
TKVG1_11530	TKV_RS11140	ypeB	germination protein YpeB	8.4	18.23	7.15	6.41	10.0475	5.51647	20.12	36.81	24.36	27.0967	8.67502	1.16985	0.0267825
TKVG1_11525	TKV_RS11135		small, acid-soluble spore protein, alpha/beta type	18.39	22.42	8.99	4.55	13.5875	8.244	13.85	24.57	22.19	20.2033	5.62936	0.380003	0.580112
TKVG1_11520	TKV_RS11130		D-alanine--D-alanine ligase family protein	132.83	107.88	113.14	116.42	117.568	10.7659	54.41	63.68	38.65	52.2467	12.6545	-1.15879	0.000180558
TKVG1_11515	TKV_RS11125		DUF1934 domain-containing protein	393.89	353.24	410.9	401.66	389.923	25.4242	197.29	264.1	123.28	194.89	70.4407	-0.967343	0.0166738
TKVG1_11510	TKV_RS11120	argS	arginine--tRNA ligase	337.16	307.19	313.13	339.41	324.223	16.4437	245.34	203.49	152.9	200.577	46.2888	-0.747509	0.00424421
TKVG1_11505	TKV_RS11115		MBL fold metallo-hydrolase	655.95	718.25	527.66	702.91	651.192	86.5146	723.25	739.34	436.03	632.873	170.661	-0.097563	0.792474
TKVG1_11500	TKV_RS11110		hypothetical protein	59.93	71.61	58.39	49.87	59.95	8.9442	97.05	79.61	90.02	88.8933	8.77442	0.477915	0.0838101
TKVG1_11495	TKV_RS11105		ABC transporter ATP-binding protein	14.16	11.29	12.79	8.99	11.8075	2.21402	35.94	12.01	30.83	26.26	12.6026	0.90641	0.0627241
TKVG1_11490	TKV_RS11100		ABC transporter permease	16.18	14.68	14.79	10.5	14.0375	2.45515	27.04	11.72	38.46	25.74	13.4173	0.678782	0.189462
TKVG1_11485	TKV_RS11095		ABC transporter permease	9.07	20.95	16.18	9.75	13.9875	5.63979	21.53	13.39	23.64	19.52	5.41255	0.34031	0.517544
TKVG1_11480	TKV_RS11090		transposase	24.64	29	19.62	11.76	21.255	7.39981	21.51	18.64	13.69	17.9467	3.95584	-0.277312	0.572434
TKVG1_11475	TKV_RS11085		MFS transporter	22.72	24.13	24.23	21.07	23.0375	1.48183	73.95	34.1	63.49	57.18	20.6608	1.11897	0.00243886
TKVG1_11470	TKV_RS11080		hydrolase	144.56	137.45	114.6	133.09	132.425	12.7891	195.93	150.09	187.93	177.983	24.4853	0.349972	0.126235
TKVG1_11465	TKV_RS11075		aldo/keto reductase	299.76	258.67	183.53	314.49	264.113	58.685	487.64	216.55	385.96	363.383	136.948	0.349781	0.357804
TKVG1_11460	TKV_RS11070		SH3 domain-containing protein	29.72	20.03	8.07	19.19	19.2525	8.85485	151.8	14.11	136.44	100.783	75.4532	1.63425	0.00926343
TKVG1_11455	TKV_RS14010			7.3	8.1	3.16	3.14	5.425	2.64718	63.34	1.87	42.64	35.95	31.2763	1.57371	0.0209914
TKVG1_11450	TKV_RS11050		methylated-DNA--[protein]-cysteine S-methyltransferase	25.05	22.1	17.18	17.54	20.4675	3.7878	62.84	13.53	39.81	38.7267	24.6728	0.665275	0.221463
TKVG1_11445	TKV_RS11045		hypothetical protein	12.7	7.85	21.58	7.7	12.4575	6.51004	47.39	0	23.29	23.56	23.6962	0.370549	0.636031
TKVG1_11440	TKV_RS11040		MarR family transcriptional regulator	21.65	24.83	17.86	14.21	19.6375	4.60541	37.07	13.6	15.18	21.95	13.1181	0.0379466	0.954677
TKVG1_11435	TKV_RS11035		ABC transporter ATP-binding protein	26.56	21.32	22.39	17.21	21.87	3.84207	27.44	10.55	17.37	18.4533	8.49695	-0.324302	0.446482
TKVG1_11430	TKV_RS11030		ABC transporter ATP-binding protein	35.41	30.39	36.68	40.27	35.6875	4.08758	51.27	19.59	18.04	29.6333	18.7539	-0.365108	0.43744
TKVG1_11425	TKV_RS11025	thiT	energy-coupled thiamine transporter ThiT	400.23	444.67	450.3	484.29	444.873	34.5263	380.5	469.35	274.16	374.67	97.7255	-0.291945	0.442237
TKVG1_11420	TKV_RS11020		phosphatase PAP2 family protein	110.11	122.59	81.37	127.01	110.27	20.5527	138.73	101.83	117.84	119.467	18.5037	0.0476005	0.884205
TKVG1_11415	TKV_RS11010	mgtA	magnesium-translocating P-type ATPase	117.14	102.63	58.64	130.22	102.157	31.1233	169.41	66.15	110.51	115.357	51.8003	0.0790129	0.876807
TKVG1_11410	TKV_RS11005		LuxR C-terminal-related transcriptional regulator	9.98	4.84	6.82	5.15	6.6975	2.35477	17.88	4.86	11.97	11.57	6.51921	0.545988	0.357811
TKVG1_11405	TKV_RS11000		hypothetical protein	111.19	149.8	91.36	129.23	120.395	24.9698	183.19	262.88	130.34	192.137	66.7214	0.578423	0.162815
TKVG1_11400	TKV_RS13045		hypothetical protein	53.46	78.16	37.56	41.83	52.7525	18.2223	38.99	152.17	47.59	79.5833	63.0088	0.474856	0.445734
TKVG1_11395	TKV_RS10990		hypothetical protein	819.01	947.56	645.68	630.57	760.705	151.085	817.57	1594.87	727.27	1046.57	476.983	0.389547	0.408806
TKVG1_11390	TKV_RS10985		hypothetical protein	128.62	138.58	79.51	89.94	109.163	28.8257	161.03	267.9	143.24	190.723	67.4263	0.704089	0.103387
TKVG1_11385	TKV_RS10980		hypothetical protein	84.79	96.67	38.75	80.75	75.24	25.2476	134.89	212.62	98.34	148.617	58.3635	0.839585	0.080747
TKVG1_11380	TKV_RS10975		hypothetical protein	74.37	57.55	30.99	40.49	50.85	19.1471	90.11	60.67	75.84	75.54	14.7223	0.467482	0.269977
TKVG1_11375			IS3 family transposase	56.39	47.31	42.43	53.99	50.03	6.35845	92.87	48.63	89.9	77.1333	24.7292	0.51292	0.13735
TKVG1_11370	TKV_RS10960		hypothetical protein	10.58	14.39	8.3	10.27	10.885	2.54549	55.22	7.17	52.9	38.43	27.0968	1.27279	0.0411872
TKVG1_11365	TKV_RS14005			149.84	148.89	110.02	143.14	137.972	18.8686	136.35	136.46	104.11	125.64	18.6456	-0.186399	0.480931
TKVG1_11360	TKV_RS10950		hypothetical protein	171.78	224.19	140.63	159.21	173.953	35.8527	238.17	321.61	157.33	239.037	82.1434	0.379365	0.364573
TKVG1_11355	TKV_RS10945		hypothetical protein	204.16	185.95	111.59	166.69	167.098	40.0429	223.49	245.86	104.34	191.23	76.0757	0.12677	0.803257
TKVG1_11350	TKV_RS10940		hypothetical protein	117.32	165.6	110.8	115.61	127.332	25.6606	202.18	260.65	106.27	189.7	77.943	0.464335	0.312048
TKVG1_11345	TKV_RS10935		hypothetical protein	39.92	37.05	23.58	23.37	30.98	8.7453	42.07	40.59	34	38.8867	4.29619	0.23535	0.57856
TKVG1_11340	TKV_RS10930		hypothetical protein	24.74	26.74	19.45	30.82	25.4375	4.72597	27.77	42.74	23.24	31.25	10.2052	0.225977	0.640543
TKVG1_11335	TKV_RS10925		helix-turn-helix transcriptional regulator	18.62	14.68	10.35	21.26	16.2275	4.7606	37.58	28.34	14.05	26.6567	11.855	0.518292	0.370176
TKVG1_11330	TKV_RS10920		hypothetical protein	86.65	116.53	57.63	90.26	87.7675	24.104	79.32	246.58	166.38	164.093	83.6534	0.773123	0.141613
TKVG1_11325	TKV_RS10915		YdcF family protein	60.87	62.4	49.19	49.82	55.57	7.03576	40.4	135.58	122.95	99.6433	51.6934	0.699644	0.202262
TKVG1_11320	TKV_RS10910	sigY	RNA polymerase sigma factor SigY	16.46	9.23	4.88	4.81	8.845	5.48145	25.29	36.64	70.07	44	23.2796	1.77845	0.00225265
TKVG1_11315	TKV_RS10905		hypothetical protein	1.4	5.87	6.21	8.29	5.4425	2.89953	12.12	24.13	39.34	25.1967	13.6413	1.50114	0.0190926
TKVG1_11310	TKV_RS10900		zinc ribbon domain-containing protein	0.44	5.52	1.94	7.67	3.8925	3.299	9.11	25.19	40.91	25.07	15.9003	1.62265	0.0158459
TKVG1_11305	TKV_RS10895		PLDc N-terminal domain-containing protein	3.52	0.74	0.78	5.81	2.7125	2.44076	9.07	23.5	43.87	25.48	17.4843	1.76425	0.00852111
TKVG1_11300	TKV_RS10890		ABC transporter ATP-binding protein	4.4	3.14	5.76	5.35	4.6625	1.16391	9.97	24.07	41.4	25.1467	15.7426	1.78759	0.00269038
TKVG1_11295	TKV_RS10885		ABC transporter permease	4.29	4.1	1.3	2.82	3.1275	1.38221	7.34	18.86	19.81	15.3367	6.94159	1.72839	0.00340338
TKVG1_11290	TKV_RS10880	polX	DNA polymerase/3'-5' exonuclease PolX	44.04	26.81	36.28	27.54	33.6675	8.14423	111.43	26.63	104.84	80.9667	47.1722	0.953022	0.0767587
TKVG1_11285	TKV_RS10875	nfnB		1522.99	1146.25	871.83	1067.24	1152.08	272.853	1618.51	886.13	1054.23	1186.29	383.634	-0.0385163	0.920001
TKVG1_11280	TKV_RS10870	nfnA	NAD+-dependent NADPH:Fd oxidoreductase, NfnA subunit	1413.99	1038.06	751.92	1007.99	1052.99	272.771	1336.39	784.68	1015.53	1045.53	277.076	-0.0777279	0.824916
TKVG1_11275	TKV_RS10865		NADP-dependent isopropanol dehydrogenase	4034.22	3781	3382.81	3395.45	3648.37	316.734	3096.22	2784.51	2316.56	2732.43	392.43	-0.47542	0.0317278
TKVG1_11270			IS30 family transposase	13.39	12.02	8.68	7.48	10.3925	2.77183	30.98	35.99	45.18	37.3833	7.20181	1.63323	9.48049e-06
TKVG1_11265	TKV_RS10855	argC	N-acetyl-gamma-glutamyl-phosphate reductase	852.46	422.16	535.7	852.58	665.725	220.617	750.92	727.18	1381.86	953.32	371.316	0.418536	0.389105
TKVG1_11260	TKV_RS10850	argJ	bifunctional glutamate N-acetyltransferase/amino-acid acetyltransferase ArgJ	754.45	411.14	627.86	782	643.863	169.044	814.26	671.91	1419.69	968.62	397.069	0.464805	0.341545
TKVG1_11255	TKV_RS10845	argB	acetylglutamate kinase	652.15	314.19	478.49	674.51	529.835	168.356	631.27	586.14	1093.06	770.157	280.551	0.427413	0.379583
TKVG1_11250	TKV_RS10840		acetylornithine transaminase	675.36	324.41	504.76	739.84	561.092	186.369	598.97	568.89	941.92	703.26	207.232	0.239905	0.636046
TKVG1_11245	TKV_RS10835	carA	glutamine-hydrolyzing carbamoyl-phosphate synthase small subunit	828.97	407.83	628.61	908.22	693.408	223.812	705.46	760.22	1046.56	837.413	183.184	0.196899	0.690979
TKVG1_11240	TKV_RS10830	carB	carbamoyl-phosphate synthase (glutamine-hydrolyzing) large subunit	947.14	449.87	718.68	1029.55	786.31	259.999	715.94	885.89	941.81	847.88	117.635	0.0534344	0.926125
TKVG1_11235	TKV_RS10825		argininosuccinate synthase	847.62	430.36	698.4	955.69	733.018	227.682	710.43	836.5	865.57	804.167	82.4693	0.0699489	0.895111
TKVG1_11230	TKV_RS10820	argH	argininosuccinate lyase	296.15	147.05	191.7	285.28	230.045	72.5242	197.55	234.6	225.67	219.273	19.3356	-0.104507	0.825943
TKVG1_11225	TKV_RS10815			3.85	7.07	0.53	12.39	5.96	5.05021	5.72	2.77	7.73	5.40667	2.4948	-0.114794	0.894934
TKVG1_11220	TKV_RS14000			15.6	12.03	4.05	6.97	9.6625	5.15133	19.59	10.18	7.32	12.3633	6.41977	0.194611	0.783367
TKVG1_11215	TKV_RS10810		hypothetical protein	12.53	13.17	10.44	3.23	9.8425	4.55986	4.66	9.02	14.18	9.28667	4.7656	-0.0724489	0.934078
TKVG1_11210	TKV_RS10805			11.59	13.67	12.09	12.44	12.4475	0.886505	19.22	10.35	13.08	14.2167	4.54293	0.095797	0.824916
TKVG1_11205	TKV_RS10800		ABC transporter ATP-binding protein	11.84	8.07	6.67	11.01	9.3975	2.43362	7.28	5.76	5.37	6.13667	1.00917	-0.603701	0.207215
TKVG1_11200	TKV_RS10795		ABC-2 transporter permease	7.65	3.68	12.15	4.51	6.9975	3.83699	6.07	3.53	7.48	5.69333	2.00176	-0.304061	0.663138
TKVG1_11195	TKV_RS10790		hypothetical protein	16.64	21.29	17.88	10.87	16.67	4.3378	19.25	50.8	30.97	33.6733	15.9478	0.826713	0.124518
TKVG1_11190	TKV_RS10785		PIN domain nuclease	99.28	79.04	77.47	114.83	92.655	17.8099	68.39	142.51	44.79	85.23	50.9901	-0.125355	0.839145
TKVG1_11185	TKV_RS10780		type II toxin-antitoxin system VapB family antitoxin	114.48	135.58	129.63	82.96	115.662	23.5418	52.44	162.73	65.59	93.5867	60.2398	-0.263999	0.670353
TKVG1_11180	TKV_RS13660		hypothetical protein	7.87	1.84	15.55	4.51	7.4425	5.94143	16.48	9.07	7.92	11.1567	4.64586	0.273787	0.723333
TKVG1_11175	TKV_RS10770		hypothetical protein	2.56	4.48	5.68	3.07	3.9475	1.41189	3.38	4.9	8.99	5.75667	2.90145	0.314135	0.678806
TKVG1_11170	TKV_RS10765		C39 family peptidase	4.41	5.9	3.12	10.76	6.0475	3.34071	12.73	8.78	18.97	13.4933	5.13771	0.81625	0.191482
TKVG1_11165	TKV_RS10760		hypothetical protein	18.35	9.96	9.21	6.72	11.06	5.05345	23.48	17.05	34.54	25.0233	8.84655	0.866607	0.140793
TKVG1_11160	TKV_RS10755		Spi family protease inhibitor	2.31	6.48	14.98	2.38	6.5375	5.95639	15.28	9.76	17.83	14.29	4.12508	0.615072	0.384565
TKVG1_11155	TKV_RS10750		IS1634 family transposase	103.53	96.11	129.43	77.77	101.71	21.418	247.52	104.02	294.51	215.35	99.236	0.844127	0.0821004
TKVG1_11150	TKV_RS10745		desulfoferrodoxin	1776.59	2129.58	3290.66	2241.05	2359.47	651.597	1906.37	2078.95	2862.94	2282.75	509.812	-0.118192	0.825349
TKVG1_11145	TKV_RS10740		response regulator transcription factor	54.03	51.03	57.7	47.03	52.4475	4.52591	93.32	52.51	59.87	68.5667	21.7506	0.266261	0.450564
TKVG1_11140	TKV_RS10735		HAMP domain-containing sensor histidine kinase	32.61	41.44	34.75	36.02	36.205	3.763	80.57	63.76	57.27	67.2	12.0249	0.778059	0.00363206
TKVG1_11135			ISLre2 family transposase	126.14	138.48	113.08	124.87	125.642	10.3837	238.99	185.78	222.43	215.733	27.2298	0.693254	0.000386308
TKVG1_11130	TKV_RS10730		aspartate ammonia-lyase	79.34	77.57	62.61	79.51	74.7575	8.1457	46.91	52.84	47.07	48.94	3.37845	-0.638846	0.0156114
TKVG1_11125	TKV_RS10725	hydF	[FeFe] hydrogenase H-cluster maturation GTPase HydF	158.7	142.74	126.75	138.96	141.787	13.179	165.33	128.5	124.04	139.29	22.6613	-0.0990081	0.656173
TKVG1_11120	TKV_RS10720		MFS transporter	245.67	263.44	260.71	232.43	250.562	14.3936	288.76	218.1	218.12	241.66	40.7898	-0.135344	0.621313
TKVG1_11115	TKV_RS10715		tetratricopeptide repeat protein	309.86	330.49	257.07	258.36	288.945	37.0355	355.86	247.34	240.68	281.293	64.6624	-0.117561	0.638244
TKVG1_11110	TKV_RS10710	mazG	nucleoside triphosphate pyrophosphohydrolase	88.58	88.59	45.68	98.43	80.32	23.5551	161.85	62	93.72	105.857	51.0194	0.275585	0.535857
TKVG1_11105	TKV_RS10705		HU family DNA-binding protein	1234.26	1320.73	661.42	1582.8	1199.8	388.31	1315.65	1238.57	882.06	1145.43	231.315	-0.10509	0.81251
TKVG1_11100	TKV_RS10700		RNA-binding S4 domain-containing protein	62.76	34.23	11.84	49.46	39.5725	21.856	103.3	40.91	60.74	68.3167	31.8776	0.568478	0.335722
TKVG1_11095	TKV_RS10695		SpoIID/LytB domain-containing protein	55.52	144.36	37.12	58.19	73.7975	47.9651	81.09	159.36	104.52	114.99	40.1717	0.529486	0.359207
TKVG1_11090	TKV_RS10690	yabP	sporulation protein YabP	7.85	6.19	2.72	3.03	4.9475	2.49044	25.76	7.91	62.14	31.9367	27.6376	1.69329	0.0101909
TKVG1_11085	TKV_RS10685		MtnX-like HAD-IB family phosphatase	71.62	68.2	68.7	65.57	68.5225	2.47974	153.88	44.63	128.09	108.867	57.1055	0.487186	0.316122
TKVG1_11080	TKV_RS10680		putative manganese-dependent inorganic diphosphatase	262.14	229.79	199.98	227.23	229.785	25.4409	372.25	168.35	297.81	279.47	103.18	0.177725	0.622748
TKVG1_11075	TKV_RS10675	yabQ	spore cortex biosynthesis protein YabQ	87.63	81.2	49.2	69.29	71.83	16.8919	151.04	54.51	88.44	97.9967	48.9695	0.318643	0.459161
TKVG1_11070	TKV_RS10670		septum formation initiator family protein	32.53	63.28	33.99	50.58	45.095	14.6285	46.2	97.85	62.01	68.6867	26.4644	0.493906	0.354829
TKVG1_11065	TKV_RS10665		S1 domain-containing RNA-binding protein	1041.52	916.05	495.84	876.84	832.562	235.213	1581.37	537.31	1364.03	1160.9	550.873	0.356677	0.447678
TKVG1_11060	TKV_RS10660		Ppx/GppA phosphatase family protein	482.9	349.62	182.73	321.67	334.23	123.085	1066.13	199.58	1033.93	766.547	491.271	0.893459	0.121908
TKVG1_11040	TKV_RS10640		helix-turn-helix transcriptional regulator	428.4	289.83	192.72	278.28	297.308	97.5393	762.69	269.74	697.73	576.72	267.829	0.777052	0.0908049
TKVG1_11035	TKV_RS10635		hypothetical protein	9.13	10.03	2.77	6.42	7.0875	3.26172	88.44	12.9	64.27	55.2033	38.5775	2.03945	0.000617897
TKVG1_11030	TKV_RS10630		hypothetical protein	9.78	7.52	5.85	6.6	7.4375	1.70447	77.97	16.04	78.35	57.4533	35.8655	2.16795	5.48869e-05
TKVG1_11025	TKV_RS13995			4.13	6.51	9.18	6.39	6.5525	2.06563	67.58	16.65	67.53	50.5867	29.39	1.91828	0.00293247
TKVG1_11020	TKV_RS10620			12.06	12.18	9.2	7.8	10.31	2.1673	18.75	12.53	12.37	14.55	3.63819	0.387028	0.326915
TKVG1_11015	TKV_RS10615		hypothetical protein	4.46	8.07	2.2	7.92	5.6625	2.84765	8.35	14.83	4.98	9.38667	5.00616	0.487769	0.460029
TKVG1_11010	TKV_RS10610			9.88	9.68	5.38	9.7	8.66	2.18852	13.06	6.7	11.5	10.42	3.31469	0.17439	0.707955
TKVG1_11005	TKV_RS10605		RAMP superfamily CRISPR-associated protein	0	0	0	0	0	0	0.38	0	0.39	0.256667	0.222336	0.128761	0.756125
TKVG1_11000	TKV_RS10600		CRISPR-associated protein Csx11	0	0.36	0.19	0.17	0.18	0.147196	0.84	0.78	1.19	0.936667	0.221435	1.11298	0.121519
TKVG1_10995	TKV_RS10595		hypothetical protein	0.91	0.96	0	0.47	0.585	0.447847	2.37	2.36	0.46	1.73	1.09986	0.812976	0.267748
TKVG1_10990	TKV_RS10590		RAMP superfamily CRISPR-associated protein	1.9	1.99	1.64	1.52	1.7625	0.21945	1.77	2.43	0.42	1.54	1.02455	-0.16906	0.825794
TKVG1_10985	TKV_RS10585		hypothetical protein	2.1	0.55	0.29	2.44	1.345	1.0823	1.56	1.21	0	0.923333	0.818556	-0.317423	0.682294
TKVG1_10980	TKV_RS10580		hypothetical protein	1.9	3.69	2.44	3.77	2.95	0.927829	7.68	7.07	3.53	6.09333	2.24077	0.738283	0.20104
TKVG1_10975	TKV_RS10575		hypothetical protein	6.1	6.72	3.23	4.8	5.2125	1.54496	8.36	4.02	5.85	6.07667	2.17886	0.118195	0.868399
TKVG1_10970	TKV_RS10570		DUF4160 domain-containing protein	160.26	167.24	124.79	206.33	164.655	33.4266	144.96	162.35	131.77	146.36	15.338	-0.208237	0.563272
TKVG1_10965	TKV_RS10565		DUF2442 domain-containing protein	85.67	61.24	54.58	80.71	70.55	14.984	65.11	81.57	47.1	64.5933	17.2408	-0.165695	0.724444
TKVG1_10960	TKV_RS13855			115.97	85.05	88.41	116.15	101.395	16.9893	79.54	100.18	75.95	85.2233	13.0766	-0.27909	0.485771
TKVG1_10955	TKV_RS13165		hypothetical protein	87.38	69.4	86.31	70.1	78.2975	9.8836	26.95	51.44	31.25	36.5467	13.076	-0.993402	0.0441818
TKVG1_10950	TKV_RS12560			175.01	194.68	183.81	181.75	183.812	8.16171	137.85	149.79	107.3	131.647	21.9137	-0.520152	0.118139
TKVG1_10945	TKV_RS13645			380.11	463.63	633.57	400.6	469.477	115.023	273.4	422.31	245.17	313.627	95.175	-0.573152	0.233038
TKVG1_10940	TKV_RS10555			209.5	189.72	307.79	185.03	223.01	57.5062	159.2	160.77	134.43	151.467	14.7751	-0.595503	0.150662
TKVG1_10935	TKV_RS12555		metalloregulator ArsR/SmtB family transcription factor	119.94	150.09	135.26	74.38	119.917	32.7589	147.21	101.13	124.94	124.427	23.0443	-0.0330487	0.948981
TKVG1_10930	TKV_RS10545		ABC transporter ATP-binding protein	135.42	171.9	148.81	126.04	145.542	19.9015	163.16	121.69	181.25	155.367	30.5352	0.0189475	0.965154
TKVG1_10925	TKV_RS10540		ABC transporter permease	218.96	239.96	168.22	181.7	202.21	33.0737	241.81	162.72	268.45	224.327	54.9905	0.0832464	0.81622
TKVG1_10920	TKV_RS12550			170.37	161.76	91.61	233.84	164.395	58.2034	263.56	179.6	330.96	258.04	75.8308	0.542884	0.226128
TKVG1_10915	TKV_RS13640		hypothetical protein	144.61	119.44	107.89	215.22	146.79	48.1271	240.64	148.7	310.62	233.32	81.2078	0.540792	0.248269
TKVG1_10910	TKV_RS10535		ATP-binding protein	113.21	114.13	92.89	105.76	106.497	9.81531	145.58	95.82	81.85	107.75	33.4981	-0.0698507	0.821753
TKVG1_10905	TKV_RS10530		hypothetical protein	1.06	2.22	2.35	3.81	2.36	1.12727	5.75	0	5.84	3.86333	3.34605	0.311591	0.695489
TKVG1_10900	TKV_RS10525			127.44	142.59	171.75	113.77	138.887	24.8702	188.62	152.52	196.74	179.293	23.5392	0.259172	0.507083
TKVG1_10895	TKV_RS12545			204.87	179.63	181.26	154.23	179.998	20.6909	241.6	207.99	245.11	231.567	20.4933	0.2818	0.388731
TKVG1_10890	TKV_RS10515		IS607 family transposase	185.32	152.84	141.85	156.83	159.21	18.5233	261.4	158.65	198.03	206.027	51.8397	0.279149	0.288138
TKVG1_10885	TKV_RS13990		HEPN domain-containing protein	58.4	43.74	36.1	51.96	47.55	9.70892	115.79	46.24	100.59	87.54	36.5654	0.715165	0.0918679
TKVG1_10880	TKV_RS10505		folate family ECF transporter S component	210.28	162.14	100.49	206.59	169.875	51.1686	421.32	129.08	400.1	316.833	162.945	0.706895	0.15401
TKVG1_10875	TKV_RS13040		hypothetical protein	0	0	0	0	0	0	0	0	0	0	0		NA
TKVG1_10870	TKV_RS13985		hypothetical protein	0	0	0	0	0	0	1.62	0	0	0.54	0.935307	0.120743	0.765717
TKVG1_10865	TKV_RS10495			0.89	0.93	0	1.83	0.9125	0.747278	1.32	1.02	1.79	1.37667	0.388115	0.256925	0.753879
TKVG1_10860	TKV_RS10490		phage holin	0	1.98	0	0	0.495	0.99	4.67	2.17	2.84	3.22667	1.29408	0.823652	0.229228
TKVG1_10855	TKV_RS10485		DUF4914 family protein	1558.63	1492.41	639.6	1746.7	1359.34	491.765	1495.81	760.02	646.3	967.377	461.156	-0.50874	0.271272
TKVG1_10850	TKV_RS10480		solute carrier family 23 protein	1190.54	864.07	1359.39	978.58	1098.14	220.509	738.74	411.33	171.47	440.513	284.759	-1.23205	0.0154665
TKVG1_10845	TKV_RS10475			23.36	51.58	36.35	29.32	35.1525	12.1707	38.22	102.7	58.36	66.4267	32.9882	0.737605	0.183876
TKVG1_10840	TKV_RS10470	pfor2	pyruvate:ferredoxin (flavodoxin) oxidoreductase	4.97	8.37	3.69	3.85	5.22	2.17584	25.81	19	16.68	20.4967	4.74544	1.73867	4.101e-07
TKVG1_10835	TKV_RS12540		DUF3787 domain-containing protein	16.18	13.23	4	14.84	12.0625	5.50864	65.95	24.85	47.02	45.94	20.5713	1.4312	0.0142801
TKVG1_10830	TKV_RS10465		DUF1284 domain-containing protein	41.71	28.73	23.18	20.77	28.5975	9.35547	93.05	43.07	90.06	75.3933	28.0327	1.17477	0.00765717
TKVG1_10825	TKV_RS10460		ABC transporter permease	331.2	377.85	291.72	345.64	336.602	35.7149	508.94	500.68	359.65	456.423	83.9099	0.360414	0.18624
TKVG1_10820	TKV_RS10455		ABC transporter ATP-binding protein	380.15	435.21	345.18	444.69	401.308	47.0084	647.72	600.91	396.45	548.36	133.624	0.360782	0.238292
TKVG1_10815	TKV_RS10450		DUF2275 domain-containing protein	506.35	620.71	449.31	563.67	535.01	73.783	878.51	828.11	511.67	739.43	198.849	0.376717	0.243138
TKVG1_10810	TKV_RS10445		RNA polymerase sigma factor SigX	231.11	233.16	143.1	251.57	214.735	48.6347	391.64	240.39	230.39	287.473	90.3494	0.323472	0.316252
TKVG1_10805	TKV_RS10440		DMT family transporter	22.88	21.45	11.68	15.31	17.83	5.25293	44.45	17.45	14.93	25.61	16.3645	0.360198	0.47813
TKVG1_10800	TKV_RS10435		class I SAM-dependent methyltransferase	79.99	69.59	89.5	60.32	74.85	12.6469	130.71	47.65	100.98	93.1133	42.0851	0.172304	0.735245
TKVG1_10790	TKV_RS10425	spoIIE	stage II sporulation protein E	22.44	10.82	5.24	13.05	12.8875	7.16555	69.95	13.57	37.48	40.3333	28.2981	1.21163	0.0380942
TKVG1_10785	TKV_RS10420		vWA domain-containing protein	2.48	5.21	2.2	2.55	3.11	1.40814	11.79	0	1.74	4.51	6.36441	0.190676	0.818019
TKVG1_10780	TKV_RS10415	tilS	tRNA lysidine(34) synthetase TilS	205.61	168.77	153.84	195.61	180.958	23.8491	288.97	134.48	173.5	198.983	80.3358	0.0318215	0.936307
TKVG1_10775	TKV_RS10410	hpt	hypoxanthine phosphoribosyltransferase	305.42	256.84	222.6	288.07	268.233	36.4625	425.47	185.55	218.38	276.467	130.081	-0.0618294	0.884205
TKVG1_10770	TKV_RS10405	ftsH	ATP-dependent zinc metalloprotease FtsH	439.38	340.71	232	410.75	355.71	92.3025	856.46	263.3	472.71	530.823	300.82	0.419426	0.360964
TKVG1_10765	TKV_RS10400		PAS domain-containing sensor histidine kinase	363.58	378.43	256.65	410.35	352.252	66.6552	469.6	421.88	275.63	389.037	101.07	0.0749317	0.839145
TKVG1_10760	TKV_RS10395		hypothetical protein	1352.15	1389.58	1023.19	1585.98	1337.72	233.424	1647.36	1513.29	945.31	1368.65	372.704	-0.032209	0.936307
TKVG1_10755	TKV_RS13980			46.31	26.81	13.42	42.23	32.1925	15.0713	55.89	34.01	39.15	43.0167	11.441	0.286792	0.613718
TKVG1_10750	TKV_RS10390		cobalamin-dependent protein	28.32	15.8	10.28	39.94	23.585	13.2607	33.23	17.31	27.9	26.1467	8.10353	0.0517287	0.942778
TKVG1_10745	TKV_RS10385		carboxyl transferase domain-containing protein	260.01	253.38	117.39	293.48	231.065	77.7891	243.99	136.48	145.25	175.24	59.7005	-0.430309	0.290859
TKVG1_10740	TKV_RS10380		sodium pump decarboxylase subunit gamma	357.96	298.2	146.89	403.01	301.515	111.665	336.89	183.9	177.07	232.62	90.365	-0.399456	0.372792
TKVG1_10735	TKV_RS10375		DUF2118 domain-containing protein	347.13	324.61	133.44	384.41	297.398	112.052	358.96	179.51	185.03	241.167	102.049	-0.336372	0.472188
TKVG1_10730	TKV_RS10370		ECF transporter S component	3272.23	2906.22	2542.78	2562.92	2821.04	343.939	2364.79	2307.32	1979.97	2217.36	207.584	-0.397253	0.0896673
TKVG1_10725	TKV_RS10365		type III pantothenate kinase	1650.98	1358.53	1094.08	1267.33	1342.73	232.938	1279.31	1094.22	794.38	1055.97	244.717	-0.398387	0.147951
TKVG1_10720	TKV_RS10360		endospore germination permease	25.06	17.65	5.54	13.4	15.4125	8.15674	58.53	27.05	51.73	45.77	16.5647	1.27916	0.01219
TKVG1_10715	TKV_RS10355		spore germination protein	9.48	7.58	6.53	4.11	6.925	2.23885	39.57	15.94	25.75	27.0867	11.8716	1.64426	8.20547e-05
TKVG1_10710	TKV_RS10350		Ger(x)C family spore germination protein	7.5	8.79	5.74	6.97	7.25	1.26394	33.63	10.19	21.76	21.86	11.7203	1.28471	0.00532387
TKVG1_10705	TKV_RS10345		hypothetical protein	11	20.41	18.7	9.35	14.865	5.50175	24.38	26.84	23.44	24.8867	1.75571	0.532616	0.361051
TKVG1_10700	TKV_RS10340		IS30 family transposase	8.37	12.61	5.27	12.37	9.655	3.51106	36.23	30.85	47	38.0267	8.22354	1.7286	7.23314e-06
TKVG1_10695	TKV_RS10335		helix-turn-helix transcriptional regulator	34.95	38.49	31.75	47.79	38.245	6.93323	28.6	12.46	8.37	16.4767	10.6964	-1.14596	0.0155465
TKVG1_10690	TKV_RS10330		hypothetical protein	86.32	70.3	71.45	62.34	72.6025	10.002	62.95	25.18	10.99	33.04	26.8569	-1.05402	0.051011
TKVG1_10685	TKV_RS10325		NAD(P)H-binding protein	175.6	124.56	107.15	112.98	130.072	31.2022	112.83	101.81	42.77	85.8033	37.6731	-0.601331	0.177177
TKVG1_10680	TKV_RS10320	greA	transcription elongation factor GreA	964.8	757.41	462.63	779.96	741.2	207.656	1201.04	327.33	981.17	836.513	454.463	0.0747987	0.899822
TKVG1_10675	TKV_RS10315	lysS	lysine--tRNA ligase	790.64	515.12	435.12	559.34	575.055	152.641	1417.73	360.3	1002.99	927.007	532.794	0.504561	0.316122
TKVG1_10670	TKV_RS10310	folE	GTP cyclohydrolase I FolE	620.32	487.1	447.26	554.8	527.37	76.2264	1120.67	330.44	881.98	777.697	405.305	0.402555	0.384565
TKVG1_10665	TKV_RS10305	folP	dihydropteroate synthase	293.79	217.31	197.87	207.51	229.12	43.8377	377.91	144.83	271.16	264.633	116.677	0.0985182	0.827391
TKVG1_10660	TKV_RS10300	folK	2-amino-4-hydroxy-6-hydroxymethyldihydropteridine diphosphokinase	500.88	322.39	366.63	396.1	396.5	75.8943	618.45	247.42	404.35	423.407	186.248	-0.014404	0.980839
TKVG1_10655	TKV_RS10295	queD	6-carboxytetrahydropterin synthase QueD	558.29	412.86	368.77	494.59	458.627	84.4491	647.35	326.31	434.64	469.433	163.324	-0.0552739	0.884205
TKVG1_10650	TKV_RS10290	sfsA	DNA/RNA nuclease SfsA	544.42	395.27	348.24	395.01	420.735	85.3693	580.75	293.04	330.23	401.34	156.482	-0.155498	0.663018
TKVG1_10645	TKV_RS10285		N-acetylmuramoyl-L-alanine amidase	22.75	13.74	9.43	10.51	14.1075	6.04563	35.17	19.35	28.51	27.6767	7.94285	0.811202	0.0687156
TKVG1_10640	TKV_RS10280		coenzyme F420-0:L-glutamate ligase	28.36	20.03	19.16	17.78	21.3325	4.77571	48.35	18.29	53.16	39.9333	18.8973	0.714098	0.144812
TKVG1_10635	TKV_RS10275		hypothetical protein	58.4	65.08	57.85	65.32	61.6625	4.09209	140.2	90.76	121	117.32	24.9246	0.798664	0.0190015
TKVG1_10630	TKV_RS10270		DUF1614 domain-containing protein	129	151.9	133.22	135.41	137.382	10.0373	139.18	120.22	136.16	131.853	10.1873	-0.124923	0.664882
TKVG1_10625	TKV_RS12530		DUF896 domain-containing protein	79.21	57.08	18.45	74.45	57.2975	27.5895	71.56	52.97	53.97	59.5	10.4562	0.00636079	0.99265
TKVG1_10620	TKV_RS10265		aspartate aminotransferase family protein	98.73	83.3	56.55	93.1	82.92	18.7004	90.79	69.07	58.16	72.6733	16.6108	-0.246266	0.415915
TKVG1_10615	TKV_RS10260		thioredoxin family protein	40.16	36.54	20.98	32.77	32.6125	8.32126	40.7	30.37	29.84	33.6367	6.12276	-0.0137526	0.980817
TKVG1_10610	TKV_RS10255		vitamin B12-dependent ribonucleotide reductase	109.18	88.69	126.78	97.42	105.517	16.4746	155.68	78.61	144.14	126.143	41.5675	0.134431	0.76876
TKVG1_10605	TKV_RS10250		sensor domain-containing diguanylate cyclase	44.61	36.04	33.44	50.89	41.245	8.00748	108.91	71.73	95.54	92.06	18.8327	1.03285	0.00013378
TKVG1_10600	TKV_RS10245	ptsP	phosphoenolpyruvate--protein phosphotransferase	396.83	315.08	310.51	342.5	341.23	39.6674	304.02	207.87	179.31	230.4	65.3364	-0.632646	0.0150067
TKVG1_10595	TKV_RS10240	fusA	elongation factor G	28.76	52.38	64.07	33.63	44.71	16.4399	36.98	180.03	136.6	117.87	73.3412	1.03054	0.0949846
TKVG1_10590	TKV_RS10235		malic enzyme-like NAD(P)-binding protein	101.91	92.69	91.16	108.47	98.5575	8.13731	81.45	64.79	59.25	68.4967	11.5548	-0.584974	0.0155465
TKVG1_10585	TKV_RS10230		hypothetical protein	188.88	129.18	142.45	125.19	146.425	29.2492	120.32	97.85	151.82	123.33	27.1106	-0.28539	0.480931
TKVG1_10580	TKV_RS13035		hypothetical protein	260.84	232.67	207.55	286.02	246.77	34.037	283.87	190.48	197.79	224.047	51.9373	-0.21174	0.47813
TKVG1_10575	TKV_RS10225		CtsR family transcriptional regulator	331.69	286.44	310.1	346.97	318.8	26.3474	348.38	236.99	234.68	273.35	64.9882	-0.301958	0.273895
TKVG1_10570	TKV_RS10220		UvrB/UvrC motif-containing protein	254.03	275.34	222.37	271.34	255.77	24.1108	259.94	189.84	166.63	205.47	48.5789	-0.385109	0.116315
TKVG1_10565	TKV_RS10215		protein arginine kinase	272.72	257.56	250.21	272.47	263.24	11.2117	295.13	233.35	189.71	239.397	52.9695	-0.213856	0.408806
TKVG1_10560	TKV_RS10210		ATP-dependent Clp protease ATP-binding subunit	227.52	217.43	250.51	223.47	229.733	14.4588	193.57	159.18	121.56	158.103	36.0171	-0.602672	0.046664
TKVG1_10555	TKV_RS10205		iron dependent repressor, metal binding and dimerization domain protein	5.04	1.33	0	1.3	1.9175	2.17204	12.5	4.36	17.76	11.54	6.75139	1.46849	0.0356643
TKVG1_10550	TKV_RS10200		Nramp family divalent metal transporter	1.48	2.52	2.03	0.24	1.5675	0.981678	17.44	2.5	13.9	11.28	7.807	1.74008	0.00765717
TKVG1_10545	TKV_RS10195	radA	DNA repair protein RadA	149.43	143.8	113.74	115.9	130.718	18.5212	212.87	139.6	178.25	176.907	36.6535	0.350729	0.14197
TKVG1_10540	TKV_RS10190		hypothetical protein	1138.65	1299.77	1284.06	1117.96	1210.11	95.0538	1308.55	1463.88	1211.79	1328.07	127.174	0.0638462	0.858809
TKVG1_10535	TKV_RS10185		PIN/TRAM domain-containing protein	463.57	468.3	497.23	458.84	471.985	17.2674	520.11	503.21	383.71	469.01	74.3537	-0.0844154	0.800513
TKVG1_10530	TKV_RS10180	ispD	2-C-methyl-D-erythritol 4-phosphate cytidylyltransferase	139.89	124	100.79	135.29	124.993	17.4616	182.59	89.02	102.79	124.8	50.519	-0.093543	0.800234
TKVG1_10525	TKV_RS10175		alpha/beta hydrolase	97.21	80.3	66.16	79.15	80.705	12.7352	113.3	47.02	72	77.44	33.4732	-0.148671	0.705187
TKVG1_10520	TKV_RS10170	ispF	2-C-methyl-D-erythritol 2,4-cyclodiphosphate synthase	55.4	52.6	49.64	55.91	53.3875	2.8912	101.27	46.99	50.32	66.1933	30.4229	0.191598	0.640543
TKVG1_10515	TKV_RS10165		proline--tRNA ligase	209.55	153.99	157.12	182.09	175.688	25.8405	169.62	106.64	87.41	121.223	43.0015	-0.599053	0.055439
TKVG1_10510	TKV_RS10160		hypothetical protein	34.59	35.72	33.04	41.31	36.165	3.60163	60.16	69.89	43.94	57.9967	13.1096	0.541038	0.212151
TKVG1_10505	TKV_RS10155	gltX	glutamate--tRNA ligase	439.92	353.65	299.7	384.11	369.345	58.5821	499.69	260.69	387.8	382.727	119.581	-0.0327041	0.930675
TKVG1_10500	TKV_RS10150	cysE	serine O-acetyltransferase	359.07	215.16	164.75	191.95	232.733	86.7079	744.02	149.1	783.64	558.92	355.467	0.946186	0.0965651
TKVG1_10495	TKV_RS10145	cysS	cysteine--tRNA ligase	177.56	132.33	125.33	164.49	149.928	25.102	536.61	86.08	536.57	386.42	260.102	1.00092	0.0825071
TKVG1_10490	TKV_RS10140			282.09	252.54	226.49	274.48	258.9	24.9758	480.71	205.75	461.34	382.6	153.463	0.43673	0.269977
TKVG1_10485	TKV_RS10135	rlmB	23S rRNA (guanosine(2251)-2'-O)-methyltransferase RlmB	305.29	294.99	243.41	267.07	277.69	27.9819	522.55	219.56	475.17	405.76	162.985	0.422204	0.273261
TKVG1_10480	TKV_RS10130		NYN domain-containing protein	171.22	188.24	131.79	181.41	168.165	25.2383	300.29	131.91	287.99	240.063	93.8652	0.397954	0.316122
TKVG1_10475	TKV_RS10125	sigH	RNA polymerase sporulation sigma factor SigH	1560.5	1393.53	1074.39	1425.39	1363.45	205.853	1500	996.01	1398.03	1298.01	266.466	-0.135069	0.607994
TKVG1_10465	TKV_RS10115	tuf2	elongation factor Tu	735.35	566.57	463.58	709.04	618.635	127.211	650.02	310.37	471.95	477.447	169.892	-0.435543	0.193992
TKVG1_10460	TKV_RS10110	rpmG	50S ribosomal protein L33	3626.46	3043.56	2141.62	3050.56	2965.55	613.453	3417.02	1637.1	1793.89	2282.67	985.499	-0.444771	0.189462
TKVG1_10455	TKV_RS10105	secE	preprotein translocase subunit SecE	2959.16	2240	1763.03	2445.32	2351.88	495.574	2798.66	1119.93	1353.09	1757.23	909.411	-0.487962	0.206918
TKVG1_10450	TKV_RS10100	nusG	transcription termination/antitermination protein NusG	3497.6	2670.29	1995.36	3118.66	2820.48	645.699	3343.87	1486.62	1649.78	2160.09	1028.42	-0.451107	0.227682
TKVG1_10445	TKV_RS10095	rplK	50S ribosomal protein L11	2067.21	1621.08	1177.23	1971.03	1709.14	403.106	2044.89	838.68	911.43	1265	676.383	-0.495559	0.218232
TKVG1_10440	TKV_RS10090	rplA	50S ribosomal protein L1	2411.8	1680.53	1383.89	2213.7	1922.48	473.59	2396.77	965.27	1098.91	1486.98	790.727	-0.438705	0.28624
TKVG1_10435	TKV_RS10085	rplJ	50S ribosomal protein L10	1650.87	1155.39	927.37	1700.3	1358.48	378.345	1547.1	894.28	732.67	1058.02	431.198	-0.416125	0.285181
TKVG1_10430	TKV_RS10080	rplL	50S ribosomal protein L7/L12	627.64	409.88	325.38	650.18	503.27	160.641	501.13	260.48	227.47	329.693	149.383	-0.637485	0.12469
TKVG1_10425	TKV_RS10075	rpoB	DNA-directed RNA polymerase subunit beta	842.81	676.19	598.4	640.1	689.375	107.115	763	485.61	410.95	553.187	185.499	-0.391167	0.180036
TKVG1_10420	TKV_RS10070	rpoC	DNA-directed RNA polymerase subunit beta'	874.79	719.7	739.8	672.36	751.663	86.817	701.36	539.16	337.58	526.033	182.245	-0.57022	0.0965651
TKVG1_10415	TKV_RS10065		ribosomal L7Ae/L30e/S12e/Gadd45 family protein	1081.17	685.63	616.88	853.63	809.328	206.719	631.31	407.17	363.61	467.363	143.643	-0.82256	0.00964667
TKVG1_10410	TKV_RS10060	rpsL	30S ribosomal protein S12	1558.94	1318.67	974.03	1487.02	1334.66	260.656	1259.77	729.09	680.84	889.9	321.224	-0.639962	0.0344579
TKVG1_10405	TKV_RS10055	rpsG	30S ribosomal protein S7	1739.65	1284.25	993	1547.54	1391.11	324.48	1377.29	817.67	780.6	991.853	334.312	-0.542058	0.0837242
TKVG1_10400	TKV_RS10050	fusA	elongation factor G	1822.13	1291.34	985.48	1735.57	1458.63	391.869	1519	917.93	833.73	1090.22	373.713	-0.471067	0.171683
TKVG1_10395	TKV_RS10045	tuf1	elongation factor Tu	803.39	577.52	474.21	733.39	647.127	149.002	719.63	356.81	454.05	510.163	187.806	-0.408246	0.226506
TKVG1_10390	TKV_RS10040	rpsJ	30S ribosomal protein S10	1548.79	1044.42	795.56	1436.61	1206.35	348.929	1207.38	875.05	719.12	933.85	249.384	-0.411225	0.239328
TKVG1_10385	TKV_RS10035	rplC	50S ribosomal protein L3	1584.8	1224.53	946.21	1720.11	1368.91	350.937	1394.77	877.9	673.62	982.097	371.695	-0.525831	0.146921
TKVG1_10380	TKV_RS10030	rplD	50S ribosomal protein L4	1056.78	793.34	606.95	1054.23	877.825	218.826	854.66	617.19	402.88	624.91	225.989	-0.527432	0.153061
TKVG1_10375	TKV_RS10025	rplW	50S ribosomal protein L23	1041.28	750.9	559.82	1004.05	839.013	226.467	768.56	547.14	431.97	582.557	171.067	-0.560999	0.101955
TKVG1_10370	TKV_RS10020	rplB	50S ribosomal protein L2	1277.35	938.73	764.61	1244.07	1056.19	247	1006.13	691.2	516.39	737.907	248.188	-0.562541	0.0949846
TKVG1_10365	TKV_RS10015	rpsS	30S ribosomal protein S19	1425.42	1003.27	793.68	1378.13	1150.12	303.531	1022.96	837.49	508.52	789.657	260.534	-0.565856	0.135327
TKVG1_10360	TKV_RS10010	rplV	50S ribosomal protein L22	990.45	659.32	657.94	913.87	805.395	172.33	735.23	569.1	277.26	527.197	231.843	-0.631114	0.137122
TKVG1_10355	TKV_RS10005	rpsC	30S ribosomal protein S3	808.46	627.79	505.68	868.19	702.53	166.333	528.53	457.87	243.03	409.81	148.694	-0.77885	0.0443937
TKVG1_10350	TKV_RS10000	rplP	50S ribosomal protein L16	1203.3	855.23	691.99	1172.79	980.827	248.694	717.26	624.67	336.06	559.33	198.822	-0.80512	0.038705
TKVG1_10345	TKV_RS09995	rpmC	50S ribosomal protein L29	1457.15	1179.93	832.88	1438.52	1227.12	291.694	934.1	733.63	357.32	675.017	292.823	-0.848205	0.040621
TKVG1_10340	TKV_RS09990	rpsQ	30S ribosomal protein S17	1742.55	1269.2	913.9	1539.36	1366.25	358.519	1134.1	788.03	429.1	783.743	352.52	-0.799791	0.0526064
TKVG1_10335	TKV_RS09985	rplN	50S ribosomal protein L14	1656.12	1213.98	974.96	1529.12	1343.55	308.103	1176.57	942.32	452.94	857.277	369.235	-0.656765	0.119039
TKVG1_10330	TKV_RS09980	rplX	50S ribosomal protein L24	1460.91	1011.67	844.64	1317.25	1158.62	280.904	1023.59	773.97	400.11	732.557	313.796	-0.673681	0.102077
TKVG1_10325	TKV_RS09975	rplE	50S ribosomal protein L5	1163.25	911.81	726.32	1252.15	1013.38	239.577	864.69	638.82	345.02	616.177	260.574	-0.729986	0.070295
TKVG1_10320	TKV_RS09970		type Z 30S ribosomal protein S14	632.68	510.32	368.92	551.63	515.888	110.376	362.51	280.46	177.98	273.65	92.4533	-0.92159	0.00645236
TKVG1_10315	TKV_RS09965	rpsH	30S ribosomal protein S8	1165.86	818.43	582.04	981.17	886.875	247.88	720.1	581.4	324.16	541.887	200.906	-0.711813	0.0719446
TKVG1_10310	TKV_RS09960	rplF	50S ribosomal protein L6	1195.44	930.14	691.15	1191.28	1002	241.549	816.03	660.44	307.53	594.667	260.553	-0.74577	0.0808709
TKVG1_10305	TKV_RS09955	rplR	50S ribosomal protein L18	1559.87	1118.52	843.23	1388.96	1227.64	314.154	1012.64	818.06	395.01	741.903	315.779	-0.721813	0.0857955
TKVG1_10300	TKV_RS09950	rpsE	30S ribosomal protein S5	906.79	720.53	551.98	887.34	766.66	165.746	537.99	456.28	205.77	400.013	173.11	-0.913998	0.0284343
TKVG1_10295	TKV_RS09945	rplO	50S ribosomal protein L15	934.2	682.04	600.32	931.12	786.92	171.566	573.3	469.59	240.83	427.907	170.109	-0.874063	0.0273142
TKVG1_10290	TKV_RS09940	secY	preprotein translocase subunit SecY	1054.94	843.43	612.32	1057.19	891.97	211.674	705.6	597.15	318.48	540.41	199.7	-0.727438	0.0591425
TKVG1_10285	TKV_RS09935		adenylate kinase	1518.54	1146.35	866.59	1470.32	1250.45	304.631	1083.3	895.11	452.88	810.43	323.628	-0.635677	0.120577
TKVG1_10280	TKV_RS09930	map	type I methionyl aminopeptidase	1170.59	910.59	672.04	1133.82	971.76	230.485	833.04	654.1	350.22	612.453	244.089	-0.678397	0.0857615
TKVG1_10275	TKV_RS09925		KOW domain-containing RNA-binding protein	1102.4	804.47	628.55	1080.83	904.062	228.335	727.85	585.51	325.88	546.413	203.817	-0.734018	0.0594113
TKVG1_10270	TKV_RS09920	infA	translation initiation factor IF-1	1467.94	1162.09	948.6	1540.89	1279.88	275.145	1014.4	851.19	441.22	768.937	295.31	-0.742848	0.0576297
TKVG1_10265	TKV_RS09915	rpmJ	50S ribosomal protein L36	807.84	667.89	507.75	826.68	702.54	147.922	580.9	468.39	253.98	434.423	166.086	-0.709302	0.0672122
TKVG1_10260	TKV_RS09910	rpsM	30S ribosomal protein S13	1198.02	902.95	734.03	1246.31	1020.33	243.849	919.76	636.09	377.78	644.543	271.089	-0.686337	0.0822081
TKVG1_10255	TKV_RS09905	rpsK	30S ribosomal protein S11	1010.22	762.37	595.04	1074.51	860.535	222.347	678.92	586.01	345.14	536.69	172.269	-0.691459	0.0670892
TKVG1_10250	TKV_RS09900	rpsD	30S ribosomal protein S4	1074.6	799.01	629.36	1116.4	904.842	231.42	806.77	568.3	322.44	565.837	242.174	-0.693255	0.087725
TKVG1_10245	TKV_RS09895		DNA-directed RNA polymerase subunit alpha	1418.16	1059.56	814.81	1488.14	1195.17	315.499	1034.43	854.78	467.41	785.54	289.782	-0.618666	0.122616
TKVG1_10240	TKV_RS09890	rplQ	50S ribosomal protein L17	1688.41	1203.55	1063.63	1519.97	1368.89	286.03	1261.95	939.62	508.57	903.38	377.995	-0.62688	0.115249
TKVG1_10235	TKV_RS09885		energy-coupling factor transporter ATPase	944.59	763.3	587.42	957.68	813.247	174.742	725.52	527.37	329.75	527.547	197.885	-0.656054	0.0691097
TKVG1_10230	TKV_RS09880		energy-coupling factor transporter ATPase	1105.08	808.33	618.21	1044.77	894.097	224.117	855.22	647.37	369.69	624.093	243.6	-0.546319	0.163903
TKVG1_10225	TKV_RS09875		energy-coupling factor transporter transmembraneprotein EcfT	732.54	584.12	430.56	735.86	620.77	145.214	565.36	435.86	258.65	419.957	153.972	-0.591393	0.117093
TKVG1_10220	TKV_RS09870	truA	tRNA pseudouridine(38-40) synthase TruA	709.38	583.43	450.94	724.55	617.075	127.546	574.19	443.19	268.05	428.477	153.599	-0.562493	0.120399
TKVG1_10215	TKV_RS09865	rplM	50S ribosomal protein L13	3132.63	2505.18	1993.72	2889.74	2630.32	496.835	2477.21	1588.06	1253.89	1773.05	632.293	-0.622177	0.0441818
TKVG1_10210	TKV_RS09860	rpsI	30S ribosomal protein S9	3507.61	2989.47	2550.25	3706.31	3188.41	521.835	2812.31	1900.58	1651.16	2121.35	611.246	-0.646638	0.0155465
TKVG1_10150	TKV_RS12525		hypothetical protein	3029.33	3258.63	3130.78	2531.06	2987.45	318.396	2744.12	3434.01	3263.39	3147.17	359.328	0.0197503	0.964725
TKVG1_10145	TKV_RS09800	cooF2	carbon monoxide dehydrogenase accessory protein CooF2	5090.94	7145.58	8077.72	4793.08	6276.83	1592.25	4420.23	11316.7	7752.07	7829.66	3448.87	0.236323	0.682294
TKVG1_10140	TKV_RS09795	acsA	carbon monoxide dehydrogenase/acetyl-CoA synthase CO dehydrogenase subunit AcsA	7393.42	10663.4	13115.3	6895.29	9516.86	2923.76	6114.39	16970.7	11655.4	11580.2	5428.55	0.19869	0.752227
TKVG1_10135	TKV_RS09790	cooC2	carbon monoxide dehydrogenase accessory protein CooC2	748.07	1168.03	1508.59	600.51	1006.3	412.23	791.03	1406.22	1315.11	1170.79	332.019	0.125112	0.840485
TKVG1_10130	TKV_RS09785	lipB	lipoyl(octanoyl) transferase LipB	875.77	1327.73	1653.05	731.05	1146.9	422.426	868.62	1365.78	1523.3	1252.57	341.708	0.050419	0.936877
TKVG1_10125	TKV_RS09780	lipA	lipoyl synthase	846.18	1335.04	1635.52	754.27	1142.75	415.8	939.32	1512.36	1511.74	1321.14	330.666	0.120306	0.83954
TKVG1_10120	TKV_RS12515			1791.88	2720.73	3132.63	1613.95	2314.8	729.9	1723.94	2754.74	2641.33	2373.34	565.246	-0.0234543	0.973394
TKVG1_10115	TKV_RS09770		cyclodeaminase/cyclohydrolase family protein	626.7	995.98	1325.92	552.5	875.275	357.596	697.73	1111.82	1173.94	994.497	258.878	0.0921642	0.885812
TKVG1_10110	TKV_RS13030		hypothetical protein	1572.92	1469.73	2542.89	1493	1769.63	517.394	1103.22	1677.36	1177.85	1319.48	312.174	-0.440584	0.364692
TKVG1_10105	TKV_RS09760	modA	molybdate ABC transporter substrate-binding protein	1849.15	1796.83	3039.32	1577.83	2065.78	659.58	1008.69	2147.9	1108.56	1421.72	630.873	-0.505231	0.357225
TKVG1_10100	TKV_RS09755		ABC transporter permease	927.08	948.13	1612.94	812.99	1075.29	363.32	551.14	1160.55	710.15	807.28	316.103	-0.402265	0.461465
TKVG1_10095	TKV_RS09750		ABC transporter ATP-binding protein	1505.39	1491.55	2682.57	1235.78	1728.82	647.803	1072.76	1798.17	1134.56	1335.16	402.164	-0.385834	0.469681
TKVG1_10090	TKV_RS09745		MOSC domain-containing protein	1608.89	1496.37	2600.96	1175.25	1720.37	615.142	1064.29	1814.33	1145.29	1341.3	411.65	-0.370918	0.484294
TKVG1_10085	TKV_RS09740		molybdenum cofactor guanylyltransferase	704.17	769.69	1164.27	556.41	798.635	259.566	560.7	835.42	619.81	671.977	144.599	-0.285846	0.57688
TKVG1_10080	TKV_RS09735	fdhF	hydrogen-dependent CO2 reductase, subunit FdhF	1366.76	1632.62	2917.03	1134.16	1762.64	796.08	1034.67	1624	1235.95	1298.21	299.557	-0.444071	0.419182
TKVG1_10075	TKV_RS09730	hycB3	hydrogen-dependent CO2 reductase, subunit HycB3	1118.16	1328.22	2163.35	812.3	1355.51	578.723	701.61	1113.4	911.6	908.87	205.909	-0.553369	0.309117
TKVG1_10070	TKV_RS09725	hycB4	hydrogen-dependent CO2 reductase, subunit HycB4	1247.13	1666.87	2725.49	1001.76	1660.31	761.371	888.98	1472.25	1276.57	1212.6	296.85	-0.444218	0.428799
TKVG1_10065	TKV_RS09720	hydA2	hydrogen-dependent CO2 reductase, subunit HydA2	1538.9	1921.33	3201.92	1169.28	1957.86	884.384	957.44	1688.49	1452.96	1366.3	373.151	-0.493611	0.377909
TKVG1_10060	TKV_RS09715	fdhD	hydrogen-dependent CO2 reductase, FdhD subunit	810.51	1149.96	1877.25	642	1119.93	547.294	497.49	979.96	778.95	752.133	242.35	-0.525737	0.36733
TKVG1_10055	TKV_RS13870		formate--tetrahydrofolate ligase	1491.57	1641.83	3335.3	1008.4	1869.27	1014.02	763.39	1800.75	1059.03	1207.72	534.426	-0.551416	0.369013
TKVG1_10050	TKV_RS09710		formate/nitrite transporter family protein	595.03	739.44	1301.89	470.57	776.733	366.939	309.53	730.69	480.74	506.987	211.803	-0.547672	0.358652
TKVG1_10045	TKV_RS09705	fhs	formyl-THF synthetase Fhs	7768.3	10520.7	13092.9	7588.05	9742.49	2605.75	5757.11	11403	8344.45	8501.54	2826.25	-0.217297	0.690731
TKVG1_10040	TKV_RS09700		DUF166 family protein	3778.66	5949.18	8640.71	3571.83	5485.09	2362.61	3124.46	7224.47	5376.69	5241.87	2053.33	-0.105174	0.877028
TKVG1_10035	TKV_RS09695	fchA	methenyl-THF cyclohydrolase FchA	2657.6	4245.63	5883.88	2326.1	3778.3	1634.7	1878.79	4605.82	3446.46	3310.36	1368.6	-0.200943	0.756125
TKVG1_10030	TKV_RS09690	folD	methylene-THF dehydrogenase FolD	4609.92	7301.18	9928.57	4087.52	6481.8	2694.94	3360.11	8126.47	6277.55	5921.38	2403.06	-0.152373	0.815017
TKVG1_10025	TKV_RS09685	metV	methylene-THF reductase, MetV subunit	3771.01	5859.52	8340.13	3405.09	5343.94	2271.29	2666.06	6802.97	5370.47	4946.5	2100.79	-0.135726	0.839145
TKVG1_10020	TKV_RS09680	metF	methylene-THF reductase, MetF subunit	4919.21	7894.43	11265.7	4526.8	7151.53	3127.86	3499.92	9294.99	7242.88	6679.26	2938.36	-0.123986	0.852867
TKVG1_10015	TKV_RS09675	lpdA	dihydrolipoyl dehydrogenase	4171.68	5689.31	7745.69	3677.25	5320.98	1829.17	3350.87	6445.01	5955.57	5250.48	1663.22	-0.0684762	0.916448
TKVG1_10010	TKV_RS09670	cooC	carbon monoxide dehydrogenase accessory protein CooC	4625.46	5968	7686.67	4209.19	5622.33	1567.56	3900.71	6440.67	6448.12	5596.5	1468.6	-0.0601549	0.92267
TKVG1_10005	TKV_RS09665	acsD	acetyl-CoA decarbonylase/synthase complex subunit delta	5257.66	6914.77	9021.43	5131.8	6581.41	1818.29	4073.42	8738.53	6869.88	6560.61	2347.88	-0.0488581	0.937927
TKVG1_10000	TKV_RS09660	acsC	acetyl-CoA decarbonylase/synthase complex subunit gamma	6521.8	8705.66	11582.3	5985.99	8198.93	2543.85	4673.85	11148.2	8551.65	8124.57	3258.24	-0.0530641	0.936307
TKVG1_09995	TKV_RS09655	acsE	carbon monoxide dehydrogenase/acetyl-CoA synthase methytransferase subunit	8236.87	10453.2	14238	7454.66	10095.7	3039.58	5303.53	12684.3	9942.54	9310.14	3730.82	-0.1395	0.821057
TKVG1_09990	TKV_RS09650	acsB	acetyl-CoA decarbonylase/synthase complex subunit alpha/beta	5308.67	7060.79	9860.26	4633.94	6715.91	2332.44	3376.22	8823.14	7255.87	6485.08	2804.07	-0.0817201	0.904286
TKVG1_09985	TKV_RS09645	gcvH	glycine cleavage system protein GcvH	6326.4	8630.86	11415.6	5315.82	7922.16	2710.82	3917.62	9135.67	7737.66	6930.32	2701.09	-0.202681	0.739782
TKVG1_09980	TKV_RS09640	acsV	corrinoid activation/regeneration protein AcsV	1318.81	1598.98	2140.77	1077.39	1533.99	457.235	957.85	1626.47	1818.98	1467.77	451.969	-0.106647	0.85344
TKVG1_09975	TKV_RS09635		hypothetical protein	999.84	1176.78	1542.58	859.02	1144.55	295.485	719.04	1187.46	1382.26	1096.25	340.887	-0.104518	0.852867
TKVG1_09970	TKV_RS09630		CooT family nickel-binding protein	633.39	787.81	996.3	550.04	741.885	196.139	437.66	746.08	794.19	659.31	193.456	-0.197436	0.719714
TKVG1_09965	TKV_RS09625		amidohydrolase family protein	647.24	736.25	1054.4	498.2	734.023	235.082	545.71	760.97	987.95	764.877	221.146	-0.0100814	0.989191
TKVG1_09960	TKV_RS12155		hypothetical protein	445.16	540.5	812.46	408	551.53	182.685	379.37	531.65	703.1	538.04	161.96	-0.0945086	0.876807
TKVG1_09955	TKV_RS09615	ech2D	ferredoxin-oxidizing Ech-type membrane-associated [NiFe]-hydrogenase, Ech2D subunit	362.3	514.96	769.5	383.22	507.495	187.286	348.82	499.05	615.38	487.75	133.639	-0.115456	0.846952
TKVG1_09950	TKV_RS09610	ech2E	ferredoxin-oxidizing Ech-type membrane-associated [NiFe]-hydrogenase, Ech2E subunit	288.62	379.18	509.01	250.51	356.83	114.913	230.48	364.58	438.5	344.52	105.451	-0.0994276	0.868818
TKVG1_09945	TKV_RS09605	hycB2	ferredoxin-oxidizing Ech-type membrane-associated [NiFe]-hydrogenase accessory protein HycB2	174.2	267.92	397.45	177.47	254.26	104.875	133.06	273.39	259.57	222.007	77.3394	-0.213362	0.733941
TKVG1_09940	TKV_RS09600	ech2A1	ferredoxin-oxidizing Ech-type membrane-associated [NiFe]-hydrogenase, Ech2A1 subunit	196.15	307.94	404.97	179.43	272.123	105.349	147	264.52	272.99	228.17	70.4227	-0.26689	0.651208
TKVG1_09935	TKV_RS09595	ech2A2	ferredoxin-oxidizing Ech-type membrane-associated [NiFe]-hydrogenase, Ech2A2 subunit	110.73	185.24	288.84	90.69	168.875	89.7276	91.83	182.12	200.05	158	58.0019	-0.134585	0.844148
TKVG1_09930	TKV_RS09590	ech2C	ferredoxin-oxidizing Ech-type membrane-associated [NiFe]-hydrogenase, Ech2C subunit	220.17	277.44	479.05	145.99	280.663	142.787	162.01	305.94	331.81	266.587	91.4851	-0.119854	0.859558
TKVG1_09925	TKV_RS09585	ech2B	ferredoxin-oxidizing Ech-type membrane-associated [NiFe]-hydrogenase, Ech2B subunit	166.02	218.2	335.6	122.94	210.69	91.9318	162.27	233.68	263.07	219.673	51.8392	-0.0194676	0.981317
TKVG1_09920	TKV_RS09580	ech2F	ferredoxin-oxidizing Ech-type membrane-associated [NiFe]-hydrogenase, Ech2F subunit	179.35	223.63	295.5	133.96	208.11	68.8071	97.48	204.42	218.01	173.303	66.0156	-0.261261	0.658994
TKVG1_09915	TKV_RS09575		hypothetical protein	73.16	91.61	70.8	72.68	77.0625	9.75166	77.2	92.8	108.5	92.8333	15.65	0.208769	0.574011
TKVG1_09910	TKV_RS09570	cobS	adenosylcobinamide-GDP ribazoletransferase	44.44	45.54	44.19	32.74	41.7275	6.0203	51.83	44.73	52.21	49.59	4.21317	0.165867	0.652569
TKVG1_09905	TKV_RS13025		hypothetical protein	41.96	25.08	25.6	18.67	27.8275	9.93475	78.31	57.81	58.76	64.96	11.5712	0.997285	0.0345233
TKVG1_09900	TKV_RS09565		aminodeoxychorismate/anthranilate synthase component II	836.74	884.38	895.04	895.58	877.935	27.9434	641.53	525.75	418.48	528.587	111.552	-0.788628	0.00318388
TKVG1_09895	TKV_RS09560	pabB	aminodeoxychorismate synthase component I	720.53	667.8	596.56	631.31	654.05	53.0121	572.42	445.91	346.08	454.803	113.432	-0.5872	0.0161482
TKVG1_09890	TKV_RS09555		aminotransferase class IV	491.12	514.63	365.27	449.47	455.123	65.682	446.67	293.03	257.07	332.257	100.703	-0.518826	0.0420538
TKVG1_09885	TKV_RS09550	nikR	nickel-responsive transcriptional regulator NikR	1156.24	1149.3	955.82	1050.87	1078.06	94.6382	959.83	744.97	779.16	827.987	115.452	-0.446982	0.0064882
TKVG1_09880	TKV_RS09545	hydC	electron-bifurcating NADP+- and ferredoxin-dependent [FeFe]-hydrogenase, HydC subunit	1664.23	2100.67	2524.38	1481.16	1942.61	466.859	789.73	1523.36	1020.5	1111.2	375.13	-0.747679	0.121446
TKVG1_09875	TKV_RS09540	hydB	electron-bifurcating NADP+- and ferredoxin-dependent [FeFe]-hydrogenase, HydB subunit	1503.26	2245.98	2955.7	1402.97	2026.98	724.374	633.66	1474.09	958.35	1022.03	423.819	-0.861689	0.114401
TKVG1_09870	TKV_RS09535	hydA1	electron-bifurcating NADP+- and ferredoxin-dependent [FeFe]-hydrogenase, HydA1 subunit	1316.2	1894.26	2777.52	1120.21	1777.05	743.528	286.83	994.39	555.36	612.193	357.187	-1.22222	0.0380942
TKVG1_09865	TKV_RS09530		LysR family transcriptional regulator	127.85	218.9	314.3	103.85	191.225	95.8543	59.27	105.71	85.56	83.5133	23.2876	-1.02329	0.0696069
TKVG1_09860	TKV_RS09525		ASKHA domain-containing protein	90.58	141.06	264.9	64.93	140.368	88.8415	38.93	58.87	71.85	56.55	16.5822	-1.07898	0.0727892
TKVG1_09855	TKV_RS12150		metalloregulator ArsR/SmtB family transcription factor	97.09	111.27	76.94	65.26	87.64	20.5186	92.7	75.16	113.26	93.7067	19.0699	0.0408719	0.93138
TKVG1_09850	TKV_RS09515		(Fe-S)-binding protein	95.49	114.12	112.34	99.6	105.388	9.2385	110.53	104.45	136.55	117.177	17.051	0.0796923	0.840485
TKVG1_09845	TKV_RS09510		sulfite exporter TauE/SafE family protein	54.7	69.15	80.92	66.77	67.885	10.7486	81.26	78.8	83.85	81.3033	2.52528	0.166733	0.678806
TKVG1_09840	TKV_RS09505		ferredoxin family protein	80.61	110.96	93.54	94.18	94.8225	12.4428	104.64	71.3	86.9	87.6133	16.6814	-0.186338	0.598554
TKVG1_09835	TKV_RS12505			27.85	30.12	14.15	15.6	21.93	8.2203	28.4	18.33	28.02	24.9167	5.70738	0.0976203	0.884205
TKVG1_09830	TKV_RS09500		hypothetical protein	16.76	24.3	8.99	17.29	16.835	6.25787	21.77	37.27	11.04	23.36	13.1871	0.326768	0.618001
TKVG1_09825	TKV_RS09495		endospore germination permease	15.62	31.19	7.81	11.01	16.4075	10.3633	38.45	48.57	35.34	40.7867	6.9176	1.08993	0.0372983
TKVG1_09810	TKV_RS09480		FAD-dependent thymidylate synthase	216.39	159.97	129.68	175.91	170.488	36.1124	358.9	120.68	268.21	249.263	120.235	0.406614	0.354118
TKVG1_09805	TKV_RS09475		MazG-like family protein	46.24	27.22	52.4	57.23	45.7725	13.1607	136.59	41	80.91	86.1667	48.0113	0.653768	0.217184
TKVG1_09800	TKV_RS09470		spore coat protein	357.34	553.82	222.86	185.52	329.885	166.53	448.13	912.01	441.04	600.393	269.891	0.716998	0.189376
TKVG1_09795	TKV_RS09465		spore coat protein	306.06	467.61	165.35	136.07	268.773	151.913	298.18	677.02	304.64	426.613	216.883	0.544629	0.359207
TKVG1_09790	TKV_RS09460	trxB	thioredoxin-disulfide reductase	226.66	183.05	136.9	265.31	202.98	55.4062	293.5	139.51	160.89	197.967	83.4221	-0.120531	0.780724
TKVG1_09785	TKV_RS09455		LysM peptidoglycan-binding domain-containing protein, CBM50 family	16.91	9.19	4.86	12.63	10.8975	5.11594	18.79	8.73	11.58	13.0333	5.18508	0.16391	0.780275
TKVG1_09780	TKV_RS09450	cwlD	N-acetylmuramoyl-L-alanine amidase CwlD	6.44	5.87	6.21	5.32	5.96	0.486689	15.76	8.91	7.99	10.8867	4.24542	0.671196	0.189177
TKVG1_09775	TKV_RS09445	ppaX		289.26	229.64	172.57	243.65	233.78	48.0945	266.48	144.96	200.28	203.907	60.8411	-0.263741	0.388385
TKVG1_09770	TKV_RS12500			198.68	152.15	175.82	190.1	179.188	20.3421	227.27	109.75	166.37	167.797	58.773	-0.180204	0.65527
TKVG1_09765	TKV_RS13630		hypothetical protein	211.26	193.47	132.2	185.44	180.593	34.0179	278.71	132.1	204.43	205.08	73.3072	0.0959648	0.804969
TKVG1_09760	TKV_RS09435		hypothetical protein	314.08	236.6	181.45	245.82	244.487	54.4084	496.58	185.53	327.73	336.613	155.715	0.336803	0.415915
TKVG1_09755	TKV_RS09430			1540.29	1426.93	1027.17	1400.53	1348.73	222.781	2289.92	1499.92	2471.09	2086.98	516.413	0.542924	0.0642707
TKVG1_09750	TKV_RS09425		BON domain-containing protein	538.43	532.59	374.67	449.31	473.75	77.5882	826.47	675.52	1158.3	886.763	246.973	0.806802	0.0147726
TKVG1_09745	TKV_RS09420	cdaA	diadenylate cyclase CdaA	211.3	200.46	121.28	201.02	183.515	41.7882	377.05	193.68	523.39	364.707	165.201	0.838238	0.055439
TKVG1_09740	TKV_RS09415		CdaR family protein	237.23	232.67	147.43	189.96	201.822	42.0497	410.84	218.72	490.73	373.43	139.811	0.761486	0.0468231
TKVG1_09735	TKV_RS09410	buk1	butyrate kinase	10.94	11.64	11.4	13.26	11.81	1.00936	25.22	12.13	44.56	27.3033	16.3151	0.948746	0.0727892
TKVG1_09730	TKV_RS09405	ptb	phosphate butyryltransferase	5.52	9.39	9.2	2.01	6.53	3.50043	13.84	14.02	13.39	13.75	0.3245	0.771142	0.193992
TKVG1_09725	TKV_RS09400		Glu/Leu/Phe/Val dehydrogenase	8.05	13.04	12.43	5.63	9.7875	3.55271	6.22	16.96	13.17	12.1167	5.44693	0.208602	0.755752
TKVG1_09720	TKV_RS09395	buk2	butyrate kinase	94.11	94.51	81.37	94	90.9975	6.42207	74.61	94.33	56.6	75.18	18.8715	-0.309321	0.377909
TKVG1_09715	TKV_RS09390		hypothetical protein	91.27	112.72	83.91	95.48	95.845	12.2239	87.27	112.32	60.54	86.71	25.8945	-0.184662	0.65527
TKVG1_09710	TKV_RS09385		2-oxoglutarate/2-oxoacid ferredoxin oxidoreductase subunit delta	109.4	104.22	88.14	88.87	97.6575	10.782	88.8	88.2	59.14	78.7133	16.9537	-0.355585	0.338329
TKVG1_09705	TKV_RS09380		2-oxoglutarate/2-oxoacid ferredoxin oxidoreductase subunit alpha	93.96	106.22	88.65	97.06	96.4725	7.36802	94.23	135.54	76.53	102.1	30.282	0.0310428	0.948856
TKVG1_09700	TKV_RS09375		2-oxoglutarate/2-oxoacid ferredoxin oxidoreductase subunit beta	132.63	142.48	111.77	124.99	127.968	12.956	117.62	152.53	88.28	119.477	32.1652	-0.139964	0.724444
TKVG1_09695	TKV_RS09370		2-oxoglutarate/2-oxoacid ferredoxin oxidoreductase subunit gamma	141.46	131.97	109.34	144.57	131.835	15.9255	101.95	144.59	104.48	117.007	23.9213	-0.201236	0.588369
TKVG1_09690	TKV_RS09365		bifunctional enoyl-CoA hydratase/phosphate acetyltransferase	10.79	12.54	14.17	16.52	13.505	2.43823	12.32	12.42	10.19	11.6433	1.25962	-0.266526	0.562069
TKVG1_09685	TKV_RS09360	iorA	indolepyruvate ferredoxin oxidoreductase subunitalpha	24.69	27.46	20.81	25.12	24.52	2.7566	25.73	37.15	20.44	27.7733	8.54034	0.121867	0.783109
TKVG1_09680	TKV_RS09355		indolepyruvate oxidoreductase subunit beta	30.34	30.03	30.63	29.73	30.1825	0.388619	39.86	32.62	32.04	34.84	4.35711	0.119205	0.755752
TKVG1_09675	TKV_RS09350		lysophospholipid acyltransferase family protein	15.29	10.97	11.06	14.02	12.835	2.16488	10.59	19.57	9.77	13.31	5.4368	-0.0154952	0.983662
TKVG1_09670	TKV_RS09345	glmM	phosphoglucosamine mutase	261.7	174.74	91.15	256.41	196	80.4391	295.21	92.85	126.21	171.423	108.492	-0.252509	0.652569
TKVG1_09665	TKV_RS09340	glmS	glutamine--fructose-6-phosphate transaminase (isomerizing)	325.4	203.54	122.15	297.74	237.207	92.761	382.8	160.12	194.83	245.917	119.808	-0.0325134	0.956643
TKVG1_09660	TKV_RS13020		hypothetical protein	198	175.11	94.14	230.74	174.498	58.2331	175.52	118.4	126.37	140.097	30.9352	-0.352592	0.38982
TKVG1_09655	TKV_RS09330		hypothetical protein	121.37	98.87	47.88	106.41	93.6325	31.9027	119.42	79.67	88.8	95.9633	20.8207	-0.0156244	0.979041
TKVG1_09650	TKV_RS09325		hypothetical protein	151.32	169	92.48	212.66	156.365	49.7846	256.26	108.92	136.97	167.383	78.2368	0.00144706	0.998021
TKVG1_09645	TKV_RS09320		hypothetical protein	165.54	173.17	86.67	191.27	154.162	46.2707	218.54	126.49	85.65	143.56	68.0696	-0.165733	0.744541
TKVG1_09640	TKV_RS09315		putative zinc-binding protein	259.58	164.03	116.7	232.49	193.2	64.9439	269.12	111.82	151.96	177.633	81.7323	-0.190111	0.690731
TKVG1_09635	TKV_RS09310		metalloregulator ArsR/SmtB family transcription factor	90.65	78.58	38.67	78.44	71.585	22.6774	115.42	45.52	43.21	68.05	41.0399	-0.152326	0.781125
TKVG1_09630	TKV_RS09305		DUF169 domain-containing protein	124.66	108.55	59.89	110.76	100.965	28.2965	156.62	79.13	69.93	101.893	47.6174	-0.0685059	0.890994
TKVG1_09625	TKV_RS09300		hypothetical protein	165.74	156.68	69.12	190.91	145.613	53.0112	169.57	67.71	66.76	101.347	59.085	-0.531948	0.286001
TKVG1_09620	TKV_RS09295		ferredoxin family protein	160.5	114.56	71.01	171.17	129.31	45.9765	164.52	82.73	66.76	104.67	52.4431	-0.346499	0.472188
TKVG1_09615	TKV_RS09290		putative zinc-binding protein	103.91	78.79	46.37	109.64	84.6775	28.8395	116.69	60.62	43.17	73.4933	38.4134	-0.259604	0.602437
TKVG1_09610	TKV_RS09285		putative zinc-binding protein	99.3	79.64	59.26	114.57	88.1925	24.0096	101.36	58.45	33.66	64.49	34.2518	-0.483925	0.308157
TKVG1_09605	TKV_RS09280		putative zinc-binding protein	198.74	143.21	89.35	202.8	158.525	53.5327	153.4	99.94	57.98	103.773	47.8254	-0.613449	0.182022
TKVG1_09600	TKV_RS13975		hypothetical protein	146.22	143.38	100.18	174.67	141.113	30.7289	157.56	102.51	50.57	103.547	53.5025	-0.47742	0.308157
TKVG1_09595	TKV_RS09275		hypothetical protein	106.91	100.39	70.16	119.58	99.26	20.9723	93.89	69.05	48.83	70.59	22.5694	-0.531276	0.126556
TKVG1_09590	TKV_RS09270		IS1182-like element ISTte1 family transposase	10.06	10.16	5.04	8.96	8.555	2.40557	14.48	5.45	7.54	9.15667	4.7271	0.0085786	0.990213
TKVG1_09585	TKV_RS09265		secondary thiamine-phosphate synthase enzyme YjbQ	108.67	155.45	116.19	130.19	127.625	20.582	104.03	100.64	98.78	101.15	2.6619	-0.377665	0.233038
TKVG1_09580	TKV_RS09260	ligD	non-homologous end-joining DNA ligase	49.81	66.94	42.91	47.31	51.7425	10.5255	53.91	66.99	57.07	59.3233	6.82493	0.143916	0.707289
TKVG1_09575	TKV_RS09255		Ku protein	17.02	35.78	14.53	14.23	20.39	10.3359	39.07	56.32	50.27	48.5533	8.75219	1.05721	0.0293283
TKVG1_09570	TKV_RS09250		serine hydrolase, CBM50 family	173.63	211.94	223.52	185.33	198.605	23.0836	150.02	198.23	174.51	174.253	24.106	-0.232072	0.550636
TKVG1_09565	TKV_RS09245	ytaF	sporulation membrane protein YtaF	56.18	47.14	51.89	54.84	52.5125	4.00496	67.38	48.99	79.05	65.14	15.1547	0.223042	0.546771
TKVG1_09560	TKV_RS09240		DUF503 domain-containing protein	44.5	45.72	24.16	33.38	36.94	10.1693	87.23	30.87	56.96	58.3533	28.2058	0.505257	0.286001
TKVG1_09555	TKV_RS12875		hypothetical protein	83.78	83.96	47.85	90.46	76.5125	19.3594	147.49	58.62	106.32	104.143	44.475	0.326297	0.468159
TKVG1_09550	TKV_RS09230			90.12	67.94	42.48	67.91	67.1125	19.4716	124.83	66.4	75.38	88.87	31.4643	0.302302	0.430804
TKVG1_09545	TKV_RS09225		helix-turn-helix domain-containing protein	170.83	194.54	96.53	179.97	160.468	43.729	180.21	77.35	71.95	109.837	61.0049	-0.580333	0.18411
TKVG1_09540	TKV_RS09220		helix-turn-helix transcriptional regulator	0	0	0	0	0	0	6.21	5.41	4.73	5.45	0.74081	1.10346	0.0851645
TKVG1_09535	TKV_RS09215		DUF6514 family protein	36.61	42.67	30.95	37.35	36.895	4.7952	82.84	115.03	32.82	76.8967	41.426	0.844033	0.108448
TKVG1_09530	TKV_RS09210	acpS	holo-ACP synthase	24.8	28.27	16.3	22.7	23.0175	5.03295	17.66	25.34	16.86	19.9533	4.68211	-0.22436	0.65527
TKVG1_09525	TKV_RS09205		bifunctional ADP-dependent NAD(P)H-hydrate dehydratase/NAD(P)H-hydrate epimerase	35.63	32.66	33.25	33.91	33.8625	1.2842	30.89	56.02	35.35	40.7533	13.4081	0.20475	0.65527
TKVG1_09520	TKV_RS09200		outer membrane lipoprotein carrier protein LolA	31.01	42.35	33.49	43.35	37.55	6.21652	42.81	55.91	49.85	49.5233	6.55611	0.326793	0.388385
TKVG1_09515	TKV_RS09195	alr	alanine racemase	46.18	43.29	40.63	50.07	45.0425	4.04603	46.77	64.68	47.45	52.9667	10.1497	0.171028	0.656895
TKVG1_09510	TKV_RS09190		ribbon-helix-helix protein, CopG family	950.89	970.17	1119.36	1050.48	1022.73	77.5263	825.48	772.44	681.98	759.967	72.5586	-0.487447	0.102006
TKVG1_09505	TKV_RS09185		type II toxin-antitoxin system PemK/MazF family toxin	852.27	990.11	950.73	971.11	941.055	61.3354	749.47	761.74	648.93	720.047	61.8936	-0.438867	0.120577
TKVG1_09500	TKV_RS09180		hypothetical protein	380.02	309.23	267.58	385.68	335.627	57.1642	415.93	254.01	182.05	283.997	119.789	-0.315124	0.388731
TKVG1_09495	TKV_RS09175		DUF5693 family protein	201.78	188.16	171.64	177.91	184.872	13.1687	229.59	113.57	139.28	160.813	60.9338	-0.291968	0.34373
TKVG1_09490	TKV_RS09170	csaB	polysaccharide pyruvyl transferase CsaB	243	226.98	213.56	244.6	232.035	14.6628	243.41	152.07	154.8	183.427	51.965	-0.419055	0.0904875
TKVG1_09485	TKV_RS09165		WecB/TagA/CpsF family glycosyltransferase	226.55	193.34	181.35	237.35	209.648	26.582	194.86	121.37	101.82	139.35	49.0568	-0.650944	0.0330598
TKVG1_09480	TKV_RS09160		YitT family protein	198.49	175.36	162.79	186.98	180.905	15.3301	181.76	98.94	99.04	126.58	47.7873	-0.588106	0.0453627
TKVG1_09475	TKV_RS09155		transketolase	400.96	406.02	319.93	411.56	384.618	43.3417	308.26	246.3	147.01	233.857	81.342	-0.752863	0.0206433
TKVG1_09470	TKV_RS09150		transketolase family protein	354.22	330.46	262.87	320.84	317.098	38.7783	324.82	216	153.95	231.59	86.4952	-0.516287	0.099963
TKVG1_09465	TKV_RS09145		DUF2148 domain-containing protein	174.15	214.22	163.4	197.1	187.218	22.8388	188.59	175.21	128.6	164.133	31.4916	-0.249456	0.39564
TKVG1_09460	TKV_RS09140		6-phosphofructokinase	95.44	76.49	65.36	124.03	90.33	25.67	422.02	201.07	394.41	339.167	120.389	1.66545	1.73727e-06
TKVG1_09455	TKV_RS09135		universal stress protein	61.32	30.89	24.42	56.4	43.2575	18.3193	138.56	49.14	127.21	104.97	48.6821	1.02494	0.0420538
TKVG1_09450	TKV_RS09130			0	4.86	4.11	2.86	2.9575	2.13729	27.5	13.84	20.46	20.6	6.83108	1.86029	0.00327013
TKVG1_09445	TKV_RS09125		[Fe-Fe] hydrogenase large subunit C-terminal domain-containing protein	1799.02	1913.27	1888.5	1880.64	1870.36	49.5493	1827.04	1387.48	1396.82	1537.11	251.127	-0.36039	0.120577
TKVG1_09440	TKV_RS09120		class I SAM-dependent methyltransferase	882.18	921.67	720.36	829.02	838.308	87.3155	944.55	709.91	651.51	768.657	155.102	-0.198203	0.333033
TKVG1_09435	TKV_RS09115		FAD-dependent oxidoreductase	70.87	102.22	96.9	55.48	81.3675	22.0337	94.47	123.21	92.83	103.503	17.0862	0.253842	0.579304
TKVG1_09430	TKV_RS09105	mobB	molybdopterin-guanine dinucleotide biosynthesis protein B	351.91	216.61	306.71	294.33	292.39	56.2556	168.97	204.12	73.35	148.813	67.6751	-0.912809	0.0547254
TKVG1_09425	TKV_RS09100		substrate-binding domain-containing protein	223.35	113.73	220.94	184.75	185.692	51.1207	94.45	123.27	42.49	86.7367	40.9387	-0.991392	0.0546788
TKVG1_09420	TKV_RS09095		ABC transporter permease	182.52	109.73	191.24	138.4	155.472	38.2741	86.34	132.46	37.51	85.4367	47.4814	-0.772804	0.15401
TKVG1_09415	TKV_RS09090		ABC transporter ATP-binding protein	176.6	102.06	149.09	128.74	139.123	31.5454	82.04	128.55	58.44	89.6767	35.6734	-0.6041	0.201515
TKVG1_09410	TKV_RS09085		MogA/MoaB family molybdenum cofactor biosynthesis protein	193.31	121.43	208.63	135.14	164.627	42.7958	96.83	170.77	43.24	103.613	64.035	-0.591233	0.309825
TKVG1_09405	TKV_RS09080	glp	gephyrin-like molybdotransferase Glp	169.8	104.57	185.11	116.35	143.958	39.4754	90.12	144.44	61.87	98.81	41.9653	-0.523036	0.314295
TKVG1_09400	TKV_RS09075		molybdopterin biosynthesis protein	136.63	89.47	149.79	88.18	116.017	31.8599	69.09	104.79	41.69	71.8567	31.6408	-0.65103	0.203311
TKVG1_09395	TKV_RS09070	moaA	GTP 3',8-cyclase MoaA	126.1	93.72	170.66	94.95	121.358	36.1221	76.43	104.26	42.38	74.3567	30.9921	-0.674915	0.191861
TKVG1_09390	TKV_RS09065	moaC	cyclic pyranopterin monophosphate synthase MoaC	113.58	73.18	158.1	75.27	105.032	39.9567	68.71	117.1	33.47	73.0933	41.987	-0.477303	0.428546
TKVG1_09385	TKV_RS09060		MOSC domain-containing protein	54.16	49.3	68.26	32.02	50.935	14.9556	49.44	61.24	27.9	46.1933	16.9055	-0.187904	0.748144
TKVG1_09380	TKV_RS09055	thiC	phosphomethylpyrimidine synthase ThiC	218.85	177.26	164.45	194.75	188.827	23.5549	154.05	183.1	97.65	144.933	43.4484	-0.408357	0.270952
TKVG1_09375	TKV_RS09050		homoserine dehydrogenase	133.36	71.04	99.25	90.62	98.5675	26.0251	107.42	66.81	120.88	98.37	28.1481	-0.0735484	0.882257
TKVG1_09370	TKV_RS09045		homocysteine synthase	214.83	127.58	164.36	159.94	166.678	36.0465	128.98	100.33	115.22	114.843	14.3287	-0.581086	0.070295
TKVG1_09365	TKV_RS09040		homoserine O-acetyltransferase	260.99	156.02	241.94	189.25	212.05	48.1239	173.23	114.41	128.25	138.63	30.7532	-0.663194	0.0692506
TKVG1_09360	TKV_RS09035			157.85	154.45	141.13	194.85	162.07	23.0137	183.45	137.64	143.25	154.78	24.9869	-0.139913	0.621313
TKVG1_09355	TKV_RS09030		RsmF rRNA methyltransferase first C-terminal domain-containing protein	109.73	101.73	77.47	95.59	96.13	13.7211	131.75	98.36	74.56	101.557	28.7287	0.00151001	0.997984
TKVG1_09350	TKV_RS09025	corA	magnesium/cobalt transporter CorA	84.96	81.49	53.95	76.68	74.27	13.9656	94.45	64.12	57.68	72.0833	19.6359	-0.112635	0.721693
TKVG1_09345	TKV_RS09020		glucoamylase family protein, GT84 / GH94 family	30.8	30.75	19.54	28.82	27.4775	5.37136	41.83	38.49	23.43	34.5833	9.80237	0.256347	0.456065
TKVG1_09340	TKV_RS09015		ATP-binding cassette domain-containing protein	225.76	170.16	156.21	192.16	186.072	30.3157	589.48	206.84	614.38	470.233	228.445	1.10806	0.0123008
TKVG1_09335	TKV_RS09010		ABC transporter permease	173.41	165.64	144.69	143.01	156.688	15.1746	449.25	189.53	514.13	384.303	171.77	1.08988	0.00792296
TKVG1_09330	TKV_RS09005		GldG family protein	161.58	169.08	154.84	151.52	159.255	7.773	341.15	169.06	416.03	308.747	126.633	0.795337	0.0468231
TKVG1_09325	TKV_RS09000		DUF4340 domain-containing protein	146.77	166.66	158.79	135.75	151.993	13.57	262.06	180.92	255.97	232.983	45.1909	0.508782	0.0857955
TKVG1_09320	TKV_RS13015		hypothetical protein	417.11	558.23	531.75	471.11	494.55	63.207	700.3	500.93	591.9	597.71	99.8119	0.174848	0.605229
TKVG1_09315	TKV_RS13625		hypothetical protein	205.07	275.26	191.91	195.75	216.998	39.2327	350.6	239.24	249.16	279.667	61.63	0.272607	0.378847
TKVG1_09310	TKV_RS13620		hypothetical protein	229.68	308.39	216.36	231.53	246.49	41.8163	297.04	235.67	232.58	255.097	36.3568	-0.0206992	0.960689
TKVG1_09305	TKV_RS13615		HEPN domain-containing protein	208.93	224.92	173.02	170.63	194.375	26.862	204.63	187.2	202.54	198.123	9.51743	-0.0353615	0.92949
TKVG1_09300	TKV_RS08990		nucleotidyltransferase domain-containing protein	267.15	276.13	232.37	217.28	248.232	27.9632	316.84	260.92	268.12	281.96	30.4207	0.110424	0.677402
TKVG1_09295	TKV_RS08985		Uma2 family endonuclease	292.82	255.43	228.62	216.73	248.4	33.7481	345.55	257.08	264.54	289.057	49.0666	0.138712	0.58395
TKVG1_09290	TKV_RS08980	hisZ	ATP phosphoribosyltransferase regulatory subunit	213.94	232.93	204.17	206.61	214.412	13.0244	192.38	231.28	448.54	290.733	138.042	0.357894	0.447459
TKVG1_09285	TKV_RS08975	hisG	ATP phosphoribosyltransferase	341.84	341.47	372.89	282.68	334.72	37.6889	314.93	370.26	786.62	490.603	257.846	0.437982	0.383946
TKVG1_09280	TKV_RS08970	hisD	histidinol dehydrogenase	285.38	273.88	320.14	247.22	281.655	30.228	252.67	301.9	588.43	381	181.318	0.338412	0.494186
TKVG1_09275	TKV_RS08965	hisC	histidinol-phosphate transaminase	270.32	267.48	342.06	239.42	279.82	43.7741	248.98	301.8	564.28	371.687	168.869	0.307455	0.546771
TKVG1_09270	TKV_RS08960	hisB	imidazoleglycerol-phosphate dehydratase HisB	379.41	357.49	428.8	313.29	369.748	48.0217	321.34	383.93	604.2	436.49	148.574	0.165938	0.734904
TKVG1_09265	TKV_RS08955	hisH	imidazole glycerol phosphate synthase subunit HisH	310.56	268.92	281.89	265.59	281.74	20.4596	226.95	306.97	491.62	341.847	135.738	0.216384	0.652905
TKVG1_09260	TKV_RS08950	hisA	1-(5-phosphoribosyl)-5-[(5-phosphoribosylamino)methylideneamino]imidazole-4-carboxamide isomerase	174.89	153.1	188.81	136.53	163.332	23.1355	167.21	155.31	280.44	200.987	69.0654	0.210843	0.652569
TKVG1_09255	TKV_RS08945	hisF	imidazole glycerol phosphate synthase subunit HisF	250.38	253.75	284.38	246.83	258.835	17.2628	265.46	229.59	518.25	337.767	157.329	0.286498	0.550636
TKVG1_09250	TKV_RS08940	hisIE	bifunctional phosphoribosyl-AMP cyclohydrolase/phosphoribosyl-ATP diphosphatase HisIE	387.72	381.59	422.81	373.08	391.3	21.8476	441.6	365.69	705.79	504.36	178.525	0.273997	0.516768
TKVG1_09245	TKV_RS08935		PIG-L family deacetylase	392.1	347.21	288.93	343.05	342.822	42.2373	1123.24	454.69	1651.57	1076.5	599.807	1.37298	0.00327013
TKVG1_09240	TKV_RS08930		dipeptidase	310.58	310.77	247.59	321.63	297.642	33.7657	338.12	216.12	225.04	259.76	68.0082	-0.27355	0.234066
TKVG1_09235	TKV_RS08925	glyA	serine hydroxymethyltransferase	591.19	526.71	393.76	574.58	521.56	89.4778	411.01	442.94	178.44	344.13	144.377	-0.594604	0.163428
TKVG1_09230	TKV_RS08920		Na/Pi symporter	62.62	54.45	51.02	44.01	53.025	7.73272	49.35	39.71	37.79	42.2833	6.19475	-0.383559	0.193992
TKVG1_09225	TKV_RS08915		sugar phosphate nucleotidyltransferase	50.28	39.28	36.03	35.93	40.38	6.78098	48	39.34	28.89	38.7433	9.56896	-0.12932	0.702596
TKVG1_09220	TKV_RS08910	kdpA	potassium-transporting ATPase subunit KdpA	222.61	187.97	114.42	210.01	183.752	48.3878	400.94	177.68	266.9	281.84	112.377	0.494427	0.187016
TKVG1_09215	TKV_RS08905	kdpB	potassium-transporting ATPase subunit KdpB	183.12	156.85	113.68	173.57	156.805	30.7317	314.31	155.98	183.39	217.893	84.6165	0.362712	0.265981
TKVG1_09210	TKV_RS08900	kdpC	potassium-transporting ATPase subunit KdpC	375.8	328.14	272.24	301.75	319.483	43.9428	460.57	303.32	252.23	338.707	108.584	-0.00246236	0.995782
TKVG1_09205	TKV_RS08895	kdpDN	KdpD-like non-kinase potassium sensor	309.1	237.25	181.2	281.67	252.305	55.8884	363.64	198.52	219.2	260.453	89.9585	-0.0377809	0.925852
TKVG1_09200	TKV_RS08890		hypothetical protein	99.76	100.38	81.21	61.08	85.6075	18.6141	103.66	71.27	84.78	86.57	16.269	-0.0631831	0.884205
TKVG1_09195	TKV_RS08885	cas4	CRISPR-associated protein Cas4	121.24	129.08	73.85	98.01	105.545	24.9104	164.46	83.12	130.55	126.043	40.8568	0.170408	0.652184
TKVG1_09190	TKV_RS08880	pdaA	delta-lactam-biosynthetic de-N-acetylase, CE4 family	199.9	188.29	114.59	163.32	166.525	37.8379	232.3	201.36	155.57	196.41	38.6038	0.17395	0.570756
TKVG1_09185	TKV_RS08875		lysylphosphatidylglycerol synthase transmembranedomain-containing protein	99.68	98.29	54.9	82.37	83.81	20.8118	130.85	75.76	87.54	98.05	29.0099	0.146376	0.668844
TKVG1_09180	TKV_RS13850		hypothetical protein	123.57	124.1	52.72	105.84	101.558	33.646	153.13	64.81	135.38	117.773	46.7183	0.126128	0.815017
TKVG1_09175	TKV_RS08870		MBL fold metallo-hydrolase	9.63	30.28	36.81	8.75	21.3675	14.3164	15.69	57.13	37.26	36.6933	20.7258	0.50493	0.460937
TKVG1_09170	TKV_RS08865		Hsp70 family protein	12.34	21.53	32.61	6.7	18.295	11.3327	7.34	42.43	44.96	31.5767	21.0277	0.493693	0.48309
TKVG1_09165	TKV_RS08860		HEAT repeat domain-containing protein	27.69	35.41	33.02	24.28	30.1	5.04655	39.62	49.11	58.57	49.1	9.475	0.596602	0.136998
TKVG1_09160	TKV_RS13610		hypothetical protein	56.14	43.05	34.66	49.8	45.9125	9.21099	77.16	57.79	89.2	74.7167	15.8469	0.603932	0.0822081
TKVG1_09155	TKV_RS13605		hypothetical protein	165.38	168.07	141.34	179.94	163.683	16.1826	245.45	160.65	239.9	215.333	47.4384	0.309278	0.284899
TKVG1_09150	TKV_RS08850		hypothetical protein	264.33	243.3	186.81	222.68	229.28	33.0269	337.66	225.33	298.83	287.273	57.0498	0.248316	0.284899
TKVG1_09145	TKV_RS12485			108.96	122.85	56.14	88.59	94.135	28.9753	124.78	95.63	132.56	117.657	19.4682	0.260725	0.480189
TKVG1_09140	TKV_RS08845		AAA family ATPase	31.16	21.77	19.95	25.18	24.515	4.93195	77.32	36.11	98.99	70.8067	31.942	1.29672	0.00293588
TKVG1_09135	TKV_RS08840		acyl-CoA dehydratase activase	222.9	202.88	199.33	167.02	198.032	23.1326	350.24	204.9	418	324.38	108.878	0.586649	0.120577
TKVG1_09130	TKV_RS08835		cell division FtsA domain-containing protein	105.72	105.38	89.26	98.61	99.7425	7.71745	109.58	96.72	94.31	100.203	8.20935	-0.0593371	0.796
TKVG1_09125	TKV_RS08830		peptide ABC transporter substrate-binding protein	365.89	416.45	333.43	395.15	377.73	36.0803	385.55	269.45	231.97	295.657	80.0737	-0.427278	0.0853047
TKVG1_09120	TKV_RS08825		hypothetical protein	70.67	60.39	40.22	63.41	58.6725	13.0362	94.26	42.68	74.83	70.59	26.0501	0.180662	0.663488
TKVG1_09115	TKV_RS08820		HAD family phosphatase	125.54	124.32	97.91	140.08	121.963	17.5606	166.43	88.92	133.79	129.713	38.9155	0.00524686	0.99053
TKVG1_09105	TKV_RS08810		50S ribosomal protein L25/general stress proteinCtc	2234.11	2187.13	1436.95	2730.55	2147.18	533.51	2369.31	2282.53	1199.84	1950.56	651.589	-0.182053	0.673366
TKVG1_09100	TKV_RS08805	lysA	diaminopimelate decarboxylase	1688.04	1123.28	718.7	1175.08	1176.27	397.529	1698.37	768.48	1264.78	1243.88	465.297	0.00617299	0.991106
TKVG1_09095	TKV_RS08800		hypothetical protein	5.83	8.85	8.63	8.68	7.9975	1.44806	16.68	20.87	15.62	17.7233	2.77615	0.913492	0.0787758
TKVG1_09090	TKV_RS08795	ugpC	sn-glycerol-3-phosphate ABC transporter ATP-binding protein UgpC	263.58	265.64	372.87	253.18	288.817	56.2997	207.14	390.64	342.18	313.32	95.0933	0.0566472	0.925852
TKVG1_09085	TKV_RS08790		helix-turn-helix domain-containing protein	169.43	164.29	121.42	167.2	155.585	22.8737	175.64	150.21	180.56	168.803	16.2891	0.0602231	0.826119
TKVG1_09080	TKV_RS08785	ftsE	cell division ATP-binding protein FtsE	196.31	215.27	161.6	220.2	198.345	26.5734	194.4	198.74	193.6	195.58	2.76572	-0.0718789	0.808199
TKVG1_09075	TKV_RS08780	ftsX	permease-like cell division protein FtsX	170.56	158.37	128.03	159.57	154.132	18.2458	114.86	164.57	104.98	128.137	31.9366	-0.285548	0.431414
TKVG1_09070	TKV_RS08775		M23 family metallopeptidase	315.94	314.65	255.25	321.53	301.842	31.2049	315.11	349.74	269.96	311.603	40.0054	-0.00751103	0.983662
TKVG1_09065	TKV_RS08770		S41 family peptidase	274.73	248.38	161.97	280.49	241.393	54.7624	475.48	182.73	325.39	327.867	146.391	0.320903	0.427589
TKVG1_09060	TKV_RS08765		PDZ domain-containing protein	169.39	133.3	95.8	149.5	136.998	31.1795	297.81	93.64	182.95	191.467	102.351	0.340315	0.445874
TKVG1_09055	TKV_RS08760		2-phosphosulfolactate phosphatase family protein	148.25	148.04	104.55	147.53	137.093	21.6971	290.95	114.83	149.51	185.097	93.2972	0.301515	0.434422
TKVG1_09050	TKV_RS08755	uvrB	excinuclease ABC subunit UvrB	490.6	456.28	355.13	459.75	440.44	58.9282	603.55	378.04	348.65	443.413	139.459	-0.0750213	0.796927
TKVG1_09045	TKV_RS08750	uvrA	excinuclease ABC subunit UvrA	356.94	333.36	245.95	330.02	316.567	48.5789	431.12	308.24	250.18	329.847	92.3848	-0.018053	0.957553
TKVG1_09040	TKV_RS08745		FHA domain-containing protein	223.32	179.18	156.24	197.7	189.11	28.4204	272.01	209.57	159.14	213.573	56.5414	0.0917452	0.782133
TKVG1_09035	TKV_RS08740		FtsW/RodA/SpoVE family cell cycle protein	193.84	182.42	143.55	201.62	180.357	25.7741	280.2	203.62	174.18	219.333	54.7288	0.196694	0.446785
TKVG1_09030	TKV_RS08735		penicillin-binding transpeptidase domain-containing protein	185.72	191.37	116.96	169.48	165.882	33.9092	298.06	186.41	186.79	223.753	64.3517	0.342321	0.211403
TKVG1_09025	TKV_RS08730	uvrC	excinuclease ABC subunit UvrC	210.5	190.46	150.19	189.33	185.12	25.2355	314.31	195.24	237	248.85	60.413	0.33882	0.126235
TKVG1_09020	TKV_RS08725		biotin--[acetyl-CoA-carboxylase] ligase	240.81	245.33	157.38	222.04	216.39	40.6118	331.44	265.37	249.96	282.257	43.2853	0.31319	0.165095
TKVG1_09015	TKV_RS08720	hprK	HPr(Ser) kinase/phosphatase	149.61	144.09	161.48	135.33	147.628	10.9478	155.08	123.88	130.52	136.493	16.4353	-0.191614	0.515457
TKVG1_09010	TKV_RS08715		phosphatase	158.47	176.95	167.32	158.57	165.327	8.78904	160.81	145.23	124.65	143.563	18.1375	-0.271849	0.326978
TKVG1_09005	TKV_RS08710		ROK family protein	172.01	145.76	151.49	129.27	149.632	17.643	121.78	123.79	95.63	113.733	15.7101	-0.443207	0.142436
TKVG1_09000	TKV_RS08705		long-chain fatty acid--CoA ligase	143.66	163.28	152.06	137.17	149.042	11.2804	129.87	129.36	103.92	121.05	14.8372	-0.357325	0.212729
TKVG1_08995	TKV_RS08700		YesL family protein	152.48	172.5	145.88	159.39	157.562	11.3839	151.84	122.85	111.41	128.7	20.8402	-0.353838	0.231375
TKVG1_08990	TKV_RS08695		nucleotidyltransferase domain-containing protein	240.04	213.58	286.71	139.1	219.857	61.7462	164.88	188.44	125.68	159.667	31.7031	-0.479997	0.311205
TKVG1_08985	TKV_RS08690	amrA	AmmeMemoRadiSam system protein A	161.69	163.32	156.2	145.1	156.577	8.23558	102.82	147.23	97.34	115.797	27.3596	-0.452502	0.211347
TKVG1_08980	TKV_RS08685	amrS	AmmeMemoRadiSam system radical SAM enzyme	152.33	169.45	149.56	139.43	152.692	12.472	132.28	135.76	101.45	123.163	18.8846	-0.3623	0.214591
TKVG1_08975	TKV_RS08680		hypothetical protein	33.86	50.36	24.84	18.45	31.8775	13.8487	36.73	26.48	32.77	31.9933	5.16895	-0.056387	0.931108
TKVG1_08970	TKV_RS08675		hypothetical protein	79.48	127.81	58.24	52.29	79.455	34.2842	126.07	154.38	114.5	131.65	20.5172	0.61506	0.174799
TKVG1_08965	TKV_RS08670		LacI family DNA-binding transcriptional regulator	24.64	28.99	37.81	18.15	27.3975	8.24775	29.37	32.43	34.81	32.2033	2.72707	0.134481	0.800234
TKVG1_08960	TKV_RS13600			22.35	32.58	29.19	21.66	26.445	5.31785	27.51	40.98	18.74	29.0767	11.2025	0.064884	0.914206
TKVG1_08955	TKV_RS12860			9.63	23.09	17.55	7.95	14.555	7.06394	25.21	26.18	18.6	23.33	4.12491	0.427485	0.534629
TKVG1_08950	TKV_RS08660			8.77	16.75	23.61	9.49	14.655	6.97356	21.86	27.46	23.11	24.1433	2.93953	0.515155	0.362625
TKVG1_08945	TKV_RS08655		AEC family transporter	157.03	198.64	143.21	158.38	164.315	23.8881	174.64	158.45	163.97	165.687	8.23038	-0.049324	0.865228
TKVG1_08940	TKV_RS08650	gyaR	glyoxylate reductase	407.11	478.03	433.06	430.74	437.235	29.6162	336	433.49	227.1	332.197	103.248	-0.422532	0.279953
TKVG1_08935	TKV_RS12475			414.71	494.97	366.19	373.02	412.223	59.1866	368.29	396.6	255.72	340.203	74.5214	-0.320791	0.341545
TKVG1_08930	TKV_RS08645	galE	UDP-glucose 4-epimerase GalE	433.39	434.7	382.19	370.25	405.132	33.7435	389.39	345.64	289.41	341.48	50.1196	-0.310739	0.188234
TKVG1_08925	TKV_RS08640		ATP-binding protein	276.7	344.58	289.77	276.33	296.845	32.4313	297.7	272.76	201.91	257.457	49.6948	-0.269625	0.366645
TKVG1_08920	TKV_RS08635	fsa	fructose-6-phosphate aldolase	318.35	326.89	269.73	361.37	319.085	37.795	260.6	232.67	163.13	218.8	50.1935	-0.590791	0.0363534
TKVG1_08915	TKV_RS08630			15.74	14.78	6.32	11.4	12.06	4.25535	15.27	21.98	19.87	19.04	3.43114	0.521191	0.326915
TKVG1_08910	TKV_RS08625		transposase	165.01	182.99	210.88	183.36	185.56	18.9284	207.09	180.44	175.33	187.62	17.054	-0.0670046	0.852867
TKVG1_08905	TKV_RS13160			440.39	574.11	589.54	316.54	480.145	127.989	335.17	954.5	617.31	635.66	310.072	0.312286	0.591642
TKVG1_08900	TKV_RS08615		penicillin-binding transpeptidase domain-containing protein	113.74	116.99	104.38	97.62	108.183	8.84088	182.6	131.4	179.09	164.363	28.601	0.510346	0.0453627
TKVG1_08895	TKV_RS08610		hypothetical protein	7275.98	8850.89	7688.88	12332.5	9037.07	2295.91	8799.73	9566.2	6049.91	8138.61	1849.02	-0.199796	0.635162
TKVG1_08890	TKV_RS08605			13.98	12.66	5.26	5.77	9.4175	4.5431	55.66	22.55	51.71	43.3067	18.084	1.7888	0.000180558
TKVG1_08885	TKV_RS08600		hypothetical protein	7.44	0	0	4.51	2.9875	3.65117	45.09	7.56	53.67	35.44	24.5229	1.73692	0.0125751
TKVG1_08880	TKV_RS08595		HEAT repeat domain-containing protein	6.84	4.31	0	3.53	3.67	2.8253	45.42	6.3	56.05	35.9233	26.1993	1.9288	0.00390803
TKVG1_08875	TKV_RS08590		MFS transporter	5.88	6.19	3.27	3.54	4.72	1.52768	39.98	8.75	39.58	29.4367	17.9163	2.02004	0.000128099
TKVG1_08870	TKV_RS13595		hypothetical protein	4.16	7.29	6.17	2.86	5.12	1.98667	42.63	3.19	24.41	23.41	19.739	1.23584	0.0768691
TKVG1_08865	TKV_RS08580		bis-aminopropyl spermidine synthase family protein	352.81	321.26	190.24	342.71	301.755	75.4983	365.85	251.84	134.92	250.87	115.468	-0.313271	0.472188
TKVG1_08860	TKV_RS13845		hypothetical protein	230.6	234.28	140.99	219.65	206.38	44.0339	235.17	179.17	159.8	191.38	39.1404	-0.166944	0.635409
TKVG1_08855	TKV_RS08575		hypothetical protein	154.59	186.39	143.09	221.61	176.42	35.2561	251.22	206.2	157.56	204.993	46.8417	0.131555	0.717508
TKVG1_08850	TKV_RS08570		class I SAM-dependent methyltransferase	261.92	285.05	213.47	320.96	270.35	45.0328	304.8	361.03	271.34	312.39	45.3242	0.151549	0.65766
TKVG1_08845	TKV_RS08565		cation:proton antiporter	3.33	3.23	2.28	7.13	3.9925	2.14452	6.98	6.05	5.54	6.19	0.730137	0.487938	0.389105
TKVG1_08840	TKV_RS08560		universal stress protein	4.13	3.62	5.36	4.97	4.52	0.789557	16.73	2.78	5.89	8.46667	7.32325	0.573433	0.396112
TKVG1_08835	TKV_RS08555		dynamin family protein	4.86	4.17	2	2.97	3.5	1.26878	6.25	3.11	3.08	4.14667	1.8216	0.140274	0.81622
TKVG1_08830	TKV_RS08550		DUF5320 domain-containing protein	65.83	79.58	100.58	63.65	77.41	16.9803	57.92	49.28	36.41	47.87	10.8241	-0.714649	0.0965651
TKVG1_08825	TKV_RS08545		NifB/NifX family molybdenum-iron cluster-bindingprotein	35.92	29.04	25.88	16.28	26.78	8.15899	21.91	21.36	16.67	19.98	2.8797	-0.427002	0.386489
TKVG1_08820	TKV_RS08540		ATP-binding protein	31.22	23.8	32.6	23.53	27.7875	4.79474	17.86	15.81	10.18	14.6167	3.97664	-0.915786	0.0284181
TKVG1_08815	TKV_RS08535		ATP-binding protein	63.56	52.96	32.63	49.73	49.72	12.8337	55.07	29.2	22.99	35.7533	17.0144	-0.512795	0.210569
TKVG1_08810	TKV_RS08530		NifB/NifX family molybdenum-iron cluster-bindingprotein	35.46	34.17	24.86	25.69	30.045	5.54341	37.25	28.2	11.04	25.4967	13.3125	-0.286154	0.601179
TKVG1_08805	TKV_RS08525		MBL fold metallo-hydrolase	81.45	82.44	70.15	63.65	74.4225	9.09152	66.46	46.08	29.69	47.41	18.421	-0.691653	0.0551445
TKVG1_08800	TKV_RS08520	hydE	[FeFe] hydrogenase H-cluster radical SAM maturase HydE	77.28	70.98	64.18	69.07	70.3775	5.4199	63.34	46.59	49.39	53.1067	8.97223	-0.469101	0.0437108
TKVG1_08795	TKV_RS08510	yedF	sulfurtransferase-like selenium metabolism protein YedF	12.78	18.8	7.95	17.39	14.23	4.91296	23.81	8.24	15.42	15.8233	7.79283	0.0594888	0.92949
TKVG1_08790	TKV_RS13590			109.04	85.14	64.04	54.63	78.2125	24.189	128.17	121.99	67.36	105.84	33.4676	0.329777	0.479566
TKVG1_08785	TKV_RS08500		SelB C-terminal domain-containing protein	186.1	163.3	140.26	196.96	171.655	25.1956	189.3	201.28	102.54	164.373	53.8832	-0.119243	0.791418
TKVG1_08775	TKV_RS08490		iron ABC transporter substrate-binding protein	171.95	196.91	97.3	111.69	144.463	47.6258	139.85	276.49	137.15	184.497	79.68	0.305655	0.546771
TKVG1_08770	TKV_RS08485		iron ABC transporter permease	72.89	76.48	43.76	58.96	63.0225	14.8999	102.22	127.42	96.69	108.777	16.3806	0.709423	0.0347127
TKVG1_08765	TKV_RS08480		ABC transporter ATP-binding protein	60.35	74.82	41.48	38.9	53.8875	16.9165	89.16	103.36	107.77	100.097	9.72471	0.790407	0.0376199
TKVG1_08760	TKV_RS08475	tsaA	tRNA (N6-threonylcarbamoyladenosine(37)-N6)-methyltransferase TrmO	49.24	77.81	34.43	45.81	51.8225	18.4451	95.91	102.31	93.84	97.3533	4.41561	0.795104	0.0388967
TKVG1_08755	TKV_RS08470		FmdE family protein	70.54	93.36	76.79	62.45	75.785	13.105	132.49	112.48	123.79	122.92	10.0333	0.592581	0.0591425
TKVG1_08750	TKV_RS08465	csx20	CRISPR-associated protein Csx20	43.47	44.18	26.57	38.12	38.085	8.13928	67.52	65.09	99.84	77.4833	19.3995	0.901227	0.0212378
TKVG1_08745	TKV_RS08460	csx1	CRISPR-associated CARF protein Csx1	42.39	55.17	33.87	23.32	38.6875	13.4753	51.03	54.17	73.49	59.5633	12.1626	0.523839	0.238331
TKVG1_08740	TKV_RS08455		hypothetical protein	43.25	49.64	35.31	28.22	39.105	9.32832	63.44	66.08	47.05	58.8567	10.3097	0.48026	0.242667
TKVG1_08735	TKV_RS08450	cas10	type III-A CRISPR-associated protein Cas10/Csm1	34.26	38.32	25.34	24.49	30.6025	6.78217	35.71	39.97	48.7	41.46	6.62194	0.374027	0.307143
TKVG1_08730	TKV_RS08445	csm2	type III-A CRISPR-associated protein Csm2	30.07	44.18	26.57	27.28	32.025	8.24294	36.27	50.49	34.62	40.46	8.72533	0.266006	0.563635
TKVG1_08725	TKV_RS08440	csm3	type III-A CRISPR-associated RAMP protein Csm3	41.25	40.48	37.32	42.92	40.4925	2.34744	33.65	55.07	51.76	46.8267	11.5307	0.156627	0.732222
TKVG1_08720	TKV_RS08435	csm4	type III-A CRISPR-associated RAMP protein Csm4	43.37	49.48	35.2	29.77	39.455	8.71267	50.77	57.62	57.61	55.3333	3.95197	0.411375	0.24967
TKVG1_08715	TKV_RS08430	csm5	type III-A CRISPR-associated RAMP protein Csm5	51.85	62.99	46.74	38.85	50.1075	10.1171	49.82	53.1	54.24	52.3867	2.29472	0.013307	0.979121
TKVG1_08710	TKV_RS08425		hypothetical protein	31.16	29.96	22.54	23.67	26.8325	4.35643	35.44	37.27	31.09	34.6	3.17448	0.281699	0.436907
TKVG1_08705	TKV_RS08420		Fur family transcriptional regulator	29.31	18.62	19	13.23	20.04	6.71831	21.19	20.4	21.5	21.03	0.567186	0.00807864	0.99053
TKVG1_08700	TKV_RS08415		ribonucleoside triphosphate reductase	330.37	316.65	312.31	424.66	345.998	53.0036	395.71	346.2	319.59	353.833	38.6298	-0.0402835	0.904286
TKVG1_08695	TKV_RS08410		anaerobic ribonucleoside-triphosphate reductase activating protein	90.31	100.28	93.29	102.77	96.6625	5.83426	131.14	73	97.01	100.383	29.2164	-0.0356007	0.926184
TKVG1_08690	TKV_RS08405		PAS domain S-box protein	62.01	51.96	45.97	55.37	53.8275	6.69727	81.32	50.3	55.15	62.2567	16.6865	0.122142	0.661137
TKVG1_08685	TKV_RS13585		GGDEF domain-containing protein	75.48	69.8	76.92	87.23	77.3575	7.26403	106.5	72.51	65.21	81.4067	22.0359	-0.0164838	0.971159
TKVG1_08680	TKV_RS13580		HD domain-containing phosphohydrolase	72.05	70.88	67.22	83.06	73.3025	6.82258	105.8	66.56	74.4	82.2533	20.7654	0.0711118	0.844148
TKVG1_08675	TKV_RS08400		DUF134 domain-containing protein	279.25	276.97	171.52	283.33	252.767	54.2289	212.25	207.4	131.46	183.703	45.309	-0.485858	0.150662
TKVG1_08670	TKV_RS08395		DedA family protein	253.04	234.94	164.38	239.04	222.85	39.7428	321.23	223.91	222.48	255.873	56.605	0.124342	0.635409
TKVG1_08665	TKV_RS08390	copZ	copper chaperone CopZ	215.55	250.4	197.8	281.09	236.21	37.0483	189.3	281.05	156.24	208.863	64.664	-0.203799	0.646972
TKVG1_08660	TKV_RS13840		DUF1540 domain-containing protein	92.33	70.04	52.89	69.71	71.2425	16.1791	30.2	74.55	47.87	50.8733	22.327	-0.43605	0.419182
TKVG1_08655	TKV_RS08385		heavy metal translocating P-type ATPase	107.21	91.95	83.05	105.55	96.94	11.51	108.87	90.15	74.92	91.3133	17.0049	-0.154897	0.542763
TKVG1_08650	TKV_RS08380		ATP-binding protein	21.43	27.16	21.45	17.86	21.975	3.84665	31.1	21.25	31.27	27.8733	5.7366	0.255061	0.497431
TKVG1_08645	TKV_RS13570		hypothetical protein	20.94	29.52	31.73	12.76	23.7375	8.67273	28.78	23.02	23.46	25.0867	3.20608	0.00140512	0.998021
TKVG1_08640	TKV_RS08375		response regulator transcription factor	28.12	22.99	15.76	20.82	21.9225	5.12317	35.5	21.87	27.8	28.39	6.83413	0.281815	0.464936
TKVG1_08635	TKV_RS08370		undecaprenyl-diphosphatase	0	0	0	0	0	0	1.58	1.83	1.07	1.49333	0.387341	0.925608	0.131176
TKVG1_08630	TKV_RS08365		PaaI family thioesterase	63.46	72.17	87.08	57.23	69.985	12.9393	75.28	32.35	49.18	52.27	21.6312	-0.478134	0.284899
TKVG1_08625	TKV_RS08360		isochorismatase family cysteine hydrolase	129.46	151.87	140.39	135.34	139.265	9.51657	98.57	104.19	79.02	93.9267	13.2118	-0.608386	0.0435102
TKVG1_08620	TKV_RS08355		hypothetical protein	20.63	19.14	16.63	20.03	19.1075	1.76145	14.44	21.9	8.54	14.96	6.69516	-0.348173	0.527289
TKVG1_08615	TKV_RS08350	ubiB	2-polyprenylphenol 6-hydroxylase	50.02	38.98	38.6	39.59	41.7975	5.49681	39.35	44.41	24.46	36.0733	10.3708	-0.257171	0.503075
TKVG1_08610	TKV_RS08345		TetR/AcrR family transcriptional regulator	25.3	26.05	18.74	16.08	21.5425	4.90338	28.37	16.48	17.73	20.86	6.53381	-0.120733	0.798518
TKVG1_08605	TKV_RS08340		patatin family protein	29.19	21.39	21.5	17.38	22.365	4.93726	17.86	19.02	12.42	16.4333	3.52371	-0.46687	0.266344
TKVG1_08600	TKV_RS08335		hypothetical protein	0.52	4.97	4.67	4.33	3.6225	2.08479	9.11	3.02	5.81	5.98	3.04856	0.404908	0.578549
TKVG1_08595	TKV_RS08330		YtrH family sporulation protein	8.91	11.24	7.42	8.73	9.075	1.58876	17.22	3.59	17.02	12.61	7.81219	0.299348	0.65527
TKVG1_08590	TKV_RS08325	murB	UDP-N-acetylmuramate dehydrogenase	31.03	26.36	15.72	26.86	24.9925	6.52657	24.22	19.07	26.35	23.2133	3.74294	-0.139893	0.736348
TKVG1_08585	TKV_RS08320		PHP domain-containing protein	43.18	50.4	30.95	48.02	43.1375	8.66256	50.49	35.06	32.22	39.2567	9.83144	-0.196496	0.562069
TKVG1_08580	TKV_RS08315	rapZ	RNase adapter RapZ	46.33	30.98	26.88	37.6	35.4475	8.49358	36.81	33.74	30.32	33.6233	3.24657	-0.128081	0.733912
TKVG1_08575	TKV_RS08310		YvcK family protein	38.84	37.37	32.2	45.91	38.58	5.65582	34.95	32	28.69	31.88	3.13172	-0.325164	0.292254
TKVG1_08570	TKV_RS08305		alpha-amylase family glycosyl hydrolase	9.3	26.24	25.08	13.97	18.6475	8.33222	13.88	102.91	35.76	50.85	46.3936	0.9864	0.138462
TKVG1_08565	TKV_RS08300		maltose ABC transporter substrate-binding protein	116.16	208.06	158.59	110.16	148.243	45.3313	84.66	910.09	417.91	470.887	415.257	1.18046	0.0712729
TKVG1_08560	TKV_RS08295		sugar ABC transporter permease	50.76	98.57	69.76	58.56	69.4125	20.9442	59.73	353.14	162.7	191.857	148.862	1.114	0.0698428
TKVG1_08555	TKV_RS08290			43.5	90.76	62.63	52.26	62.2875	20.529	48.93	293.44	133.54	158.637	124.172	1.01871	0.10154
TKVG1_08550	TKV_RS08275		acyl-CoA dehydratase activase-related protein	5.46	6.82	2.13	1.98	4.0975	2.42372	15.8	15.8	10.69	14.0967	2.95026	1.40732	0.0064882
TKVG1_08545	TKV_RS08270		2-hydroxyacyl-CoA dehydratase	35.8	30.51	14.77	28.25	27.3325	8.95271	44.9	39.51	29.6	38.0033	7.76048	0.395971	0.320519
TKVG1_08540	TKV_RS08265		helix-turn-helix domain-containing protein	124.37	131.5	75.56	126.22	114.412	26.0772	116.08	123.13	98.02	112.41	12.9511	-0.0668097	0.852867
TKVG1_08535	TKV_RS08260		glycoside hydrolase family 13 protein, CBM34 / GH13 family	123.52	109.34	77.02	112.78	105.665	20.0289	142.62	118.83	106.91	122.787	18.1808	0.150431	0.550636
TKVG1_08530	TKV_RS08255		hypothetical protein	62.24	49.07	24.9	51.36	46.8925	15.7471	74.04	54.48	53.21	60.5767	11.6769	0.279546	0.527289
TKVG1_08525	TKV_RS08250	whiA	DNA-binding protein WhiA	232.54	222.37	154.73	218.67	207.077	35.3876	242.75	169.31	172.04	194.7	41.6349	-0.156597	0.508263
TKVG1_08520	TKV_RS08245		HPr family phosphocarrier protein	343.65	275.23	265.48	410.73	323.773	67.6045	237.93	162.08	123.44	174.483	58.2441	-0.915502	0.00698313
TKVG1_08515	TKV_RS08240		DRTGG domain-containing protein	254.54	250.13	242.88	260.25	251.95	7.32974	202.44	179.02	101.12	160.86	53.045	-0.686826	0.0447939
TKVG1_08510	TKV_RS08235		DNA polymerase III subunit alpha	240.32	220.74	190.6	208.91	215.142	20.868	191.12	148.46	106.09	148.557	42.5151	-0.592491	0.0315082
TKVG1_08505	TKV_RS08230		hypothetical protein	445.01	461.61	328.58	419.57	413.692	59.3171	335.43	273.63	198.27	269.11	68.6916	-0.664394	0.0169607
TKVG1_08500	TKV_RS08225	pfkA	6-phosphofructokinase	439.94	326.16	230.52	422.06	354.67	96.6754	360.65	181.11	197.58	246.447	99.2452	-0.569639	0.120397
TKVG1_08495	TKV_RS08220	pyk	pyruvate kinase	623.21	455.71	316.93	584.44	495.073	138.672	554.04	232.36	268.8	351.733	176.148	-0.541194	0.183034
TKVG1_08490	TKV_RS08215		thioesterase family protein	305.6	280.86	197.93	323.51	276.975	55.5221	243.06	110.22	102.92	152.067	78.887	-0.891353	0.018202
TKVG1_08485	TKV_RS08205	rlmD	23S rRNA (uracil(1939)-C(5))-methyltransferase RlmD	79.1	60.05	41.04	55.47	58.915	15.7068	65.03	43.5	43.57	50.7	12.4102	-0.269672	0.393294
TKVG1_08480	TKV_RS08200		SWIM zinc finger family protein	68.38	48.29	46.5	58.33	55.375	10.1131	53.04	52.61	38.68	48.11	8.16945	-0.251706	0.430804
TKVG1_08475	TKV_RS12465		hypothetical protein	95.15	85.73	88.47	51.08	80.1075	19.7519	107.8	81.63	98.63	96.02	13.2788	0.173861	0.715529
TKVG1_08470	TKV_RS08195		hypothetical protein	56.79	55.85	37.32	43.78	48.435	9.48684	51.46	50.99	50.67	51.04	0.397366	0.0240075	0.954913
TKVG1_08465	TKV_RS08190		hypothetical protein	40.2	55.02	42.57	39.51	44.325	7.24943	54.89	36.26	45.39	45.5133	9.31561	-0.0338004	0.940208
TKVG1_08460	TKV_RS08185		MATE family efflux transporter	63.44	70.75	50.13	66.21	62.6325	8.86297	80.53	55.67	58.53	64.91	13.6027	-0.0225614	0.937927
TKVG1_08455	TKV_RS08180	cimA	citramalate synthase	165.77	112.84	127.15	133.4	134.79	22.3746	112.6	88.21	101.4	100.737	12.2085	-0.474207	0.0873163
TKVG1_08450	TKV_RS08175		DUF1848 domain-containing protein	37.07	41.74	28.95	32.8	35.14	5.50989	61.2	38.76	56.47	52.1433	11.8291	0.47486	0.119714
TKVG1_08445	TKV_RS08170	pepT	peptidase T	385.05	390.91	235.7	438.31	362.493	87.8275	504.57	336.7	208.32	349.863	148.563	-0.123013	0.782133
TKVG1_08440	TKV_RS08165		nitroreductase family protein	607.72	645.89	313.6	686.87	563.52	169.719	694.36	442.58	293.84	476.927	202.457	-0.288399	0.507083
TKVG1_08435	TKV_RS08160		glucose-6-phosphate isomerase	254.66	216.44	177.59	220.57	217.315	31.5388	264.7	165.39	124.23	184.773	72.2132	-0.309697	0.354118
TKVG1_08430	TKV_RS08155	glgP	alpha-glucan family phosphorylase	115.1	135.68	110.48	98.02	114.82	15.6662	101.58	182.49	113.51	132.527	43.6787	0.157964	0.736159
TKVG1_08425	TKV_RS08150		homocysteine S-methyltransferase family protein	930.96	804.91	1338.38	825.46	974.928	248.514	628.22	558.98	304.36	497.187	170.544	-0.963796	0.0317278
TKVG1_08420	TKV_RS08145		YbaK/EbsC family protein	700.1	617.76	1045.19	652.29	753.835	197.149	492.35	397.64	284.93	391.64	103.84	-0.957033	0.0217927
TKVG1_08415	TKV_RS08140		manganese catalase family protein	138.27	119.7	204.77	108.01	142.688	43.2231	116.41	65.57	48.06	76.68	35.5036	-0.904891	0.0590319
TKVG1_08410	TKV_RS08135		spore coat protein CotJB	55.89	29.08	57.08	27.37	42.355	16.3381	31.34	20.8	22.14	24.76	5.7377	-0.738107	0.165095
TKVG1_08405	TKV_RS12460		spore coat associated protein CotJA	16.74	7.04	28.83	16.4	17.2525	8.93165	5.81	2.89	21.89	10.1967	10.2314	-0.478971	0.514383
TKVG1_08400	TKV_RS08130	rlmD	23S rRNA (uracil(1939)-C(5))-methyltransferase RlmD	55.76	59.52	60.4	53.29	57.2425	3.31546	76.09	36.32	48.39	53.6	20.3905	-0.191111	0.607951
TKVG1_08395	TKV_RS08125		hypothetical protein	135.19	164.08	155.01	106.49	140.192	25.502	177.28	136.6	119.29	144.39	29.7695	-0.0389115	0.93268
TKVG1_08390	TKV_RS08120		patatin-like phospholipase family protein	26.03	31.94	20.72	28.22	26.7275	4.6895	48.49	18.68	27.64	31.6033	15.2951	0.127435	0.778135
TKVG1_08385	TKV_RS13565		glycerol-3-phosphate acyltransferase	25.47	32.63	15.92	36.12	27.535	8.92251	22.09	37.58	18.41	26.0267	10.1733	-0.0842202	0.904286
TKVG1_08380	TKV_RS13560		hypothetical protein	56.9	54.87	44.08	30.69	46.635	12.0271	47.09	28.26	43.05	39.4667	9.91325	-0.275551	0.547191
TKVG1_08375	TKV_RS08110		HIRAN domain-containing protein	83.17	65.25	50.85	71.01	67.57	13.4181	94.28	55	70.04	73.1067	19.8188	0.0347043	0.934114
TKVG1_08370	TKV_RS08105		replication-associated recombination protein A	67.03	67.12	43.13	66.77	61.0125	11.9226	94.95	53.65	53.34	67.3133	23.9346	0.0535961	0.886717
TKVG1_08365	TKV_RS08100		YgiT-type zinc finger protein	71.35	80.41	77.65	86.49	78.975	6.28306	129.8	66.92	136.86	111.193	38.504	0.37385	0.379016
TKVG1_08360	TKV_RS08095		hypothetical protein	96.62	74.32	62.33	85.56	79.7075	14.7342	107.47	54.83	93.39	85.23	27.2522	0.0206131	0.966104
TKVG1_08355	TKV_RS08090		RluA family pseudouridine synthase	28.52	26.23	13.77	18.38	21.725	6.85415	48.13	19.35	28.51	31.9967	14.7034	0.422642	0.345837
TKVG1_08350	TKV_RS08085		radical SAM protein	14.61	15.53	12.45	17.25	14.96	1.9993	30.9	14.4	25.31	23.5367	8.39172	0.517373	0.19724
TKVG1_08340	TKV_RS08080		nucleoside kinase	109.67	102.62	68.71	86.81	91.9525	18.2059	113.47	109.99	60.94	94.8	29.3752	-0.0143781	0.979041
TKVG1_08335	TKV_RS08075		stalk domain-containing protein	364.1	368.47	263.78	464.04	365.098	81.7868	273.47	131.01	104.89	169.79	90.7343	-1.10608	0.0043871
TKVG1_08330	TKV_RS08070	cobN	cobaltochelatase subunit CobN	145.14	139.81	148.91	158.98	148.21	8.09254	121.93	76.72	70.35	89.6667	28.1218	-0.793028	0.00461928
TKVG1_08325	TKV_RS08065		ATP-binding cassette domain-containing protein	120.88	126.55	178.78	113.35	134.89	29.7553	77.23	73.67	74.23	75.0433	1.9143	-0.860887	0.0271329
TKVG1_08320	TKV_RS08060		ABC transporter permease	52.24	56.54	85.02	43.26	59.265	18.0394	38.5	39.36	42.19	40.0167	1.93066	-0.585557	0.204197
TKVG1_08315	TKV_RS08055		radical SAM protein	37.07	41.9	68.77	40.48	47.055	14.6179	32.75	26.44	27.46	28.8833	3.38725	-0.726712	0.10915
TKVG1_08310	TKV_RS12850		hypothetical protein	100.76	93.4	141.48	61.41	99.2625	32.9228	48.13	23.21	67.25	46.1967	22.0836	-0.965606	0.0825071
TKVG1_08305	TKV_RS08050		stalk domain-containing protein	51.94	79.45	95.52	64.62	72.8825	18.8188	41.09	62.14	50.75	51.3267	10.5368	-0.507001	0.284935
TKVG1_08300			cobaltochelatase subunit CobN	40.83	70.15	98.73	41.84	62.8875	27.4891	39.57	232.09	190.83	154.163	101.362	0.907186	0.160637
TKVG1_08295	TKV_RS02515		MotA/TolQ/ExbB proton channel family protein	41.29	65.82	64.28	27.61	49.75	18.5393	26.99	138.73	114.77	93.4967	58.8292	0.665784	0.307143
TKVG1_08290			DUF2149 domain-containing protein	40.29	56.14	64.19	31.05	47.9175	15.0011	32.25	142.02	134.76	103.01	61.3874	0.81131	0.193992
TKVG1_08285	TKV_RS13115		ATP-binding protein	39.65	45.82	52.39	29.36	41.805	9.79259	23.18	34.54	34.77	30.83	6.62609	-0.442151	0.3541
TKVG1_08280	TKV_RS13120		VWA domain-containing protein	41.64	53.33	75.16	39.01	52.285	16.4712	17.3	25.97	30.72	24.6633	6.80475	-0.983252	0.0515185
TKVG1_08275	TKV_RS02530		ATP-binding cassette domain-containing protein	33.34	38.78	80.2	26.71	44.7575	24.1383	22.3	32.43	32.23	28.9867	5.79169	-0.580734	0.326636
TKVG1_08270	TKV_RS02535		ABC transporter permease	24.89	25.61	56.09	22.6	32.2975	15.9135	12.16	29.27	20.98	20.8033	8.55637	-0.550684	0.36733
TKVG1_08265	TKV_RS02540		ABC transporter permease	23.63	30.85	41.84	21.52	29.46	9.16931	12.26	22.75	19.12	18.0433	5.32724	-0.640238	0.228325
TKVG1_08260	TKV_RS02545		iron ABC transporter substrate-binding protein	33.94	42.6	59.5	23.34	39.845	15.2883	16.17	33.49	26.73	25.4633	8.7292	-0.578392	0.309117
TKVG1_08255	TKV_RS02550		DUF364 domain-containing protein	24.27	30.65	45.8	21	30.43	11.0024	9.69	30.96	17.86	19.5033	10.7298	-0.540031	0.372792
TKVG1_08250	TKV_RS02555		flavin reductase family protein	23.21	44.56	66.58	25.4	39.9375	20.1853	9.16	30.55	33.11	24.2733	13.151	-0.563733	0.3859
TKVG1_08245	TKV_RS02560		ABC transporter substrate-binding protein	29.63	42.97	57.62	30.97	40.2975	13.0129	14.69	31.54	32.46	26.23	10.0045	-0.556234	0.324076
TKVG1_08240	TKV_RS02565		ABC transporter substrate-binding protein	20.15	46.17	59.82	20.44	36.645	19.685	21.28	58.19	35.21	38.2267	18.639	-0.0020158	0.998021
TKVG1_08235	TKV_RS02570		iron ABC transporter permease	18.49	25.87	50.47	14.87	27.425	16.0307	15.37	23.81	25.44	21.54	5.40517	-0.348969	0.583431
TKVG1_08230	TKV_RS02575		ABC transporter ATP-binding protein	26.28	29.35	54.76	16.94	31.8325	16.1704	19.54	45.4	45.16	36.7	14.8615	0.103192	0.887074
TKVG1_08225	TKV_RS02580		TVP38/TMEM64 family protein	101.76	69.53	61.95	85.72	79.74	17.7141	124.63	55.18	90.19	90	34.7254	0.0798628	0.852867
TKVG1_08220	TKV_RS02585		amidohydrolase	203.04	254.36	203.28	212.82	218.375	24.4186	229.73	208.8	177.89	205.473	26.0796	-0.153777	0.567385
TKVG1_08215	TKV_RS13905		arginine deiminase family protein	16.66	17.51	14.68	15.7	16.1375	1.22099	31.89	14.56	28.6	25.0167	9.20394	0.492646	0.280534
TKVG1_08210	TKV_RS13910		arginine deiminase family protein	6.66	2	7.93	8.84	6.3575	3.03946	20.76	6.58	5.74	11.0267	8.43977	0.405863	0.575034
TKVG1_08205	TKV_RS02595	argF	ornithine carbamoyltransferase	171.62	156.51	131.94	171.28	157.838	18.6467	130.89	109.87	64.07	101.61	34.1672	-0.671164	0.0453193
TKVG1_08200	TKV_RS02600	arcC	carbamate kinase	303.65	241.35	253.41	289.76	272.043	29.4513	245.23	189.28	114.91	183.14	65.3766	-0.619818	0.0771745
TKVG1_08195	TKV_RS02605		ECF transporter S component	278.34	457.72	410.54	381.85	382.112	75.9241	374.4	221.35	270.42	288.723	78.1494	-0.474793	0.193291
TKVG1_08190	TKV_RS02610	tsaE	tRNA (adenosine(37)-N6)-threonylcarbamoyltransferase complex ATPase subunit type 1 TsaE	66.52	56	37.13	45.85	51.375	12.7044	85.63	46.11	71.65	67.7967	20.0398	0.303992	0.415528
TKVG1_08185	TKV_RS02615	tsaB	tRNA (adenosine(37)-N6)-threonylcarbamoyltransferase complex dimerization subunit type 1 TsaB	95.41	83.07	55.81	70.67	76.24	16.9563	159.59	50.1	119.42	109.703	55.388	0.385642	0.39564
TKVG1_08180	TKV_RS02620	rimI	ribosomal protein S18-alanine N-acetyltransferase	129.02	119.53	77.48	102.5	107.133	22.6089	239.34	91.56	166.14	165.68	73.8911	0.493808	0.212936
TKVG1_08175	TKV_RS02625	tsaD	tRNA (adenosine(37)-N6)-threonylcarbamoyltransferase complex transferase subunit TsaD	99.8	78.57	59.96	107.35	86.42	21.4386	177.27	75.1	126	126.123	51.0851	0.416814	0.293601
TKVG1_08170	TKV_RS02630		ABC-F family ATP-binding cassette domain-containing protein	47.85	30.57	27.7	40	36.53	9.19554	48.58	26.23	33.27	36.0267	11.4272	-0.0960226	0.808687
TKVG1_08165	TKV_RS02635		flagellar motor protein	69.81	75.06	37.01	66.52	62.1	17.0924	102.75	64.89	73.42	80.3533	19.8595	0.289441	0.392958
TKVG1_08160	TKV_RS02640		flagellar motor protein MotB	159.31	130.58	105.4	151.91	136.8	24.2189	559.93	319.26	459.13	446.107	120.862	1.55669	1.12917e-11
TKVG1_08155	TKV_RS02645		redox-sensing transcriptional repressor Rex	294.09	243.14	216.02	253.71	251.74	32.3897	36.58	27.09	20.83	28.1667	7.93001	-3.08718	1.13219e-46
TKVG1_08150	TKV_RS02650		hypothetical protein	82.18	78.72	52.18	49.75	65.7075	17.1105	533.8	249.23	441.67	408.233	145.202	2.35181	6.12004e-15
TKVG1_08145	TKV_RS02655		LytTR family DNA-binding domain-containing protein	80.09	56.42	60.09	54.93	62.8825	11.6748	460.56	197.7	360.12	339.46	132.642	2.14716	2.53828e-12
TKVG1_08140	TKV_RS02660		GHKL domain-containing protein	50.57	41.82	41.02	48.34	45.4375	4.73876	281.08	116.68	198.87	198.877	82.2	1.88038	1.78791e-10
TKVG1_08135	TKV_RS02665		accessory gene regulator B family protein	36.54	29.99	24.75	35.1	31.595	5.35936	119.33	86.75	122.07	109.383	19.6489	1.63608	1.78791e-10
TKVG1_08130	TKV_RS12245		cyclic lactone autoinducer peptide	7105.52	8123.39	5541.64	9867.03	7659.4	1814.81	13749	16242.4	10863.9	13618.5	2691.65	0.733474	0.0358995
TKVG1_08125	TKV_RS02670		Asp23/Gls24 family envelope stress response protein	825.12	717.03	508.68	813.67	716.125	146.548	693.59	764.6	523.17	660.453	124.079	-0.15426	0.65527
TKVG1_08120	TKV_RS02675		sulfide/dihydroorotate dehydrogenase-like FAD/NAD-binding protein	666.15	548.6	419.59	649.92	571.065	113.591	587.86	535.5	395.94	506.433	99.2067	-0.223595	0.454975
TKVG1_08115	TKV_RS02680	gltA	NADPH-dependent glutamate synthase	373.41	324.56	241.71	400.92	335.15	69.8396	354.83	294.26	243.61	297.567	55.6837	-0.227162	0.428799
TKVG1_08110	TKV_RS02685		glutamate synthase-related protein	2021.05	1365.83	2280.49	2099.3	1941.67	398.973	1685.94	1072.86	2139.98	1632.93	535.532	-0.30761	0.497347
TKVG1_08105	TKV_RS02690		DNA glycosylase	342.6	362.36	339.06	295.41	334.858	28.2259	351.75	280.31	343.26	325.107	39.0266	-0.11399	0.69439
TKVG1_08100	TKV_RS02695		DUF554 domain-containing protein	460.36	491.4	404.36	437.08	448.3	36.7862	587.07	411.39	420.71	473.057	98.8483	-0.00428163	0.989191
TKVG1_08095	TKV_RS02700		HutP family protein	280.02	297.69	262.3	188.69	257.175	47.8881	477.09	292.53	391.67	387.097	92.365	0.473172	0.150662
TKVG1_08090	TKV_RS02705		S8 family peptidase	43.37	37.44	20.25	26.55	31.9025	10.4339	115.37	41.02	120	92.13	44.3231	1.26734	0.00645236
TKVG1_08085	TKV_RS02710		hypothetical protein	15.66	4.94	4.35	9.69	8.66	5.24326	38.81	14.43	58.28	37.1733	21.9708	1.40271	0.0304612
TKVG1_08080	TKV_RS02715		hypothetical protein	8.96	3.14	7.47	0	4.8925	4.09047	32.58	0	12.02	14.8667	16.4755	0.527853	0.467372
TKVG1_08075	TKV_RS02720		hypothetical protein	1.21	3.82	1.34	4.37	2.685	1.64439	17.69	0.35	17.34	11.7933	9.91176	1.10553	0.121958
TKVG1_08070	TKV_RS02725	groES	co-chaperone GroES	1827.92	1508.4	1954.52	1809.55	1775.1	189.118	1107.43	779.24	279.6	722.09	416.864	-1.21758	0.0123804
TKVG1_08065	TKV_RS02730	groL	chaperonin GroEL	4419.48	3757.36	4823.22	4584.99	4396.26	457.036	2835.94	2188.2	772.04	1932.06	1055.52	-1.12206	0.0191385
TKVG1_08055	TKV_RS02740	guaB	IMP dehydrogenase	921.69	648.06	685.27	681.64	734.165	126.134	925.92	522.34	433.1	627.12	262.587	-0.312574	0.384815
TKVG1_08050	TKV_RS02745	guaA	glutamine-hydrolyzing GMP synthase	1131.25	939.37	987.94	923.99	995.638	94.427	1099.6	749.09	447.91	765.533	326.156	-0.448081	0.24139
TKVG1_08045	TKV_RS02750		NCS2 family permease	1004.87	738.99	551.94	869.5	791.325	193.009	1247.41	1507.11	128.16	960.893	732.765	0.160523	0.830786
TKVG1_08040	TKV_RS02755	purE	5-(carboxyamino)imidazole ribonucleotide mutase	953.6	646.19	525.44	853.22	744.612	194.246	1069.42	992.26	95.75	719.143	541.251	-0.0944515	0.904286
TKVG1_08035	TKV_RS02760	purC	phosphoribosylaminoimidazolesuccinocarboxamide synthase	804.93	518.54	411.45	671.98	601.725	172.581	873.63	772.34	68.27	571.413	438.668	-0.11179	0.886717
TKVG1_08030	TKV_RS02765	purS	phosphoribosylformylglycinamidine synthase subunit PurS	671.47	513.4	400.36	561.08	536.577	112.381	746.84	664.21	52.36	487.803	379.361	-0.158326	0.835982
TKVG1_08025	TKV_RS02770	purQ	phosphoribosylformylglycinamidine synthase subunit PurQ	893.39	599.97	482.88	793.44	692.42	185.336	840.52	599.94	51.2	497.22	404.562	-0.405048	0.560926
TKVG1_08020	TKV_RS02775	purL	phosphoribosylformylglycinamidine synthase subunit PurL	702.34	443.92	365.56	618.43	532.562	154.86	500.88	293.88	30.13	274.963	235.944	-0.748897	0.264149
TKVG1_08015	TKV_RS02780	purF	amidophosphoribosyltransferase	883.74	521.38	420.91	715.23	635.315	205.793	541.58	301.04	40.76	294.46	250.475	-0.88267	0.169671
TKVG1_08010	TKV_RS02785	purM	phosphoribosylformylglycinamidine cyclo-ligase	830.63	493.21	391.22	655.43	592.622	192.387	512.4	291.01	37.24	280.217	237.764	-0.856472	0.186932
TKVG1_08005	TKV_RS02790	purN	phosphoribosylglycinamide formyltransferase	698.93	458.79	323.14	590.34	517.8	162.732	468.77	219.26	43.56	243.863	213.67	-0.902249	0.145367
TKVG1_08000	TKV_RS02795	purH	bifunctional phosphoribosylaminoimidazolecarboxamide formyltransferase/IMP cyclohydrolase	605.07	430.82	284.25	545.51	466.413	141.342	414.33	247.48	37.22	233.01	188.971	-0.818026	0.195778
TKVG1_07995	TKV_RS02800	purD	phosphoribosylamine--glycine ligase	577.33	355.14	278.65	522.72	433.46	139.96	387.21	201.26	37.59	208.687	174.928	-0.876988	0.158119
TKVG1_07990	TKV_RS02805	murI	glutamate racemase	85.92	51.61	31.76	62.92	58.0525	22.606	116.23	34.81	67.07	72.7033	41.0013	0.198046	0.723068
TKVG1_07985	TKV_RS02810		M20 family metallopeptidase	69.76	53.26	26.9	52.39	50.5775	17.6925	103.43	24.87	91.13	73.1433	42.2559	0.376403	0.503675
TKVG1_07980	TKV_RS02815		S-ribosylhomocysteine lyase	103.98	102.75	76.18	110.64	98.3875	15.2053	107.31	87.65	194.32	129.76	56.7682	0.31846	0.484037
TKVG1_07975	TKV_RS02820	spoVB	stage V sporulation protein B	17.59	10.32	8.11	13.03	12.2625	4.08199	24.02	12.28	65.01	33.77	27.6841	1.10727	0.0632734
TKVG1_07970	TKV_RS02825	hydG	[FeFe] hydrogenase H-cluster radical SAM maturase HydG	1395.6	1601.45	1495.33	1319.75	1453.03	122.31	1340.86	1507.83	1555.13	1467.94	112.567	-0.0421508	0.912354
TKVG1_07965	TKV_RS02830		BglG family transcription antiterminator	771.16	508.19	215.86	499.09	498.575	226.806	464.63	743.94	1886.43	1031.67	753.305	0.839235	0.160189
TKVG1_07960	TKV_RS02835		hypothetical protein	1131.97	742.46	353.28	698	731.428	318.679	447.82	1232.11	2164.44	1281.46	859.373	0.655494	0.286001
TKVG1_07955	TKV_RS02840		PTS sugar transporter subunit IIB	4364.33	2871.85	1202.63	2822.57	2815.35	1291.44	739.57	6679.69	5391.08	4270.11	3124.69	0.469578	0.494261
TKVG1_07950	TKV_RS02845		PTS transporter subunit EIIC	3271.01	2114.52	909.2	2076.11	2092.71	964.337	611.84	5347.3	4495.71	3484.95	2524.36	0.565176	0.400555
TKVG1_07945	TKV_RS02850		PTS lactose/cellobiose transporter subunit IIA	3700.56	2460.13	1119.11	2353.99	2408.45	1054.76	744.15	5413.97	4703.93	3620.68	2516.32	0.470278	0.481735
TKVG1_07940	TKV_RS02855		YerC/YecD family TrpR-related protein	83.15	89.94	52.88	52.06	69.5075	19.8704	82.44	106.84	213.68	134.32	69.8022	0.791883	0.124518
TKVG1_07935	TKV_RS02860	pcrA	DNA helicase PcrA	225.48	216.53	162.29	201.21	201.377	27.9189	163.92	177.79	134.75	158.82	21.9686	-0.379867	0.146921
TKVG1_07930	TKV_RS02865	ligA	NAD-dependent DNA ligase LigA	236.44	230.38	172.17	230.06	217.262	30.2046	198.68	170.1	128.73	165.837	35.1693	-0.443146	0.0740557
TKVG1_07925	TKV_RS02870	gatC	Asp-tRNA(Asn)/Glu-tRNA(Gln) amidotransferase subunit GatC	601.78	519.89	438.87	542.48	525.755	67.4362	427.13	394.3	260.41	360.613	88.3175	-0.585076	0.0447939
TKVG1_07920	TKV_RS02875	gatA	Asp-tRNA(Asn)/Glu-tRNA(Gln) amidotransferase subunit GatA	678.96	620.32	491.91	649.23	610.105	82.3533	587.66	530.88	314.93	477.823	143.898	-0.399806	0.221982
TKVG1_07915	TKV_RS02880	gatB	Asp-tRNA(Asn)/Glu-tRNA(Gln) amidotransferase subunit GatB	714.13	698.37	551.81	649.92	653.558	73.1277	641.42	559.59	347.22	516.077	151.85	-0.394502	0.203311
TKVG1_07910	TKV_RS02885		peptide ABC transporter substrate-binding protein	2746.12	3160.1	4309.55	2473.75	3172.38	808.927	2895.83	2134.4	3310.81	2780.35	596.647	-0.263692	0.557392
TKVG1_07905	TKV_RS02890		peptide ABC transporter substrate-binding protein	636.93	598.68	471.21	594.9	575.43	72.0271	761.12	500.57	641.66	634.45	130.425	0.0651045	0.783367
TKVG1_07900	TKV_RS02895		ABC transporter permease	522.43	480.36	400.24	427.09	457.53	54.5953	619.13	470.38	429.99	506.5	99.6091	0.0689695	0.772504
TKVG1_07895	TKV_RS02900		ABC transporter permease	439.46	441.61	460.3	400.93	435.575	24.9206	493.07	400.15	295.19	396.137	99.001	-0.218127	0.491236
TKVG1_07890	TKV_RS02905		ABC transporter ATP-binding protein	621.51	645.76	648.91	580.66	624.21	31.5086	643.56	605.28	386.92	545.253	138.45	-0.26314	0.433892
TKVG1_07885	TKV_RS02910		dipeptide ABC transporter ATP-binding protein	596.63	631.3	639.61	586.39	613.482	25.9366	543.49	539.09	348.78	477.12	111.167	-0.418317	0.199248
TKVG1_07880	TKV_RS12250			209.56	210.93	256.24	181.1	214.458	31.0641	218.18	166.8	172.52	185.833	28.1587	-0.281386	0.4434
TKVG1_07875	TKV_RS02920			332.58	316.64	352.83	281.71	320.94	30.0552	322.32	298.99	206.91	276.073	61.0225	-0.286457	0.395263
TKVG1_07870	TKV_RS13125		hypothetical protein	24.7	26.86	13.25	42.17	26.745	11.8917	65.86	46.1	74.52	62.16	14.5668	0.981379	0.0575434
TKVG1_07865	TKV_RS02925		N-acetylmuramoyl-L-alanine amidase family protein	366.74	485.58	361.62	303.17	379.278	76.5105	262.25	516.19	943.84	574.093	344.465	0.486889	0.378275
TKVG1_07860	TKV_RS02930	rph	ribonuclease PH	179.18	188.55	151.95	153.47	168.288	18.4001	169.18	164.96	407.76	247.3	138.978	0.453307	0.361354
TKVG1_07855	TKV_RS02935		XTP/dITP diphosphatase	301.23	277.61	249.5	235.6	265.985	29.2823	247.37	286.83	550.52	361.573	164.818	0.36303	0.434968
TKVG1_07850	TKV_RS02940		metallophosphoesterase	374.13	363.03	313.98	302.85	338.497	35.3241	338.33	348.19	649.66	445.393	176.969	0.321895	0.457366
TKVG1_07800	TKV_RS02990		HTH domain-containing protein	140.26	94.82	41.53	80.23	89.21	40.7905	210.56	66.24	139.82	138.873	72.1647	0.478155	0.362621
TKVG1_07795	TKV_RS02995		PTS sugar transporter subunit IIA	107.22	98.76	71.8	81.78	89.89	16.0419	177.62	56.72	101.17	111.837	61.1517	0.18404	0.698891
TKVG1_07790	TKV_RS03000		hypothetical protein	186.79	190.44	119.73	164.58	165.385	32.5113	235.65	144.55	150.65	176.95	50.9271	0.0193997	0.957553
TKVG1_07785	TKV_RS03005		PTS fructose transporter subunit IIB	210.53	222.28	165.99	134.82	183.405	40.4591	141.6	168.81	151.17	153.86	13.803	-0.282349	0.44507
TKVG1_07780	TKV_RS03010	yfcE	phosphodiesterase	237.99	295.1	280.87	291.74	276.425	26.3332	187.28	257.68	173.55	206.17	45.1341	-0.44607	0.233038
TKVG1_07775	TKV_RS03015		nitroreductase	310.18	390.05	289.26	342.67	333.04	43.902	302.29	313.71	197.95	271.317	63.7935	-0.341332	0.301041
TKVG1_07770	TKV_RS12705		transposase	313.88	383.86	239.53	351.47	322.185	62.0812	314.79	265.14	213.73	264.553	50.5326	-0.33627	0.228325
TKVG1_07765	TKV_RS03025		HD domain-containing protein	96.51	93.46	74.09	73.6	84.415	12.2702	136.84	114.52	114.71	122.023	12.832	0.448838	0.0837242
TKVG1_07760	TKV_RS03030		ABC transporter substrate-binding protein	28.88	20.15	18.67	13.61	20.3275	6.35214	52.2	16.34	61.1	43.2133	23.6946	0.835415	0.120908
TKVG1_07755	TKV_RS03035		branched-chain amino acid ABC transporter permease	9.05	11.59	5.3	6.62	8.14	2.77528	26.43	3.6	37.74	22.59	17.3909	0.988971	0.126235
TKVG1_07750	TKV_RS13915		hypothetical protein	7.33	6.61	9.31	5.4	7.1625	1.63824	23.54	6.84	37.94	22.7733	15.5642	1.14817	0.0670892
TKVG1_07745	TKV_RS13920		branched-chain amino acid ABC transporter permease	6.62	9.28	2.76	9.1	6.94	3.03952	23.52	7.31	25.52	18.7833	9.98639	1.06454	0.0709822
TKVG1_07740	TKV_RS03045		ABC transporter ATP-binding protein	6.26	7.38	5.69	10.76	7.5225	2.26963	27.07	6.33	38.34	23.9133	16.2368	1.18794	0.0491236
TKVG1_07735	TKV_RS03050		ABC transporter ATP-binding protein	12.34	11.06	12.14	10.22	11.44	0.988737	42.31	15.84	66.12	41.4233	25.1517	1.44525	0.0064882
TKVG1_07730	TKV_RS03055	phoU	phosphate signaling complex protein PhoU	104.67	74.44	63.84	57.88	75.2075	20.8014	252.12	77.46	317.6	215.727	124.138	1.2083	0.0191104
TKVG1_07725	TKV_RS12255			756.31	655.36	596.24	687.87	673.945	66.7367	939.74	603.26	922.56	821.853	189.502	0.20365	0.494186
TKVG1_07720	TKV_RS12260			0.79	0.56	0.59	0	0.485	0.339067	1.57	1.52	1.86	1.65	0.183576	0.937404	0.191595
TKVG1_07710	TKV_RS03075	tig	trigger factor	1377.28	1148.87	657.76	1352.14	1134.01	333.565	1830.93	710.15	1340.43	1293.84	561.841	0.097795	0.840485
TKVG1_07705	TKV_RS03080	clpP	ATP-dependent Clp endopeptidase proteolytic subunit ClpP	2808.54	2447.46	1796.43	2724.23	2444.16	458.54	3585.71	1985.45	3135.36	2902.17	825.221	0.165395	0.613386
TKVG1_07700	TKV_RS03085	clpX	ATP-dependent Clp protease ATP-binding subunit ClpX	3039.27	2715.39	1947.74	3032.77	2683.79	513.459	3746.1	2033.75	2963.48	2914.44	857.228	0.038887	0.915316
TKVG1_07695	TKV_RS03090	lon	endopeptidase La	1727.87	1485.24	1060.21	1557.59	1457.73	283.858	2214.96	1144.37	1425.94	1595.09	554.977	0.0415533	0.909562
TKVG1_07690	TKV_RS03095	yihA	ribosome biogenesis GTP-binding protein YihA/YsxC	921.89	842.16	664.11	825.07	813.308	108.045	1217.64	781.61	757.19	918.813	259.079	0.0894917	0.734871
TKVG1_07685	TKV_RS03100		DUF2294 domain-containing protein	584.97	621.66	543.02	431.22	545.217	82.5106	827.71	564.67	587.53	659.97	145.716	0.180451	0.547042
TKVG1_07680	TKV_RS03105		F0F1 ATP synthase subunit A	2908.59	3487.51	2807.63	3233.97	3109.42	310.845	2682.09	3345.74	2184.43	2737.42	582.629	-0.223769	0.512779
TKVG1_07675	TKV_RS03110	atpE	ATP synthase F0 subunit C	3302.51	3671.56	3387.61	3727.2	3522.22	208.736	2821.94	3951.62	2562.07	3111.88	738.756	-0.214419	0.567324
TKVG1_07670	TKV_RS03115	atpF	F0F1 ATP synthase subunit B	2492.47	2721.82	2358.13	2566.03	2534.61	151.609	2033.66	2585.25	1786.93	2135.28	408.746	-0.284403	0.378847
TKVG1_07665	TKV_RS03120	atpH	ATP synthase F1 subunit delta	2226.89	2553.9	2104.77	2353.8	2309.84	191.861	1882.36	2394.16	1630.2	1968.91	389.264	-0.266947	0.41693
TKVG1_07660	TKV_RS03125	atpA	F0F1 ATP synthase subunit alpha	3030.21	3299.47	2849.2	3164.89	3085.94	192.336	2468.81	3319.98	2415.52	2734.77	507.507	-0.209723	0.535485
TKVG1_07655	TKV_RS03130	atpG	ATP synthase F1 subunit gamma	2721.1	3189.94	2756.14	2873.96	2885.28	213.368	2259.69	3114.77	2454.4	2609.62	448.175	-0.180596	0.617921
TKVG1_07650	TKV_RS03135	atpD	F0F1 ATP synthase subunit beta	2919.97	3295	2976.91	2912.69	3026.14	181.523	2279.89	3346.73	2564.87	2730.5	552.369	-0.180775	0.636046
TKVG1_07645	TKV_RS03140		F0F1 ATP synthase subunit epsilon	2215.22	2520.91	2653.87	2304.9	2423.72	200.004	1870.33	2981.57	2210.29	2354.06	569.4	-0.0841708	0.852867
TKVG1_07640	TKV_RS03145		DMT family transporter	149	148.15	92.21	112.63	125.497	27.9233	188.18	198.11	145.13	177.14	28.1626	0.42806	0.163903
TKVG1_07635	TKV_RS03150		NAD+ synthase	165.18	149.63	98.47	148.75	140.507	29.0232	170.83	127.65	133.47	143.983	23.4313	-0.0262197	0.931108
TKVG1_07630	TKV_RS03155		ABC transporter permease	3.94	1.51	0	0.74	1.5475	1.71	6.93	3.09	5.41	5.14333	1.93384	1.04167	0.137448
TKVG1_07625	TKV_RS03160		ABC transporter ATP-binding protein	0.97	0.82	0	2.01	0.95	0.825308	2.13	1.8	1.96	1.96333	0.165025	0.52488	0.479561
TKVG1_07620	TKV_RS03165		ABC transporter substrate-binding protein	1.87	1.82	1.28	0.59	1.39	0.59649	0.57	1.16	1.45	1.06	0.448442	-0.233162	0.771265
TKVG1_07615	TKV_RS03170		O-antigen ligase family protein	64.77	62.67	42.82	67.47	59.4325	11.2479	60.61	76.62	50.77	62.6667	13.0471	0.0343867	0.935138
TKVG1_07610	TKV_RS13130		hypothetical protein	220.33	286.57	187.77	169.48	216.037	51.5102	260.07	241.93	231.93	244.643	14.2649	0.116243	0.759595
TKVG1_07605	TKV_RS03175			398.98	409.97	339.54	434.68	395.793	40.3639	395.13	377.29	382.82	385.08	9.1322	-0.0966521	0.715529
TKVG1_07600	TKV_RS03180		AAA family ATPase	76.2	88.02	75.54	76.48	79.06	5.98632	71.3	75.14	55.8	67.4133	10.2391	-0.283798	0.344391
TKVG1_07595	TKV_RS03185		UPF0175 family protein	218.46	219.56	191.32	209.03	209.592	13.0663	329.61	141.08	498.48	323.057	178.79	0.477404	0.345837
TKVG1_07590	TKV_RS13325		hypothetical protein	144.92	171.38	148.15	118.83	145.82	21.5098	237.04	111.82	335.23	228.03	111.977	0.492931	0.321099
TKVG1_07585	TKV_RS13330		DUF3368 domain-containing protein	155.47	127.26	172.76	129.31	146.2	21.8736	219.92	130.93	383.2	244.683	127.945	0.569935	0.266344
TKVG1_07580	TKV_RS03195		Rpn family recombination-promoting nuclease/putative transposase	226.41	216.22	168.3	176.14	196.768	28.8269	203.2	184.9	204.16	197.42	10.8533	-0.0511281	0.852867
TKVG1_07575	TKV_RS03200		DegT/DnrJ/EryC1/StrS family aminotransferase	268.84	283.42	193.74	244.59	247.648	39.3453	297.43	277.91	241.51	272.283	28.3814	0.0782306	0.759433
TKVG1_07570	TKV_RS03205		nucleotide sugar dehydrogenase	320.45	309.85	220.98	286.53	284.452	44.6241	393.76	329.96	298.43	340.717	48.5668	0.19322	0.358652
TKVG1_07565	TKV_RS03210		Gfo/Idh/MocA family oxidoreductase	287.59	294.54	216.37	269.83	267.082	35.3731	327.87	302.65	272	300.84	27.9789	0.109719	0.622748
TKVG1_07560	TKV_RS03215		N-acetyltransferase	184.68	205.19	151.27	176.72	179.465	22.297	246.45	210.14	183.1	213.23	31.7878	0.174449	0.451462
TKVG1_07555	TKV_RS13790		UDP-N-acetyl glucosamine 2-epimerase	222.18	214.93	173.5	211.35	205.49	21.7973	246.92	230.95	190.47	222.78	29.0983	0.0509306	0.849657
TKVG1_07550	TKV_RS13795		UDP-N-acetylglucosamine 2-epimerase	175.36	167.16	127.16	139.49	152.292	22.7208	175.32	160.32	134.52	156.72	20.6369	-0.0231023	0.947567
TKVG1_07545	TKV_RS03225		glycosyltransferase, GT4 family	207.34	279.43	177.54	202.61	216.73	43.7976	237.17	268.44	182.92	229.51	43.2715	0.0301738	0.940208
TKVG1_07540	TKV_RS03230		glycosyltransferase family A protein	213.4	248.43	194.43	190.07	211.582	26.5709	255.99	258.38	198.42	237.597	33.949	0.0989819	0.755752
TKVG1_07535	TKV_RS03235		glycosyltransferase, GTnC family	91.92	108.02	74.76	74.48	87.295	16.0444	106.27	127.58	89.23	107.693	19.2146	0.240861	0.484037
TKVG1_07530	TKV_RS03240		O-antigen ligase family protein	50.09	48.28	41.91	31.67	42.9875	8.32071	67.94	68.11	46.79	60.9467	12.2603	0.407501	0.260088
TKVG1_07525	TKV_RS03245		glycosyltransferase family 4 protein	53.91	57.75	40.88	50.87	50.8525	7.21976	80.8	56.21	69.39	68.8	12.3056	0.355747	0.144643
TKVG1_07520	TKV_RS03260		sugar transferase	41.58	45.22	27.24	40.41	38.6125	7.85345	79.1	58.4	60.91	66.1367	11.2965	0.673182	0.0204699
TKVG1_07515	TKV_RS03265		acetyltransferase	58.48	66.34	63.26	50.76	59.71	6.78662	68.91	70.4	61.7	67.0033	4.65285	0.0915446	0.807401
TKVG1_07510	TKV_RS03270		DegT/DnrJ/EryC1/StrS family aminotransferase	68.46	66.36	55.68	61.08	62.895	5.72497	90.06	83.79	60.22	78.0233	15.7336	0.230011	0.427035
TKVG1_07505	TKV_RS03275		nucleoside-diphosphate sugar epimerase/dehydratase	38.98	40.65	33.11	28.57	35.3275	5.54529	37.18	34.59	35.84	35.87	1.29526	-0.0411765	0.90903
TKVG1_07500	TKV_RS03280		SDR family oxidoreductase	31.95	23.21	24.88	27.3	26.835	3.80097	33.22	34.27	26.62	31.37	4.14699	0.144628	0.70111
TKVG1_07495	TKV_RS03285		TerB N-terminal domain-containing protein	26.6	27.47	19.65	19.3	23.255	4.38153	27.94	25.09	25.41	26.1467	1.56129	0.102414	0.755752
TKVG1_07490	TKV_RS03290		ATP-binding protein	41.22	49.65	52.61	28.76	43.06	10.685	41.19	53.52	35.74	43.4833	9.10915	-0.0500301	0.92949
TKVG1_07485	TKV_RS03295		DEAD/DEAH box helicase	31.8	36.93	40.02	30.62	34.8425	4.40645	27.34	38.27	27.46	31.0233	6.27608	-0.210874	0.621673
TKVG1_07480	TKV_RS12715			56.02	60.06	49.8	32.36	49.56	12.2186	65.53	56.77	32.68	51.66	17.0107	-0.00781016	0.991106
TKVG1_07475	TKV_RS03300			29.95	27.69	33.86	15.45	26.7375	7.94492	14.34	28.55	14.54	19.1433	8.14703	-0.452883	0.444647
TKVG1_07470	TKV_RS12265			35.06	12.76	20.98	19.47	22.0675	9.36953	10.69	20.19	4.07	11.65	8.10276	-0.585386	0.400555
TKVG1_07465	TKV_RS13340			47.08	18.56	45.77	37.94	37.3375	13.1527	46.67	32.19	13.32	30.7267	16.7231	-0.266059	0.702596
TKVG1_07460	TKV_RS03305		GerMN domain-containing protein	132.61	108.09	122.85	126.44	122.498	10.4164	126.92	84.45	92.76	101.377	22.508	-0.350526	0.206814
TKVG1_07455	TKV_RS03310		SdpI family protein	158.82	190.04	168.91	194.86	178.157	17.1233	160.93	172.54	125.27	152.913	24.6336	-0.273527	0.388385
TKVG1_07450	TKV_RS03315		plasmid pRiA4b ORF-3 family protein	198.6	195.38	183.97	194.06	193.002	6.31635	203.01	195.91	182.88	193.933	10.2095	-0.0586302	0.829028
TKVG1_07445	TKV_RS03320		Uma2 family endonuclease	224.02	279.35	231.23	202.39	234.248	32.4697	228.85	218.7	249.47	232.34	15.6791	-0.070675	0.83954
TKVG1_07440	TKV_RS03325		Rpn family recombination-promoting nuclease/putative transposase	66.7	62.2	55.29	51.88	59.0175	6.683	125.72	48.63	110.77	95.04	40.8814	0.539551	0.189376
TKVG1_07435	TKV_RS03330		MoxR family ATPase	9.69	12.42	13.33	8.86	11.075	2.13842	22.83	15.43	18.93	19.0633	3.7018	0.633605	0.0896673
TKVG1_07430	TKV_RS03335		hypothetical protein	33.36	29.71	31.41	25.49	29.9925	3.3517	30	30.38	34.89	31.7567	2.72019	0.0159216	0.973965
TKVG1_07425	TKV_RS03340		TM2 domain-containing protein	134.04	106.13	154.2	84.2	119.642	30.7694	103.07	71.25	86.42	86.9133	15.9157	-0.510982	0.228607
TKVG1_07420	TKV_RS03345		RDD family protein	101.72	88.18	144.95	84.48	104.833	27.7527	68.1	63.14	68.09	66.4433	2.86077	-0.675791	0.120397
TKVG1_07415	TKV_RS12995		heme NO-binding domain-containing protein	18.82	19.79	2.2	2.04	10.7125	9.92988	52.06	26.24	98.65	58.9833	36.6981	1.49296	0.0291829
TKVG1_07410	TKV_RS12725		heme NO-binding domain-containing protein	17.35	28.8	13.53	8.48	17.04	8.64074	40.58	34.88	54.34	43.2667	10.0043	1.11988	0.0233503
TKVG1_07405	TKV_RS12730		methyl-accepting chemotaxis protein	178.55	174.43	184.08	144.85	170.478	17.5365	194.96	196.17	211.31	200.813	9.11049	0.160379	0.640575
TKVG1_07400	TKV_RS03355		hypothetical protein	355.92	393.46	321.12	347.56	354.515	29.9014	363.94	336.63	318.96	339.843	22.6615	-0.123278	0.586788
TKVG1_07395	TKV_RS03360	htpX	zinc metalloprotease HtpX	321.22	361.48	286.45	293.27	315.605	34.0828	362.24	292.98	283.52	312.913	42.9792	-0.0844136	0.721299
TKVG1_07390	TKV_RS03365		LemA family protein	396.65	496.02	377.32	462.5	433.123	55.5677	471.49	335.47	356.27	387.743	73.2686	-0.233193	0.337453
TKVG1_07385	TKV_RS03370	yfcE	phosphodiesterase	99.72	119.72	87.77	108.54	103.938	13.5332	113.16	111.52	74.16	99.6133	22.0585	-0.119983	0.735334
TKVG1_07380	TKV_RS03375			99.63	106.07	68.75	78.22	88.1675	17.5867	86.5	125.35	55.85	89.2333	34.8305	-0.0180059	0.979041
TKVG1_07375	TKV_RS03380		RtcB family protein	112.34	115.35	105.88	95.39	107.24	8.83278	105.8	103.04	78.69	95.8433	14.9192	-0.224448	0.441278
TKVG1_07370			IS3 family transposase	377.5	370.25	281.53	324.44	338.43	44.618	356.19	342.46	235.23	311.293	66.2295	-0.176439	0.54549
TKVG1_07365	TKV_RS03395		hypothetical protein	548.85	671.92	541.7	593.94	589.102	59.8593	610.95	624.35	385.19	540.163	134.378	-0.184784	0.602546
TKVG1_07360	TKV_RS03400		putative toxin-antitoxin system toxin component,PIN family	316.94	364.52	221.56	288.29	297.827	59.7798	348.58	333.08	228.09	303.25	65.5502	-0.0306472	0.936307
TKVG1_07355	TKV_RS03405		nucleotidyltransferase domain-containing protein	278.95	287.56	175.96	215	239.368	53.2403	268.14	210.78	168.96	215.96	49.7925	-0.205284	0.505085
TKVG1_07350	TKV_RS03410		hypothetical protein	271.81	268.91	161.51	249.77	238	51.9224	254.18	235.7	166.07	218.65	46.4636	-0.16985	0.613532
TKVG1_07345	TKV_RS03415		phenylpyruvate tautomerase MIF-related protein	215.35	206.75	182.12	184.89	197.278	16.3253	246.81	170.6	120.19	179.2	63.7466	-0.218818	0.525968
TKVG1_07340	TKV_RS03420		TIGR02677 family protein	146.13	149.6	99.73	126.3	130.44	22.9021	206.19	111.37	120.39	145.983	52.3352	0.07061	0.835982
TKVG1_07335	TKV_RS03425		TIGR02678 family protein	172.57	163.86	129.81	158.83	156.268	18.5291	225.47	128.42	150.29	168.06	50.9068	0.016656	0.958927
TKVG1_07330	TKV_RS03430		TIGR02680 family protein	165	158.02	140.71	135.12	149.713	14.1033	180.38	128.61	109.36	139.45	36.73	-0.184172	0.487112
TKVG1_07325	TKV_RS03435		TIGR02679 family protein	132.94	152.74	136.36	103.28	131.33	20.6	132.79	112.08	89.52	111.463	21.6416	-0.304047	0.354118
TKVG1_07320	TKV_RS03440		nucleotidyltransferase domain-containing protein	151.59	186.77	179.45	158.4	169.052	16.7375	174.17	139.97	124.23	146.123	25.5323	-0.285761	0.361051
TKVG1_07315	TKV_RS03445		DUF86 domain-containing protein	113.6	155.14	114.36	89.13	118.058	27.3584	119.36	106.98	92.77	106.37	13.3055	-0.206365	0.572768
TKVG1_07310	TKV_RS03450		MBL fold metallo-hydrolase	135	151.22	154.29	119.88	140.097	15.9151	115.58	115.12	80.3	103.667	20.2374	-0.485186	0.149162
TKVG1_07305	TKV_RS03460	pdxS	pyridoxal 5'-phosphate synthase lyase subunit PdxS	161.55	86.91	165.89	128.52	135.718	36.5681	121.71	75.19	54.66	83.8533	34.3543	-0.727848	0.109018
TKVG1_07300	TKV_RS03465	pdxT	pyridoxal 5'-phosphate synthase glutaminase subunit PdxT	316.85	223.4	330.27	321.76	298.07	50.0878	234.24	149.3	117.91	167.15	60.1842	-0.875099	0.0191681
TKVG1_07295	TKV_RS03470		amino acid permease	490.88	504.87	326.8	559.86	470.602	100.385	504.85	402.47	217.93	375.083	145.407	-0.370477	0.354829
TKVG1_07290	TKV_RS03475	loaP	antiterminator LoaP	76.98	78.94	39.94	76.91	68.1925	18.8585	89.87	64.25	39.65	64.59	25.1117	-0.135876	0.772321
TKVG1_07285	TKV_RS03480	glmM	phosphoglucosamine mutase	405.3	377.26	262.04	385.12	357.43	64.6806	371.3	268.28	185.46	275.013	93.1028	-0.433008	0.175992
TKVG1_07280	TKV_RS03485	galU	UTP--glucose-1-phosphate uridylyltransferase GalU	259.4	275.88	187.83	241.78	241.222	38.2214	284.31	206.12	182.09	224.173	53.4479	-0.175268	0.47813
TKVG1_07275	TKV_RS03490		Wzz/FepE/Etk N-terminal domain-containing protein	190.96	178.61	130.6	180.33	170.125	26.9101	210.94	169.33	118.98	166.417	46.0492	-0.099727	0.765717
TKVG1_07270	TKV_RS13925			213.31	243.03	134.61	198.16	197.278	45.7469	242.88	178.26	151.96	191.033	46.7865	-0.108961	0.739782
TKVG1_07265	TKV_RS03500		CpsD/CapB family tyrosine-protein kinase	256.05	205.85	142.49	224.81	207.3	47.9082	242.67	189.2	165.64	199.17	39.471	-0.115612	0.715529
TKVG1_07260	TKV_RS03505		CpsB/CapC family capsule biosynthesis tyrosine phosphatase	219.58	165.66	109.14	164.09	164.618	45.0925	222.87	132.9	120.56	158.777	55.8483	-0.121834	0.755752
TKVG1_07255	TKV_RS03510		LCP family protein	319.23	258.18	125.99	228.96	233.09	80.6992	344.8	187.23	251.2	261.077	79.248	0.0937869	0.835028
TKVG1_07250	TKV_RS03515		membrane protein	7.77	4.37	2.47	0.57	3.795	3.07069	9.35	6.07	7.25	7.55667	1.66136	0.66693	0.324076
TKVG1_07245	TKV_RS03520		DUF2225 domain-containing protein	404.35	417.95	250.15	456.38	382.207	90.7534	425.02	283.57	278.74	329.11	83.0956	-0.273662	0.370176
TKVG1_07240	TKV_RS03525		calcium-translocating P-type ATPase, SERCA-type	60.52	45.48	36.29	40.87	45.79	10.5123	137.48	40.74	125.73	101.317	52.7889	0.920893	0.051011
TKVG1_07235	TKV_RS03530		hypothetical protein	166.01	193.65	182.07	189.12	182.713	12.1116	254.39	186.21	255.47	232.023	39.6792	0.254033	0.401678
TKVG1_07230	TKV_RS03535	ndk	nucleoside-diphosphate kinase	344.83	341.09	250.69	311.5	312.027	43.5247	427.48	354.38	381.28	387.713	36.9722	0.245541	0.234028
TKVG1_07225	TKV_RS03540			272.45	274.52	273.91	237.86	264.685	17.9044	385.43	294.5	344.31	341.413	45.5342	0.276628	0.310614
TKVG1_07220	TKV_RS03545		lipid II flippase Amj family protein	98.71	101.5	73.33	108.12	95.415	15.243	135.65	49.29	72.52	85.82	44.6898	-0.241739	0.562969
TKVG1_07215	TKV_RS03550		ribonuclease H-like YkuK family protein	464.92	427.98	292.89	493.68	419.868	88.8203	577.52	335.47	357.06	423.35	133.951	-0.0677991	0.844613
TKVG1_07210	TKV_RS03555		phosphatase PAP2 family protein	32.14	41.88	27.53	33.84	33.8475	5.98185	65.22	43.57	62.46	57.0833	11.784	0.653605	0.0363534
TKVG1_07205	TKV_RS03560		Yip1 family protein	88.09	119.56	63.95	90.26	90.465	22.7687	111.58	94.69	51.19	85.82	31.1568	-0.133376	0.76949
TKVG1_07200	TKV_RS03565		hypothetical protein	23.06	13.4	4.05	16.9	14.3525	7.94479	24.67	11.18	8.54	14.7967	8.65185	-0.0343096	0.9688
TKVG1_07195	TKV_RS03570	bioF	8-amino-7-oxononanoate synthase	3454.52	3402.75	4440.57	3284.25	3645.52	534.802	3413.83	2829.26	2905.93	3049.67	317.69	-0.333231	0.332277
TKVG1_07190	TKV_RS13230		hypothetical protein	4024.55	3544.47	4492.44	3233.73	3823.8	551.842	3466.75	2845.3	2110.93	2807.66	678.693	-0.510468	0.143164
TKVG1_07185	TKV_RS03580		6-carboxyhexanoate--CoA ligase	3093.16	2828.33	3774.26	2675.83	3092.89	485.866	2704.27	2247.9	1770.99	2241.05	466.678	-0.529602	0.133874
TKVG1_07180	TKV_RS03585	bioD	dethiobiotin synthase	4239.84	3963.22	5447.38	3873.74	4381.05	727.769	3648.34	3377.27	2230.27	3085.29	752.774	-0.558683	0.143908
TKVG1_07175	TKV_RS03590	bioA	adenosylmethionine--8-amino-7-oxononanoate transaminase	2539.03	2488.94	3135.21	2193.19	2589.09	394.766	2016.8	1979.24	1256.21	1750.75	428.696	-0.607246	0.110067
TKVG1_07170	TKV_RS03595	bioB	biotin synthase BioB	1591.69	1590.86	2014.72	1328.97	1631.56	283.795	1304.71	1260.41	880.66	1148.59	233.092	-0.555291	0.13913
TKVG1_07165	TKV_RS13355			1356.62	1687.84	2168.8	1386.33	1649.9	376.908	1520.46	1434.04	1072.38	1342.29	237.712	-0.364278	0.378447
TKVG1_07160	TKV_RS12280			600.7	755.13	958.92	564.01	719.69	179.705	717.28	709.15	512.94	646.457	115.7	-0.230428	0.610919
TKVG1_07155	TKV_RS03600		hypothetical protein	205.14	256.72	258.87	158.47	219.8	47.8394	353.62	237.63	259.91	283.72	61.5517	0.248125	0.519872
TKVG1_07150	TKV_RS03605	pgsA	CDP-diacylglycerol--glycerol-3-phosphate 3-phosphatidyltransferase	83.26	68.54	56.77	57.94	66.6275	12.2874	170.96	76.07	128.03	125.02	47.5166	0.755836	0.0376525
TKVG1_07145	TKV_RS13360		hypothetical protein	74.52	78.34	57.73	75.99	71.645	9.40913	193.77	75.53	155.05	141.45	60.2818	0.808192	0.0420538
TKVG1_07140	TKV_RS13365		hypothetical protein	14.32	32.06	31.81	30.17	27.09	8.5545	87	18.64	50.08	51.9067	34.2166	0.607102	0.32283
TKVG1_07135	TKV_RS03625	larE	ATP-dependent sacrificial sulfur transferase LarE	12.97	9.4	13.63	13.74	12.435	2.05171	41.87	14.94	34.37	30.3933	13.8984	1.02585	0.0317278
TKVG1_07130	TKV_RS03630	larB	nickel pincer cofactor biosynthesis protein LarB	13.76	15.07	14.87	26.81	17.6275	6.14873	42.44	17.39	31.91	30.58	12.5778	0.604272	0.212151
TKVG1_07125	TKV_RS13370			34.08	33.23	23.04	35.02	31.3425	5.58307	57.8	25.82	43.53	42.3833	16.0208	0.326985	0.377909
TKVG1_07120	TKV_RS03645		HAMP domain-containing sensor histidine kinase	78.59	80.21	69.79	75.22	75.9525	4.60419	81.15	110.32	74.01	88.4933	19.2366	0.160504	0.664929
TKVG1_07115	TKV_RS03650		response regulator transcription factor	76.69	98.23	65.16	81.98	80.515	13.7401	80.71	110.83	65.46	85.6667	23.0876	0.0413816	0.931108
TKVG1_07110	TKV_RS13930			236.44	267.88	158.37	351.94	253.658	80.0789	281.93	392.2	279.09	317.74	64.4999	0.270425	0.530044
TKVG1_07105	TKV_RS03660		DUF2680 domain-containing protein	233.03	238.15	168.13	199.74	209.762	32.5625	201.33	211.53	234.1	215.653	16.7696	-0.00375151	0.991661
TKVG1_07100	TKV_RS03665		biotin transporter BioY	1476.57	1538.21	1153.78	1528.52	1424.27	182.346	1241.31	1418.58	746.27	1135.39	348.447	-0.356907	0.333033
TKVG1_07095	TKV_RS03670		bifunctional nuclease family protein	296.79	301.13	258.25	325.31	295.37	27.7458	323.24	365.61	305.43	331.427	30.914	0.106518	0.734871
TKVG1_07090	TKV_RS03675		hypothetical protein	2.49	5.23	0	0	1.93	2.49355	0	2.87	0	0.956667	1.657	-0.16166	0.79856
TKVG1_07085	TKV_RS03680		hypothetical protein	0	0	0	3.23	0.8075	1.615	1.55	7.21	0	2.92	3.79522	0.315677	0.590659
TKVG1_07080	TKV_RS03685		hypothetical protein	0	0.84	0	0	0.21	0.42	1.59	0	0	0.53	0.917987	0.0850373	0.852867
TKVG1_07075	TKV_RS03695		hypothetical protein	8.93	41.06	39.68	21.87	27.885	15.3642	18.81	15.42	5.61	13.28	6.85527	-0.830755	0.211347
TKVG1_07070	TKV_RS03705			36.81	38.94	34.04	32.31	35.525	2.93569	30.37	38.97	34.03	34.4567	4.31585	-0.0901771	0.81622
TKVG1_07065	TKV_RS03710	istA		17.25	14.68	18.25	20.05	17.5575	2.24103	16.55	14.5	13.22	14.7567	1.67977	-0.306823	0.428799
TKVG1_07060	TKV_RS13135		hypothetical protein	33.01	40.83	36.68	28.04	34.64	5.43736	28.88	26.84	41.01	32.2433	7.66037	-0.136647	0.823892
TKVG1_07055	TKV_RS03715			34.98	31.24	25.8	39.59	32.9025	5.83804	20.87	22.1	11.52	18.1633	5.78607	-0.84658	0.0317278
TKVG1_07050	TKV_RS03720		NAD(P)-dependent oxidoreductase	909.77	696.47	647.6	786.28	760.03	115.169	774.13	512.86	672.26	653.083	131.686	-0.285348	0.258817
TKVG1_07045	TKV_RS03725			718.5	565.2	599.59	669.36	638.163	68.8931	704.71	525.57	605.61	611.963	89.7388	-0.134932	0.599082
TKVG1_07040	TKV_RS03730		DUF86 domain-containing protein	52.59	58.47	66.31	27.65	51.255	16.7102	83.72	41.93	116.98	80.8767	37.6057	0.470687	0.39564
TKVG1_07035	TKV_RS03735		nucleotidyltransferase domain-containing protein	81.76	65.13	80.92	48.1	68.9775	15.8817	186.49	58.85	177	140.78	71.1119	0.782534	0.124518
TKVG1_07030	TKV_RS03740	sppA		65.87	52.17	50.5	40.16	52.175	10.5628	118.45	49.48	149.39	105.773	51.1471	0.821346	0.0825071
TKVG1_07025	TKV_RS13390		hypothetical protein	55.84	41.03	29.62	19.64	36.5325	15.5579	89.02	28.5	76.27	64.5967	31.904	0.594915	0.310359
TKVG1_07020	TKV_RS13395		hypothetical protein	40.19	26.64	18.97	18.43	26.0575	10.1403	46.1	17.2	38.27	33.8567	14.9469	0.252429	0.638244
TKVG1_07015	TKV_RS13400		hypothetical protein	27.6	22.68	21.94	23.8	24.005	2.51568	48.37	15.25	37.78	33.8	16.9149	0.34574	0.460029
TKVG1_07010	TKV_RS13405		hypothetical protein	28.32	28	23.23	27.82	26.8425	2.41719	58.82	27.57	46.79	44.3933	15.7623	0.568163	0.284517
TKVG1_07005	TKV_RS03750		ABC transporter ATP-binding protein	45.11	44.42	32.6	49.48	42.9025	7.22452	79.89	36.33	53.27	56.4967	21.9585	0.282287	0.457366
TKVG1_07000	TKV_RS03755			1.56	5.19	0	0	1.6875	2.44807	5.66	4.78	6.79	5.74333	1.00759	0.813518	0.267748
TKVG1_06995	TKV_RS03760		IS1182-like element ISTte1 family transposase	8.53	5.4	4.31	6.9	6.285	1.83504	12.49	7.37	6.14	8.66667	3.36773	0.332977	0.473138
TKVG1_06990	TKV_RS13935			0.91	6.71	2.7	0.31	2.6575	2.88612	4.22	2.45	1.22	2.63	1.50808	-0.0844821	0.926915
TKVG1_06985	TKV_RS03770			0.67	0	0	0	0.1675	0.335	6.59	0.77	0.67	2.67667	3.38941	0.662471	0.292254
TKVG1_06980	TKV_RS03775		hypothetical protein	27.66	31.93	21.7	27.42	27.1775	4.19845	69.64	30.92	67.92	56.16	21.8754	0.884528	0.0330598
TKVG1_06975	TKV_RS12290			4.2	4.04	5.05	5.77	4.765	0.803347	3.29	2.22	2.99	2.83333	0.551936	-0.584719	0.328829
TKVG1_06970	TKV_RS03785		hypothetical protein	5.11	0	0	2.64	1.9375	2.45398	0	5.89	0	1.96333	3.40059	0.0171342	0.983559
TKVG1_06965	TKV_RS03790		class IIb bacteriocin, lactobin A/cerein 7B family	0	3.4	0	0	0.85	1.7	0	0	0	0	0	-0.0983772	0.808687
TKVG1_06960	TKV_RS13140		hypothetical protein	3.88	0	0	6.01	2.4725	2.98449	0	4.47	0	1.49	2.58076	-0.118979	0.851242
TKVG1_06955	TKV_RS03795		lactococcin G-beta/enterocin 1071B family bacteriocin	74.81	62.74	61.02	67.31	66.47	6.16108	120.71	122.82	73.64	105.723	27.805	0.540557	0.178431
TKVG1_06950	TKV_RS03800		hypothetical protein	136.24	152.27	112.24	101.77	125.63	22.8827	173.1	243.49	141.75	186.113	52.1034	0.470722	0.260619
TKVG1_06945	TKV_RS03805		type II CAAX endopeptidase family protein	26.8	23.84	13.33	15.47	19.86	6.47861	19.7	49.44	23.38	30.84	16.2128	0.525437	0.345837
TKVG1_06940	TKV_RS12295		cysteine peptidase family C39 domain-containing protein	22.71	38.69	20.88	25.85	27.0325	8.03809	54.34	73.05	22.05	49.8133	25.7996	0.649159	0.270952
TKVG1_06935	TKV_RS03810		Blp family class II bacteriocin	44.33	45.49	49.25	37.01	44.02	5.12348	38.71	46.19	28.66	37.8533	8.79634	-0.261781	0.577306
TKVG1_06930	TKV_RS13180		hypothetical protein	178.55	168.41	129.47	113.5	147.483	30.9968	160.42	194.45	81.38	145.417	58.0089	-0.0691983	0.898861
TKVG1_06925	TKV_RS03825		hypothetical protein	79.88	90.47	70.62	71.93	78.225	9.1313	83.13	117.42	46.16	82.2367	35.6384	0.0149194	0.982972
TKVG1_06920	TKV_RS03830		lactococcin G-beta/enterocin 1071B family bacteriocin	494.17	634.47	671.5	433.48	558.405	113.003	522.93	887.92	323.57	578.14	286.197	-0.00926942	0.990213
TKVG1_06915	TKV_RS03835		lactococcin G-alpha/enterocin 1071A family bacteriocin	482.61	566.61	661.62	365.25	519.023	125.924	445.88	689.03	361.89	498.933	169.9	-0.109059	0.841753
TKVG1_06910	TKV_RS03840		CPBP family intramembrane glutamic endopeptidase	24.43	26.96	29.86	29.6	27.7125	2.55052	23	33.05	18.43	24.8267	7.47921	-0.201031	0.690731
TKVG1_06905	TKV_RS03845		peptidase domain-containing ABC transporter	22.67	25.69	23.73	16.83	22.23	3.81118	27.15	41.2	26.88	31.7433	8.19083	0.419892	0.326978
TKVG1_06900	TKV_RS03850		HlyD family efflux transporter periplasmic adaptor subunit	33.21	34.57	23.12	24.6	28.875	5.84867	34.38	46.71	42.27	41.12	6.24493	0.441347	0.228325
TKVG1_06895	TKV_RS03855		valine--tRNA ligase	323.28	288.8	285.79	280.93	294.7	19.3272	250.97	212.08	180.44	214.497	35.327	-0.522007	0.0232277
TKVG1_06890	TKV_RS03860		GNAT family N-acetyltransferase	130.72	101.78	146.77	124.77	126.01	18.635	113.73	96.83	87.29	99.2833	13.3896	-0.408677	0.24883
TKVG1_06885	TKV_RS03865		folylpolyglutamate synthase/dihydrofolate synthase family protein	209.32	192.74	193.32	194.48	197.465	7.93637	181.65	153.82	111.51	148.993	35.3182	-0.469594	0.0953945
TKVG1_06880	TKV_RS03870		hypothetical protein	158.09	160.29	181.2	112.35	152.982	29.0213	130.19	118.28	72.61	107.027	30.3948	-0.548419	0.193402
TKVG1_06875	TKV_RS03875	cooS	monofunctional anaerobic carbon-monoxide dehydrogenase catalytic subunit CooS	4247.86	4537.72	12965.3	3693.98	6361.22	4416.63	2479.16	4503.05	4544.6	3842.27	1180.67	-0.633749	0.316252
TKVG1_06870	TKV_RS03880	cooF1	monofunctional anaerobic carbon-monoxide dehydrogenase accessory protein CooF1	2630.81	2966.46	8763.07	2352.11	4178.11	3066.94	1573.59	2896.12	3292.22	2587.31	899.969	-0.595858	0.358652
TKVG1_06860	TKV_RS03890			15.41	10.26	6.28	5.3	9.3125	4.59614	23.68	5.32	26.35	18.45	11.449	0.689988	0.282545
TKVG1_06855	TKV_RS12745		hypothetical protein	18.09	0	0	1.96	5.0125	8.76716	19.82	2.19	28.72	16.91	13.5023	0.590105	0.397747
TKVG1_06850	TKV_RS03900		type II toxin-antitoxin system Phd/YefM family antitoxin	310.43	283.19	215.78	315.26	281.165	45.8192	215.55	159.07	122.41	165.677	46.9202	-0.80037	0.0064882
TKVG1_06845	TKV_RS03905			468.33	435.95	339.31	469.66	428.312	61.3482	387.52	270.62	194.94	284.36	97.0224	-0.642196	0.0380942
TKVG1_06840	TKV_RS03910		amidase domain-containing protein	326.36	289.83	358.26	299.68	318.533	30.6529	278.97	208.57	184.87	224.137	48.9433	-0.577065	0.0576297
TKVG1_06835	TKV_RS03915		hypothetical protein	405.06	427.13	510.23	370.08	428.125	59.5635	398.55	336.93	284.57	340.017	57.0527	-0.40388	0.233038
TKVG1_06830	TKV_RS03920		helix-turn-helix domain-containing protein	99.51	135.35	108.23	81.49	106.145	22.4289	113.74	108	111.91	111.217	2.93214	0.00115992	0.998021
TKVG1_06825	TKV_RS03925		hypothetical protein	69.86	77.79	64.25	36.23	62.0325	18.0763	104.86	92.28	84.95	94.03	10.0697	0.481878	0.231375
TKVG1_06820	TKV_RS03930		hypothetical protein	50.42	67.38	49.77	58.65	56.555	8.27132	86.95	95.76	106.29	96.3333	9.68274	0.672268	0.0437431
TKVG1_06815	TKV_RS03935		hypothetical protein	78.17	90.55	63.07	55.47	71.815	15.6527	125.87	121	97.15	114.673	15.3698	0.580589	0.0709822
TKVG1_06810	TKV_RS03940		hypothetical protein	59.81	64.6	65.1	47.75	59.315	8.07035	91.79	90.12	73.75	85.22	9.96834	0.421412	0.212936
TKVG1_06805	TKV_RS03945			64.19	74.85	49.15	63.43	62.905	10.5485	95.18	77.03	84.09	85.4333	9.14926	0.357262	0.284564
TKVG1_06800	TKV_RS03950		YncE family protein	34.59	31.52	45.84	22.42	33.5925	9.66292	47.81	40.56	44.84	44.4033	3.64467	0.275743	0.546771
TKVG1_06795	TKV_RS03955		DUF4364 family protein	88.91	91.09	132.98	73.07	96.5125	25.6036	89.54	69.56	73.81	77.6367	10.5253	-0.38296	0.372792
TKVG1_06790	TKV_RS03960		alpha/beta-type small acid-soluble spore protein	27.19	58.18	16.72	22.03	31.03	18.5979	34.65	63.74	49.8	49.3967	14.5492	0.534785	0.359207
TKVG1_06785	TKV_RS03965		4Fe-4S double cluster binding domain-containing protein	48.34	50.6	52.33	41.94	48.3025	4.5454	51.01	39.66	36.1	42.2567	7.78679	-0.264749	0.433467
TKVG1_06780	TKV_RS03970		LacI family DNA-binding transcriptional regulator	114.52	107.82	159.59	93.61	118.885	28.5027	97.11	74	58.1	76.4033	19.6157	-0.684026	0.0956515
TKVG1_06775	TKV_RS03975		glycosyl hydrolase family 65 protein, GH65 family	14.51	18.55	25.44	17.94	19.11	4.57935	7.07	10.81	6.17	8.01667	2.4606	-1.15814	0.0139322
TKVG1_06770	TKV_RS03980		ABC transporter substrate-binding protein	11.53	23.76	47.79	11.42	23.625	17.1194	9.15	30.28	20.88	20.1033	10.5864	-0.220722	0.769758
TKVG1_06765	TKV_RS03985		sugar ABC transporter permease	5.2	6.14	16.96	6.87	8.7925	5.48774	5.31	7.11	8.82	7.08	1.75519	-0.309555	0.652569
TKVG1_06760	TKV_RS03990		carbohydrate ABC transporter permease	6.65	8.13	11.39	3.52	7.4225	3.26945	3.92	7.87	11.94	7.91	4.01015	0.001829	0.998021
TKVG1_06755	TKV_RS03995	pgmB	beta-phosphoglucomutase	6.97	13.94	21.73	6.03	12.1675	7.2862	11.36	17.08	3.62	10.6867	6.75522	-0.214784	0.776825
TKVG1_06750	TKV_RS04000	thiS	sulfur carrier protein ThiS	102.4	155.49	239.38	148.66	161.482	57.0353	118.81	155.51	69.43	114.583	43.1954	-0.496456	0.36733
TKVG1_06745	TKV_RS04005		thiazole synthase	123.18	166.1	274.38	141.78	176.36	67.6685	92.1	184.62	73.34	116.687	59.5751	-0.546647	0.347182
TKVG1_06740	TKV_RS04010	thiH	2-iminoacetate synthase ThiH	92.25	135.35	218.69	92.05	134.585	59.6538	86.01	137.14	70.41	97.8533	34.9059	-0.454537	0.422147
TKVG1_06735	TKV_RS04015	thiF	sulfur carrier protein ThiS adenylyltransferase ThiF	76.15	123.83	210.49	95.49	126.49	59.3245	89.65	144.17	87.36	107.06	32.1586	-0.275262	0.652184
TKVG1_06730	TKV_RS04020	thiE	thiamine phosphate synthase	115.68	161.14	195.37	123.16	148.838	36.8573	91.7	128.45	87.98	102.71	22.369	-0.543441	0.233038
TKVG1_06725	TKV_RS13000		hypothetical protein	162.48	184.34	331.38	150.22	207.105	84.0433	137.51	182.57	85.7	135.26	48.4742	-0.597768	0.284935
TKVG1_06720	TKV_RS04025		LacI family DNA-binding transcriptional regulator	111.03	132.26	199.02	122.52	141.208	39.5063	84.72	126.05	87.69	99.4867	23.0524	-0.513474	0.285181
TKVG1_06715	TKV_RS04030		sugar ABC transporter permease	15.09	23.7	35.96	13.5	22.0625	10.2916	25.78	19.06	38.59	27.81	9.92199	0.190945	0.767326
TKVG1_06710	TKV_RS13940			20.31	15.55	23.21	11.07	17.535	5.34299	21	19.05	28.89	22.98	5.21025	0.277619	0.610716
TKVG1_06705	TKV_RS04040			17.36	20.24	28.33	7.55	18.37	8.57887	37.37	11.87	35.19	28.1433	14.1352	0.373482	0.557513
TKVG1_06700	TKV_RS04045		glycoside hydrolase family 65 protein	10.94	9.67	24.24	4.94	12.4475	8.27471	13.8	6.73	16.69	12.4067	5.1241	-0.11553	0.877608
TKVG1_06695	TKV_RS04050		S8 family serine peptidase	2.02	5.13	7.11	2.08	4.085	2.48508	2.34	1.94	2.96	2.41333	0.513939	-0.61493	0.354118
TKVG1_06690	TKV_RS04055		sigma-54-dependent transcriptional regulator	0.44	1.4	0.49	0	0.5825	0.587785	0.88	3.83	2.01	2.24	1.48839	0.998192	0.163903
TKVG1_06685	TKV_RS04065			193.6	197.94	149.78	177.04	179.59	21.8185	202.43	150.88	134.55	162.62	35.4301	-0.211975	0.375941
TKVG1_06680	TKV_RS04070		IS200/IS605 family accessory protein TnpB-related protein	406.62	461.53	489.67	468.86	456.67	35.4317	393.05	432	353.71	392.92	39.1452	-0.273692	0.396112
TKVG1_06675	TKV_RS04075		cell wall hydrolase, CBM50 family	101.16	138.01	136.32	130	126.373	17.1582	103.13	136.34	100.54	113.337	19.9635	-0.204018	0.622748
TKVG1_06670	TKV_RS12305		Mur ligase family protein	26.93	32.33	20.69	22.81	25.69	5.12905	43.51	33.7	40.97	39.3933	5.09151	0.523555	0.0956515
TKVG1_06665	TKV_RS04085		single-stranded DNA-binding protein	67.65	53.16	46.95	45.44	53.3	10.1332	144.6	46.08	127.72	106.133	52.6881	0.789253	0.0885286
TKVG1_06660	TKV_RS04090		cob(I)yrinic acid a,c-diamide adenosyltransferase	337.9	336.35	350.95	271.71	324.228	35.6187	455.84	305.93	322.37	361.38	82.2167	0.0575171	0.868818
TKVG1_06655	TKV_RS04095	dapD	2,3,4,5-tetrahydropyridine-2,6-dicarboxylate N-acetyltransferase	1355.46	1296.94	1326.96	1321.43	1325.2	24.025	1273.86	1027	688.27	996.377	293.994	-0.477953	0.126235
TKVG1_06650	TKV_RS04100	dapB	4-hydroxy-tetrahydrodipicolinate reductase	1356.43	1506.26	1414.78	1387.19	1416.16	64.619	1313.94	1073.64	744.99	1044.19	285.616	-0.504297	0.0948366
TKVG1_06645	TKV_RS04105	dapA	4-hydroxy-tetrahydrodipicolinate synthase	1181.42	1296.87	1221.73	1202.47	1225.62	50.2701	1054.43	876.96	617.05	849.48	219.981	-0.58909	0.0437108
TKVG1_06640	TKV_RS04110		aspartate-semialdehyde dehydrogenase	998.3	1007.65	995.37	1088.9	1022.55	44.5389	869.93	690.43	499.51	686.623	185.239	-0.635706	0.0271329
TKVG1_06635	TKV_RS04115		hypothetical protein	38.31	37.3	19.42	43.16	34.5475	10.4043	117.08	46.76	48.47	70.77	40.1147	0.8216	0.0692506
TKVG1_06630	TKV_RS04120			27.99	41.43	39.98	50.07	39.8675	9.08515	99.09	48.68	67.21	71.66	25.4979	0.652011	0.142659
TKVG1_06625	TKV_RS04125		hypothetical protein	13.43	38	6.89	6.39	16.1775	14.8977	14.34	19.03	5.19	12.8533	7.03875	-0.229886	0.76949
TKVG1_06620	TKV_RS04130	glnA	type I glutamate--ammonia ligase	294.34	240.25	176.63	238.45	237.417	48.1123	386.85	171	219.12	258.99	113.314	0.0267531	0.952563
TKVG1_06615	TKV_RS04135		response regulator	133.63	112.85	104.28	150.48	125.31	20.8188	298.93	108.08	178.7	195.237	96.4937	0.480302	0.239137
TKVG1_06610	TKV_RS04140	iadA	beta-aspartyl-peptidase	55.11	63.79	47.06	56.97	55.7325	6.88124	135.66	44.5	84.82	88.3267	45.6811	0.50195	0.231375
TKVG1_06605	TKV_RS04145		PLP-dependent aminotransferase family protein	43.18	48.79	30.18	35.23	39.345	8.26329	47.73	50.78	37.31	45.2733	7.06305	0.14444	0.678806
TKVG1_06600	TKV_RS04150		polymer-forming cytoskeletal protein	273.03	273.96	152.91	233.43	233.332	56.8456	224.35	374.57	151.99	250.303	113.537	0.0723107	0.897932
TKVG1_06595	TKV_RS04155		M23 family metallopeptidase	189.26	192.51	131.63	204.15	179.387	32.4737	167.93	278.7	132.21	192.947	76.382	0.0699082	0.894681
TKVG1_06590	TKV_RS04160		hypothetical protein	30.66	21.93	17.04	32.94	25.6425	7.44344	26.17	11.77	43.69	27.21	15.9854	0.0192178	0.981745
TKVG1_06585	TKV_RS04165		YkuS family protein	23.7	20.66	13.49	23.25	20.275	4.71755	39.53	33.95	29.64	34.3733	4.95857	0.607211	0.190508
TKVG1_06580	TKV_RS04170		hypothetical protein	110.66	92.31	45.22	41.24	72.3575	34.496	89.88	129.09	73.96	97.6433	28.3731	0.347248	0.522719
TKVG1_06575	TKV_RS04175		HDIG domain-containing metalloprotein	81.83	121.96	47.5	64.25	78.885	31.9548	106.55	159.65	100.72	122.307	32.4714	0.54536	0.24139
TKVG1_06570	TKV_RS04180		amidase domain-containing protein	10.11	8.51	7.59	10.43	9.16	1.34199	18.55	12.23	22.63	17.8033	5.24005	0.81199	0.0488352
TKVG1_06565	TKV_RS04185		ABC transporter ATP-binding protein	227.02	218.53	152.88	179.94	194.593	34.5407	314.32	145.23	181.53	213.693	89.0153	0.0362304	0.931108
TKVG1_06560	TKV_RS04190		hypothetical protein	123.87	124.02	85.58	97.85	107.83	19.2705	164.73	87.77	100.53	117.677	41.2458	0.0352608	0.925852
TKVG1_06555	TKV_RS04195	sppA	signal peptide peptidase SppA	170.47	159.96	119.56	137.42	146.852	22.8287	228.49	114.76	106.3	149.85	68.2355	-0.0689655	0.864426
TKVG1_06550	TKV_RS13430		nucleotidyltransferase domain-containing protein	219.16	218.71	147.96	237.5	205.833	39.5622	279.14	172.53	136.71	196.127	74.089	-0.145734	0.710733
TKVG1_06545	TKV_RS04205			247.98	222.06	174.96	186.77	207.942	33.3588	282.91	151.11	176.83	203.617	69.8638	-0.110501	0.757019
TKVG1_06540	TKV_RS04210		hypothetical protein	148.68	131.83	102.27	114.75	124.382	20.2285	202.03	83.87	129.19	138.363	59.6117	0.0559676	0.901753
TKVG1_06535	TKV_RS04215		DUF1646 domain-containing protein	112.47	105.21	83.69	93.54	98.7275	12.7006	155.95	101.99	86.91	114.95	36.2988	0.127136	0.678806
TKVG1_06530	TKV_RS04220			118.06	103.24	85.64	98.64	101.395	13.3783	187.31	102.72	90.48	126.837	52.7278	0.210765	0.550636
TKVG1_06525	TKV_RS04225		Fe-Mn family superoxide dismutase	5.85	5.13	2.17	7.05	5.05	2.07692	17.9	2.25	26.01	15.3867	12.0777	1.02122	0.133211
TKVG1_06520	TKV_RS04230		TIGR01440 family protein	185.79	149.51	133.55	188.12	164.243	27.0401	236.73	216.39	427.83	293.65	116.647	0.721364	0.0845703
TKVG1_06515	TKV_RS04235		YcdB/YcdC domain-containing protein	1225.14	1113.76	616.36	2974.53	1482.45	1029.33	1705.62	3946.26	3336.85	2996.24	1158.5	0.798256	0.18411
TKVG1_06510	TKV_RS04240			12.61	13.92	11.56	10.89	12.245	1.32213	45.78	14.7	92.26	50.9133	39.034	1.5489	0.0064882
TKVG1_06505	TKV_RS04245		DUF5668 domain-containing protein	227.18	230.39	124.65	233.84	204.015	52.9798	310.26	206.82	347.95	288.343	73.0731	0.417033	0.263803
TKVG1_06500	TKV_RS04250		PspC domain-containing protein	299.26	281.77	161.84	286.14	257.252	64.0411	418.71	223.65	457.57	366.643	125.351	0.415745	0.30046
TKVG1_06495	TKV_RS04255		polysaccharide deacetylase family protein	253.47	231.64	128.54	234.85	212.125	56.5483	406.68	268.56	603.55	426.263	168.351	0.873338	0.0380942
TKVG1_06490	TKV_RS04260		amino acid permease	9.21	17.66	9.87	10.51	11.8125	3.9343	31.58	25.21	27.36	28.05	3.24057	1.08538	0.00334477
TKVG1_06485	TKV_RS04265		hypothetical protein	214.35	181.45	136.91	201.18	183.472	33.8582	306.77	136.67	254.98	232.807	87.1909	0.241961	0.523878
TKVG1_06480	TKV_RS04270		CC/Se motif family (seleno)protein	280.38	575.93	176.7	369.94	350.738	169.627	388.95	1161.03	707.49	752.49	388.002	0.911951	0.107274
TKVG1_06475	TKV_RS04275		carbon starvation protein A	211.46	617.1	140.02	391.27	339.962	212.86	341.73	1341.61	707.17	796.837	505.935	0.952389	0.126235
TKVG1_06470	TKV_RS04280		LytTR family DNA-binding domain-containing protein	31.67	46.45	33.72	38.93	37.6925	6.5898	52.83	54.38	41.96	49.7233	6.76776	0.313079	0.372792
TKVG1_06465	TKV_RS04285		sensor histidine kinase	42.27	41.62	44.27	46.36	43.63	2.14104	50.04	51.38	51.02	50.8133	0.693494	0.145327	0.652569
TKVG1_06460	TKV_RS04290		sigma-70 family RNA polymerase sigma factor	113.53	88.24	34	287.93	130.925	109.802	115.3	188.99	218.19	174.16	53.0239	0.305444	0.659996
TKVG1_06455	TKV_RS04295		DUF4349 domain-containing protein	160.15	114.04	50.18	334.3	164.668	121.746	154.19	262.22	310.01	242.14	79.8271	0.429754	0.501428
TKVG1_06450	TKV_RS04300	polA	DNA polymerase I	130.29	122.58	106.16	129.58	122.153	11.215	110.81	92.1	85.46	96.1233	13.1452	-0.409922	0.0345165
TKVG1_06445	TKV_RS04305	coaE	dephospho-CoA kinase	136.61	131.04	121.44	159.28	137.093	16.064	130.11	86.82	108.94	108.623	21.6467	-0.400071	0.140448
TKVG1_06440	TKV_RS04310		lytic transglycosylase domain-containing protein, GH23 family	201.46	165.38	171.93	176.47	178.81	15.7713	170.12	143.22	130.55	147.963	20.2069	-0.337223	0.188436
TKVG1_06435	TKV_RS04315			670.72	665.02	517.25	652.91	626.475	73.1944	520.54	510.92	320.98	450.813	112.542	-0.513974	0.0857955
TKVG1_06430	TKV_RS04320		IS200/IS605 family accessory protein TnpB-related protein	891.89	877.99	735.52	1122.97	907.092	160.331	846.39	708.65	541.37	698.803	152.748	-0.431421	0.137448
TKVG1_06425	TKV_RS04325		nicotinate phosphoribosyltransferase	545.42	465.35	461.9	577.39	512.515	57.9595	405.66	381.01	276.4	354.357	68.6283	-0.579426	0.038705
TKVG1_06420	TKV_RS04330		peptide ABC transporter substrate-binding protein	368.06	398.88	409.8	440.43	404.293	29.8794	333.33	305.4	209.92	282.883	64.7129	-0.569146	0.069683
TKVG1_06410	TKV_RS04340		C40 family peptidase	710.87	840.7	811.28	728.36	772.803	62.9851	1053.64	570.19	1135.06	919.63	305.35	0.148148	0.723068
TKVG1_06405	TKV_RS04345	typA	translational GTPase TypA	193.07	135.13	88.19	141.66	139.512	42.9194	433.06	83.13	341.06	285.75	181.403	0.771232	0.160189
TKVG1_06400	TKV_RS04350		lytic transglycosylase domain-containing protein, GH23 family	128.25	131.54	86.54	139.25	121.395	23.6895	216.7	195.24	244.13	218.69	24.5057	0.766403	0.0064882
TKVG1_06395	TKV_RS04355		hypothetical protein	88.4	77.84	65.49	81.44	78.2925	9.59474	176.78	74.84	141.73	131.117	51.7921	0.606308	0.0938833
TKVG1_06390	TKV_RS04360		DUF4321 domain-containing protein	238.06	261.92	239.18	211.16	237.58	20.7625	336.89	175.15	272.96	261.667	81.4593	0.0430767	0.917496
TKVG1_06385	TKV_RS04365		Maf family protein	304.43	287.59	208.76	290.28	272.765	43.3046	374.99	191.62	314.58	293.73	93.4461	0.0255215	0.948856
TKVG1_06380	TKV_RS04370	radC	DNA repair protein RadC	470.07	428.94	361.22	474.72	433.738	52.5402	625.02	299.76	422.66	449.147	164.24	-0.0436462	0.907978
TKVG1_06375	TKV_RS04375		rod shape-determining protein	459.63	463.49	444.1	490.14	464.34	19.1329	496.13	324.78	335.47	385.46	95.992	-0.351289	0.14197
TKVG1_06370	TKV_RS04380	mreC	rod shape-determining protein MreC	506.68	446.21	437.99	436.21	456.773	33.5555	536.35	347.99	354.48	412.94	106.925	-0.230604	0.359207
TKVG1_06365	TKV_RS04385	mreD	rod shape-determining protein MreD	258.63	214.57	224.3	229.29	231.697	18.9669	320.57	209.26	202.73	244.187	66.2304	-0.0179805	0.958927
TKVG1_06360	TKV_RS04390		penicillin-binding protein 2	384.48	358.94	306.5	310.62	340.135	37.9586	468.88	275.58	274.89	339.783	111.802	-0.0933815	0.757524
TKVG1_06355	TKV_RS04395	minC	septum site-determining protein MinC	148.11	108.92	86.41	132.14	118.895	26.9798	151.51	136.16	108.96	132.21	21.5483	0.0873987	0.802472
TKVG1_06350	TKV_RS04400	minD	septum site-determining protein MinD	346.06	332.77	244.48	369.61	323.23	54.6653	375.03	392.65	247.45	338.377	79.2361	0.0100031	0.983436
TKVG1_06345	TKV_RS04405	minE	cell division topological specificity factor MinE	397.87	332.82	222.82	303.72	314.308	72.5889	340.55	317.85	255.81	304.737	43.8656	-0.0922603	0.78115
TKVG1_06340	TKV_RS04410	rodA	rod shape-determining protein RodA	140.47	121.58	88.73	121.49	118.068	21.4989	182.51	108.92	131.94	141.123	37.6447	0.174914	0.523455
TKVG1_06335	TKV_RS04415	mgsA	methylglyoxal synthase	195.65	130.84	112.76	115.21	138.615	38.8575	260.9	113.93	155.29	176.707	75.7895	0.23595	0.569882
TKVG1_06330	TKV_RS04420		M23 family metallopeptidase	83.11	56.95	48.55	63.29	62.975	14.7185	108.38	59.04	90.23	85.8833	24.9555	0.348169	0.321099
TKVG1_06325	TKV_RS04425		M50 family metallopeptidase	47.35	28.29	23.28	26.53	31.3625	10.8585	73.29	29.62	45.74	49.55	22.0829	0.510511	0.244795
TKVG1_06320	TKV_RS04430		TIGR03960 family B12-binding radical SAM protein	101.26	98.6	61.19	84.03	86.27	18.3553	121.88	76.36	89.83	96.0233	23.3834	0.0811031	0.786398
TKVG1_06315	TKV_RS04435		TIGR03936 family radical SAM-associated protein	65.03	55.25	31.92	50.53	50.6825	13.8897	69.32	45.91	40.99	52.0733	15.1373	-0.0259069	0.954677
TKVG1_06310	TKV_RS04440		Rne/Rng family ribonuclease	131.93	116.05	69.41	121.21	109.65	27.63	179.72	123.17	117.67	140.187	34.3471	0.274343	0.373525
TKVG1_06305	TKV_RS04445	queF	preQ(1) synthase	1276.35	1158.89	698.47	1293.73	1106.86	278.769	1069.93	699.73	428.14	732.6	322.155	-0.619151	0.121908
TKVG1_06300	TKV_RS04450		QueT transporter family protein	801.48	814.93	483.5	953.29	763.3	198.752	776.61	536.2	336.63	549.813	220.306	-0.507821	0.198909
TKVG1_06295	TKV_RS04455		lipopolysaccharide assembly protein LapA domain-containing protein	190.64	216.58	163.59	203.56	193.593	22.6322	125.6	192.28	105.99	141.29	45.2341	-0.453306	0.256418
TKVG1_06290	TKV_RS04460	rplU	50S ribosomal protein L21	2008.92	1637.4	921.18	2157.04	1681.13	551.777	1763.74	932.93	1291.81	1329.49	416.685	-0.375941	0.348897
TKVG1_06285	TKV_RS04465		ribosomal-processing cysteine protease Prp	897.05	712.19	411.51	841.97	715.68	217.084	997.04	427.5	633.88	686.14	288.344	-0.131123	0.773128
TKVG1_06280	TKV_RS04470	rpmA	50S ribosomal protein L27	650.83	531.05	299.51	612.37	523.44	157.416	857.76	266.16	575.24	566.387	295.899	0.0197518	0.978163
TKVG1_06275	TKV_RS04475		Spo0B domain-containing protein	656.41	462.88	230.22	528.25	469.44	178.592	995.76	223.65	735.84	651.75	392.864	0.318038	0.584854
TKVG1_06270	TKV_RS04480	obgE	GTPase ObgE	200.26	144.55	92.62	154.24	147.918	44.1545	380.93	77.27	280.18	246.127	154.668	0.528284	0.341545
TKVG1_06265	TKV_RS04485	nadD	nicotinate-nucleotide adenylyltransferase	283.95	255.64	196.44	265.26	250.322	37.7957	447.67	173.8	286.97	302.813	137.621	0.160964	0.690144
TKVG1_06260	TKV_RS04490	yqeK	bis(5'-nucleosyl)-tetraphosphatase (symmetrical)YqeK	283.32	248.09	181.48	247.04	239.982	42.4901	446.22	153.11	317.5	305.61	146.916	0.228091	0.603637
TKVG1_06255	TKV_RS04495		LCP family protein	345.45	318.15	273.26	299.94	309.2	30.3952	529.4	219	357.65	368.683	155.494	0.139966	0.715939
TKVG1_06250	TKV_RS04500	rsfS	ribosome silencing factor	448.44	473.56	383.56	496.08	450.41	48.6295	664.4	304.67	402.61	457.227	185.98	-0.0772881	0.836999
TKVG1_06245	TKV_RS04505		PAS domain-containing protein	590.39	571	426.59	553.82	535.45	74.0949	699.51	343.97	619.89	554.457	186.583	-0.0293038	0.941865
TKVG1_06240	TKV_RS04510		NAD/NADP octopine/nopaline dehydrogenase family protein	4072.26	4755.86	3066.35	4807.46	4175.48	811.801	4364.87	3519.87	3452.05	3778.93	508.571	-0.200903	0.417673
TKVG1_06235	TKV_RS04515		cobalamin-dependent protein	5356.03	6269.45	4604.63	6141.58	5592.92	772.777	5756.12	5038.37	4427.88	5074.12	664.841	-0.201622	0.377909
TKVG1_06230	TKV_RS04520	asnB	asparagine synthase B	723.87	843.04	735.22	648.29	737.605	80.1832	737.95	1046.13	771.83	851.97	168.999	0.150306	0.702596
TKVG1_06225	TKV_RS04525		D-alanyl-D-alanine carboxypeptidase family protein	295.66	295.28	245.25	259.06	273.812	25.636	489.96	374.78	491.28	452.007	66.8835	0.638537	0.00334477
TKVG1_06220	TKV_RS04530		helix-hairpin-helix domain-containing protein	39.65	37.9	40.06	62.47	45.02	11.671	140.81	75.56	197.96	138.11	61.2447	1.34819	0.00327013
TKVG1_06215	TKV_RS04535		hypothetical protein	84.69	86.75	60.54	75.67	76.9125	11.9285	102.67	110.58	168.18	127.143	35.7582	0.621845	0.121671
TKVG1_06210	TKV_RS04540		phosphatidylglycerophosphatase A	79.16	95.24	84.87	103.34	90.6525	10.7631	120.47	113.6	193.75	142.607	44.4244	0.548969	0.173541
TKVG1_06205	TKV_RS13440		hypothetical protein	46.9	42.38	32.92	56.86	44.765	9.94719	114.2	97.61	192	134.603	50.3943	1.33492	0.00334477
TKVG1_06200	TKV_RS13800		hypothetical protein	33.44	28.35	33.57	36.72	33.02	3.46303	72.73	63.37	106.33	80.81	22.591	1.03802	0.0338528
TKVG1_06195	TKV_RS04550		radical SAM protein	53.95	71.79	35.01	46.19	51.735	15.4659	102.08	110.74	113.85	108.89	6.09919	0.972523	0.00340338
TKVG1_06190	TKV_RS04555		NUDIX hydrolase	35.65	48.53	44.89	20.66	37.4325	12.4266	74.04	103.61	73.41	83.6867	17.257	0.953096	0.045134
TKVG1_06185	TKV_RS04560		4'-phosphopantetheinyl transferase superfamily protein	20.41	34.55	27.93	28.36	27.8125	5.78805	61.97	73.48	61.36	65.6033	6.82821	1.07706	0.00390803
TKVG1_06180	TKV_RS04565		class I adenylate-forming enzyme family protein	11.48	21.99	17.84	13.05	16.09	4.77375	33.56	37.2	35.52	35.4267	1.82179	0.966476	0.0191104
TKVG1_06175	TKV_RS04570		hypothetical protein	9.6	7.71	3.14	0	5.1125	4.35557	17.35	27.31	28.39	24.35	6.08618	1.40199	0.0363534
TKVG1_06170	TKV_RS04575		Gfo/Idh/MocA family oxidoreductase	8.64	19.61	11.9	4.28	11.1075	6.47106	16.1	30.84	21.72	22.8867	7.43893	0.79465	0.186657
TKVG1_06165	TKV_RS04580		hypothetical protein	2	11.94	6.43	3.68	6.0125	4.35317	17.88	25.13	22.62	21.8767	3.68172	1.36993	0.021355
TKVG1_06160	TKV_RS04585		phenylacetate--CoA ligase family protein	6.69	11.68	8.32	5.85	8.135	2.57621	17.65	20.38	19.05	19.0267	1.36515	1.04798	0.0142829
TKVG1_06155	TKV_RS04590		non-ribosomal peptide synthetase	3.11	5.66	5.31	3.83	4.4775	1.2084	9.52	12.08	10.64	10.7467	1.28333	1.0631	0.0145189
TKVG1_06150	TKV_RS04595		ATP-grasp domain-containing protein	11.33	10.91	11	5.66	9.725	2.71601	13.48	37.92	18.95	23.45	12.8264	0.99643	0.0772516
TKVG1_06145	TKV_RS04600		MFS transporter	1.84	5.93	5.5	0.47	3.435	2.69719	4.79	13.38	9.72	9.29667	4.31062	0.866878	0.214198
TKVG1_06140	TKV_RS04605		TatD family hydrolase	3.81	7.4	5.29	0	4.125	3.11971	6.23	6.14	7.66	6.67667	0.85278	0.365351	0.635409
TKVG1_06135	TKV_RS13450		hypothetical protein	1.65	2.59	0	0	1.06	1.28273	29.37	1.9	33.93	21.7333	17.3268	1.6132	0.0198522
TKVG1_06130	TKV_RS13455		hypothetical protein	2.91	3.57	3.24	7.01	4.1825	1.90416	7.7	1.12	15.14	7.98667	7.01439	0.493052	0.507083
TKVG1_06125	TKV_RS04615	gltX	glutamate--tRNA ligase	108.83	72.93	54.39	82.83	79.745	22.692	136.36	58.24	107.42	100.673	39.4946	0.23446	0.57856
TKVG1_06110	TKV_RS04630	fdx1	[4Fe4S] ferredoxin	200.88	168.93	102.31	310.81	195.733	87.0162	192.51	109.9	45.46	115.957	73.7119	-0.692221	0.223011
TKVG1_06105	TKV_RS04635	ilvE	branched-chain-amino-acid transaminase	764.57	647.63	720.38	660.95	698.382	54.2884	520.3	357.76	255.21	377.757	133.672	-0.932679	0.00340338
TKVG1_06100	TKV_RS13460		hypothetical protein	563.35	383.8	401.22	417.29	441.415	82.4324	428.13	251.6	183.1	287.61	126.422	-0.664047	0.0835225
TKVG1_06095	TKV_RS13465		hypothetical protein	142.83	109.46	142.29	147.32	135.475	17.4893	165.31	64.83	58.73	96.29	59.8508	-0.548308	0.24883
TKVG1_06090	TKV_RS04645		hypothetical protein	93.16	73.1	122.47	73.76	90.6225	23.1811	112.51	37.02	30.35	59.96	45.6317	-0.6154	0.280534
TKVG1_06085	TKV_RS04650		aspartyl-phosphate phosphatase Spo0E family protein	173.38	129.61	166.97	164.53	158.623	19.6985	191.74	75.44	57.35	108.177	72.931	-0.597827	0.227876
TKVG1_06080	TKV_RS04655		cobaltochelatase subunit CobN	377.71	318.5	317.48	246.74	315.108	53.5734	416.53	431.6	299.05	382.393	72.5697	0.199313	0.573712
TKVG1_06075	TKV_RS04660		energy-coupling factor ABC transporter permease	363.9	289.96	341.5	208.99	301.087	68.7613	307.66	412.18	223.96	314.6	94.3017	0.000363081	0.999053
TKVG1_06070	TKV_RS04665		PDGLE domain-containing protein	463.99	456.58	572.39	346.09	459.762	92.4381	469.35	706.57	394.5	523.473	162.923	0.107611	0.836798
TKVG1_06065	TKV_RS04675		HD domain-containing phosphohydrolase	189.77	190.94	295.28	109.49	196.37	76.1673	175.47	368.64	242.03	262.047	98.1283	0.29162	0.622748
TKVG1_06060	TKV_RS04680		GGDEF domain-containing protein	200.4	180.59	266.9	117.68	191.392	61.462	128.94	329.61	212.3	223.617	100.813	0.148751	0.81251
TKVG1_06055	TKV_RS04685		calcium-translocating P-type ATPase, SERCA-type	14.05	8.55	5.82	7.47	8.9725	3.56629	32.82	8.35	25.11	22.0933	12.5108	1.01359	0.0528526
TKVG1_06050	TKV_RS04690		ECF transporter S component	97.68	95.34	75.59	81.56	87.5425	10.6806	120.46	46.87	96.48	87.9367	37.5315	-0.0790945	0.863116
TKVG1_06045	TKV_RS04695		HAD family hydrolase	248.11	231.27	247	238.65	241.257	7.88421	149.09	188.2	98.28	145.19	45.0867	-0.735773	0.0515185
TKVG1_06040	TKV_RS04700		MBL fold metallo-hydrolase	246.76	196.93	218.91	222.53	221.282	20.407	218.87	167.97	154.79	180.543	33.8397	-0.3662	0.165257
TKVG1_06035	TKV_RS04705		DNA internalization-related competence protein ComEC/Rec2	89.73	93.99	103.19	78.22	91.2825	10.3627	116.57	89.84	96.56	100.99	13.9047	0.0530005	0.884205
TKVG1_06030	TKV_RS04710	holA	DNA polymerase III subunit delta	114.42	97.25	87.84	78.88	94.5975	15.1951	127.91	79.83	108.89	105.543	24.2141	0.0751162	0.824916
TKVG1_06025	TKV_RS04715	rpsT	30S ribosomal protein S20	2076.79	1718.44	1076.63	2257.59	1782.36	521.112	1856.69	915.19	842.39	1204.76	565.763	-0.600648	0.136863
TKVG1_06020	TKV_RS04720		phage holin family protein	89.08	145.61	63.84	97.39	98.98	34.2039	188.53	333.42	148.27	223.407	97.3777	1.00039	0.0384517
TKVG1_06015	TKV_RS04725	gpr	GPR endopeptidase	74.48	159.59	79.91	75.89	97.4675	41.4788	195.95	352.49	150.42	232.953	105.995	1.04604	0.0388967
TKVG1_06010	TKV_RS04730		stage II sporulation protein P	7.41	14.8	9.61	12.49	11.0775	3.23812	17.88	21.91	18.88	19.5567	2.09848	0.687945	0.118699
TKVG1_06005	TKV_RS04735		hypothetical protein	109.08	118.46	77.31	110.51	103.84	18.1616	185.6	83.91	95.97	121.827	55.5575	0.121001	0.756125
TKVG1_06000	TKV_RS04740		glycosyltransferase family 4 protein, GT4 family	77.7	82.64	67.4	69	74.185	7.22871	121.41	58.01	72.26	83.8933	33.2625	0.0723468	0.844613
TKVG1_05995	TKV_RS04745		hypothetical protein	230.07	205.79	157.73	187.78	195.343	30.4797	278.3	141	122.07	180.457	85.2618	-0.203014	0.608717
TKVG1_05990	TKV_RS04750	lepA	translation elongation factor 4	284.29	238.18	197.03	248.14	241.91	35.8841	295.06	168.48	152.06	205.2	78.2529	-0.317056	0.307888
TKVG1_05985	TKV_RS04755	hemW	radical SAM family heme chaperone HemW	240.67	211.73	180.92	225.74	214.765	25.4703	227.32	146.17	104.93	159.473	62.2701	-0.495316	0.127516
TKVG1_05980	TKV_RS04760	hrcA	heat-inducible transcriptional repressor HrcA	267.86	259.76	323.67	260.86	278.038	30.6324	206.92	147.09	99.64	151.217	53.7589	-0.916954	0.0123804
TKVG1_05975	TKV_RS04765	grpE	nucleotide exchange factor GrpE	255.89	240.38	337.79	227.91	265.493	49.5386	197.46	134.55	102.9	144.97	48.1335	-0.907508	0.0191104
TKVG1_05970	TKV_RS04770	dnaK	molecular chaperone DnaK	716.65	615.4	878	693.32	725.843	110.29	576.34	373.11	210.06	386.503	183.507	-0.928571	0.032993
TKVG1_05965	TKV_RS04775	dnaJ	molecular chaperone DnaJ	253.4	202.94	298.72	229.8	246.215	40.6226	209.17	134.8	71.92	138.63	68.7051	-0.849065	0.0591425
TKVG1_05960	TKV_RS04780	prmA	50S ribosomal protein L11 methyltransferase	327.26	284.56	388.27	266.42	316.627	54.1443	260.1	165.38	98.29	174.59	81.2972	-0.884136	0.040621
TKVG1_05955	TKV_RS04785		16S rRNA (uracil(1498)-N(3))-methyltransferase	315.16	291.26	379.81	283.55	317.445	43.7003	293.46	171.37	114.92	193.25	91.2589	-0.76587	0.0670892
TKVG1_05950	TKV_RS04790		ACT domain-containing protein	1014.79	863.16	869.5	865.27	903.18	74.4533	1096.57	499.6	745.52	780.563	300.024	-0.299038	0.374877
TKVG1_05945	TKV_RS04795		PFL family protein	786.23	645.18	760.56	695.45	721.855	63.8187	1000.85	438.96	647.59	695.8	284.03	-0.160606	0.682294
TKVG1_05940	TKV_RS04800	mtaB	tRNA (N(6)-L-threonylcarbamoyladenosine(37)-C(2))-methylthiotransferase MtaB	422.33	330.74	334	342.94	357.502	43.525	566.27	222.78	335.48	374.843	175.096	-0.043734	0.926184
TKVG1_05935	TKV_RS04805		histidine triad nucleotide-binding protein	610.43	494.79	476.59	555.61	534.355	60.9409	660.81	383.61	412.69	485.703	152.342	-0.222393	0.430804
TKVG1_05930	TKV_RS04810	rpsU	30S ribosomal protein S21	3778.84	3621.64	2792.1	3806.5	3499.77	478.753	4489.01	3299.71	4082.53	3957.08	604.493	0.108029	0.635409
TKVG1_05925	TKV_RS04815		GatB/YqeY domain-containing protein	1553.5	1402.35	1192.99	1423.41	1393.06	149.194	1773.55	1122.4	1476.67	1457.54	325.996	-0.0135667	0.962911
TKVG1_05920	TKV_RS13945			309.61	276.79	234.72	244.24	266.34	34.0085	424.06	264.38	400.15	362.863	86.1229	0.357224	0.214198
TKVG1_05915	TKV_RS04820	yqfC	sporulation protein YqfC	128.04	111.6	90.7	77.59	101.982	22.3143	249.63	113.67	202.82	188.707	69.07	0.732379	0.0578787
TKVG1_05910	TKV_RS04825	yqfD	sporulation protein YqfD	327.88	341.97	275.55	300.7	311.525	29.4718	387.56	327.61	374.17	363.113	31.4673	0.153372	0.463517
TKVG1_05905	TKV_RS04830		PhoH family protein	370.67	382.66	292.68	354.33	350.085	39.9926	402.57	376.09	424.45	401.037	24.2164	0.137414	0.562969
TKVG1_05900	TKV_RS04835		HDIG domain-containing metalloprotein	252.88	285.97	224.63	235.26	249.685	26.8492	354.21	280.61	325.2	320.007	37.0738	0.2822	0.178529
TKVG1_05895	TKV_RS04840	ybeY	rRNA maturation RNase YbeY	249.76	285.97	220.19	232.11	247.008	28.675	290.88	280.26	261.64	277.593	14.8013	0.103248	0.702596
TKVG1_05890	TKV_RS04845		diacylglycerol kinase	158.35	224.94	165.31	165.48	178.52	31.1244	211.72	193.89	219.41	208.34	13.0914	0.153696	0.635409
TKVG1_05885	TKV_RS04850	era	GTPase Era	319.67	339.93	252.88	243.72	289.05	47.9216	324.9	334.17	263.92	307.663	38.1653	0.0318927	0.92949
TKVG1_05880	TKV_RS04855			430.41	482.69	347.8	404.05	416.238	56.122	445.39	402.69	322.58	390.22	62.3474	-0.153696	0.533961
TKVG1_05875	TKV_RS04860	deoC	deoxyribose-phosphate aldolase	608.5	628.7	490.43	562.49	572.53	61.3463	600.6	557.33	421.38	526.437	93.5187	-0.181619	0.472188
TKVG1_05870	TKV_RS04865	recO	DNA repair protein RecO	401.63	394.94	314.57	389.54	375.17	40.7015	387.14	388.24	270.02	348.467	67.939	-0.161827	0.576776
TKVG1_05865	TKV_RS04870		DUF4342 domain-containing protein	266.48	275.28	185.46	262.07	247.322	41.6056	243.09	234.26	168.58	215.31	40.7095	-0.249359	0.3912
TKVG1_05860	TKV_RS04875		glycine--tRNA ligase	553.31	448.82	339.28	447.11	447.13	87.3855	358.82	258.91	240.23	285.987	63.7633	-0.694218	0.00318388
TKVG1_05855	TKV_RS04880		helix-turn-helix transcriptional regulator	436.47	590.69	873.96	383.99	571.278	220.033	494.99	622.87	552.61	556.823	64.044	-0.112207	0.844148
TKVG1_05850	TKV_RS04885		pyruvate, water dikinase regulatory protein	341.8	446.67	543.23	333.52	416.305	99.0561	295.87	488.15	446.29	410.103	101.119	-0.0719049	0.897932
TKVG1_05845	TKV_RS04890	ppdK	pyruvate, phosphate dikinase	601.64	781.99	961.12	517.86	715.653	197.295	427.22	737.87	718.33	627.807	173.988	-0.214286	0.689785
TKVG1_05840	TKV_RS04895		HD domain-containing protein	153.56	178.34	204.35	120.83	164.27	35.6189	118.49	137.65	150.19	135.443	15.9648	-0.316244	0.460029
TKVG1_05835	TKV_RS04900	rnr	ribonuclease R	154.74	180.98	207.73	129.07	168.13	33.8539	131.91	153.25	164.77	149.977	16.6728	-0.215914	0.617921
TKVG1_05830	TKV_RS04905	smpB	SsrA-binding protein SmpB	884.36	918.58	1128.38	1190.95	1030.57	151.886	921.46	1083.34	890.7	965.167	103.49	-0.154718	0.69846
TKVG1_05815	TKV_RS04920	nikB	nickel ABC transporter permease	207.22	179.51	115.99	118.39	155.278	45.4218	193.43	310.46	200.61	234.833	65.5929	0.524411	0.212936
TKVG1_05810	TKV_RS04925	nikC	nickel ABC transporter permease subunit NikC	200.7	199.07	160.63	128.47	172.218	34.5467	205.73	455.87	249.9	303.833	133.507	0.703143	0.137122
TKVG1_05805	TKV_RS04930		ABC transporter ATP-binding protein	139.52	130.33	141.59	85.2	124.16	26.4303	131.2	339.6	248.49	239.763	104.474	0.787323	0.124518
TKVG1_05800	TKV_RS04935		ABC transporter ATP-binding protein	255.4	267.84	262.86	157.07	235.793	52.7301	246.02	667.99	390.61	434.873	214.439	0.729347	0.161587
TKVG1_05795	TKV_RS04940		hypothetical protein	278.75	277.38	252.32	175.26	245.928	48.653	237.53	688.08	428.41	451.34	226.149	0.726944	0.165709
TKVG1_05790	TKV_RS04945		methyltransferase	191.8	184.07	182.26	142.84	175.243	21.9943	199.74	498.85	388.35	362.313	151.245	0.89451	0.0618476
TKVG1_05785	TKV_RS04950		ABC transporter substrate-binding protein	186.49	169.18	157.05	110.35	155.768	32.5994	153.82	490.87	307.98	317.557	168.729	0.855889	0.108324
TKVG1_05780	TKV_RS04955	cobN	cobaltochelatase subunit CobN	194.11	181.99	181.87	115.7	168.418	35.611	168.44	501.4	322.9	330.913	166.625	0.808851	0.124518
TKVG1_05775	TKV_RS04960		ABC transporter substrate-binding protein	189.77	206.5	181.85	111.02	172.285	42.116	165.99	541.17	352.57	353.243	187.591	0.850543	0.120399
TKVG1_05770	TKV_RS04965		cobaltochelatase subunit CobN	163.94	173.64	174.23	98.29	152.525	36.4632	130.9	485.83	313.66	310.13	177.491	0.822253	0.144205
TKVG1_05765	TKV_RS04970	nikC	nickel ABC transporter permease subunit NikC	146.29	147.65	155.18	82.12	132.81	34.0188	129.14	424.37	280.1	277.87	147.628	0.858571	0.122624
TKVG1_05760	TKV_RS13950		dipeptide ABC transporter ATP-binding protein	162.39	149.67	175.67	94.49	145.555	35.66	128.36	476.32	299.67	301.45	173.987	0.835711	0.140842
TKVG1_05755	TKV_RS04980		ABC transporter substrate-binding protein	114.16	119.9	141.41	72.24	111.928	28.9417	105.69	371.73	249.63	242.35	133.169	0.883718	0.120399
TKVG1_05750	TKV_RS04985		ABC transporter substrate-binding protein	80.25	74.81	89.59	46.07	72.68	18.7606	55.73	253.95	155.71	155.13	99.1113	0.84719	0.15401
TKVG1_05745	TKV_RS04990		AAA family ATPase	78.96	92.14	93.62	50.66	78.845	19.912	67.04	235.83	160.35	154.407	84.5518	0.771471	0.175992
TKVG1_05740	TKV_RS04995			117.4	119.69	101.02	68.28	101.597	23.7167	118.13	346.65	253.01	239.263	114.879	1.0267	0.0515185
TKVG1_05735	TKV_RS05000		selenium metabolism-associated LysR family transcriptional regulator	45.63	46.27	44.95	44.07	45.23	0.94262	36.58	69.33	50.13	52.0133	16.456	0.149677	0.758265
TKVG1_05730	TKV_RS13480			24.24	26.25	29.35	23.51	25.8375	2.6126	16.86	45.84	49.13	37.2767	17.7577	0.417919	0.457366
TKVG1_05725	TKV_RS13485		NAD(P)/FAD-dependent oxidoreductase	32.89	20.62	29.06	27.18	27.4375	5.12858	22	44.96	24.51	30.49	12.5941	0.0967138	0.868895
TKVG1_05720	TKV_RS05010		alpha/beta hydrolase	38.44	19.43	29.03	22.11	27.2525	8.48443	29.32	43.14	45.85	39.4367	8.86545	0.423523	0.387659
TKVG1_05715	TKV_RS05015		4Fe-4S binding protein	49.22	38.98	36.71	29.21	38.53	8.25941	49.46	24.85	61.71	45.34	18.7722	0.133445	0.818019
TKVG1_05710	TKV_RS05020		M48 family metallopeptidase	46.42	45.32	40.29	32.16	41.0475	6.49819	72.6	52.65	64.75	63.3333	10.0502	0.524204	0.0774943
TKVG1_05705	TKV_RS05025		B12-binding domain-containing radical SAM protein	9.83	14.5	11.5	10.67	11.625	2.03431	21.2	14.2	29.14	21.5133	7.47493	0.741172	0.0835225
TKVG1_05700	TKV_RS05030		glycerophosphodiester phosphodiesterase	8.95	13.39	19.68	13.96	13.995	4.40222	23.47	10.31	12.81	15.53	6.98893	0.0153565	0.983662
TKVG1_05695	TKV_RS05035		MFS transporter	10.75	6.47	8.99	5.61	7.955	2.35142	7.54	10.57	6.32	8.14333	2.18829	-0.040684	0.949492
TKVG1_05690	TKV_RS05040			174.16	165.32	90.76	153.08	145.83	37.717	164.42	122.77	64.89	117.36	49.9851	-0.347489	0.419182
TKVG1_05685	TKV_RS05045		undecaprenyl-diphosphate phosphatase	54.84	61.81	29.37	63.24	52.315	15.7306	65.77	39.14	31.65	45.52	17.9324	-0.253108	0.555715
TKVG1_05680	TKV_RS05050		pro-sigmaK processing inhibitor BofA family protein	87.16	107.86	66.21	87.63	87.215	17.0059	131.26	82.6	94.32	102.727	25.3959	0.153458	0.666172
TKVG1_05675	TKV_RS05055	sspI	small acid-soluble spore protein SspI	56.52	38.08	28.99	34.38	39.4925	11.9495	80.45	46.73	80.16	69.1133	19.3851	0.661451	0.140842
TKVG1_05670	TKV_RS13490			7.19	1.89	5.99	3.71	4.695	2.36222	21.39	2.07	12.66	12.04	9.67491	0.660978	0.369013
TKVG1_05665	TKV_RS13805		kinase/pyrophosphorylase	18.91	17.23	9.11	33.82	19.7675	10.2993	60.63	55.91	52	56.18	4.32133	1.22891	0.0140911
TKVG1_05660	TKV_RS13810		kinase/pyrophosphorylase	18.88	14.18	16.48	20.86	17.6	2.89924	80.21	66.78	63.07	70.02	9.01765	1.70889	1.16646e-05
TKVG1_05655	TKV_RS05065	ppsA	phosphoenolpyruvate synthase	19.32	25	19.2	37.68	25.3	8.68571	79.37	146.13	117.15	114.217	33.4765	1.88574	3.35737e-06
TKVG1_05650	TKV_RS12350			25.19	26.48	10.5	6.5	17.1675	10.1544	12.49	5.44	4.75	7.56	4.28342	-0.821966	0.231389
TKVG1_05645	TKV_RS05070		MarR family transcriptional regulator	30.38	40.27	20.18	20.44	27.8175	9.56365	24.55	9.89	6.64	13.6933	9.54154	-0.918969	0.0908049
TKVG1_05640	TKV_RS05075		ATP-binding cassette domain-containing protein	26.85	49.35	20.55	26.6	30.8375	12.6807	34.73	15.77	15.02	21.84	11.1694	-0.510493	0.30046
TKVG1_05635	TKV_RS05080		ABC transporter permease	29.02	38.68	15.17	23.17	26.51	9.90219	25.86	7.96	9.38	14.4	9.95002	-0.82585	0.116534
TKVG1_05630	TKV_RS05085			25.19	31.13	18.29	22.26	24.2175	5.40665	32.34	13.06	11.71	19.0367	11.5408	-0.407237	0.372488
TKVG1_05625	TKV_RS05090		hypothetical protein	121.92	133.29	84	91.92	107.782	23.5777	145.7	85.02	53.06	94.5933	47.0561	-0.257208	0.555594
TKVG1_05620	TKV_RS13495		glycosyltransferase family 2 protein	84.51	108.87	69.93	91.25	88.64	16.1574	116.22	102.71	44.49	87.8067	38.1167	-0.0828634	0.874338
TKVG1_05615	TKV_RS13500		glycosyltransferase family 2 protein	125.89	133.08	68.75	106.53	108.562	28.8127	107.34	104.42	44.76	85.5067	35.3178	-0.354697	0.43744
TKVG1_05610	TKV_RS05100			111.73	89.19	60.23	86.4	86.8875	21.0817	141.58	71.18	62.31	91.69	43.433	-0.0148916	0.979121
TKVG1_05605	TKV_RS05105		response regulator	141.82	137.04	85.67	118.9	120.858	25.4512	213.24	96.54	132.22	147.333	59.7999	0.186202	0.617921
TKVG1_05600	TKV_RS05110			79.87	65.85	44.81	29.88	55.1025	22.1438	66.76	28.86	40.16	45.26	19.4579	-0.323871	0.527289
TKVG1_05595	TKV_RS05115	hfq	RNA chaperone Hfq	180.4	194.85	118.31	117.79	152.838	40.6006	179.38	106.74	67.69	117.937	56.6806	-0.422642	0.342123
TKVG1_05590	TKV_RS05120			72.48	107.88	80.17	67.78	82.0775	17.9438	94.35	57.34	48.37	66.6867	24.3734	-0.36368	0.364692
TKVG1_05585	TKV_RS05125		NfeD family protein	156.66	156.72	121.66	128.56	140.9	18.4491	124.24	107.86	80.68	104.26	22.002	-0.485264	0.0876002
TKVG1_05580	TKV_RS05130		SPFH domain-containing protein	183.57	182.47	193.75	187.58	186.843	5.10181	167.59	195.78	134.55	165.973	30.647	-0.224518	0.514431
TKVG1_05575	TKV_RS05135			165.84	165.43	190.7	123.04	161.252	28.0823	149.15	138.71	96.75	128.203	27.735	-0.389975	0.313229
TKVG1_05570	TKV_RS05140		glycosyltransferase family 2 protein	110.12	117.42	122.36	80.2	107.525	18.8978	103.3	81.37	74.23	86.3	15.1491	-0.382594	0.281112
TKVG1_05565	TKV_RS05145			114.37	89.09	128.46	69.6	100.38	26.1985	81.57	117.04	67.45	88.6867	25.5495	-0.215705	0.678822
TKVG1_05560	TKV_RS05150		hypothetical protein	50.37	54.87	66.6	33.79	51.4075	13.5923	54.41	47.5	37.16	46.3567	8.68165	-0.224733	0.622748
TKVG1_05555	TKV_RS05155		DUF1294 domain-containing protein	52.91	66.51	55.76	63.58	59.69	6.40463	75.16	53.4	60.35	62.97	11.1141	0.00266634	0.996601
TKVG1_05550	TKV_RS05160			101.47	92.44	85.78	100.56	95.0625	7.40092	117.56	81.58	80.04	93.06	21.2316	-0.112	0.72719
TKVG1_05545	TKV_RS05165	arsC	arsenate reductase (thioredoxin)	120.7	129.33	80.18	148.85	119.765	28.8979	162.18	112.97	113.04	129.397	28.3912	0.0385479	0.924665
TKVG1_05540	TKV_RS05170		hypothetical protein	49.96	55.49	51.33	46.67	50.8625	3.65257	78.97	40.17	71.58	63.5733	20.6019	0.224489	0.597791
TKVG1_05535	TKV_RS05175		phosphodiester glycosidase family protein	96.22	83.16	39.81	84.61	75.95	24.7922	264.41	62.82	226.93	184.72	107.219	1.00034	0.0579199
TKVG1_05530	TKV_RS05180		hypothetical protein	53	39.56	19.31	52.15	41.005	15.7147	230.81	41.36	201.37	157.847	101.949	1.46392	0.00964667
TKVG1_05525	TKV_RS05185	gnd	decarboxylating 6-phosphogluconate dehydrogenase	10.55	13.65	5.23	9.04	9.6175	3.4983	20.6	9.35	25.15	18.3667	8.13332	0.735983	0.153525
TKVG1_05520	TKV_RS05190	zwf	glucose-6-phosphate dehydrogenase	42.24	28.47	17.29	29.46	29.365	10.2043	37.39	36.75	33.77	35.97	1.93194	0.2356	0.550317
TKVG1_05515	TKV_RS05195		hypothetical protein	117.99	94.96	71.02	110.93	98.725	20.8314	106.61	62.28	61.19	76.6933	25.9143	-0.41105	0.270374
TKVG1_05510	TKV_RS05200	sdaAB	L-serine ammonia-lyase, iron-sulfur-dependent subunit beta	151.95	163.62	89.75	162.35	141.917	35.169	178.91	90.01	77.73	115.55	55.2138	-0.356649	0.374214
TKVG1_05505	TKV_RS05205	sdaAA	L-serine ammonia-lyase, iron-sulfur-dependent, subunit alpha	177.68	149.8	91.93	161.3	145.178	37.2962	157.48	116.2	88.85	120.843	34.5498	-0.311862	0.364692
TKVG1_05500	TKV_RS05210	pepF	oligoendopeptidase F	167.92	175.58	107.44	167	154.485	31.5983	160.99	105.17	98.39	121.517	34.3526	-0.404487	0.143164
TKVG1_05495	TKV_RS05215	aroB	3-dehydroquinate synthase	117.36	97.35	72.08	99.59	96.595	18.6343	103.53	74.39	70.44	82.7867	18.0725	-0.283185	0.284899
TKVG1_05490	TKV_RS05220	pheA	prephenate dehydratase	2961.72	2536.02	3686.71	2309.82	2873.57	605.729	2268.8	1231.89	2079.83	1860.17	552.252	-0.675511	0.0949846
TKVG1_05485	TKV_RS05225	aroF	3-deoxy-7-phosphoheptulonate synthase	2396.42	1944.94	3242.6	1851	2358.74	635.52	2088.06	930.22	1821.85	1613.38	606.419	-0.599015	0.195778
TKVG1_05480	TKV_RS05230		prephenate dehydrogenase/arogenate dehydrogenasefamily protein	939.15	852.11	1513.15	748.81	1013.3	342.192	733.38	390.19	644.82	589.463	178.166	-0.801947	0.0853267
TKVG1_05475	TKV_RS05235	aroA	3-phosphoshikimate 1-carboxyvinyltransferase	1080.97	913.4	1662.25	788.68	1111.33	386.313	830.99	429.49	658.58	639.687	201.416	-0.818623	0.0808709
TKVG1_05470	TKV_RS05240		response regulator transcription factor	1066.77	907.93	1658.7	839.3	1118.17	372.73	790.12	456.78	574.45	607.117	169.054	-0.901199	0.0437108
TKVG1_05465	TKV_RS05245		ATP-binding protein	784.44	630.54	1161.64	592.75	792.342	259.782	542.97	316.07	334.27	397.77	126.076	-1.00509	0.0229127
TKVG1_05460	TKV_RS05250		LysM peptidoglycan-binding domain-containing protein, CBM50 family	841.06	781.86	1520.73	609.31	938.24	400.578	545.2	452.93	357.64	451.923	93.7841	-1.01824	0.0376525
TKVG1_05455	TKV_RS05255		TMEM165/GDT1 family protein	143.04	107.52	98.95	85.42	108.733	24.6147	147.73	69.67	104.18	107.193	39.1171	-0.105506	0.803257
TKVG1_05450	TKV_RS05260		PIG-L family deacetylase	1.08	5.43	3.59	2.66	3.19	1.81756	7.26	2.48	9.09	6.27667	3.41295	0.636579	0.342123
TKVG1_05445	TKV_RS05265		ROK family transcriptional regulator	110.18	152.43	424.5	57.42	186.132	163.596	138.59	141.83	282.99	187.803	82.45	-0.0883454	0.915006
TKVG1_05440	TKV_RS05270			455.32	547.5	798.16	454.98	563.99	162.07	467.56	469.69	486.95	474.733	10.6334	-0.311078	0.485977
TKVG1_05435	TKV_RS05275	trxA	thioredoxin	251.73	407.31	845.64	120.09	406.192	315.61	224.59	329.78	385.19	313.187	81.5757	-0.351212	0.618001
TKVG1_05430	TKV_RS05280		aminotransferase class I/II-fold pyridoxal phosphate-dependent enzyme	462.57	297.76	210.23	341.94	328.125	105.02	568.02	232.1	415.42	405.18	168.194	0.202424	0.652569
TKVG1_05425	TKV_RS05285		ASKHA domain-containing protein	56.67	45.65	62.31	43.82	52.1125	8.85606	48.77	38.02	37.52	41.4367	6.35577	-0.400651	0.2521
TKVG1_05420	TKV_RS05290		ABC-ATPase domain-containing protein	97.52	74.88	103.61	81.78	89.4475	13.3759	72.32	69.72	57.7	66.58	7.79941	-0.479118	0.163903
TKVG1_05415	TKV_RS05295		IS3 family transposase	43.69	37	68.11	33.17	45.4925	15.6925	58.35	29.35	59.81	49.17	17.1801	-0.00388031	0.996601
TKVG1_05410	TKV_RS13145		hypothetical protein	55.34	66.34	64.73	57.09	60.875	5.46778	68.34	55.91	57.62	60.6233	6.7373	-0.0760433	0.881056
TKVG1_05405	TKV_RS12805		transposase	33.01	59.2	31.29	41.06	41.14	12.7709	35.61	35.78	41.01	37.4667	3.06979	-0.168114	0.76949
TKVG1_05400	TKV_RS13815		hypothetical protein	6.62	8.12	15.94	11.38	10.515	4.12658	25.16	3.81	15.54	14.8367	10.6924	0.232514	0.769343
TKVG1_05395	TKV_RS05305	pulA	type I pullulanase	73.52	69.56	41.83	63.71	62.155	14.1365	89.05	52.8	35.22	59.0233	27.4493	-0.149758	0.733912
TKVG1_05390	TKV_RS13820		hypothetical protein	0	0	0	4.66	1.165	2.33	17.91	5.2	0	7.70333	9.21369	0.521846	0.388731
TKVG1_05385	TKV_RS05310	glgB	1,4-alpha-glucan branching protein GlgB	419	563.13	538.68	277.12	449.482	131.034	554.41	1158.82	808.62	840.617	303.473	0.742559	0.138881
TKVG1_05380	TKV_RS05315		glucose-1-phosphate adenylyltransferase	234.31	355.77	354.14	143.48	271.925	102.798	370.18	901.4	667.63	646.403	266.245	0.993569	0.0698763
TKVG1_05375	TKV_RS05320	glgD	glucose-1-phosphate adenylyltransferase subunit GlgD	209.06	322.22	331.58	124.66	246.88	98.6885	303.12	755.1	518.56	525.593	226.072	0.851837	0.129744
TKVG1_05370	TKV_RS05325	glgA	glycogen synthase GlgA	236.21	382.63	394.84	158.96	293.16	114.886	310.4	999.6	619.36	643.12	345.214	0.872666	0.136339
TKVG1_05365	TKV_RS12365		sodium ion-translocating decarboxylase subunit beta	298.22	523.08	466.24	208.35	373.972	145.963	405.64	1398.8	957.35	920.597	497.599	1.00695	0.0853567
TKVG1_05360	TKV_RS13505		ABC transporter ATP-binding protein	193.86	297.69	242.03	95.48	207.265	85.7533	235.82	734.31	518.86	496.33	250.008	0.983307	0.0908049
TKVG1_05355	TKV_RS13510		hypothetical protein	245.05	402.91	371.45	136.39	288.95	122.468	362.56	1059.13	778.9	733.53	350.494	1.04082	0.0734114
TKVG1_05350	TKV_RS05335		ABC transporter permease	173.01	250.54	196.47	106.54	181.64	59.6703	246.18	595.93	496.1	446.07	180.162	1.07176	0.0388967
TKVG1_05345	TKV_RS05340		DUF2284 domain-containing protein	253.88	326.83	273.56	206.87	265.285	49.661	284.55	622.67	457.58	454.933	169.076	0.662596	0.158119
TKVG1_05340	TKV_RS05345		hypothetical protein	666.61	625.56	577.16	570.75	610.02	44.966	500.94	666.13	558.62	575.23	83.8383	-0.125102	0.730268
TKVG1_05335	TKV_RS05350	hydG	[FeFe] hydrogenase H-cluster radical SAM maturase HydG	1008.37	935.25	799.61	1035.01	944.56	105.436	796.59	702.13	622.68	707.133	87.0629	-0.474528	0.0179365
TKVG1_05330	TKV_RS05355		DUF4143 domain-containing protein	14.41	5.58	0	3.13	5.78	6.18999	129.34	16.6	138.09	94.6767	67.7578	2.25184	0.000617897
TKVG1_05325	TKV_RS05360		hypothetical protein	110.14	71.6	22.54	49.33	63.4025	37.0557	498.51	83.45	473.69	351.883	232.801	1.77249	0.00334477
TKVG1_05320	TKV_RS05365			430.47	441.94	229.6	415.89	379.475	100.484	786.63	294.16	675.39	585.393	258.275	0.492651	0.267838
TKVG1_05310	TKV_RS05375	hflX	GTPase HflX	34.59	42.28	25.67	33.38	33.98	6.79898	77.07	30.66	43.4	50.3767	23.9787	0.429503	0.277939
TKVG1_05305	TKV_RS05380		DUF3189 family protein	69.05	108.09	45.9	49.76	68.2	28.4562	158.73	165.65	115.85	146.743	26.9772	0.957032	0.0207428
TKVG1_05300	TKV_RS05385		NUDIX hydrolase	38.02	62.45	47.53	32.22	45.055	13.2028	66.97	149.36	128.04	114.79	42.7633	1.12348	0.0270717
TKVG1_05295	TKV_RS05390		YigZ family protein	868.45	709.72	493	919.2	747.592	191.753	848.46	584.23	543.2	658.63	165.673	-0.240528	0.45861
TKVG1_05290	TKV_RS05395		hypothetical protein	523.7	465.67	325.02	558.96	468.338	102.996	768.23	340.36	479.72	529.437	218.225	0.0789841	0.850015
TKVG1_05285	TKV_RS05400			406.43	384.25	300.55	461.77	388.25	66.9403	541.25	261.11	339.14	380.5	144.577	-0.118597	0.748635
TKVG1_05280	TKV_RS05405		TSUP family transporter	118.08	150.5	94.63	116.7	119.977	23.0106	172.93	140.25	117.51	143.563	27.8582	0.177455	0.569384
TKVG1_05275	TKV_RS05410		sulfite exporter TauE/SafE family protein	183.58	231.15	147.33	193.15	188.803	34.4454	177.95	179.48	175.2	177.543	2.16879	-0.136669	0.661099
TKVG1_05270	TKV_RS05415	cysK	cysteine synthase A	362.76	340.27	273.24	369.12	336.347	43.8543	295.82	237.67	189.9	241.13	53.0447	-0.53709	0.026169
TKVG1_05265	TKV_RS05420		YebC/PmpR family DNA-binding transcriptional regulator	428.6	376.6	252.11	444.13	375.36	87.0936	246.53	242.13	113.4	200.687	75.6245	-0.874431	0.0311602
TKVG1_05260	TKV_RS05425		chemotaxis protein CheW	118.6	99.32	52.86	164.34	108.78	46.1876	96.9	150.85	83.23	110.327	35.7536	0.00123263	0.998021
TKVG1_05255	TKV_RS05430		hypothetical protein	18.24	5.94	2.85	8.74	8.9425	6.64876	50.42	15.38	40.82	35.54	18.1069	1.4287	0.0179365
TKVG1_05250	TKV_RS05435	ruvC	crossover junction endodeoxyribonuclease RuvC	392.47	374.13	296.7	391.85	363.788	45.5261	373.71	269.12	259.13	300.653	63.4658	-0.342687	0.11471
TKVG1_05245	TKV_RS05440	ruvA	Holliday junction branch migration protein RuvA	367.98	345.55	270.59	368.37	338.122	46.268	410.1	227.81	253.74	297.217	98.6158	-0.266355	0.34498
TKVG1_05240	TKV_RS05445	ruvB	Holliday junction branch migration DNA helicase RuvB	453.54	394.56	320.49	440.19	402.195	60.0387	514.49	280.88	321.91	372.427	124.729	-0.193937	0.500846
TKVG1_05235	TKV_RS05450		DUF2905 domain-containing protein	428.72	529.01	311.51	432.34	425.395	89.004	473.81	326.81	291.58	364.067	96.6591	-0.285247	0.34498
TKVG1_05230	TKV_RS05455		SpoIID/LytB domain-containing protein	731.42	557.78	443.19	611.31	585.925	119.692	1017.31	395.93	651.54	688.26	312.313	0.122919	0.772732
TKVG1_05225	TKV_RS05460	queA	tRNA preQ1(34) S-adenosylmethionine ribosyltransferase-isomerase QueA	429.26	339.02	276.98	378.64	355.975	64.3223	698.4	234.27	436.3	456.323	232.712	0.228366	0.603198
TKVG1_05220	TKV_RS05465			266.49	248.65	241.03	275.94	258.027	16.0138	440.31	240.3	219.2	299.937	122.024	0.105304	0.789797
TKVG1_05215	TKV_RS05470		hypothetical protein	23.54	15.46	6.54	6.07	12.9025	8.30385	44.48	10.17	48.09	34.2467	20.929	0.944639	0.15401
TKVG1_05210	TKV_RS05475			38.8	32.77	23.72	16.78	28.0175	9.7228	64.34	22.83	42.27	43.1467	20.7689	0.459913	0.34498
TKVG1_05205	TKV_RS05480	tgt	tRNA guanosine(34) transglycosylase Tgt	147.32	106.41	92.4	118.26	116.097	23.3448	123.01	73.01	80.38	92.1333	26.9927	-0.396707	0.174146
TKVG1_05200	TKV_RS05485	yajC	preprotein translocase subunit YajC	174.28	137.28	111.13	178.77	150.365	32.0904	218.98	117.97	100.58	145.843	63.9322	-0.129173	0.766263
TKVG1_05195	TKV_RS05490		TIGR04086 family membrane protein	15.56	0.39	4.94	8.41	7.325	6.39726	32.33	12.8	9.32	18.15	12.4029	0.758546	0.284295
TKVG1_05190	TKV_RS12370	scfA	six-cysteine ranthipeptide SCIFF	607.89	479.26	258	518.17	465.83	148.654	469.76	238.23	160.28	289.423	160.966	-0.681566	0.140793
TKVG1_05185	TKV_RS05495	scfB	thioether cross-link-forming SCIFF peptide maturase	229.92	196.18	110.81	201.28	184.548	51.3523	206.78	136.39	94.48	145.883	56.7487	-0.380963	0.335981
TKVG1_05180	TKV_RS05500		gamma carbonic anhydrase family protein	219.77	182.45	113.11	214.03	182.34	48.9832	227.44	123.25	110.52	153.737	64.1455	-0.306111	0.432732
TKVG1_05175	TKV_RS05505	secD	protein translocase subunit SecD	600.24	571.26	442.56	600.05	553.527	75.2211	622.38	447.16	407.32	492.287	114.412	-0.240336	0.28562
TKVG1_05170	TKV_RS05510	secF	protein translocase subunit SecF	437.56	415.14	354.02	480.82	421.885	52.8211	449.77	351.84	297.62	366.41	77.1143	-0.272346	0.27159
TKVG1_05165	TKV_RS05515	ubiB	2-polyprenylphenol 6-hydroxylase	278.62	262.23	242.56	239.93	255.835	18.159	252.32	188.95	135.06	192.11	58.6938	-0.480529	0.103364
TKVG1_05160	TKV_RS05520	recJ	single-stranded-DNA-specific exonuclease RecJ	203.63	204.69	158.51	192.1	189.732	21.5818	191.44	146.25	107.15	148.28	42.1817	-0.419695	0.121908
TKVG1_05155	TKV_RS05525		adenine phosphoribosyltransferase	380.84	317.34	228.18	321.46	311.955	62.9358	374.23	225.58	218.88	272.897	87.8212	-0.262609	0.378447
TKVG1_05150	TKV_RS05530		bifunctional (p)ppGpp synthetase/guanosine-3',5'-bis(diphosphate) 3'-pyrophosphohydrolase	333.36	296.77	258.26	290.09	294.62	30.8111	427.26	210.52	255.39	297.723	114.403	-0.0830842	0.807086
TKVG1_05145	TKV_RS05535	dtd	D-aminoacyl-tRNA deacylase	197.1	165.68	174.78	163.58	175.285	15.3342	240.31	112.57	140.62	164.5	67.1347	-0.189518	0.610716
TKVG1_05140	TKV_RS05540		MBL fold metallo-hydrolase	242.74	235.09	239.56	225.46	235.713	7.52087	281.24	138.59	142.55	187.46	81.24	-0.419605	0.226378
TKVG1_05135	TKV_RS05550	hisS	histidine--tRNA ligase	286.53	208.39	142.14	224.44	215.375	59.3222	341.37	120.36	281.42	247.717	114.295	0.106197	0.835982
TKVG1_05130	TKV_RS05555	aspS	aspartate--tRNA ligase	265.66	178.23	159.02	214.65	204.39	46.9115	367.32	117.67	232.93	239.307	124.947	0.10712	0.830815
TKVG1_05120	TKV_RS05560		tRNA threonylcarbamoyladenosine dehydratase	253.59	204.99	132.47	234.32	206.343	53.1477	384.41	160.89	272.77	272.69	111.76	0.292726	0.463559
TKVG1_05115	TKV_RS05565		metal-sensitive transcriptional regulator	150	146.79	115.77	167.67	145.057	21.5755	188.72	112.45	172.81	157.993	40.2359	0.0494032	0.897932
TKVG1_05110	TKV_RS05570	trxA	thioredoxin	858.26	721	825.02	1197.66	900.485	206.564	722.35	454.99	417.94	531.76	166.092	-0.803486	0.0209914
TKVG1_05105	TKV_RS05575		hypothetical protein	0	0	0.75	0	0.1875	0.375	5.35	0	3.39	2.91333	2.70666	0.533099	0.372488
TKVG1_05100	TKV_RS13515		alanine racemase	1.47	2.32	1.23	4.55	2.3925	1.51245	9.11	0.42	2.59	4.04	4.52282	0.370864	0.635619
TKVG1_05095	TKV_RS13520		hypothetical protein	1.47	2.58	2.18	1.01	1.81	0.703657	6.08	2.54	0.49	3.03667	2.8279	0.385438	0.619099
TKVG1_05090	TKV_RS05585		Rrf2 family transcriptional regulator	120.07	88.12	203.55	129.53	135.317	48.8169	82.78	53.3	70.96	69.0133	14.8361	-0.95203	0.0453625
TKVG1_05085	TKV_RS05590	mnmA	tRNA 2-thiouridine(34) synthase MnmA	152.82	130.17	259.23	144.46	171.67	59.1177	116.69	125.46	69.16	103.77	30.2922	-0.723894	0.140448
TKVG1_05080	TKV_RS13150		hypothetical protein	1.8	35.91	17.98	4.64	15.0825	15.574	33.87	63.16	32.55	43.1933	17.3042	0.881948	0.212936
TKVG1_05075	TKV_RS05595		AI-2E family transporter	3.69	5.07	0.32	0.59	2.4175	2.33768	12.38	5.07	8.42	8.62333	3.65924	1.17411	0.0845313
TKVG1_05070	TKV_RS05600	alaS	alanine--tRNA ligase	292.66	232.36	326.12	248.67	274.952	42.5698	295.53	131.73	174.88	200.713	84.9007	-0.537487	0.17322
TKVG1_05065	TKV_RS05605		IreB family regulatory phosphoprotein	480.85	448.35	425.14	405.37	439.928	32.4473	603.31	266.25	324.35	397.97	180.187	-0.241632	0.509202
TKVG1_05060	TKV_RS05610	ruvX	Holliday junction resolvase RuvX	254.18	213.97	257.01	182.77	226.982	35.428	205.23	159.35	138.46	167.68	34.1555	-0.498353	0.139052
TKVG1_05055	TKV_RS05615		DUF1292 domain-containing protein	332.6	349.08	199.14	248.78	282.4	70.7785	387.58	124.32	298.15	270.017	133.866	-0.137403	0.785298
TKVG1_05050	TKV_RS05620		Fur family transcriptional regulator	287.32	232.6	398.53	284.1	300.637	69.9116	345.73	131.6	246.46	241.263	107.16	-0.403892	0.393294
TKVG1_05045	TKV_RS05625		ribonuclease J	581.16	538.46	899.18	471.7	622.625	189.793	620.97	378.49	457.74	485.733	123.64	-0.437685	0.332244
TKVG1_05040	TKV_RS05630		YlbF family regulator	703.05	665.27	1005.83	549.46	730.903	194.585	797.6	407.65	459.41	554.887	211.783	-0.480945	0.282545
TKVG1_05035	TKV_RS05635		QueT transporter family protein	428.27	402.08	703.35	370.62	476.08	153.335	517.75	303.42	328.72	383.297	117.125	-0.400906	0.386116
TKVG1_05030	TKV_RS05640	mltG	endolytic transglycosylase MltG	176.61	146.06	133.16	162.02	154.463	18.9035	287.24	151.19	216.91	218.447	68.038	0.392966	0.175992
TKVG1_05025	TKV_RS05645		O-methyltransferase	182.9	131.26	115.42	127.63	139.303	29.8443	258.32	107.4	236.18	200.633	81.4978	0.403464	0.334832
TKVG1_05020	TKV_RS05650		U32 family peptidase	105.46	100.81	71.75	98.05	94.0175	15.1566	172.71	76.02	114.61	121.113	48.672	0.256801	0.459837
TKVG1_05015	TKV_RS05655		penicillin-binding transpeptidase domain-containing protein	16.85	20.47	14.9	14.29	16.6275	2.78463	61.24	13.04	36.35	36.8767	24.1043	0.865788	0.0908049
TKVG1_05010	TKV_RS05660	sigK	RNA polymerase sporulation sigma factor SigK	18.41	20.9	16.51	14.03	17.4625	2.90995	53.73	18.32	34.73	35.5933	17.7208	0.807936	0.0764578
TKVG1_05005	TKV_RS05665		YqeG family HAD IIIA-type phosphatase	243.31	196.28	148.75	180.45	192.197	39.3905	189.66	89.66	71.94	117.087	63.4718	-0.74823	0.0591425
TKVG1_05000	TKV_RS05670	aroE	shikimate dehydrogenase	370.15	331.26	324.05	333.13	339.648	20.7084	297.71	166.17	162.07	208.65	77.1555	-0.770521	0.0064882
TKVG1_04995	TKV_RS05675	gspE	type II secretion system ATPase GspE	640.84	576.23	532.5	621.41	592.745	48.4321	554.62	455.4	324.23	444.75	115.564	-0.476307	0.0825071
TKVG1_04990	TKV_RS05680		type IV pilus twitching motility protein PilT	722.66	645.05	575.06	677.16	654.982	62.0708	659.2	484.68	372.9	505.593	144.291	-0.442552	0.0949713
TKVG1_04985	TKV_RS05685		type II secretion system F family protein	631.47	626.79	574.17	598.54	607.742	26.6933	610.28	382.11	358.1	450.163	139.184	-0.512328	0.0437431
TKVG1_04980	TKV_RS05690		prepilin-type N-terminal cleavage/methylation domain-containing protein	2949.81	3820.93	3815.55	3397.14	3495.86	414.644	2946.83	2857.72	1772.09	2525.55	654.032	-0.518017	0.150934
TKVG1_04975	TKV_RS05695		A24 family peptidase	329.08	332.82	316.21	285.8	315.977	21.3392	370.37	264.09	242.01	292.157	68.6285	-0.196579	0.461785
TKVG1_04970	TKV_RS05700		prepilin-type N-terminal cleavage/methylation domain-containing protein	342.37	344.55	304.63	305.03	324.145	22.3214	397.91	218.53	258.81	291.75	94.1174	-0.238714	0.395984
TKVG1_04965	TKV_RS05705		prepilin-type N-terminal cleavage/methylation domain-containing protein	311.87	344.24	319.58	275.86	312.888	28.2833	377.07	246.11	269.42	297.533	69.8599	-0.160093	0.576776
TKVG1_04960	TKV_RS05710		prepilin-type N-terminal cleavage/methylation domain-containing protein	358.97	349.64	335.39	343.94	346.985	9.90632	433.97	324.29	285.7	347.987	76.923	-0.0798551	0.772732
TKVG1_04955	TKV_RS05715		pilus assembly PilX N-terminal domain-containingprotein	178.52	184.18	155.46	184.14	175.575	13.671	201.04	147.66	134.05	160.917	35.4079	-0.200897	0.400424
TKVG1_04950	TKV_RS05720		competence protein ComFB	361.59	364.85	343.51	306.21	344.04	26.91	389.99	254.5	280.05	308.18	71.9921	-0.236923	0.388385
TKVG1_04945	TKV_RS05725	pilM	type IV pilus assembly protein PilM	262.31	283.39	237.86	229.88	253.36	24.3137	288.61	207.92	219.57	238.7	43.6141	-0.162883	0.477621
TKVG1_04940	TKV_RS05730		PilN domain-containing protein	163.1	178.33	125.77	131.66	149.715	25.1484	191.43	99.57	143.74	144.913	45.9412	-0.124395	0.719816
TKVG1_04935	TKV_RS05735	pilO	type 4a pilus biogenesis protein PilO	194	164.8	153.31	164.87	169.245	17.3746	212.1	137.46	167.13	172.23	37.5804	-0.0556212	0.840485
TKVG1_04930	TKV_RS05740		shikimate kinase	136.33	143.6	130.47	106.85	129.312	15.9089	187.75	94.6	114.12	132.157	49.1246	-0.0679994	0.86443
TKVG1_04925	TKV_RS05745		TIM barrel protein	250.69	212.31	189.64	185.77	209.602	29.7882	236.36	150.18	169.31	185.283	45.256	-0.253256	0.333033
TKVG1_04920	TKV_RS05750	proB	glutamate 5-kinase	260.44	252.56	259.75	221.24	248.498	18.5177	245.54	193.52	160.36	199.807	42.9366	-0.387094	0.169455
TKVG1_04915	TKV_RS05755		glutamate-5-semialdehyde dehydrogenase	187.29	214.21	237.1	167.36	201.49	30.5307	179.06	159.52	142.01	160.197	18.5343	-0.395701	0.2426
TKVG1_04910	TKV_RS05760	aroQ	type II 3-dehydroquinate dehydratase	127.72	130.83	148.44	97.46	126.112	21.1685	111.44	110.7	97	106.38	8.13174	-0.300067	0.422223
TKVG1_04905	TKV_RS05765		aminopeptidase P family protein	240.96	291.82	348.59	217.37	274.685	58.2464	205.39	251.21	215.94	224.18	23.9957	-0.336202	0.419182
TKVG1_04900	TKV_RS05770	efp	elongation factor P	842.53	842.58	761.61	856.12	825.71	43.2091	627.98	640.58	571.48	613.347	36.8009	-0.477113	0.040621
TKVG1_04895	TKV_RS05775		hypothetical protein	674.61	687.61	579.04	568.06	627.33	62.4872	482.52	548.23	459.1	496.617	46.2069	-0.376882	0.173542
TKVG1_04890	TKV_RS05780	spoIIIAA	stage III sporulation protein AA	6.98	9.47	1.62	3.6	5.4175	3.4923	18.73	9.21	15.5	14.48	4.84127	1.09722	0.0547254
TKVG1_04885	TKV_RS05785	spoIIIAB	stage III sporulation protein SpoIIIAB	6.81	7.16	1.58	1.17	4.18	3.2464	18.01	7.19	19.7	14.9667	6.78759	1.24642	0.0546747
TKVG1_04880	TKV_RS05790	spoIIIAC	stage III sporulation protein AC	7.36	10.83	6.54	6.83	7.89	1.98919	10.21	16.94	25.15	17.4333	7.48221	0.768483	0.2426
TKVG1_04875	TKV_RS05795	spoIIIAD	stage III sporulation protein AD	7.15	3.16	2.51	3.88	4.175	2.06075	18.65	6.07	7.95	10.89	6.78578	0.904883	0.163467
TKVG1_04870	TKV_RS05800	spoIIIAE	stage III sporulation protein AE	3.4	3.17	3.49	4.54	3.65	0.608441	11.22	4.49	10.12	8.61	3.61017	0.945083	0.0672122
TKVG1_04865	TKV_RS05805	spoIIIAF	stage III sporulation protein AF	3	1.05	2.78	0.77	1.9	1.15236	8.43	3.46	6.04	5.97667	2.48561	1.01948	0.126556
TKVG1_04860	TKV_RS05810	spoIIIAG	stage III sporulation protein AG	4.73	2.09	2.49	4.37	3.42	1.32318	2.96	9.46	2.75	5.05667	3.81484	0.334084	0.652569
TKVG1_04855	TKV_RS05815		SpoIIIAH-like family protein	11.2	9.53	8.89	8.8	9.605	1.11189	5.29	12.29	16.36	11.3133	5.59925	0.177847	0.788383
TKVG1_04850	TKV_RS05820		Asp23/Gls24 family envelope stress response protein	1101.98	1160.69	956.82	1302.7	1130.55	143.228	961.46	856.76	434.3	750.84	279.085	-0.619474	0.100658
TKVG1_04845	TKV_RS05825	amaP	alkaline shock response membrane anchor protein AmaP	558.84	566.23	448.84	548.29	530.55	54.9685	596.72	451.69	402.96	483.79	100.79	-0.205672	0.342123
TKVG1_04840	TKV_RS05830		DUF2273 domain-containing protein	497.45	440.07	401.44	452.63	447.898	39.5703	551.27	352.17	322.76	408.733	124.313	-0.213731	0.444776
TKVG1_04835	TKV_RS05835	nusB	transcription antitermination factor NusB	579.83	517.15	442.58	502.16	510.43	56.3724	626.67	386.66	376.86	463.397	141.484	-0.221885	0.392958
TKVG1_04830	TKV_RS05840			602.39	606.01	443.7	534.97	546.768	76.0825	651.32	406.29	400.38	485.997	143.205	-0.246913	0.336578
TKVG1_04825	TKV_RS05845	xseA	exodeoxyribonuclease VII large subunit	587.03	588.39	447.26	577.23	549.977	68.6586	658.57	459.81	406.16	508.18	132.975	-0.189922	0.425875
TKVG1_04820	TKV_RS05850	xseB	exodeoxyribonuclease VII small subunit	423.51	470.03	320.12	386.1	399.94	63.327	443.28	301.63	286.53	343.813	86.4709	-0.286881	0.273261
TKVG1_04815	TKV_RS05855		farnesyl diphosphate synthase	332.26	325.39	246.14	317.59	305.345	39.9224	383.06	250.56	199.11	277.577	94.9043	-0.216077	0.468159
TKVG1_04810	TKV_RS05860		hypothetical protein	252.89	234.59	135.41	207.96	207.713	51.6111	526.45	156.33	510.69	397.823	209.288	0.743641	0.126235
TKVG1_04805	TKV_RS05865	dxs	1-deoxy-D-xylulose-5-phosphate synthase	234.68	183.91	166.7	216.91	200.55	30.8503	522.81	150.27	481.35	384.81	204.173	0.734984	0.122616
TKVG1_04800	TKV_RS05870		TlyA family RNA methyltransferase	237.83	216.93	204.26	216.05	218.767	13.9596	402.86	149.31	336.12	296.097	131.428	0.304626	0.462218
TKVG1_04795	TKV_RS05875		NAD(+)/NADH kinase	238.63	217.25	185.01	170.33	202.805	30.8943	318.59	248.45	245.68	270.907	41.3182	0.334496	0.165095
TKVG1_04790	TKV_RS05880		arginine repressor	187.48	200.44	156.16	171.97	179.012	19.1718	233.99	245.35	238.67	239.337	5.70927	0.35282	0.178529
TKVG1_04785	TKV_RS05885	recN	DNA repair protein RecN	109.68	108.45	107.41	92.38	104.48	8.11985	125.37	153.44	126.93	135.247	15.7752	0.297883	0.36408
TKVG1_04780	TKV_RS05890	spoIVB	SpoIVB peptidase	49.54	51.96	51.11	33.27	46.47	8.85691	62.41	82.97	80.15	75.1767	11.1458	0.586701	0.13913
TKVG1_04775	TKV_RS05895	spo0A	sporulation transcription factor Spo0A	174.47	210.58	137.24	162.89	171.295	30.4619	211.5	345.11	221.31	259.307	74.4696	0.526477	0.178431
TKVG1_04770	TKV_RS12825			45.89	41.94	29.93	22.64	35.1	10.7268	33.62	79.27	52.17	55.02	22.9581	0.52907	0.340012
TKVG1_04765	TKV_RS05905	steA	putative cytokinetic ring protein SteA	285.44	264.03	205.54	264.7	254.928	34.3923	325.18	177.45	253.53	252.053	73.8761	-0.0959307	0.754448
TKVG1_04760	TKV_RS12390			463.93	410.56	365.04	462.72	425.562	47.4018	450.15	286.71	321.23	352.697	86.1439	-0.3448	0.143833
TKVG1_04755	TKV_RS05915			512.68	536.16	481.79	558.22	522.212	32.741	504.03	364.56	339.98	402.857	88.4764	-0.449102	0.0420538
TKVG1_04750	TKV_RS05925		copper transporter	350.72	310.91	298.75	325.07	321.363	22.3323	404.87	252.07	264.28	307.073	84.9141	-0.153765	0.550636
TKVG1_04745	TKV_RS05930		glycosyltransferase family 2 protein, GT2 family	443.77	351.16	294.92	367.51	364.34	61.4058	391.8	224.14	244.99	286.977	91.3763	-0.41526	0.131067
TKVG1_04740	TKV_RS05935		UDP-N-acetylmuramyl pentapeptide phosphotransferase	228.99	237.52	184.84	201.22	213.143	24.4171	273.01	155.2	154.92	194.377	68.0986	-0.217575	0.452171
TKVG1_04735	TKV_RS05940		DUF3866 family protein	221.93	225.86	145.82	236.21	207.455	41.5291	289.84	173.69	149.9	204.477	74.8777	-0.100907	0.78115
TKVG1_04730	TKV_RS05945		NUDIX hydrolase	343.07	333.69	238.86	332.16	311.945	48.9615	328.07	220.54	151.36	233.323	89.0459	-0.476538	0.15133
TKVG1_04725	TKV_RS05950		endonuclease Q family protein	288.68	259.72	187.71	257.53	248.41	42.8845	282.26	163.31	141.87	195.813	75.6286	-0.411465	0.188234
TKVG1_04720	TKV_RS05955	spoIIM	stage II sporulation protein M	246.24	262.03	159.24	219.56	221.767	45.22	277.19	193.54	119.95	196.893	78.6736	-0.234439	0.54379
TKVG1_04715	TKV_RS05960		site-specific tyrosine recombinase	187.18	210.97	111.97	192.56	175.67	43.6712	215.5	150.83	132.55	166.293	43.5834	-0.139023	0.685371
TKVG1_04710	TKV_RS05965		D-alanyl-D-alanine carboxypeptidase family protein	145.26	179.88	85.94	118.16	132.31	39.9208	185.31	204.57	123.8	171.227	42.1865	0.306472	0.436907
TKVG1_04705	TKV_RS05970	spoIIAA	anti-sigma F factor antagonist	3.47	12.76	5.78	4.47	6.62	4.2012	17.19	5.99	10.46	11.2133	5.63787	0.475254	0.48309
TKVG1_04700	TKV_RS05975	spoIIAB	anti-sigma F factor	12.81	13.82	4.87	16.34	11.96	4.95428	33.76	18.25	28.48	26.83	7.88555	0.926605	0.0618476
TKVG1_04695	TKV_RS05980	sigF	RNA polymerase sporulation sigma factor SigF	14.54	10.54	8.52	13.18	11.695	2.69035	25.33	10.64	18.19	18.0533	7.34595	0.471545	0.307888
TKVG1_04690	TKV_RS13155		dodecin family protein	108.52	147.09	71.17	33.24	90.005	48.9167	107.58	219.89	147.3	158.257	56.951	0.647553	0.269988
TKVG1_04685	TKV_RS05990	spoVAC	stage V sporulation protein AC	51.15	80.14	23.53	22.18	44.25	27.3989	50.39	137.72	64.23	84.1133	46.9376	0.73031	0.233772
TKVG1_04680	TKV_RS05995	spoVAD	stage V sporulation protein AD	28.87	41.97	24.9	21.48	29.305	8.96709	43.43	81.55	57.49	60.8233	19.2774	0.909986	0.0467737
TKVG1_04675	TKV_RS06000	spoVAE	stage V sporulation protein AE	17.95	19.3	12.69	7.57	14.3775	5.35983	23.86	53.56	25.03	34.15	16.8197	0.975608	0.0904171
TKVG1_04670	TKV_RS06005		CCA tRNA nucleotidyltransferase	100.53	89.56	59.39	90.54	85.005	17.7814	138.06	59.58	107.76	101.8	39.578	0.164586	0.682294
TKVG1_04665	TKV_RS06010		site-2 protease family protein	95.27	80.94	65.55	85.88	81.91	12.421	125.23	80.86	84	96.6967	24.7604	0.152659	0.607415
TKVG1_04660	TKV_RS06015		segregation/condensation protein A	90.93	98.51	72.52	74.7	84.165	12.606	134.52	74.24	97.65	102.137	30.3894	0.184703	0.550636
TKVG1_04655	TKV_RS06020	scpB	SMC-Scp complex subunit ScpB	109.45	102.37	66.39	90.08	92.0725	18.8995	156.06	80.73	116.14	117.643	37.6875	0.259401	0.43744
TKVG1_04650	TKV_RS06025		DUF1002 domain-containing protein	114.88	121.99	75.38	109.92	105.543	20.7095	134.66	69.51	95.98	100.05	32.7651	-0.148781	0.659605
TKVG1_04645	TKV_RS06030		DUF2953 domain-containing protein	55.48	43.74	22.32	35.77	39.3275	13.9318	48.6	27.82	43.29	39.9033	10.796	-0.0278024	0.958605
TKVG1_04640	TKV_RS06035	ytfJ	GerW family sporulation protein	407.27	467.85	249.09	344.47	367.17	93.457	369.19	337.35	278.87	328.47	45.8101	-0.200427	0.521109
TKVG1_04635	TKV_RS06040		transposase	167.86	159.73	201.15	174.84	175.895	17.9332	166.41	165.84	151.44	161.23	8.48318	-0.192499	0.584931
TKVG1_04630	TKV_RS06045		D-alanyl-D-alanine carboxypeptidase family protein	105.23	95.92	46.88	59.51	76.885	28.0948	101.8	85.33	69.28	85.47	16.2605	0.0981662	0.824561
TKVG1_04625	TKV_RS06050		sulfide/dihydroorotate dehydrogenase-like FAD/NAD-binding protein	1.2	2.21	0.67	0	1.02	0.932988	7.87	3.11	2.11	4.36333	3.07775	1.17575	0.0936812
TKVG1_04620	TKV_RS06055		FAD-dependent oxidoreductase	45.14	43.88	18.02	43.76	37.7	13.1348	76.91	22.47	66.97	55.45	28.9907	0.409158	0.444715
TKVG1_04615	TKV_RS06060		pseudouridine synthase	195.42	142.98	105.39	139.24	145.757	37.1757	238.4	82.81	201.69	174.3	81.3309	0.154674	0.756125
TKVG1_04610	TKV_RS06065		GNAT family N-acetyltransferase	142.44	143.56	84.77	129.31	125.02	27.6023	290.88	60.83	196.92	182.877	115.666	0.371981	0.491481
TKVG1_04605	TKV_RS06070	speE	polyamine aminopropyltransferase	412.13	366.04	277.1	402.58	364.462	61.5354	396.1	239.34	223.06	286.167	95.5524	-0.417787	0.140793
TKVG1_04600	TKV_RS06075	speB	agmatinase	511.34	384.77	295.49	495.03	421.657	101.169	518.41	292.14	245.32	351.957	146.041	-0.328414	0.373214
TKVG1_04595	TKV_RS06080	pyc	pyruvate carboxylase	1548.92	1566.34	677.67	1750.04	1385.74	480.736	1337.54	1446.03	1006.39	1263.32	229.025	-0.14846	0.753112
TKVG1_04590	TKV_RS06085	safA	SafA/ExsA family spore coat assembly protein	16.8	19.24	10.79	7.7	13.6325	5.31512	19.99	19.78	9.77	16.5133	5.84084	0.156285	0.807235
TKVG1_04585	TKV_RS06090		hypothetical protein	14.59	13.9	12.41	12.93	13.4575	0.975342	28.47	11.02	22.01	20.5	8.82245	0.447415	0.342123
TKVG1_04580	TKV_RS06095	surE	5'/3'-nucleotidase SurE	41.45	51.03	41.15	52.85	46.62	6.18899	33.67	22.98	16.6	24.4167	8.62521	-0.952561	0.00658833
TKVG1_04575	TKV_RS13825		hypothetical protein	155.11	87.13	90.79	177.09	127.53	45.4563	71.6	165.01	123.85	120.153	46.8146	-0.0860709	0.895111
TKVG1_04570	TKV_RS06100		MurR/RpiR family transcriptional regulator	77.37	73.71	63.87	76.33	72.82	6.16217	71.36	114.74	63.75	83.2833	27.5067	0.14063	0.756125
TKVG1_04565	TKV_RS06105		hypothetical protein	77.76	74.17	60.57	73.41	71.4775	7.51504	63.63	79.13	51.93	64.8967	13.6442	-0.182379	0.613718
TKVG1_04560	TKV_RS06110		histidine phosphatase family protein	85.84	64.59	63.33	56.61	67.5925	12.6593	85.79	91.3	65.57	80.8867	13.5477	0.18417	0.621147
TKVG1_04555	TKV_RS06115		NAD(P)/FAD-dependent oxidoreductase	70.61	62.07	44.8	60.78	59.565	10.7664	72.01	77.48	70.18	73.2233	3.79824	0.241748	0.397747
TKVG1_04550	TKV_RS06120		hypothetical protein	4.41	3.31	0	5.2	3.23	2.28857	9.38	21.78	12.05	14.4033	6.52638	1.43226	0.0317278
TKVG1_04545	TKV_RS06125	aroH	chorismate mutase	374.3	409.79	376.54	349.02	377.413	24.9325	257	287.39	297.35	280.58	21.0193	-0.463249	0.127516
TKVG1_04540	TKV_RS06130	cmk	(d)CMP kinase	307.03	347.11	337.28	286.46	319.47	27.8423	322.36	249.09	316.49	295.98	40.7139	-0.181329	0.548529
TKVG1_04535	TKV_RS06135		lysophospholipid acyltransferase family protein	291.79	315.18	257.99	263.35	282.077	26.5897	320.93	238.13	255.52	271.527	43.6591	-0.128667	0.567134
TKVG1_04530	TKV_RS06140		4-hydroxy-3-methylbut-2-enyl diphosphate reductase	240.38	226.55	232.77	249.51	237.303	9.9105	288.26	188.82	221.49	232.857	50.6851	-0.113965	0.677402
TKVG1_04525	TKV_RS06145		S1 RNA-binding domain-containing protein	267.8	276.24	269.73	263.17	269.235	5.4209	275.95	226.23	213.48	238.553	33.0079	-0.24836	0.30046
TKVG1_04520	TKV_RS06150	speD	adenosylmethionine decarboxylase	2448.71	2209.49	1990.36	2659.18	2326.93	289.995	2155.71	1714.49	1565.18	1811.79	307.054	-0.425213	0.0561837
TKVG1_04515	TKV_RS06155		protein-glutamate O-methyltransferase CheR	231.77	194.68	145.05	185.46	189.24	35.6157	299.1	108.72	263.66	223.827	101.248	0.14068	0.76876
TKVG1_04510	TKV_RS06160	miaB	tRNA (N6-isopentenyl adenosine(37)-C2)-methylthiotransferase MiaB	270.09	238.94	196.24	254.94	240.053	31.8573	447.42	159.56	383.89	330.29	151.23	0.331649	0.436477
TKVG1_04505	TKV_RS06165	mutS	DNA mismatch repair protein MutS	186.02	160.39	142.82	159.63	162.215	17.8219	248.34	114.92	209.37	190.877	68.6056	0.134709	0.721317
TKVG1_04500	TKV_RS06170	mutL	DNA mismatch repair endonuclease MutL	144.52	137.12	136.42	134.96	138.255	4.2725	157.15	98.74	115.19	123.693	30.1191	-0.246043	0.336578
TKVG1_04495	TKV_RS06175	miaA	tRNA (adenosine(37)-N6)-dimethylallyltransferaseMiaA	143.49	116.92	116.77	133.74	127.73	13.1843	144.84	109.7	98.27	117.603	24.2701	-0.193849	0.459837
TKVG1_04490	TKV_RS06180	hfq	RNA chaperone Hfq	554.66	515.01	388.78	614.71	518.29	95.574	528.84	345.75	352.45	409.013	103.827	-0.404799	0.136998
TKVG1_04485	TKV_RS06185	proC	pyrroline-5-carboxylate reductase	540.43	480.67	348.3	549.31	479.677	92.7372	466.38	381.47	235.66	361.17	116.692	-0.452364	0.187056
TKVG1_04480	TKV_RS06190	rnhA	ribonuclease HI	806.26	730.79	521.82	816.58	718.862	136.815	673.15	574.1	362.21	536.487	158.846	-0.462712	0.160182
TKVG1_04475	TKV_RS06195		tyrosine recombinase XerC	66.86	57.14	48.13	58.47	57.65	7.66783	95.97	55.08	68.27	73.1067	20.8697	0.251308	0.372792
TKVG1_04470	TKV_RS06200		methionine gamma-lyase family protein	488.07	457.03	304.48	456.26	426.46	82.6589	393.63	362	209.27	321.633	98.5863	-0.439832	0.204308
TKVG1_04465	TKV_RS06205	spoVK	stage V sporulation protein K	730.8	614.09	388.08	660.52	598.372	148.177	565.77	528.83	310.92	468.507	137.718	-0.379713	0.309117
TKVG1_04460	TKV_RS06210	purB	adenylosuccinate lyase	590.64	542.77	331.51	568.96	508.47	119.586	477.42	429.17	252.77	386.453	118.26	-0.423784	0.243138
TKVG1_04455	TKV_RS06215		pyridoxal phosphate-dependent aminotransferase	603.9	576.56	344.24	598.75	530.862	124.979	451.01	468.33	288.52	402.62	99.1923	-0.417533	0.23464
TKVG1_04450	TKV_RS06220		PHP domain-containing protein	128.7	93.44	64.04	74.21	90.0975	28.4765	132.96	82.26	70.78	95.3333	33.0873	0.0050126	0.991661
TKVG1_04445	TKV_RS06225		stage V sporulation protein S	545.18	418.23	298.25	448.37	427.507	101.777	533.82	406.17	286.79	408.927	123.538	-0.127235	0.735334
TKVG1_04440	TKV_RS06230		TIGR00282 family metallophosphoesterase	658	741.73	578.04	855.13	708.225	118.567	778.73	648.58	468.73	632.013	155.663	-0.229409	0.463431
TKVG1_04435	TKV_RS06235		IS200/IS605 family accessory protein TnpB-related protein	751.52	900.89	744.87	1045.72	860.75	142.81	850.41	792.34	615.99	752.913	122.082	-0.252196	0.403093
TKVG1_04430	TKV_RS06240		IS607 family transposase	322.67	334.54	191.53	295.9	286.16	65.1238	340.54	186.09	187.41	238.013	88.7932	-0.329161	0.326978
TKVG1_04425	TKV_RS06245	rny	ribonuclease Y	1531.85	1376.66	1131.47	1429.84	1367.46	169.991	1452.13	1029.15	978.64	1153.31	260.018	-0.317715	0.120399
TKVG1_04420	TKV_RS06250		regulatory protein RecX	135.98	93.43	94.47	87.94	102.955	22.2023	160.66	60.08	121.94	114.227	50.7317	0.043987	0.934078
TKVG1_04415	TKV_RS06255	recA	recombinase RecA	223.57	195.77	182.5	206.01	201.963	17.3244	226.14	134.06	155.19	171.797	48.234	-0.313974	0.211403
TKVG1_04410	TKV_RS06260		competence/damage-inducible protein A	98.15	90.72	54.99	87.09	82.7375	19.0625	110.9	73.87	74.07	86.28	21.3218	-0.00751445	0.98511
TKVG1_04405	TKV_RS06265	pgsA	CDP-diacylglycerol--glycerol-3-phosphate 3-phosphatidyltransferase	99.26	82.11	66.6	72.17	80.035	14.3325	114.81	53.73	88.38	85.64	30.632	0.0116119	0.982679
TKVG1_04400	TKV_RS06270	rimO	30S ribosomal protein S12 methylthiotransferase RimO	129.53	114.56	95.92	111.95	112.99	13.7659	206.72	95.57	164.47	155.587	56.105	0.349841	0.30046
TKVG1_04395	TKV_RS06275		DNA translocase FtsK	137.52	112.97	83.84	102.76	109.273	22.3668	198.6	95.39	200.18	164.723	60.0496	0.481439	0.202126
TKVG1_04390	TKV_RS06280		YlzJ-like family protein	11.79	14.58	4.62	2.86	8.4625	5.61691	47.44	6.39	29.3	27.71	20.5711	1.0221	0.137448
TKVG1_04385	TKV_RS06285		ATP-dependent Clp protease proteolytic subunit	39.04	19.11	15.61	8.95	20.6775	12.9467	57.96	15.94	41.14	38.3467	21.1488	0.627972	0.304376
TKVG1_04380	TKV_RS06290	dapG	aspartate kinase	439.45	369.89	250.58	389.54	362.365	80.0689	437.68	229.61	251.77	306.353	114.271	-0.311167	0.34498
TKVG1_04375	TKV_RS06295		YlmC/YmxH family sporulation protein	375.08	328.67	204.86	367.22	318.957	78.7222	423.4	177.05	288.31	296.253	123.367	-0.178169	0.673136
TKVG1_04370	TKV_RS06300	dut	dUTP diphosphatase	247.62	188.03	141.56	223.49	200.175	46.108	312.02	113.7	159.59	195.103	103.82	-0.130459	0.780275
TKVG1_04365	TKV_RS06305		pitrilysin family protein	281.32	258.69	156.3	261.13	239.36	56.2944	362.96	179.75	258.58	267.097	91.9014	0.0755045	0.844148
TKVG1_04360	TKV_RS06310		polysaccharide deacetylase family protein, CE4 family	60.53	41.21	21.22	36.25	39.8025	16.2228	60.61	48.19	35.55	48.1167	12.5302	0.197459	0.675836
TKVG1_04355	TKV_RS06315		polyribonucleotide nucleotidyltransferase	502.71	379.57	356.53	374.31	403.28	67.0157	344.85	286.42	194.89	275.387	75.5864	-0.596387	0.051372
TKVG1_04350	TKV_RS06320	rpsO	30S ribosomal protein S15	2283.89	1921.45	1449.25	2460.98	2028.89	446.935	1751.5	1276.55	800.43	1276.16	475.535	-0.696805	0.0539871
TKVG1_04345	TKV_RS06325		bifunctional riboflavin kinase/FAD synthetase	524.83	419.2	381.19	436.46	440.42	60.8255	426.46	347.47	205.32	326.417	112.063	-0.48218	0.160182
TKVG1_04340	TKV_RS06330	truB	tRNA pseudouridine(55) synthase TruB	639.88	534.07	502.18	592.55	567.17	61.2378	589.22	447.1	253.46	429.927	168.537	-0.456432	0.212784
TKVG1_04335	TKV_RS06335		bifunctional oligoribonuclease/PAP phosphatase NrnA	616.3	508.56	421.72	550.82	524.35	81.5224	590.39	392.09	316.91	433.13	141.284	-0.34657	0.233638
TKVG1_04330	TKV_RS06340	rbfA	30S ribosome-binding factor RbfA	237.07	244.53	191.06	245.37	229.508	25.9017	244.24	177.05	169.67	196.987	41.0886	-0.288407	0.227876
TKVG1_04325	TKV_RS06345	infB	translation initiation factor IF-2	475.34	422.91	357.19	452.61	427.013	51.2601	662.43	336.91	486.66	495.333	162.933	0.11748	0.712819
TKVG1_04320	TKV_RS06350		ribosomal L7Ae/L30e/S12e/Gadd45 family protein	344.77	264.61	209.79	291.64	277.702	56.2015	679.13	221.06	440.34	446.843	229.104	0.5255	0.218232
TKVG1_04315	TKV_RS06355		YlxR family protein	248.6	143	133.38	211.86	184.21	55.3551	537.33	151.76	415.83	368.307	197.129	0.775623	0.118523
TKVG1_04310	TKV_RS06360	nusA	transcription termination factor NusA	408.94	283.4	203.97	294.53	297.71	84.4081	887.78	234.44	682.16	601.46	334.062	0.795756	0.102077
TKVG1_04305	TKV_RS06365	rimP	ribosome maturation factor RimP	507.51	342.79	237.43	335.04	355.692	111.993	1025.23	282.13	837.44	714.933	386.4	0.792164	0.108324
TKVG1_04300	TKV_RS06370		PolC-type DNA polymerase III	1043.66	1117.03	918.57	923.1	1000.59	96.8595	1153.98	926.06	637.39	905.81	258.89	-0.216781	0.475169
TKVG1_04295	TKV_RS06375		glycosyltransferase family 2 protein, GT2 family	1289.66	1402.27	1208.16	1165.03	1266.28	104.354	1422.65	1083.4	830.29	1112.11	297.222	-0.264181	0.354796
TKVG1_04290	TKV_RS06380	ispG	flavodoxin-dependent (E)-4-hydroxy-3-methylbut-2-enyl-diphosphate synthase	1063.78	1079.03	1011.24	957.36	1027.85	55.2422	1052	904.54	636.81	864.45	210.478	-0.318698	0.279953
TKVG1_04285	TKV_RS12400			1146.25	1208.54	1137.38	1041.4	1133.39	69.0193	1078.5	1050.14	693.35	940.663	214.649	-0.328502	0.301041
TKVG1_04280	TKV_RS06390			2290.06	2415.19	1882.2	2381.77	2242.3	245.829	2128.54	2006.33	1286.99	1807.29	454.715	-0.362687	0.224295
TKVG1_04275	TKV_RS06400	rseP	RIP metalloprotease RseP	165.61	145.43	104.33	151.73	141.775	26.3483	200.31	138.69	114.52	151.173	44.2364	0.0146555	0.97044
TKVG1_04270	TKV_RS06405		1-deoxy-D-xylulose-5-phosphate reductoisomerase	78.84	71.02	45.49	74.39	67.435	14.9764	149.28	74.89	84.78	102.983	40.3979	0.491515	0.144205
TKVG1_04265	TKV_RS06410		phosphatidate cytidylyltransferase	85.7	61.83	36.31	61.44	61.32	20.1673	110.69	48.17	67.42	75.4267	32.0198	0.194831	0.664813
TKVG1_04260	TKV_RS06415		isoprenyl transferase	186.81	129.83	83.51	152.63	138.195	43.329	240.25	126.58	115.62	160.817	69.0092	0.122695	0.784829
TKVG1_04255	TKV_RS06420		hypothetical protein	144.05	143.89	57.48	138.73	121.037	42.4437	170.42	68.74	83.25	107.47	54.9969	-0.226387	0.662975
TKVG1_04250	TKV_RS06425	frr	ribosome recycling factor	397.56	295.43	200.62	322.37	303.995	81.3466	353.54	256.89	196.89	269.107	79.0363	-0.230328	0.514431
TKVG1_04245	TKV_RS06430	pyrH	UMP kinase	360.52	286.81	181.87	333.2	290.6	78.6133	360.85	218.46	198.4	259.237	88.5695	-0.226241	0.533676
TKVG1_04240	TKV_RS06435	tsf	translation elongation factor Ts	1059.75	831.7	560.5	1041.56	873.377	232.844	973.57	503.21	433.01	636.597	293.931	-0.505342	0.195145
TKVG1_04235	TKV_RS06440	rpsB	30S ribosomal protein S2	1142.5	930.04	624.71	1098.68	948.983	234.783	1023.52	569.78	482.06	691.787	290.618	-0.507025	0.160942
TKVG1_04230	TKV_RS06445		hypothetical protein	56.02	70.66	50.98	47.87	56.3825	10.0934	102.07	108.75	141.65	117.49	21.1881	0.929082	0.0142801
TKVG1_04225	TKV_RS06450		FapA family protein	73.19	73.91	39.24	70.1	64.11	16.6622	90.01	144.76	136.71	123.827	29.5614	0.85425	0.0358995
TKVG1_04220	TKV_RS06455		FliA/WhiG family RNA polymerase sigma factor	71.15	84.3	48.05	57.98	65.37	15.7728	108.14	109.56	107.73	108.477	0.96033	0.653597	0.0317278
TKVG1_04215	TKV_RS06460		chemotaxis protein CheD	64.03	72.95	44.02	45.77	56.6925	14.119	55.51	113.2	97.35	88.6867	29.8048	0.553763	0.2426
TKVG1_04210	TKV_RS06465		chemotaxis protein CheC	61.74	58.71	41.64	52.02	53.5275	8.90484	72.66	99.07	107.85	93.1933	18.3163	0.713863	0.0526064
TKVG1_04205	TKV_RS06470		chemotaxis protein CheW	73.16	82.3	47.11	82.17	71.185	16.6104	118.96	103.95	134.79	119.233	15.4218	0.653221	0.0491236
TKVG1_04200	TKV_RS06475		chemotaxis protein CheA	80.64	90.43	52.31	76.94	75.08	16.2118	104.96	156.94	142.62	134.84	26.8491	0.766454	0.0363534
TKVG1_04195	TKV_RS06480		CheB methylesterase domain-containing protein	79.83	80.49	43.93	75.37	69.905	17.4653	109.9	118.16	151.01	126.357	21.7462	0.76563	0.0346618
TKVG1_04190	TKV_RS06485		flagellar brake protein	89.47	86.03	53.43	76.78	76.4275	16.2411	79.52	153.62	144.62	125.92	40.4348	0.638958	0.147926
TKVG1_04185	TKV_RS06490		AAA family ATPase	97.61	105.29	81.39	92.42	94.1775	10.0313	94.23	181.86	170.81	148.967	47.7242	0.580456	0.178307
TKVG1_04180	TKV_RS06495		AAA family ATPase	83.04	130.71	89.91	103.81	101.867	21.0802	115.81	221.2	209.44	182.15	57.7522	0.727936	0.103773
TKVG1_04175	TKV_RS06500	flhA	flagellar biosynthesis protein FlhA	68.64	82.61	56.99	65.16	68.35	10.6873	76.9	160.85	135.25	124.333	43.0265	0.76179	0.0822081
TKVG1_04170	TKV_RS06505	flhB	flagellar biosynthesis protein FlhB	85.62	110.2	81.96	80.75	89.6325	13.8671	115.03	181.71	184.17	160.303	39.2271	0.740535	0.0591425
TKVG1_04165	TKV_RS06510	fliR	flagellar biosynthetic protein FliR	73.47	97.96	67.79	69.26	77.12	14.1003	92.93	141.6	145.17	126.567	29.1848	0.625964	0.118305
TKVG1_04160	TKV_RS06515	fliQ	flagellar biosynthesis protein FliQ	105.72	117.94	79.72	69.55	93.2325	22.434	68.45	151.58	122.61	114.213	42.1963	0.238941	0.654675
TKVG1_04155	TKV_RS13195			129.46	156.88	103.89	97.37	121.9	27.1222	98.93	188.44	172.7	153.357	47.7874	0.275687	0.576776
TKVG1_04150	TKV_RS06520	fliM		114.92	162.07	102.62	116.19	123.95	26.1398	123.89	251.6	210.18	195.223	65.1555	0.571559	0.204871
TKVG1_04145	TKV_RS06525		flagellar basal body-associated FliL family protein	208.11	210.51	121.77	195.88	184.067	42.0229	170.21	322.73	253.47	248.803	76.367	0.384582	0.383296
TKVG1_04140	TKV_RS06530		flagellar FlbD family protein	189.04	222.69	138.95	148.71	174.848	38.5665	193.97	289.73	247.83	243.843	48.0043	0.414293	0.304376
TKVG1_04135	TKV_RS06535	flgF	flagellar basal-body rod protein FlgF	235.53	232.57	187.78	226.18	220.515	22.1694	233.15	388.31	306.51	309.323	77.6182	0.427755	0.260535
TKVG1_04130	TKV_RS06540		TIGR02530 family flagellar biosynthesis protein	136.17	154.34	100	111.96	125.617	24.3524	119.73	231.38	128.22	159.777	62.1554	0.292722	0.532003
TKVG1_04125	TKV_RS06545		flagellar hook capping FlgD N-terminal domain-containing protein	185.29	210.75	163.07	185.01	186.03	19.4921	176.71	368.76	256.06	267.177	96.5064	0.451321	0.316252
TKVG1_04120	TKV_RS06550		flagellar hook-length control protein FliK	262.11	287.71	196.12	252.87	249.702	38.6421	245.75	480.04	299.21	341.667	122.78	0.396049	0.361051
TKVG1_04115	TKV_RS06555		MgtE integral membrane protein	195.95	188.26	147.3	174.87	176.595	21.3843	222.43	329.39	229.97	260.597	59.6959	0.492492	0.160987
TKVG1_04110	TKV_RS06560	fliJ	flagellar export protein FliJ	97.42	126.2	60.87	94.4	94.7225	26.7345	122.27	189.65	170.89	160.937	34.7752	0.677353	0.0997396
TKVG1_04105	TKV_RS06565	fliI	flagellar protein export ATPase FliI	161.16	183.86	124.76	164.74	158.63	24.6811	167.68	260.54	203.89	210.703	46.8034	0.356827	0.341545
TKVG1_04100	TKV_RS06570		FliH/SctL family protein	119.85	135.95	98.62	121.47	118.972	15.3782	150.77	188.92	155.06	164.917	20.8979	0.407185	0.188234
TKVG1_04095	TKV_RS06575	fliG	flagellar motor switch protein FliG	146.51	169.96	113.67	177.05	151.798	28.5729	196.66	248.11	181.79	208.853	34.8008	0.396417	0.238331
TKVG1_04090	TKV_RS06580	fliF	flagellar basal-body MS-ring/collar protein FliF	217.11	227.11	137.65	200.3	195.543	40.1491	200.62	299.53	216.52	238.89	53.1141	0.248469	0.512616
TKVG1_04085	TKV_RS06585	fliE	flagellar hook-basal body complex protein FliE	218.71	240.73	137.86	232.17	207.367	47.2164	194.45	297.63	200.24	230.773	57.9719	0.117575	0.792634
TKVG1_04080	TKV_RS06590	flgC	flagellar basal body rod protein FlgC	186.64	226.54	146.16	206.39	191.432	34.2969	158.04	273.52	208.5	213.353	57.8928	0.121436	0.789797
TKVG1_04075	TKV_RS06595	flgB	flagellar basal body rod protein FlgB	184.91	176.74	136.05	213.55	177.812	32.0042	169.51	285.73	167.66	207.633	67.64	0.177827	0.69773
TKVG1_04070	TKV_RS06600	codY	GTP-sensing pleiotropic transcriptional regulator CodY	432.86	387.11	309.27	439.9	392.285	60.0882	451.93	276	265.34	331.09	104.786	-0.319571	0.247512
TKVG1_04065	TKV_RS06605	hslU	ATP-dependent protease ATPase subunit HslU	423.63	378.08	294	411.59	376.825	58.4832	459.51	268.99	361.63	363.377	95.272	-0.127073	0.651481
TKVG1_04060	TKV_RS06610	hslV	ATP-dependent protease subunit HslV	384.54	325.51	253.88	338.92	325.712	54.1451	386.1	210.7	285.79	294.197	88.0017	-0.219806	0.444776
TKVG1_04055	TKV_RS06615	topA	type I DNA topoisomerase	133.47	108.61	60.86	107.37	102.578	30.2988	143.9	73.8	75.28	97.66	40.0519	-0.140976	0.738558
TKVG1_04050	TKV_RS06620	dprA	DNA-processing protein DprA	9.9	16.03	32.4	8.28	16.6525	11.0161	10.61	13.4	14.66	12.89	2.07261	-0.357033	0.587934
TKVG1_04045	TKV_RS06625		ribonuclease HII	86.91	86.31	74.37	74.6	80.5475	7.00529	76.25	79.38	69.32	74.9833	5.14823	-0.157618	0.595915
TKVG1_04040	TKV_RS06630		YraN family protein	281.1	320.19	354.12	272.59	307	37.6348	245.29	241.68	165.77	217.58	44.9051	-0.544016	0.127516
TKVG1_04035	TKV_RS06635	trpS	tryptophan--tRNA ligase	293.81	285.12	360.79	260.02	299.935	43.0253	243.43	203.47	146.48	197.793	48.7236	-0.654194	0.0687156
TKVG1_04030	TKV_RS06640		YitT family protein	66.19	83.7	134.96	47.48	83.0825	37.6145	51.12	58.23	64.54	57.9633	6.71397	-0.516293	0.345319
TKVG1_04025	TKV_RS06645		YifB family Mg chelatase-like AAA ATPase	91.59	91.9	149.51	73.94	101.735	32.9376	74.82	72.29	73.43	73.5133	1.26706	-0.508428	0.267838
TKVG1_04020	TKV_RS06650	ylqF	ribosome biogenesis GTPase YlqF	120.32	89.77	156.01	88.44	113.635	31.8573	97.47	75.62	81.14	84.7433	11.3619	-0.480872	0.263169
TKVG1_04015	TKV_RS06655	rplS	50S ribosomal protein L19	1966.79	1588.21	1703.26	2002.12	1815.1	201.638	1609.12	1203.32	737.07	1183.17	436.374	-0.665695	0.0591425
TKVG1_04010	TKV_RS06660	trmD	tRNA (guanosine(37)-N1)-methyltransferase TrmD	2198.86	1883.55	1877.83	2071.9	2008.03	155.93	1674.5	1493.22	916	1361.24	396.099	-0.607211	0.0561837
TKVG1_04005	TKV_RS06665	rimM	ribosome maturation factor RimM	2655.35	2304.34	2301.02	2476.32	2434.26	168.604	2112.72	1687.01	1086.97	1628.9	515.338	-0.633244	0.0437431
TKVG1_04000	TKV_RS06670		KH domain-containing protein	3585.45	3041.11	3009.57	3612.64	3312.19	331.665	3047.83	2365.96	1340.16	2251.32	859.588	-0.604109	0.0949846
TKVG1_03995	TKV_RS06675	rpsP	30S ribosomal protein S16	2406.15	2010.2	1917.23	2227.47	2140.26	219.819	1822.19	1509.62	952.96	1428.26	440.29	-0.631015	0.0441818
TKVG1_03990	TKV_RS06680	ffh	signal recognition particle protein	661.85	564.55	483.82	693.54	600.94	95.4395	596.58	457.68	371.93	475.397	113.368	-0.400243	0.131176
TKVG1_03985	TKV_RS06685		putative DNA-binding protein	271.53	227.05	175.55	208.36	220.623	40.0616	244.71	124.62	148.55	172.627	63.5623	-0.418915	0.186616
TKVG1_03980	TKV_RS06690	ftsY	signal recognition particle-docking protein FtsY	144.88	131.02	103.66	156.03	133.897	22.6057	191.45	104.11	131.63	142.397	44.6543	0.0015729	0.997984
TKVG1_03975	TKV_RS06695	smc	chromosome segregation protein SMC	144.38	119.12	80.31	119.31	115.78	26.4556	194	91.93	130.49	138.807	51.5407	0.167432	0.646972
TKVG1_03970	TKV_RS06700		hypothetical protein	107.67	109.26	64.32	109.78	97.7575	22.3097	193.74	102.51	138.34	144.863	45.9635	0.454977	0.199248
TKVG1_03965	TKV_RS06705		stage V sporulation protein S	1810.19	2130.45	1139.05	2519.86	1899.89	584.364	1899.08	1947.28	1526.53	1790.96	230.271	-0.11942	0.772896
TKVG1_03960	TKV_RS06710		radical SAM protein	1303.09	1324.1	689.4	1448.64	1191.31	340.715	1242.6	965.51	660.68	956.263	291.07	-0.351768	0.359379
TKVG1_03955	TKV_RS06715	rnc	ribonuclease III	1322.17	1312.79	647.34	1262.41	1136.18	326.946	1130.69	828.04	618.34	859.023	257.576	-0.433805	0.233556
TKVG1_03950	TKV_RS06720	fabF	beta-ketoacyl-ACP synthase II	1361.09	1392.56	683.26	1538.03	1243.73	381.516	1330.3	973.96	729.18	1011.15	302.28	-0.334205	0.387268
TKVG1_03945	TKV_RS06725	acpP	acyl carrier protein	1941.24	2105.75	980.24	2288.95	1829.04	583.42	1848.46	1294.8	898.79	1347.35	477.011	-0.463704	0.263039
TKVG1_03940	TKV_RS06730	fabG	3-oxoacyl-[acyl-carrier-protein] reductase	1151.03	1105.63	503.34	1233.3	998.325	334.194	1094.7	611.88	521.14	742.573	308.307	-0.45584	0.286001
TKVG1_03935	TKV_RS06735	fabD	ACP S-malonyltransferase	1018.7	899.65	468.63	1116.02	875.75	285.472	996.85	553.89	454.09	668.277	288.895	-0.427432	0.320412
TKVG1_03930	TKV_RS06740	fabK	enoyl-[acyl-carrier-protein] reductase FabK	394.72	399.48	198.94	419.1	353.06	103.287	461.35	204.06	225.47	296.96	142.768	-0.310613	0.461785
TKVG1_03925	TKV_RS06745		beta-ketoacyl-ACP synthase III	1034.4	988.98	515.73	1188.68	931.947	290.343	1147.08	675.66	599.45	807.397	296.632	-0.260887	0.519872
TKVG1_03920	TKV_RS06750	plsX	phosphate acyltransferase PlsX	1227.96	1105.85	559.22	1266.76	1039.95	327.737	1086.98	761.78	621.4	823.387	238.826	-0.369386	0.342123
TKVG1_03915	TKV_RS06755	fapR	transcription factor FapR	887.61	842.16	446.59	945.69	780.513	226.611	691.98	515.17	354.9	520.683	168.608	-0.599748	0.11471
TKVG1_03910	TKV_RS06760	rpmF	50S ribosomal protein L32	2823.01	2356.83	1974.39	2263.39	2354.41	352.274	1625.89	1778.93	1079.88	1494.9	367.473	-0.672846	0.0346618
TKVG1_03905	TKV_RS06765		DUF177 domain-containing protein	3860.69	3503.26	3151.47	3239.41	3438.71	318.57	2815.43	3290.18	2147.46	2751.02	574.076	-0.359387	0.2521
TKVG1_03900	TKV_RS06770		acetate kinase	5102.5	4879.2	4619.74	4207.16	4702.15	384.462	3056.25	4664.7	2559.58	3426.84	1100.4	-0.461283	0.2426
TKVG1_03895	TKV_RS06775	pta	phosphate acetyltransferase	2550.63	2470.42	2553.9	2191.91	2441.72	170.953	1044.5	2528.07	783.89	1452.15	940.838	-0.649896	0.22605
TKVG1_03890	TKV_RS06780		nucleotidyltransferase	172.28	177.02	142.33	159.34	162.743	15.5248	210.27	162.44	154.88	175.863	30.0359	0.0363221	0.877098
TKVG1_03885	TKV_RS06785	ylbJ	sporulation integral membrane protein YlbJ	466.37	428.85	270	412.29	394.377	85.9494	450.86	367.83	272.76	363.817	89.1178	-0.170662	0.588622
TKVG1_03880	TKV_RS06790		ATPase	765.16	751.98	486.2	751.77	688.777	135.197	779.04	602.77	407.31	596.373	185.948	-0.264355	0.425603
TKVG1_03875	TKV_RS06795	coaD	pantetheine-phosphate adenylyltransferase	481.83	490.55	324.68	531.11	457.043	90.8167	474.95	405.71	271.29	383.983	103.554	-0.3004	0.36136
TKVG1_03870	TKV_RS06800	rsmD	16S rRNA (guanine(966)-N(2))-methyltransferase RsmD	436.4	425.91	303.55	499.67	416.382	81.9745	469.3	310.08	172.87	317.417	148.351	-0.441487	0.286001
TKVG1_03865	TKV_RS06805		alpha/beta-type small acid-soluble spore protein	265.73	428.4	168.93	229.29	273.087	110.97	265.97	533.37	382.9	394.08	134.05	0.461151	0.361347
TKVG1_03860	TKV_RS06810		alpha/beta-type small acid-soluble spore protein	742.9	1152.92	480.54	577.84	738.55	296.714	645.92	1176.36	725.97	849.417	285.956	0.172319	0.750148
TKVG1_03855	TKV_RS06815		DegV family protein	215.96	195.41	156.65	209.57	194.397	26.5898	201.93	143.86	114.51	153.433	44.4893	-0.405177	0.13913
TKVG1_03850	TKV_RS06820	recG	ATP-dependent DNA helicase RecG	383.05	348.26	287.97	385.79	351.267	45.5249	391.99	241.82	223.9	285.903	92.3096	-0.373679	0.160637
TKVG1_03845	TKV_RS06825		DAK2 domain-containing protein	416.56	376.79	322.85	391.95	377.038	39.6684	366.48	277.76	207.35	283.863	79.7404	-0.473827	0.0766732
TKVG1_03840	TKV_RS06830		Asp23/Gls24 family envelope stress response protein	241.49	258.65	222.7	245.67	242.127	14.8703	243.1	179.21	164.01	195.44	41.9686	-0.377412	0.126235
TKVG1_03835	TKV_RS06835	rpmB	50S ribosomal protein L28	296.68	263.26	166.97	342.58	267.373	74.4148	329.25	131.35	232.51	231.037	98.9582	-0.271392	0.538103
TKVG1_03830	TKV_RS06840		hypothetical protein	127.63	96.3	72.22	114.69	102.71	24.0503	124.98	89.28	122.07	112.11	19.8248	0.0628351	0.884205
TKVG1_03825	TKV_RS06845		thiamine diphosphokinase	139	125.41	100.51	116.68	120.4	16.1298	113.05	66.46	103.87	94.46	24.6793	-0.405841	0.164934
TKVG1_03820	TKV_RS06850	rpe	ribulose-phosphate 3-epimerase	144.75	157.56	120.32	93.23	128.965	28.3935	107.34	89.92	69.53	88.93	18.9244	-0.571803	0.0908049
TKVG1_03815	TKV_RS06855	rsgA	ribosome small subunit-dependent GTPase A	187.58	173.06	140.18	158.91	164.933	20.2313	154.53	116.39	99.81	123.577	28.059	-0.479453	0.0400249
TKVG1_03810	TKV_RS06860	pknB	Stk1 family PASTA domain-containing Ser/Thr kinase	306.61	279.9	236.09	248.86	267.865	31.7115	285.62	193.95	160.81	213.46	64.6519	-0.399935	0.134075
TKVG1_03805	TKV_RS06865		Stp1/IreP family PP2C-type Ser/Thr phosphatase	233.34	183.55	199.25	181.72	199.465	23.9147	206.67	145.64	127.19	159.833	41.5975	-0.392943	0.182453
TKVG1_03800	TKV_RS06870	rlmN	23S rRNA (adenine(2503)-C(2))-methyltransferase RlmN	329.36	284.47	225.85	271.25	277.733	42.6013	274.59	194.63	169.4	212.873	54.9167	-0.44761	0.0672122
TKVG1_03795	TKV_RS06875	rsmB	16S rRNA (cytosine(967)-C(5))-methyltransferase RsmB	319.86	278.78	249.24	260.28	277.04	31.0393	278.27	182.31	159.98	206.853	62.8483	-0.493385	0.0593589
TKVG1_03790	TKV_RS06880		zinc metallopeptidase	562.34	512.34	418.08	533.91	506.668	62.5073	560.43	354.35	283.54	399.44	143.847	-0.415648	0.160637
TKVG1_03785	TKV_RS06885		DUF116 domain-containing protein	264.4	206.97	159.04	217.46	211.968	43.2267	272.46	131.2	152.12	185.26	76.2384	-0.270838	0.432732
TKVG1_03780	TKV_RS06890	fmt	methionyl-tRNA formyltransferase	342.02	236.06	187.59	246.82	253.123	64.6223	281.31	145.55	154.67	193.843	75.8855	-0.444997	0.198288
TKVG1_03775	TKV_RS06895	def	peptide deformylase	388.07	320.55	257.25	341.76	326.908	54.3263	334.78	175.42	191.34	233.847	87.7725	-0.548248	0.069265
TKVG1_03770	TKV_RS06900	priA	primosomal protein N'	139.28	105.41	71.98	112.24	107.228	27.6778	128.43	82.15	52.82	87.8	38.1203	-0.340939	0.393033
TKVG1_03765	TKV_RS06905	coaBC	bifunctional phosphopantothenoylcysteine decarboxylase/phosphopantothenate--cysteine ligase CoaBC	238.24	229.01	170.74	254.26	223.062	36.4081	262.05	170.39	143.92	192.12	61.9905	-0.287725	0.335722
TKVG1_03760	TKV_RS06910	rpoZ		445.13	390.29	329.75	447.85	403.255	55.7175	474.49	304.76	268.2	349.15	110.076	-0.282939	0.345837
TKVG1_03755	TKV_RS06915	gmk	guanylate kinase	318.72	241.35	213.44	313.51	271.755	52.5176	290.62	186.37	188.47	221.82	59.5918	-0.360007	0.211403
TKVG1_03750	TKV_RS06920		DUF370 domain-containing protein	153.65	115.22	109.56	111.51	122.485	20.9089	119.08	79.54	92.62	97.08	20.1438	-0.395602	0.206918
TKVG1_03745	TKV_RS06925		YicC/YloC family endoribonuclease	185.51	156.25	142.93	178.45	165.785	19.6871	195.98	98.37	97.99	130.78	56.4652	-0.422957	0.206918
TKVG1_03740	TKV_RS06930	dapF	diaminopimelate epimerase	113.34	105.96	107.11	117.45	110.965	5.40392	88.03	71.36	35.69	65.0267	26.7386	-0.79056	0.0435102
TKVG1_03735	TKV_RS06935		MFS transporter	44.17	38.17	36.2	36	38.635	3.81772	63.19	24.62	30.18	39.33	20.8495	-0.0850492	0.852867
TKVG1_03730	TKV_RS06940		Chromate resistance protein ChrB	57.93	48.71	37.7	44.38	47.18	8.47769	72.19	34.63	55.76	54.1933	18.8289	0.114198	0.780275
TKVG1_03725	TKV_RS06945		NFACT RNA binding domain-containing protein	136.03	119.94	104.02	110.15	117.535	13.9647	155.76	106.05	139.72	133.843	25.3707	0.110534	0.668079
TKVG1_03720	TKV_RS06950	thpR	RNA 2',3'-cyclic phosphodiesterase	74.54	75.01	56.6	72.24	69.5975	8.74912	123.08	54.38	97.65	91.7033	34.7339	0.28731	0.43744
TKVG1_03715	TKV_RS06955		GNAT family protein	90.2	90.51	50.82	49.55	70.27	23.1983	169.2	54.44	117.7	113.78	57.4803	0.52703	0.273895
TKVG1_03695	TKV_RS13005		hypothetical protein	104.17	75.49	61.81	108.5	87.4925	22.5322	197.52	31.45	91.55	106.84	84.0842	0.123263	0.852867
TKVG1_03690	TKV_RS06975		tRNA 2-thiocytidine biosynthesis TtcA family protein	70.15	48.65	25.83	50.92	48.8875	18.1469	134.18	23.69	74.48	77.45	55.3048	0.44451	0.447459
TKVG1_03685	TKV_RS06980		class I SAM-dependent rRNA methyltransferase	216.73	212.98	150.83	226.49	201.757	34.4259	266.05	143.92	173.26	194.41	63.7529	-0.133452	0.667155
TKVG1_03680	TKV_RS06985		peptidoglycan-binding domain-containing protein	423.23	295.07	365.17	452.6	384.018	69.5415	381.31	270.96	270.42	307.563	63.8671	-0.387857	0.23464
TKVG1_03675	TKV_RS06990	pyrE	orotate phosphoribosyltransferase	443.79	225.24	345.98	477.42	373.108	113.252	320.26	192.03	186.61	232.967	75.6468	-0.709566	0.0857955
TKVG1_03670	TKV_RS06995		dihydroorotate dehydrogenase	277.66	118.91	188.19	244.76	207.38	69.5982	184.88	85.07	82.02	117.323	58.5257	-0.826819	0.0740621
TKVG1_03665	TKV_RS07000		dihydroorotate dehydrogenase electron transfer subunit	555.11	232.57	374.96	528.66	422.825	149.653	287.97	151.01	118.66	185.88	89.88	-1.13436	0.0142829
TKVG1_03660	TKV_RS07005	pyrF	orotidine-5'-phosphate decarboxylase	568.85	272.72	480.08	518.8	460.113	130.106	243.45	135.06	78.15	152.22	83.9754	-1.48758	0.00138963
TKVG1_03655	TKV_RS07010		dihydroorotase	381.18	154.51	295.82	325.37	289.22	96.5295	140.82	34.04	5.99	60.2833	71.1429	-1.57901	0.0165883
TKVG1_03650	TKV_RS07015		aspartate carbamoyltransferase catalytic subunit	212.97	100.39	208.35	202.6	181.078	53.9587	71.8	16.68	4.64	31.04	35.8088	-1.8601	0.00334477
TKVG1_03645	TKV_RS07020	pyrR	bifunctional pyr operon transcriptional regulator/uracil phosphoribosyltransferase PyrR	1327.86	882.09	1478.52	1333.28	1255.44	258.495	859.83	324.85	335.51	506.73	305.84	-1.28472	0.00390803
TKVG1_03640	TKV_RS07025		AIR synthase family protein	142.72	108.52	87.74	120.36	114.835	22.9646	116.55	89.26	98.83	101.547	13.8463	-0.233306	0.372381
TKVG1_03635	TKV_RS07030		RluA family pseudouridine synthase	120.74	87.82	60.25	102.1	92.7275	25.5043	119.85	78.06	78.63	92.18	23.9646	-0.0729498	0.846952
TKVG1_03630	TKV_RS07035	lspA	signal peptidase II	50.89	79.54	63.99	69.07	65.8725	11.903	88.62	66.32	49.16	68.0333	19.7857	-0.0389515	0.935009
TKVG1_03625	TKV_RS07040		GNAT family protein	40.72	31.83	30.74	42.54	36.4575	6.03515	50.46	31.26	46.46	42.7267	10.1298	0.15004	0.705187
TKVG1_03620	TKV_RS07045		SprT family zinc-dependent metalloprotease	58.04	71.22	39.08	52.75	55.2725	13.2984	78.93	59.89	54.25	64.3567	12.9321	0.145065	0.669329
TKVG1_03615	TKV_RS07050		DUF2357 domain-containing protein	48.9	46.58	34.85	45.46	43.9475	6.23189	63.76	47.78	40.6	50.7133	11.8554	0.127016	0.636031
TKVG1_03610	TKV_RS07055		DUF3578 domain-containing protein	86.14	77.46	73.03	78.58	78.8025	5.44709	100.12	91.18	59.43	83.5767	21.384	0.00813696	0.984991
TKVG1_03605	TKV_RS07060		DEAD/DEAH box helicase family protein	111.22	107.51	84.34	96.99	100.015	12.0635	103.3	95.83	67.25	88.7933	19.0273	-0.229125	0.403093
TKVG1_03600	TKV_RS07065		site-specific DNA-methyltransferase	127.97	114.52	113.43	111.6	116.88	7.49085	139.52	98.69	81.1	106.437	29.9705	-0.218935	0.4434
TKVG1_03595	TKV_RS07070		DUF4391 domain-containing protein	79.04	79.5	56.17	68.49	70.8	10.9994	84.12	60.99	56.9	67.3367	14.678	-0.141162	0.621313
TKVG1_03590	TKV_RS07075		helicase-related protein	71.25	60.86	46.58	64.09	60.695	10.3633	89.77	57.4	59.53	68.9	18.1053	0.1006	0.717226
TKVG1_03585	TKV_RS07085		winged helix-turn-helix domain-containing protein	109.73	62.22	88.68	64.48	81.2775	22.4328	133.83	79.66	119.06	110.85	28.0027	0.323089	0.461785
TKVG1_03580	TKV_RS13525		hypothetical protein	153.44	90.22	86.7	98.36	107.18	31.2242	184.77	75.88	88.93	116.527	59.4596	0.0144308	0.983042
TKVG1_03575	TKV_RS12415		transposase	255.98	176.29	152.03	161.61	186.477	47.3969	194.7	155.03	177.55	175.76	19.8955	-0.138399	0.723333
TKVG1_03570	TKV_RS07095		type II toxin-antitoxin system PemK/MazF family toxin	265.6	270.34	163.17	216.44	228.887	50.1326	192.91	188.07	171.5	184.16	11.2278	-0.346273	0.225026
TKVG1_03565	TKV_RS07100		DUF2281 domain-containing protein	348.86	324.59	273.49	283.56	307.625	35.2726	298.28	255.5	221.99	258.59	38.2388	-0.309553	0.212151
TKVG1_03560	TKV_RS07105		hypothetical protein	22.3	11.57	21.33	13.39	17.1475	5.45493	19.31	36.73	20.44	25.4933	9.74763	0.427676	0.446482
TKVG1_03555	TKV_RS07110		RAMP superfamily CRISPR-associated protein	7.93	17.18	9.91	10.22	11.31	4.04266	18.17	27.58	23.58	23.11	4.72257	0.863426	0.0740557
TKVG1_03550	TKV_RS07115		hypothetical protein	3.24	11.91	10.79	15.02	10.24	4.99799	15.64	23.76	16.68	18.6933	4.41857	0.637751	0.313229
TKVG1_03545	TKV_RS07120		RAMP superfamily CRISPR-associated protein	10.24	17.22	10.44	6.83	11.1825	4.3526	10.39	30.38	23.87	21.5467	10.1955	0.758811	0.186616
TKVG1_03540	TKV_RS07125		CRISPR-associated protein Csx11	6.66	9.73	10.77	3.97	7.7825	3.08291	14.46	22.77	17.32	18.1833	4.22173	0.977176	0.0591425
TKVG1_03535	TKV_RS07130		RAMP superfamily CRISPR-associated protein	6.44	15.41	10.25	3.67	8.9425	5.08592	20.26	23.54	19.55	21.1167	2.12848	0.957977	0.0838101
TKVG1_03530	TKV_RS07135		RAMP superfamily CRISPR-associated protein	8.8	12.9	9.34	6.88	9.48	2.51253	40.33	15.51	41.45	32.43	14.6638	1.45132	0.00250407
TKVG1_03525	TKV_RS07140			304.39	289.91	290.3	245.87	282.617	25.4075	431.96	192.72	287.92	304.2	120.448	-0.00586626	0.990532
TKVG1_03520	TKV_RS07145			443.15	469.85	430.15	368.92	428.018	42.724	495.58	315.26	323.71	378.183	101.756	-0.264692	0.347182
TKVG1_03515	TKV_RS07150		IS607 family transposase	334.41	347.12	306.42	270.71	314.665	33.8783	353.26	211.73	208.19	257.727	82.7532	-0.370204	0.209319
TKVG1_03510	TKV_RS07155		NifB/NifX family molybdenum-iron cluster-bindingprotein	51.4	100.35	148.69	46.29	86.6825	47.9866	41.25	88.33	55.8	61.7933	24.1054	-0.4349	0.491305
TKVG1_03505	TKV_RS07160	mscL	large conductance mechanosensitive channel protein MscL	69.81	86.04	67.77	87.73	77.8375	10.503	68.41	170.97	112.99	117.457	51.4257	0.499349	0.326915
TKVG1_03500	TKV_RS13955			30.4	50.16	45.96	66.88	48.35	14.995	47.3	109.46	85.72	80.8267	31.3676	0.598706	0.265494
TKVG1_03495	TKV_RS07170		nitroreductase family protein	57.73	86.07	68.52	84.72	74.26	13.6024	65.04	161.99	130.64	119.223	49.473	0.569685	0.267748
TKVG1_03490	TKV_RS13960		GGDEF domain-containing protein	33.18	37.14	27.31	25.67	30.825	5.30266	42.95	29.73	40.17	37.6167	6.97006	0.207117	0.535857
TKVG1_03485	TKV_RS07180			28.31	34.55	34.5	26.84	31.05	4.05727	59.29	36.28	58.78	51.45	13.1401	0.593877	0.121908
TKVG1_03480	TKV_RS07185		stalk domain-containing protein	61.14	62.83	65.14	63.54	63.1625	1.65872	64.47	57.76	54.35	58.86	5.14889	-0.172519	0.550575
TKVG1_03470	TKV_RS07195			550.73	625.77	401.49	476.12	513.528	96.4955	531.76	540.79	280.15	450.9	147.943	-0.230084	0.562616
TKVG1_03465	TKV_RS07200		secondary thiamine-phosphate synthase enzyme YjbQ	232.61	267.28	244.5	241.73	246.53	14.7365	247.21	277.15	229.03	251.13	24.2983	-0.0345466	0.929183
TKVG1_03460	TKV_RS07205		TraR/DksA C4-type zinc finger protein	148.46	203.88	290.84	163.77	201.738	63.8328	244.82	249.04	340.37	278.077	53.9889	0.326272	0.507083
TKVG1_03455	TKV_RS07210		DUF5665 domain-containing protein	63.95	86.85	240.68	66.45	114.483	84.7546	172.61	112.36	223.01	169.327	55.398	0.308955	0.6514
TKVG1_03450	TKV_RS07215	bcp	thioredoxin-dependent thiol peroxidase	372.93	443.71	845.26	458.48	530.095	213.402	764.41	646.26	1113.82	841.497	243.125	0.471942	0.371599
TKVG1_03445	TKV_RS07220	aroF	3-deoxy-7-phosphoheptulonate synthase	102.39	76.16	50.29	160.2	97.26	47.0431	91.01	69.36	24.23	61.5333	34.071	-0.601171	0.2961
TKVG1_03440	TKV_RS07225	trpA	tryptophan synthase subunit alpha	59.44	34.34	18.87	130.42	60.7675	49.3526	48.49	28.27	6.13	27.63	21.1873	-0.821003	0.228325
TKVG1_03435	TKV_RS07230	trpB	tryptophan synthase subunit beta	36.66	17.57	15.55	58.89	32.1675	20.1949	23.7	14.69	6.98	15.1233	8.36842	-0.913224	0.124518
TKVG1_03430	TKV_RS07235		phosphoribosylanthranilate isomerase	74.96	33.52	24.86	116.35	62.4225	42.0779	58.04	42.21	9.81	36.6867	24.5848	-0.606029	0.361967
TKVG1_03425	TKV_RS07240	trpC	indole-3-glycerol phosphate synthase TrpC	86.31	46.34	18.4	139.67	72.68	52.642	70.44	31.28	28.06	43.26	23.5936	-0.624226	0.332277
TKVG1_03420	TKV_RS07245	trpD	anthranilate phosphoribosyltransferase	76.9	31.46	23.39	117.43	62.295	43.6561	61.05	29.69	20.45	37.0633	21.2806	-0.645281	0.304258
TKVG1_03415	TKV_RS07250		aminodeoxychorismate/anthranilate synthase component II	75.79	37.75	26.15	136.68	69.0925	49.7974	67.03	32.52	26.9	42.15	21.7292	-0.619663	0.320274
TKVG1_03410	TKV_RS07255	trpE	anthranilate synthase component I	80.57	48.78	28.45	136.23	73.5075	46.9951	71.38	39.47	32.11	47.6533	20.8748	-0.571099	0.326978
TKVG1_03405	TKV_RS13965			523.09	418.46	559.68	371.81	468.26	87.8381	406.67	355.04	388.17	383.293	26.1582	-0.34907	0.357811
TKVG1_03400	TKV_RS07265		5'-methylthioadenosine/adenosylhomocysteine nucleosidase	255.5	249.66	366.46	247.35	279.742	57.9133	243.95	226.54	216.77	229.087	13.7678	-0.355343	0.364692
TKVG1_03395	TKV_RS07270	ileS	isoleucine--tRNA ligase	458.2	375.38	491.64	380.15	426.342	57.7627	429.07	343.74	378.58	383.797	42.9035	-0.229764	0.479566
TKVG1_03390	TKV_RS07275		TM1266 family iron-only hydrogenase system putative regulator	425.08	385.85	309.86	409.76	382.637	51.1334	481.86	334.79	328.09	381.58	86.9096	-0.0780961	0.772732
TKVG1_03385	TKV_RS07280		DivIVA domain-containing protein	323.65	268.71	187.14	253.47	258.242	56.1725	346.69	210.53	238.71	265.31	71.8718	-0.0340553	0.925037
TKVG1_03380	TKV_RS07285		YlmH/Sll1252 family protein	255.99	217.25	161.4	216.99	212.907	38.9215	323.36	183.45	232.37	246.393	71.0014	0.126528	0.671205
TKVG1_03375	TKV_RS07290		YggT family protein	198.56	214.34	152.13	204.31	192.335	27.5851	249.78	170.53	250.48	223.597	45.9584	0.148186	0.635409
TKVG1_03370	TKV_RS07295	sepF	cell division protein SepF	212.97	251.06	183.1	234.29	220.355	29.3227	305.27	192.63	248.05	248.65	56.3224	0.0922681	0.753879
TKVG1_03365	TKV_RS07300		YggS family pyridoxal phosphate-dependent enzyme	263.6	245.82	187.09	268.7	241.303	37.4487	357.78	189.62	307.92	285.107	86.37	0.153596	0.647937
TKVG1_03360	TKV_RS07305		HlyD family efflux transporter periplasmic adaptor subunit	148.46	129.77	96.72	136.82	127.943	22.1958	236.99	118.6	245.49	200.36	70.9337	0.534723	0.142412
TKVG1_03355	TKV_RS12430		beta-eliminating lyase-related protein	5.11	29.54	0	19.77	13.605	13.5301	11.4	32.37	26.34	23.37	10.7959	0.447503	0.554276
TKVG1_03350	TKV_RS07310		RidA family protein	432.3	521.66	391.32	445.91	447.798	54.4338	374.32	477.47	328.22	393.337	76.4207	-0.222592	0.514383
TKVG1_03345	TKV_RS07315		pneumococcal-type histidine triad protein	84.36	73.62	76.5	76.34	77.705	4.62931	56.81	59.58	36.62	51.0033	12.5331	-0.64143	0.051372
TKVG1_03340	TKV_RS07320		VWA-like domain-containing protein	280.31	309.95	343.55	270.68	301.123	32.8528	234.13	254.42	166.03	218.193	46.2999	-0.508239	0.156773
TKVG1_03335	TKV_RS07325		AAA family ATPase	213.53	229.08	261.13	194.52	224.565	28.1772	152.31	160.06	130.92	147.763	15.0927	-0.642362	0.0551445
TKVG1_03330	TKV_RS07330	nadC	carboxylating nicotinate-nucleotide diphosphorylase	112.41	117.25	113.3	102.3	111.315	6.36746	88.15	88.58	78.58	85.1033	5.65346	-0.43761	0.120908
TKVG1_03325	TKV_RS07335	nadB	L-aspartate oxidase	139.94	137.55	164.01	115.59	139.273	19.8008	131.49	132.55	107.42	123.82	14.2127	-0.236632	0.510552
TKVG1_03320	TKV_RS07340	nadA	quinolinate synthase NadA	180.04	195	180.23	173.27	182.135	9.16723	158.25	166.25	130.96	151.82	18.5028	-0.317308	0.269988
TKVG1_03315	TKV_RS12435	ruvX	Holliday junction resolvase RuvX	185.62	204.13	154.43	131.57	168.938	32.2677	109.47	218.17	170.41	166.017	54.483	-0.0430393	0.940208
TKVG1_03310	TKV_RS07345		acyl-CoA dehydratase activase	104.54	116.12	120.35	81.73	105.685	17.3119	91.98	138.69	97.2	109.29	25.5946	-0.00622289	0.991106
TKVG1_03305	TKV_RS07350		2-hydroxyacyl-CoA dehydratase family protein	133.65	129.72	109.83	110.12	120.83	12.6371	109.06	147.22	101.99	119.423	24.3308	-0.0588986	0.884205
TKVG1_03300	TKV_RS13830		hypothetical protein	321.34	283.11	287.71	277.8	292.49	19.655	242.93	291.54	234.83	256.433	30.6718	-0.236498	0.497431
TKVG1_03290	TKV_RS07360	spoIVA	stage IV sporulation protein A	52.19	54.34	29.54	53.53	47.4	11.9396	90.2	43.66	53.68	62.5133	24.4952	0.293488	0.43054
TKVG1_03285	TKV_RS07365		NAD(P)H-dependent glycerol-3-phosphate dehydrogenase	181.43	162.19	95.5	170.35	152.368	38.7229	186.4	130.91	113.88	143.73	37.9217	-0.142743	0.682294
TKVG1_03280	TKV_RS07370	plsY	glycerol-3-phosphate 1-O-acyltransferase PlsY	154.42	133.86	104.91	168.09	140.32	27.4808	114.63	135.99	72.38	107.667	32.3717	-0.401132	0.309117
TKVG1_03275	TKV_RS07375	der	ribosome biogenesis GTPase Der	280.03	239.85	143.94	302.04	241.465	69.9293	257.26	179.05	174.44	203.583	46.5425	-0.291665	0.393339
TKVG1_03270	TKV_RS07380		DUF512 domain-containing protein	132.72	115.88	77.7	142.99	117.323	28.6817	132.02	81.94	111.65	108.537	25.1847	-0.169243	0.621151
TKVG1_03265	TKV_RS07385		DUF3189 family protein	7.52	9.22	4.52	4.2	6.365	2.42049	11.8	10.1	15.44	12.4467	2.7281	0.727591	0.195778
TKVG1_03260	TKV_RS07390		DUF3189 family protein	6.07	19.14	0.37	9.74	8.83	7.88064	29.41	25.24	22.04	25.5633	3.69562	1.06077	0.105884
TKVG1_03255	TKV_RS07395		hypothetical protein	2.86	19.51	4.76	10.31	9.36	7.46849	14.86	36.18	35.18	28.74	12.0308	1.09403	0.104706
TKVG1_03250	TKV_RS07400		YIEGIA family protein	9	25.35	6.07	8.12	12.135	8.89511	17.53	45.73	31.37	31.5433	14.1008	1.0659	0.080747
TKVG1_03245	TKV_RS07405	spoIIP	stage II sporulation protein P	9.53	33.67	8.19	14.16	16.3875	11.8021	21.29	60.3	26.46	36.0167	21.1883	0.871772	0.160637
TKVG1_03240	TKV_RS07410		DUF1614 domain-containing protein	9.3	28.88	10.33	8.1	14.1525	9.86053	27.44	53.29	25.35	35.36	15.563	1.00335	0.0910438
TKVG1_03235	TKV_RS07415	phoU	phosphate signaling complex protein PhoU	397.51	440.56	313.77	332.61	371.112	58.5673	457.43	323.16	366.2	382.263	68.5611	-0.0288838	0.918462
TKVG1_03230	TKV_RS07420	pstB	phosphate ABC transporter ATP-binding protein PstB	341.97	339.67	235.2	316.27	308.278	50.0828	506.87	251.38	461.7	406.65	136.351	0.303746	0.372792
TKVG1_03225	TKV_RS07425	pstA	phosphate ABC transporter permease PstA	80.04	54.31	36.45	83.4	63.55	22.2541	197.71	44.77	169.74	137.407	81.4355	0.841131	0.124518
TKVG1_03220	TKV_RS07430	pstC	phosphate ABC transporter permease subunit PstC	169.59	110.74	63.3	149.22	123.213	46.8057	268.07	80.7	233.07	193.947	99.6236	0.492061	0.354829
TKVG1_03215	TKV_RS07435		IS1634 family transposase	55.24	63.84	55.47	54.32	57.2175	4.44287	100.51	43.86	105.42	83.2633	34.2125	0.41025	0.332277
TKVG1_03210	TKV_RS07440		phosphate ABC transporter substrate-binding protein	707.23	547.64	224.4	971.69	612.74	312.42	879.06	747.78	839.19	822.01	67.3051	0.337174	0.519872
TKVG1_03205	TKV_RS07445		ATP-binding protein	116.32	107.09	110.61	88.75	105.692	11.9181	178.82	99.1	138.36	138.76	39.8615	0.278912	0.387729
TKVG1_03200	TKV_RS07450		response regulator transcription factor	197.13	227.33	198.97	184.69	202.03	18.0198	244.8	150.31	176.92	190.677	48.724	-0.167748	0.557513
TKVG1_03195	TKV_RS07455	nrdR	transcriptional regulator NrdR	127.63	167.22	160.82	159.67	153.835	17.7829	190.69	122.37	134.5	149.187	36.4511	-0.135616	0.701028
TKVG1_03190	TKV_RS07460		YlmC/YmxH family sporulation protein	2.37	0	2.63	6.11	2.7775	2.51713	7.63	6.14	11.31	8.36	2.66118	0.897784	0.212151
TKVG1_03185	TKV_RS07465	sigG	RNA polymerase sporulation sigma factor SigG	54.03	148.93	33.58	72.09	77.1575	50.3681	98.69	179.92	115.89	131.5	42.8058	0.631951	0.273444
TKVG1_03180	TKV_RS07470	sigE	RNA polymerase sporulation sigma factor SigE	15.25	17.71	8.47	9.73	12.79	4.40772	30.43	8.55	27.44	22.14	11.8639	0.597094	0.279746
TKVG1_03175	TKV_RS07475	spoIIGA	sigma-E processing peptidase SpoIIGA	24.36	18.29	12.37	13.46	17.12	5.46945	37.95	20.44	33.25	30.5467	9.06262	0.694426	0.0901314
TKVG1_03170	TKV_RS07480	ftsZ	cell division protein FtsZ	423.23	390.58	292.33	397.24	375.845	57.431	432.87	368.11	385.7	395.56	33.487	0.0143585	0.955602
TKVG1_03165	TKV_RS07485	ftsA	cell division protein FtsA	407.96	346.37	302.17	354.32	352.705	43.396	400.08	381.4	357.07	379.517	21.5668	0.0451511	0.858081
TKVG1_03160	TKV_RS07490		small basic family protein	233.03	232.97	191.39	224.68	220.517	19.8105	243.15	222.19	274.7	246.68	26.4324	0.102329	0.733912
TKVG1_03155	TKV_RS07495		DUF881 domain-containing protein	280	256.01	196.08	262.01	248.525	36.419	311.13	278.17	309.57	299.623	18.5955	0.208539	0.368487
TKVG1_03150	TKV_RS07500		FtsQ-type POTRA domain-containing protein	246.78	220.29	167.01	185.49	204.892	35.6052	275.73	246.25	314.52	278.833	34.2406	0.378714	0.170085
TKVG1_03145	TKV_RS07505	murA	UDP-N-acetylglucosamine 1-carboxyvinyltransferase	211.84	171.17	108.92	193.59	171.38	44.8389	212.31	174.96	246.47	211.247	35.7669	0.244843	0.480858
TKVG1_03140	TKV_RS07510	murG	undecaprenyldiphospho-muramoylpentapeptide beta-N-acetylglucosaminyltransferase	321.34	291.23	183.71	305.66	275.485	62.4066	333.07	313.11	389.54	345.24	39.6417	0.272563	0.3826
TKVG1_03135	TKV_RS07515	spoVE	stage V sporulation protein E	229.58	197.63	157.6	231.38	204.048	34.6291	254.07	287.29	294.55	278.637	21.5828	0.389236	0.190041
TKVG1_03130	TKV_RS07520	murD	UDP-N-acetylmuramoyl-L-alanine--D-glutamate ligase	354.77	319.43	202.15	349.31	306.415	71.2245	437.9	379.22	480.54	432.553	50.8712	0.432768	0.144643
TKVG1_03125	TKV_RS07525	mraY	phospho-N-acetylmuramoyl-pentapeptide-transferase	236.3	235.2	145.33	223.05	209.97	43.5095	334	316.07	361.04	337.037	22.6383	0.615027	0.021098
TKVG1_03120	TKV_RS07530	murF	UDP-N-acetylmuramoyl-tripeptide--D-alanyl-D-alanine ligase	363.89	307.3	210.18	322.67	301.01	65.0966	408.45	369.24	494.4	424.03	64.018	0.431757	0.155855
TKVG1_03115	TKV_RS07535		UDP-N-acetylmuramoyl-L-alanyl-D-glutamate--2, 6-diaminopimelate ligase	364.1	316.1	205.86	333.66	304.93	68.9593	381.73	367.82	442.36	397.303	39.6352	0.327604	0.285181
TKVG1_03110	TKV_RS07540		stage V sporulation protein D	311.49	271.97	181.32	316.59	270.342	62.6088	325.27	332.4	353.36	337.01	14.6014	0.266352	0.388385
TKVG1_03105	TKV_RS07545	ftsL	cell division protein FtsL	312.93	240.68	171.31	254.77	244.923	58.1916	171.7	301.09	216.42	229.737	65.7149	-0.0964282	0.840485
TKVG1_03100	TKV_RS07550	rsmH	16S rRNA (cytosine(1402)-N(4))-methyltransferaseRsmH	400.32	391.74	295.74	471.42	389.805	72.1654	308.54	470.64	354.11	377.763	83.5985	-0.0683354	0.877608
TKVG1_03095	TKV_RS07555	mraZ	division/cell wall cluster transcriptional repressor MraZ	400.51	353.33	246.87	457.63	364.585	89.3149	251.33	329.65	263.12	281.367	42.2281	-0.378877	0.308157
TKVG1_03090	TKV_RS07560		pitrilysin family protein	169.23	143.08	143.43	149.76	151.375	12.2928	345.55	84.13	224.28	217.987	130.824	0.346542	0.485771
TKVG1_03085	TKV_RS07565		pitrilysin family protein	218.46	200.5	135.25	195.55	187.44	36.1588	464.28	120.57	322.93	302.593	172.755	0.513553	0.285181
TKVG1_03080	TKV_RS07570		YhcN/YlaJ family sporulation lipoprotein	154.56	260.4	69.98	82.83	141.942	87.3008	236.21	442.46	269.47	316.047	110.733	0.956698	0.0825071
TKVG1_03075	TKV_RS07575	ychF	redox-regulated ATPase YchF	315.96	292.03	232.68	323.97	291.16	41.2804	440.68	245.92	335.08	340.56	97.4956	0.136809	0.638244
TKVG1_03070	TKV_RS13545		hypothetical protein	663.48	767.1	686.73	722.51	709.955	45.1756	1001.5	748.16	706.82	818.827	159.544	0.116664	0.666351
TKVG1_03065	TKV_RS07585		DUF2089 domain-containing protein	952.64	873.4	745.51	857.84	857.348	85.335	1205.54	726.86	849.26	927.22	248.68	0.0256554	0.930211
TKVG1_03060	TKV_RS07590	thiI	tRNA uracil 4-sulfurtransferase ThiI	377.55	346.11	227.96	373.13	331.188	70.2074	403.46	265.33	230.93	299.907	91.3143	-0.210215	0.496617
TKVG1_03055	TKV_RS07595		cysteine desulfurase family protein	292.29	261.14	182.21	291.32	256.74	51.7483	326.86	203.85	201.16	243.957	71.809	-0.146977	0.633337
TKVG1_03050	TKV_RS07600		metal-sensitive transcriptional regulator	397.1	387.04	226.08	411.85	355.518	86.8911	509.39	285.21	290.22	361.607	128.009	-0.0531627	0.897832
TKVG1_03045	TKV_RS07605		hypothetical protein	422.84	379.1	265.39	375.34	360.667	67.0777	546.16	392.38	322.82	420.453	114.286	0.141862	0.634028
TKVG1_03040	TKV_RS07610		class II SORL domain-containing protein	1006	1011.33	666.61	878.7	890.66	161.458	1084.77	936.75	706.82	909.447	190.449	-0.0315166	0.926184
TKVG1_03035	TKV_RS07615		ferritin family protein	598.43	481.52	338.09	417.95	458.997	109.928	522.25	526.46	330.67	459.793	111.844	-0.047913	0.909562
TKVG1_03030	TKV_RS07620	cobT	nicotinate-nucleotide--dimethylbenzimidazole phosphoribosyltransferase	1159.52	1255.25	871.03	1189.24	1118.76	169.93	1249.54	1443	864.3	1185.61	294.599	0.0323953	0.936307
TKVG1_03025	TKV_RS07625		ferritin family protein	447.02	399.67	310.85	410.02	391.89	57.7235	449.34	510.96	343.24	434.513	84.8373	0.0932666	0.789797
TKVG1_03020	TKV_RS07630	lipA	lipoyl synthase	163.48	145.16	131.53	175.17	153.835	19.3303	139.28	225.23	147.86	170.79	47.3412	0.107076	0.808687
TKVG1_03015	TKV_RS07635	lipB		89.63	92.94	57.87	96.51	84.2375	17.8014	79.84	126.94	69.13	91.97	30.7547	0.0884035	0.85687
TKVG1_03010	TKV_RS07640	lpdA	dihydrolipoyl dehydrogenase	109.58	122.21	77.51	114.03	105.833	19.5928	86.33	171.21	80.98	112.84	50.6206	0.0695105	0.899822
TKVG1_03005	TKV_RS07645		hypothetical protein	5.25	2.98	2.22	2.17	3.155	1.445	20	4.11	11.52	11.8767	7.951	1.38707	0.0161355
TKVG1_03000	TKV_RS07650		DUF3343 domain-containing protein	40.64	24.33	15.68	11.65	23.075	12.8494	81.7	27.31	48.26	52.4233	27.433	0.868809	0.126556
TKVG1_02995	TKV_RS07655		CAP domain-containing protein	53.53	53.87	23.51	33.38	41.0725	15.1281	96.25	38.23	49.04	61.1733	30.8544	0.432217	0.359207
TKVG1_02990	TKV_RS07660		aminopeptidase	557.67	465.07	339.81	514.44	469.248	94.2203	574.85	330.22	374.65	426.573	130.319	-0.210177	0.468159
TKVG1_02985	TKV_RS07665		response regulator transcription factor	168.87	112.56	59.37	134.65	118.863	45.9314	231.19	88.01	150.92	156.707	71.7652	0.281878	0.567134
TKVG1_02980	TKV_RS07670		sensor histidine kinase	203.55	132.89	96.24	192.58	156.315	50.6755	266.25	130.94	187.78	194.99	67.9425	0.221259	0.599082
TKVG1_02970	TKV_RS07680	yunB	sporulation protein YunB	78.26	65.77	60.69	78.57	70.8225	9.00991	134.84	49.41	87.55	90.6	42.7966	0.226625	0.591642
TKVG1_02965	TKV_RS07685		DUF523 domain-containing protein	143.97	108.05	94.13	127.78	118.482	21.8932	122.81	74.81	95.97	97.8633	24.0559	-0.336022	0.273261
TKVG1_02960	TKV_RS07690		endonuclease MutS2	215.42	196.58	169.2	188.97	192.543	19.1252	227.8	157.98	140.49	175.423	46.1948	-0.213554	0.372381
TKVG1_02955	TKV_RS07695		U32 family peptidase	234.22	189.02	203.92	199.22	206.595	19.4385	209.2	169.23	115.65	164.693	46.9397	-0.394835	0.21358
TKVG1_02950	TKV_RS07700		cell division protein ZapA	296.33	272.72	265.84	225.94	265.207	29.254	214.45	229.02	119.14	187.537	59.6796	-0.528082	0.165509
TKVG1_02945	TKV_RS07705			450.01	484.66	559.21	448.58	485.615	51.8216	430.23	393.64	337.74	387.203	46.5797	-0.393426	0.215201
TKVG1_02940	TKV_RS12440			395.31	381.78	327.73	362.95	366.942	29.3168	345.57	279.98	213.29	279.613	66.1408	-0.454618	0.0768691
TKVG1_02935	TKV_RS07715	pheT	phenylalanine--tRNA ligase subunit beta	238.58	182.82	184.64	172.96	194.75	29.6671	213.15	143.75	164.78	173.893	35.5862	-0.238306	0.370931
TKVG1_02930	TKV_RS07720	pheS	phenylalanine--tRNA ligase subunit alpha	299.14	247.21	206.74	223.86	244.238	40.1847	298.25	183.85	268.69	250.263	59.3843	-0.0374608	0.912851
TKVG1_02925	TKV_RS07725		RNA methyltransferase	517.26	422.27	400.68	369.57	427.445	63.6642	525.06	326.04	552.22	467.773	123.494	0.0519973	0.895111
TKVG1_02920	TKV_RS07730	rplT	50S ribosomal protein L20	1409.08	1234.98	1227.25	1273.15	1286.12	84.3966	1146.23	841.94	1151.49	1046.55	177.22	-0.359989	0.155654
TKVG1_02915	TKV_RS07735	rpmI	50S ribosomal protein L35	784.11	665.74	723.36	768.57	735.445	53.1362	690.55	437.98	706.51	611.68	150.64	-0.329662	0.309117
TKVG1_02910	TKV_RS07740	infC	translation initiation factor IF-3	759.05	603.68	612.12	691.62	666.617	73.2575	602.15	445.65	646.52	564.773	105.522	-0.296403	0.307936
TKVG1_02905	TKV_RS07745		chorismate synthase	182.85	175.05	192.73	172.77	180.85	9.01962	185.38	111.66	120.19	139.077	40.326	-0.461338	0.119714
TKVG1_02900	TKV_RS07750		MFS transporter	107.06	92.44	96.3	83.54	94.835	9.74525	132.21	59.11	105.23	98.85	36.9653	-0.0391182	0.932184
TKVG1_02895	TKV_RS07755	thrS	threonine--tRNA ligase	178.9	119.18	118.08	142.1	139.565	28.4653	188.49	81.89	118.18	129.52	54.1972	-0.195571	0.618001
TKVG1_02890	TKV_RS07760		DUF445 family protein	31.07	40.32	22.93	23.79	29.5275	8.06852	50.77	22.09	40.04	37.6333	14.4907	0.244585	0.587404
TKVG1_02885	TKV_RS07765	ytxC	putative sporulation protein YtxC	26.68	29.96	17.67	18.8	23.2775	5.99235	69.97	29.77	66.82	55.52	22.3557	1.05758	0.0123896
TKVG1_02880	TKV_RS07770		hypothetical protein	41.41	32.49	14.09	15.94	25.9825	13.199	69.54	18.26	57.6	48.4667	26.8323	0.665864	0.24883
TKVG1_02875	TKV_RS07775		response regulator	82.42	60.06	38.33	81.15	65.49	20.8087	171.93	42.61	189.03	134.523	80.0572	0.791018	0.15032
TKVG1_02870	TKV_RS07780		thioredoxin family protein	33.81	14.58	5.78	14.75	17.23	11.8205	146.1	20.97	190.07	119.047	87.7361	1.84867	0.00379761
TKVG1_02865	TKV_RS07785		ISL3 family transposase	390.84	370.7	217.97	299.43	319.735	78.3619	631.03	374.64	715.3	573.657	177.429	0.734991	0.0394212
TKVG1_02835	TKV_RS07815	hslO	Hsp33 family molecular chaperone HslO	172.3	118.67	60.71	112.03	115.928	45.6419	282.56	139.12	324.74	248.807	97.3045	0.928501	0.0437108
TKVG1_02830	TKV_RS07820		cold-shock protein	179.91	151.6	58.71	177.47	141.922	56.9346	389.26	116.76	458.11	321.377	180.516	0.907676	0.108613
TKVG1_02825	TKV_RS07825		NAD-dependent protein deacylase	154.8	172.36	89.04	143.39	139.898	35.9378	193.09	108.01	139.42	146.84	43.0226	-0.000373757	0.999053
TKVG1_02820	TKV_RS07830		small, acid-soluble spore protein, alpha/beta type	11.07	17.01	4.73	2.64	8.8625	6.50774	44.75	25.5	51.4	40.55	13.4511	1.49084	0.0142829
TKVG1_02815	TKV_RS07835		hypothetical protein	24.57	18.39	11.79	9.22	15.9925	6.90047	54.56	22.52	63.55	46.8767	21.5671	1.26104	0.0123804
TKVG1_02810	TKV_RS07840		NifU family protein	284.72	303.43	264.62	276.09	282.215	16.3651	311.53	202.49	215.76	243.26	59.4947	-0.287879	0.284899
TKVG1_02805	TKV_RS13970			169.71	165.58	137.53	151.84	156.165	14.584	156.46	132.82	125.73	138.337	16.0906	-0.23716	0.316252
TKVG1_02800	TKV_RS07850		Uma2 family endonuclease	254.94	191.3	194.03	167.53	201.95	37.2775	195.03	199.35	144.95	179.777	30.238	-0.220468	0.520272
TKVG1_02795	TKV_RS07855		prolipoprotein diacylglyceryl transferase	177.25	164.96	164.34	143.63	162.545	13.9412	254.07	157.77	266.84	226.227	59.6281	0.373842	0.264149
TKVG1_02785	TKV_RS07865	pepV	dipeptidase PepV	17.54	19.53	17.4	16.15	17.655	1.39749	50.92	26.21	37.59	38.24	12.3678	0.960584	0.00327013
TKVG1_02775	TKV_RS07875		type I phosphomannose isomerase catalytic subunit	159.34	124.62	87.43	159.8	132.798	34.4418	98.37	91.49	50.51	80.1233	25.8756	-0.726461	0.0593589
TKVG1_02770	TKV_RS07880	deoD	purine-nucleoside phosphorylase	341.7	313.83	189.73	387.33	308.147	84.5589	262.44	222.69	132.71	205.947	66.466	-0.593769	0.12469
TKVG1_02765	TKV_RS12840			57.04	98.96	65.84	92.53	78.5925	20.2996	80.15	116.08	70.18	88.8033	24.1425	0.108562	0.835982
TKVG1_02760	TKV_RS13080		hypothetical protein	9.99	9.01	5.82	6.87	7.9225	1.91359	16.04	19.73	5.74	13.8367	7.25059	0.516755	0.421835
TKVG1_02745	TKV_RS07900		Nif3-like dinuclear metal center hexameric protein	149.56	178.06	198.81	132.32	164.688	29.5503	143.35	266.78	129.68	179.937	75.5185	0.0656346	0.912268
TKVG1_02740	TKV_RS07905		class I SAM-dependent methyltransferase	66.52	65.15	64.5	65.42	65.3975	0.842076	64.72	89.22	54.02	69.32	18.0452	0.0245582	0.959433
TKVG1_02725	TKV_RS07920	rpoD	RNA polymerase sigma factor RpoD	337.66	279.11	224.37	317.93	289.767	49.9241	357.73	303.61	314.92	325.42	28.547	0.10478	0.671205
TKVG1_02720	TKV_RS07925	dnaG	DNA primase	205.02	193.68	129.61	189.46	179.443	33.8651	301.04	195.79	231.6	242.81	53.513	0.355837	0.136339
TKVG1_02715	TKV_RS07930		deoxyguanosinetriphosphate triphosphohydrolase	409.78	299.55	199.18	337.34	311.462	87.7216	582.22	265.33	390.61	412.72	159.598	0.300465	0.432994
TKVG1_02710	TKV_RS07935	secG	preprotein translocase subunit SecG	950.31	822.89	572.49	893.21	809.725	166.521	1347.56	611.54	729.96	896.353	395.217	0.0469536	0.914206
TKVG1_02705	TKV_RS07940	eno	phosphopyruvate hydratase	3845.94	3169.57	1916.06	3842.72	3193.57	909.137	3721.34	1440.06	706.51	1955.97	1572.23	-0.688598	0.210569
TKVG1_02700	TKV_RS07945	gpmI	2,3-bisphosphoglycerate-independent phosphoglycerate mutase	3134.44	2633.16	1626.84	3068.28	2615.68	695.718	3068.08	1260.79	751.83	1693.57	1217.26	-0.640316	0.204833
TKVG1_02695	TKV_RS07950	tpiA	triose-phosphate isomerase	3669.1	3171.58	1924.05	3608.61	3093.34	810.424	3607.4	1474.15	1062.61	2048.05	1366.02	-0.622621	0.188733
TKVG1_02690	TKV_RS07955		phosphoglycerate kinase	3448.44	2917.75	1762.57	3270.59	2849.84	757.654	3364.75	1353.78	1105.46	1941.33	1238.95	-0.59024	0.19724
TKVG1_02685	TKV_RS07960	gap	type I glyceraldehyde-3-phosphate dehydrogenase	7298.52	6342.72	3547.22	7665.63	6213.52	1862.95	5806.76	2961.51	1642.37	3470.21	2128.29	-0.818069	0.0874842
TKVG1_02680	TKV_RS07965		sugar-binding domain-containing protein	925.53	677.64	408.62	857.44	717.308	230.836	1035.37	425.65	739.84	733.62	304.908	-0.0431148	0.935009
TKVG1_02675	TKV_RS07970	rpoN	RNA polymerase factor sigma-54	47.15	94.63	78.12	49.3	67.3	23.0508	98.8	218.96	213.09	176.95	67.7435	1.14259	0.0284181
TKVG1_02670	TKV_RS07975		acylphosphatase	55.48	85.24	80.03	87.49	77.06	14.722	63.46	87.86	77.26	76.1933	12.2349	-0.0682034	0.897932
TKVG1_02665	TKV_RS07980		Cof-type HAD-IIB family hydrolase	170.89	191.14	128.88	155.69	161.65	26.2325	142.81	162.45	122.16	142.473	20.1471	-0.220904	0.465535
TKVG1_02660	TKV_RS07985		Fur family transcriptional regulator	1639.24	1642.44	1642.46	1771.44	1673.89	65.0476	2029.19	1212.22	2131.05	1790.82	503.664	0.0116364	0.981494
TKVG1_02655	TKV_RS07990		VanW family protein	52.79	53.06	40	54.85	50.175	6.84465	92.33	51.02	61.06	68.1367	21.545	0.339501	0.229954
TKVG1_02650	TKV_RS07995	nth	endonuclease III	36.75	41.73	18.65	40.95	34.52	10.8037	55.1	40.24	38.56	44.6333	9.10324	0.286524	0.468159
TKVG1_02645	TKV_RS08000	queG	tRNA epoxyqueuosine(34) reductase QueG	48.29	41.79	34.41	37.85	40.585	5.95623	55.2	44.47	38.06	45.91	8.66026	0.103428	0.735245
TKVG1_02640	TKV_RS08005		ATP-binding protein	34.05	30.74	32.97	35.5	33.315	2.00533	41.22	34.74	27.61	34.5233	6.80759	-0.0297357	0.935009
TKVG1_02635	TKV_RS08010		alpha/beta-type small acid-soluble spore protein	76.01	123.55	53.24	38.22	72.755	37.2569	112.09	146.4	86.09	114.86	30.2503	0.527946	0.326075
TKVG1_02630	TKV_RS08015	fdx2	[4Fe4S] ferredoxin	434.61	463.34	303.98	434.78	409.178	71.4199	498.84	272.46	250.33	340.543	137.535	-0.334137	0.327408
TKVG1_02625	TKV_RS08020		iron-dependent repressor	649.07	807.66	1010.67	573.46	760.215	193.399	571.15	812.64	747.11	710.3	124.882	-0.148667	0.770377
TKVG1_02620	TKV_RS08025		radical SAM protein	686.39	907.16	1294.56	692.87	895.245	285.29	791.89	1173.4	904.22	956.503	196.055	0.0135885	0.983662
TKVG1_02615	TKV_RS08030		ABC transporter ATP-binding protein	64.5	78.91	79.67	32.69	63.9425	21.9728	37.21	273.87	219.72	176.933	123.996	1.04724	0.107274
TKVG1_02610	TKV_RS13835		hypothetical protein	49.68	106.81	97.85	20.96	68.825	40.5911	66.03	283.46	247.54	199.01	116.556	1.04313	0.119039
TKVG1_02605	TKV_RS02520		DUF2149 domain-containing protein	31.07	62.26	67.97	24.54	46.46	21.8301	32.73	140.9	146.48	106.703	64.1235	0.842419	0.193992
TKVG1_02600	TKV_RS08040		MotA/TolQ/ExbB proton channel family protein	42.42	66.29	96.55	26.68	57.985	30.433	28.34	154.15	134.62	105.703	67.7065	0.578612	0.389105
TKVG1_02595	TKV_RS02510		cobaltochelatase subunit CobN	40.43	76.2	94.95	42.38	63.49	26.6375	38.14	222.44	186.49	149.023	97.6956	0.868934	0.180091
TKVG1_02590	TKV_RS02505		stalk domain-containing protein	125.27	194.73	187.13	80.63	146.94	54.0547	109.14	690.1	555.28	451.507	304.065	1.17876	0.0618476
TKVG1_02585	TKV_RS02500	cobN	cobaltochelatase subunit CobN	99.04	136.69	120.36	66.87	105.74	30.1519	88.11	344.29	251.3	227.9	129.683	0.878373	0.127516
TKVG1_02580	TKV_RS02495			2193.56	2267.29	1318.3	2290.06	2017.3	467.818	2781.61	3249.85	1757.98	2596.48	762.97	0.29915	0.444776
TKVG1_02575	TKV_RS02490		Tex family protein	239.81	184.59	190.13	180.14	198.667	27.7311	241.78	126.25	133.95	167.327	64.5933	-0.335775	0.310847
TKVG1_02570		prfB	peptide chain release factor 2	902	676.14	606.7	715.7	725.135	126.224	1166.14	458.96	825.82	816.973	353.673	0.0662212	0.884205
TKVG1_02565	TKV_RS02480	secA	preprotein translocase subunit SecA	717.99	585.85	446.22	573.3	580.84	111.077	1120.8	395.37	1011.55	842.573	391.123	0.404639	0.359207
TKVG1_02560	TKV_RS02475		hypothetical protein	3939.29	3257.2	3539.71	4417.39	3788.4	504.122	2047.85	1659.28	82.45	1263.19	1040.85	-1.10626	0.102077
TKVG1_02555	TKV_RS02470		transcription repressor NadR	134.57	128.92	90.86	128.55	120.725	20.0997	165.21	86.65	135.91	129.257	39.7004	0.021701	0.957553
TKVG1_02550	TKV_RS02465		DUF5317 domain-containing protein	94.36	85.05	68.33	83.2	82.735	10.7737	121.92	82.58	105.16	103.22	19.7416	0.236513	0.370993
TKVG1_02545	TKV_RS02460		HD domain-containing phosphohydrolase	52.32	41.55	30.84	51.72	44.1075	10.1318	39.29	47.23	35.38	40.6333	6.03813	-0.150474	0.69773
TKVG1_02540	TKV_RS02455		hypothetical protein	135.89	138.31	108.39	150.93	133.38	17.9175	134.04	137.95	99.71	123.9	21.0402	-0.160624	0.610919
TKVG1_02535	TKV_RS02450	raiA	ribosome-associated translation inhibitor RaiA	523.08	484.81	371.69	564.31	485.973	82.8162	409.87	367.42	205.77	327.687	107.695	-0.597369	0.0904171
TKVG1_02530	TKV_RS02445		amino acid ABC transporter ATP-binding protein	139.6	53.57	90.43	162.28	111.47	48.881	102.64	74.24	66.05	80.9767	19.2027	-0.47536	0.343885
TKVG1_02525	TKV_RS02440		amino acid ABC transporter permease	96	58.19	43.2	108.53	76.48	30.8238	82.53	62.24	55.68	66.8167	13.9979	-0.232761	0.618001
TKVG1_02520	TKV_RS02435		basic amino acid ABC transporter substrate-binding protein	315.09	199.83	161.84	360.69	259.363	93.8573	315.5	176.52	241.7	244.573	69.5345	-0.144883	0.754009
TKVG1_02515	TKV_RS02430		zinc-ribbon domain-containing protein	55.9	51.03	49.04	47.04	50.7525	3.79864	129.8	45.75	201.22	125.59	77.8205	1.00866	0.0670892
TKVG1_02510	TKV_RS02425		methyl-accepting chemotaxis protein	9.39	18.73	18.11	5.27	12.875	6.62489	11.98	51.94	30.42	31.4467	19.9998	0.921709	0.149604
TKVG1_02505	TKV_RS02420	flgN	flagellar export chaperone FlgN	11.62	8.45	8.6	4.61	8.32	2.87225	20.08	27.78	23.66	23.84	3.85315	1.22098	0.0155121
TKVG1_02500	TKV_RS02415	fliS	flagellar export chaperone FliS	15.05	20.18	19.24	26.78	20.3125	4.85422	43.28	39.44	41.26	41.3267	1.92087	0.855312	0.0437431
TKVG1_02495	TKV_RS02410	fliD	flagellar filament capping protein FliD	21.02	23.46	8.68	27.05	20.0525	7.97592	31.85	46	35.74	37.8633	7.31006	0.793491	0.0929567
TKVG1_02490	TKV_RS02405		flagellar protein FlaG	14.05	22.83	12.3	19.33	17.1275	4.83547	18.58	36.29	26.13	27	8.887	0.515764	0.347667
TKVG1_02485	TKV_RS02400		Spo0E family sporulation regulatory protein-aspartic acid phosphatase	148.77	153.1	140.95	235.84	169.665	44.4023	141.28	115.43	103.17	119.96	19.4547	-0.531008	0.160189
TKVG1_02480	TKV_RS02395	asnB	asparagine synthase (glutamine-hydrolyzing)	39.38	34.41	29.87	30.91	33.6425	4.28977	94.61	27.14	69.82	63.8567	34.128	0.721304	0.115049
TKVG1_02475	TKV_RS02390		DNA methyltransferase	224.25	202.95	171.59	200.68	199.868	21.6355	235.82	175.48	187.04	199.447	32.0261	-0.075394	0.733912
TKVG1_02470	TKV_RS02385		type II restriction endonuclease	202.09	174.04	168.34	173.88	179.588	15.2339	185.77	156.44	168.43	170.213	14.7461	-0.142721	0.546771
TKVG1_02465	TKV_RS02380		DNA adenine methylase	165.3	181.39	164.52	164.58	168.948	8.30257	172.72	153.1	126.55	150.79	23.1715	-0.23392	0.370176
TKVG1_02460	TKV_RS13320		flagellin	447.84	588.65	612.22	426.22	518.733	95.2412	479.03	768.03	479.94	575.667	166.592	0.0838072	0.871995
TKVG1_02455	TKV_RS13315			142.17	130.86	177.25	136.99	146.817	20.8083	134.41	223.65	140.2	166.087	49.9353	0.105645	0.836999
TKVG1_02450	TKV_RS02370	csrA	carbon storage regulator CsrA	229.32	275.98	283.92	215.45	251.168	33.8696	233.04	210.41	198.52	213.99	17.5362	-0.296235	0.384815
TKVG1_02445	TKV_RS02365	fliW	flagellar assembly protein FliW	136.96	185.2	195.42	119.72	159.325	36.702	164.14	115.16	118.35	132.55	27.4042	-0.338582	0.392958
TKVG1_02440	TKV_RS02360		DUF6470 family protein	209.33	198.09	226.22	184.42	204.515	17.6954	236.5	185.47	137.03	186.333	49.7406	-0.217924	0.533118
TKVG1_02435	TKV_RS02355	flgL	flagellar hook-associated protein FlgL	396.36	401.58	391.74	339.77	382.363	28.6781	349.32	350.67	247.9	315.963	58.9484	-0.332376	0.284899
TKVG1_02430	TKV_RS02350	flgK	flagellar hook-associated protein FlgK	248.06	272.07	261.68	223.42	251.307	21.0312	244.92	236.03	161.34	214.097	45.9043	-0.294683	0.364692
TKVG1_02425	TKV_RS02345		flagellar protein FlgN	131.6	144.11	149.96	114.95	135.155	15.4947	162.84	118.15	102.26	127.75	31.4103	-0.169062	0.636046
TKVG1_02420	TKV_RS02340		flagellar biosynthesis anti-sigma factor FlgM	199.99	162.53	212.26	152.4	181.795	28.8351	206.63	204.81	116.23	175.89	51.6751	-0.122302	0.792474
TKVG1_02415	TKV_RS02335		TIGR03826 family flagellar region protein	205.02	187.97	189	160.67	185.665	18.4011	199.78	125.1	161.23	162.037	37.3465	-0.26978	0.369286
TKVG1_02410	TKV_RS02330		ComF family protein	203.26	203.24	148.94	161.76	179.3	28.146	174.93	165.06	152.85	164.28	11.0606	-0.179516	0.472188
TKVG1_02405	TKV_RS02325		ATP-dependent RecD-like DNA helicase	234.69	222.85	211.82	197.24	216.65	15.9578	223.44	179.97	157.29	186.9	33.6151	-0.285697	0.23464
TKVG1_02400	TKV_RS02315	metK	methionine adenosyltransferase	1924.23	1427.87	1263.35	1961.01	1644.12	351.488	1390.82	1094.8	634.74	1040.12	380.994	-0.685657	0.0657965
TKVG1_02395	TKV_RS02310		rubrerythrin family protein	6620.89	7608.04	10559.8	8921.08	8427.44	1705.44	4476.39	8318.24	5799.31	6197.98	1951.71	-0.439757	0.361354
TKVG1_02375	TKV_RS02290		phosphodiester glycosidase family protein	96.97	102.45	62.62	89.33	87.8425	17.6548	107.02	115.06	250.02	157.367	80.3408	0.723023	0.122616
TKVG1_02370	TKV_RS02285		hypothetical protein	5.77	14.91	8.01	1.98	7.6675	5.43198	9.05	18.82	14.5	14.1233	4.89588	0.59999	0.370931
TKVG1_02365	TKV_RS02280	yyaC	spore protease YyaC	39.85	41	33.68	35.31	37.46	3.51921	52.86	50.09	77.05	60	14.8305	0.583159	0.126235
TKVG1_02360	TKV_RS02275		Gmad2 immunoglobulin-like domain-containing protein	162.33	172.45	106.65	152.31	148.435	29.0448	195.32	168.9	308.01	224.077	73.879	0.514715	0.178529
TKVG1_02355	TKV_RS02270		ATP-binding protein	10.42	22.78	20.49	13.43	16.78	5.81481	39.86	11.04	26.19	25.6967	14.4163	0.388901	0.491481
TKVG1_02350	TKV_RS02265		response regulator transcription factor	42.32	37.03	48.46	32.13	39.985	7.01691	86.67	30.43	66.97	61.3567	28.5371	0.434667	0.36408
TKVG1_02345	TKV_RS02260		LacI family DNA-binding transcriptional regulator	273.71	356.77	411.87	266.27	327.155	69.8022	323.75	324.52	299.19	315.82	14.4071	-0.127028	0.770377
TKVG1_02340	TKV_RS02255		Cof-type HAD-IIB family hydrolase	408.57	316.62	207.51	351.99	321.173	84.7111	562.42	226.5	536.02	441.647	186.789	0.348774	0.428799
TKVG1_02335	TKV_RS02250		DUF421 domain-containing protein	15.1	41.96	10.07	9.79	19.23	15.3485	21.6	36.03	24.74	27.4567	7.5889	0.397677	0.533118
TKVG1_02330	TKV_RS02245		DUF4363 family protein	20.86	39.47	6.74	16.43	20.875	13.7275	22.18	50.67	32.42	35.09	14.4314	0.582522	0.359207
TKVG1_02325	TKV_RS02240		tRNA (adenine-N1)-methyltransferase	283.13	288.25	243.17	234.73	262.32	27.2846	317.34	218.19	218	251.177	57.2992	-0.142142	0.567134
TKVG1_02320	TKV_RS02235		Rossmann-like and DUF2520 domain-containing protein	426.57	322.97	371.77	339.32	365.157	45.6895	264.7	335.86	263.59	288.05	41.4084	-0.374473	0.280534
TKVG1_02315	TKV_RS02230	panB	3-methyl-2-oxobutanoate hydroxymethyltransferase	578.5	465.23	477.07	454.68	493.87	57.1565	381.87	382.64	330.78	365.097	29.7216	-0.483139	0.0679132
TKVG1_02310	TKV_RS02225	panC	pantoate--beta-alanine ligase	414.02	359.74	359.76	327.6	365.28	35.854	314.52	318.54	242.59	291.883	42.7366	-0.375801	0.188436
TKVG1_02305	TKV_RS02220	panD	aspartate 1-decarboxylase	523.73	559.62	626.31	434.55	536.053	79.9092	443.75	427.4	379.85	417	33.1952	-0.418786	0.218232
TKVG1_02300	TKV_RS02215		aconitate hydratase	1239.08	938.05	665.49	889.41	933.007	236.059	767.41	290.01	148.76	402.06	324.189	-1.12208	0.0328066
TKVG1_02295	TKV_RS02210	nifV	homocitrate synthase	1107.1	902.63	627.82	874.75	878.075	196.379	622.39	262.96	100.2	328.517	267.196	-1.26423	0.0184178
[truncated: 444 more rows]

## Sheet: Table S5
Table S5. Selected motifs identified in T. kivui non-coding regions by blasting the Thermoanaerobacteriales motif 5'-TTGTTAANNNNTTAACAA-3' in Geneious.
Motif	Promoter region of gene/gene annotation	locus tag	old locus tag	Minimum	Maximum	Direction	Sequence	Length	Mismatches	Mismatches in the core region (5' tTGTTaannnntTAACAa)
TTGTTAANNNNTTAACAA	ldhA	TKVG1_01170	TKV_RS01135	236049	236066	forward	TTGATAAACTTTTATTAA	18	3	3
TTGTTAANNNNTTAACAA	pfor2	TKVG1_10840	TKV_RS10470	2054334	2054351	reverse	TTTTTAATGAAATAATAT	18	4	2
TTGTTAANNNNTTAACAA	6-phosphofructokinase	TKVG1_09460	TKV_RS09140	1820247	1820264	reverse	TTGATAAAATTTTATCAC	18	3	2
TTGTTAANNNNTTAACAA	6-phosphofructokinase	TKVG1_09460	TKV_RS09140	1820330	1820347	reverse	TTGTTAAAATTTTACCGA	18	2	2
TTGTTAANNNNTTAACAA	gcvT	TKVG1_01230	TKV_RS01195	249042	249059	reverse	TTGTGCTCATCATAACTC	18	4	2
TTGTTAANNNNTTAACAA	hydG	TKVG1_05335	TKV_RS05350	1007117	1007134	forward	TTGTTGAAGACTTAACAA	18	0	0
TTGTTAANNNNTTAACAA	hydE	TKVG1_08800	TKV_RS08520	1676844	1676861	forward	TTGATTTCTTATTAACAA	18	3	2
TTGTTAANNNNTTAACAA	hydE	TKVG1_08800	TKV_RS08520	1676680	1676697	forward	TATTTATATCTTTAACAA	18	3	2
TTGTTAANNNNTTAACAA	ech1D	TKVG1_00670	TKV_RS00650	131918	131935	forward	GTGTTATGCGGTAAATAA	18	4	2
TTGTTAANNNNTTAACAA	nfnA	TKVG1_11280	TKV_RS10870	2132216	2132233	forward	TTGTTAAAAAATAACAAT	18	4	0
TTGTTAANNNNTTAACAA	nfnA	TKVG1_11280	TKV_RS10870	2132237	2132254	forward	TAGTTATTTTCGTAACAT	18	4	1
TTGTTAANNNNTTAACAA	FAD-dependent oxidoreductase	TKVG1_09435	TKV_RS09115	1811750	1811767	forward	CTGTTAATAAAATAACAA	18	2	0
TTGTTAANNNNTTAACAA	sulfurtransferase TusA family protein	TKVG1_00430	TKV_RS00425	90103	90120	forward	ATGTTAAAAATATAACAA	18	2	0
TTGTTAANNNNTTAACAA	rexA	TKVG1_08155	TKV_RS02645	1549605	1549622	reverse	TTGACAAAAAATTTACAT	18	4	2

## Sheet: Table S6
Table S6. Mutations identified with whole genome sequencing in wild type and polC (C629Y) at transfer 1 and transfer 30
Source.Name	Name	Minimum	Maximum	Length	Change	Coverage	Polymorphism Type	Variant Frequency	Variant P-Value (approximate)
c1-polc1, 35%, cov 100, all mutations.csv	A	2103351	2103351	1	C -> A	137	SNP (transversion)	35.0%	2.4e-130
c1-polc1, 35%, cov 100, all mutations.csv	A	2103366	2103366	1	G -> A	138	SNP (transition)	55.1%	2.9e-233
c1-polc1, 35%, cov 100, all mutations.csv	AA	2103368	2103369	2	TT -> AA	138	Substitution	57.2%	1.7e-236
c1-polc1, 35%, cov 100, all mutations.csv	CA	2103371	2103372	2	TT -> CA	144	Substitution	63.9% -> 64.6%	5.4e-282
c1-polc1, 35%, cov 100, all mutations.csv	A	2103375	2103375	1	C -> A	150	SNP (transversion)	66.7%	2e-299
c1-polc1, 35%, cov 100, all mutations.csv		2101884	2101884	1	-C	175	Deletion	38.9%	4.5e-127
c1-polc1, 35%, cov 100, all mutations.csv	TT	2101851	2101852	2	AA -> TT	180	Substitution	82.2%	0
c1-polc1, 35%, cov 100, all mutations.csv	CCATG	2101876	2101875	0	+CCATG	181	Insertion	35.4%	1.1e-154
c1-polc1, 35%, cov 100, all mutations.csv	C	2101873	2101873	1	T -> C	185	SNP (transition)	54.6%	4.1e-299
c1-polc1, 35%, cov 100, all mutations.csv	T	2101877	2101877	1	A -> T	187	SNP (transversion)	35.3%	7.4e-153
c1-polc1, 35%, cov 100, all mutations.csv	T	2101856	2101856	1	C -> T	201	SNP (transition)	71.1%	0
c1-polc1, 35%, cov 100, all mutations.csv	G	2101854	2101854	1	C -> G	202	SNP (transversion)	71.8%	0
c1-polc1, 35%, cov 100, all mutations.csv	TC	2101858	2101859	2	GA -> TC	204	Substitution	69.6%	0
c1-polc1, 35%, cov 100, all mutations.csv	C	2101870	2101870	1	A -> C	210	SNP (transversion)	61.0%	0
c1-polc1, 35%, cov 100, all mutations.csv	T	2101824	2101824	1	C -> T	261	SNP (transition)	100.0%	0
c1-polc1, 35%, cov 100, all mutations.csv	GC	2101817	2101818	2	AT -> GC	270	Substitution	100.0%	0
c1-polc1, 35%, cov 100, all mutations.csv	A	2101816	2101815	0	+A	279	Insertion	100.0%	0
c1-polc1, 35%, cov 100, all mutations.csv	T	92029	92029	1	A -> T	320	SNP (transversion)	69.1%	0
c1-polc1, 35%, cov 100, all mutations.csv	G	92033	92033	1	T -> G	321	SNP (transversion)	70.1%	0
c1-polc1, 35%, cov 100, all mutations.csv	A	92032	92032	1	T -> A	324	SNP (transversion)	99.4%	0
c1-polc1, 35%, cov 100, all mutations.csv	A	92008	92008	1	T -> A	326	SNP (transversion)	73.6%	0
c1-polc1, 35%, cov 100, all mutations.csv	T	92009	92009	1	C -> T	326	SNP (transition)	47.5%	0
c1-polc1, 35%, cov 100, all mutations.csv	G	92017	92017	1	C -> G	329	SNP (transversion)	62.6%	0
c1-polc1, 35%, cov 100, all mutations.csv	T	92017	92017	1	C -> T	329	SNP (transition)	37.4%	0
c1-polc1, 35%, cov 100, all mutations.csv	C	92016	92016	1	T -> C	331	SNP (transition)	37.5%	0
c1-polc1, 35%, cov 100, all mutations.csv	C	92018	92018	1	A -> C	332	SNP (transversion)	63.0%	0
c1-polc1, 35%, cov 100, all mutations.csv	T	92018	92018	1	A -> T	332	SNP (transversion)	36.7%	0
c1-polc1, 35%, cov 100, all mutations.csv	G	92024	92024	1	T -> G	332	SNP (transversion)	64.5%	0
c1-polc1, 35%, cov 100, all mutations.csv	A	92025	92025	1	T -> A	332	SNP (transversion)	35.2%	0
c1-polc1, 35%, cov 100, all mutations.csv	A	92007	92007	1	G -> A	333	SNP (transition)	50.8%	0
c1-polc1, 35%, cov 100, all mutations.csv	G	92019	92019	1	A -> G	334	SNP (transition)	36.5%	0
c1-polc1, 35%, cov 100, all mutations.csv	T	92019	92019	1	A -> T	334	SNP (transversion)	63.2%	0
c1-polc1, 35%, cov 100, all mutations.csv	G	92015	92015	1	T -> G	347	SNP (transversion)	100.0%	0
c1-polc1, 35%, cov 100, all mutations.csv	A	90106	90106	1	T -> A	479	SNP (transversion)	49.7%	0
c1-polc1, 35%, cov 100, all mutations.csv		1326304	1326305	2	(TT)9 -> (TT)8	485	Deletion (tandem repeat)	96.9%	0
c1-polc1, 35%, cov 100, all mutations.csv	A	90113	90113	1	T -> A	486	SNP (transversion)	46.9%	0
c1-polc1, 35%, cov 100, all mutations.csv	GGTTAGTTGT	90089	90088	0	+GGTTAGTTGT	544	Insertion	48.9%	0
c1-polc1, 35%, cov 100, all mutations.csv	A	828580	828580	1	T -> A	544	SNP (transversion)	100.0%	0
c1-polc1, 35%, cov 100, all mutations.csv	A	828588	828588	1	G -> A	544	SNP (transition)	100.0%	0
c1-polc1, 35%, cov 100, all mutations.csv	T	90094	90094	1	A -> T	547	SNP (transversion)	48.8%	0
c1-polc1, 35%, cov 100, all mutations.csv	G	1899014	1899014	1	C -> G	561	SNP (transversion)	98.4%	0
c1-polc1, 35%, cov 100, all mutations.csv	G	110469	110469	1	C -> G	565	SNP (transversion)	99.8%	0
c1-polc1, 35%, cov 100, all mutations.csv	G	1655492	1655492	1	C -> G	580	SNP (transversion)	99.8%	0
c1-polc1, 35%, cov 100, all mutations.csv	T	828598	828598	1	A -> T	584	SNP (transversion)	100.0%	0
c1-polc1, 35%, cov 100, all mutations.csv	C	421846	421846	1	G -> C	593	SNP (transversion)	100.0%	0
c1-polc1, 35%, cov 100, all mutations.csv	T	1371873	1371873	1	C -> T	593	SNP (transition)	99.8%	0
c1-polc1, 35%, cov 100, all mutations.csv	A	1380859	1380858	0	(A)6 -> (A)7	604	Insertion (tandem repeat)	100.0%	0
c1-polc1, 35%, cov 100, all mutations.csv	A	2342634	2342634	1	T -> A	624	SNP (transversion)	99.8%	0
c1-polc1, 35%, cov 100, all mutations.csv	C	1197634	1197634	1	T -> C	630	SNP (transition)	100.0%	0
c1-polc1, 35%, cov 100, all mutations.csv	C	1474120	1474120	1	T -> C	639	SNP (transition)	100.0%	0
c1-polc1, 35%, cov 100, all mutations.csv	T	675748	675748	1	C -> T	646	SNP (transition)	99.8%	0
c1-polc1, 35%, cov 100, all mutations.csv	G	1974770	1974770	1	C -> G	647	SNP (transversion)	100.0%	0
c1-polc1, 35%, cov 100, all mutations.csv	T	1381039	1381039	1	A -> T	653	SNP (transversion)	100.0%	0
c1-polc1, 35%, cov 100, all mutations.csv	A	2131405	2131405	1	T -> A	654	SNP (transversion)	89.0%	0
c1-polc1, 35%, cov 100, all mutations.csv	T	341995	341995	1	C -> T	655	SNP (transition)	99.7%	0
c1-polc1, 35%, cov 100, all mutations.csv	C	475877	475877	1	G -> C	665	SNP (transversion)	99.8%	0
c1-polc1, 35%, cov 100, all mutations.csv	T	225748	225748	1	A -> T	670	SNP (transversion)	100.0%	0
c1-polc1, 35%, cov 100, all mutations.csv	A	1344134	1344134	1	G -> A	676	SNP (transition)	100.0%	0
c1-polc1, 35%, cov 100, all mutations.csv	C	655712	655712	1	G -> C	680	SNP (transversion)	100.0%	0
c1-polc1, 35%, cov 100, all mutations.csv	T	1963781	1963781	1	A -> T	725	SNP (transversion)	98.9%	5.6e-199
c1-polc1, 35%, cov 100, all mutations.csv	ATAAA	2103353	2103357	5	GGGGT -> ATAAA	127 -> 134	Substitution	35.1% -> 37.8%	4.1e-131
c1-polc1, 35%, cov 100, all mutations.csv	CATCAA	2103359	2103364	6	GTCTCT -> CATCAA	132 -> 141	Substitution	43.5% -> 53.0%	7.2e-176
c1-polc1, 35%, cov 100, all mutations.csv	TAC	2103377	2103379	3	CTT -> TAC	167 -> 168	Substitution	69.5% -> 70.2%	0
c1-polc1, 35%, cov 100, all mutations.csv	TT	2101889	2101890	2	CA -> TT	169 -> 170	Substitution	38.5% -> 38.8%	4.8e-173
c1-polc1, 35%, cov 100, all mutations.csv	TTTAT	2103402	2103406	5	CACTA -> TTTAT	171 -> 200	Substitution	83.4% -> 97.7%	0
c1-polc1, 35%, cov 100, all mutations.csv	CCGT	2103384	2103387	4	AATC -> CCGT	178 -> 182	Substitution	73.0% -> 76.9%	0
c1-polc1, 35%, cov 100, all mutations.csv	AGATTGTCAACA	2103389	2103400	12	TACGATAATTTT -> AGATTGTCAACA	181 -> 198	Substitution	77.3% -> 81.8%	0
c1-polc1, 35%, cov 100, all mutations.csv	GTTTT	2101845	2101849	5	TAAGA -> GTTTT	183 -> 194	Substitution	83.6% -> 86.1%	0
c1-polc1, 35%, cov 100, all mutations.csv	GGTTA	2101863	2101867	5	TTAGT -> GGTTA	204 -> 207	Substitution	64.3% -> 67.6%	0
c1-polc1, 35%, cov 100, all mutations.csv	TACC	2101838	2101841	4	ATTT -> TACC	205 -> 223	Substitution	86.8% -> 88.3%	0
c1-polc1, 35%, cov 100, all mutations.csv	AACACA	2101831	2101836	6	CTGTAG -> AACACA	225 -> 254	Substitution	89.3% -> 91.7%	0
c1-polc1, 35%, cov 100, all mutations.csv	CAG	2101826	2101828	3	AGA -> CAG	261 -> 263	Substitution	96.6% -> 98.1%	0
c1-polc1, 35%, cov 100, all mutations.csv	AA	2101820	2101821	2	GT -> AA	263 -> 265	Substitution	99.6%	0
c1-polc1, 35%, cov 100, all mutations.csv	CCA	92020	92022	3	TTT -> CCA	332 -> 334	Substitution	35.5% -> 36.3%	0
c1-polc1, 35%, cov 100, all mutations.csv	GGA	92011	92013	3	CTC -> GGA	340 -> 345	Substitution	42.6% -> 45.3%	0
c1-polc1, 35%, cov 100, all mutations.csv	GAG	92002	92004	3	TTT -> GAG	351 -> 354	Substitution	52.1% -> 52.8%	0
c1-polc1, 35%, cov 100, all mutations.csv	GTGAAAATC	90126	90134	9	AGAGGTGAA -> GTGAAAATC	473 -> 483	Substitution	36.8% -> 41.8%	0
c1-polc1, 35%, cov 100, all mutations.csv	GA	90117	90118	2	AC -> GA	475 -> 478	Substitution	44.8% -> 45.4%	0
c1-polc1, 35%, cov 100, all mutations.csv	CCA	90121	90123	3	AAT -> CCA	475 -> 479	Substitution	42.9% -> 44.4%	0
c1-polc1, 35%, cov 100, all mutations.csv	GT	90137	90138	2	AA -> GT	481 -> 482	Substitution	35.3% -> 35.5%	0
c1-polc1, 35%, cov 100, all mutations.csv	CA	90103	90104	2	AT -> CA	489 -> 491	Substitution	49.3% -> 49.7%	0
c1-polc1, 35%, cov 100, all mutations.csv	GC	90099	90100	2	TG -> GC	518 -> 524	Substitution	49.0% -> 49.6%	0
c1-polc1, 35%, cov 100, all mutations.csv	TTTT	2117451	2117450	0	(TT)8 -> (TT)10	619 -> 647	Insertion (tandem repeat)	93.5% -> 93.7%	0
c1-polc2, 35%, cov 100, allmutations.csv	AA	2103368	2103369	2	TT -> AA	117	Substitution	59.0%	5.8e-208
c1-polc2, 35%, cov 100, allmutations.csv	A	2103375	2103375	1	C -> A	119	SNP (transversion)	70.6%	1.6e-263
c1-polc2, 35%, cov 100, allmutations.csv	A	2103351	2103351	1	C -> A	121	SNP (transversion)	35.5%	7.2e-113
c1-polc2, 35%, cov 100, allmutations.csv	A	2103366	2103366	1	G -> A	121	SNP (transition)	56.2%	7.5e-203
c1-polc2, 35%, cov 100, allmutations.csv	C	2101827	2101827	1	G -> C	152	SNP (transversion)	80.3%	0
c1-polc2, 35%, cov 100, allmutations.csv	A	1344134	1344134	1	G -> A	332	SNP (transition)	99.7%	0
c1-polc2, 35%, cov 100, allmutations.csv	A	92008	92008	1	T -> A	339	SNP (transversion)	44.0%	0
c1-polc2, 35%, cov 100, allmutations.csv	C	92008	92008	1	T -> C	339	SNP (transition)	56.0%	0
c1-polc2, 35%, cov 100, allmutations.csv	G	91993	91993	1	T -> G	340	SNP (transversion)	40.3%	0
c1-polc2, 35%, cov 100, allmutations.csv	G	92002	92002	1	T -> G	350	SNP (transversion)	48.9%	0
c1-polc2, 35%, cov 100, allmutations.csv	T	92009	92009	1	C -> T	357	SNP (transition)	41.7%	0
c1-polc2, 35%, cov 100, allmutations.csv		92011	92011	1	-C	357	Deletion	100.0%	0
c1-polc2, 35%, cov 100, allmutations.csv	G	92024	92024	1	T -> G	359	SNP (transversion)	65.5%	0
c1-polc2, 35%, cov 100, allmutations.csv	A	92012	92012	1	T -> A	365	SNP (transversion)	59.2%	0
c1-polc2, 35%, cov 100, allmutations.csv	G	92012	92012	1	T -> G	365	SNP (transversion)	40.5%	0
c1-polc2, 35%, cov 100, allmutations.csv	G	92021	92021	1	T -> G	365	SNP (transversion)	35.1%	0
c1-polc2, 35%, cov 100, allmutations.csv	G	92015	92015	1	T -> G	366	SNP (transversion)	60.9%	0
c1-polc2, 35%, cov 100, allmutations.csv		92015	92015	1	(T)3 -> (T)2	366	Deletion (tandem repeat)	35.5%	7.8e-262
c1-polc2, 35%, cov 100, allmutations.csv	A	92032	92032	1	T -> A	366	SNP (transversion)	70.2%	0
c1-polc2, 35%, cov 100, allmutations.csv	GA	92013	92014	2	CT -> GA	367	Substitution	39.8% -> 40.1%	0
c1-polc2, 35%, cov 100, allmutations.csv	G	92033	92033	1	T -> G	367	SNP (transversion)	100.0%	0
c1-polc2, 35%, cov 100, allmutations.csv	T	92029	92029	1	A -> T	375	SNP (transversion)	68.0%	0
c1-polc2, 35%, cov 100, allmutations.csv	A	90106	90106	1	T -> A	414	SNP (transversion)	43.5%	0
c1-polc2, 35%, cov 100, allmutations.csv	A	90113	90113	1	T -> A	427	SNP (transversion)	40.5%	0
c1-polc2, 35%, cov 100, allmutations.csv	T	1371873	1371873	1	C -> T	437	SNP (transition)	100.0%	0
c1-polc2, 35%, cov 100, allmutations.csv	GGTTAGTTGT	90089	90088	0	+GGTTAGTTGT	449	Insertion	43.0%	0
c1-polc2, 35%, cov 100, allmutations.csv	T	90094	90094	1	A -> T	449	SNP (transversion)	43.2%	0
c1-polc2, 35%, cov 100, allmutations.csv		1326304	1326305	2	(TT)9 -> (TT)8	465	Deletion (tandem repeat)	97.2%	0
c1-polc2, 35%, cov 100, allmutations.csv	T	225748	225748	1	A -> T	473	SNP (transversion)	100.0%	0
c1-polc2, 35%, cov 100, allmutations.csv	A	828580	828580	1	T -> A	493	SNP (transversion)	100.0%	0
c1-polc2, 35%, cov 100, allmutations.csv	A	828588	828588	1	G -> A	498	SNP (transition)	100.0%	0
c1-polc2, 35%, cov 100, allmutations.csv	G	1899014	1899014	1	C -> G	509	SNP (transversion)	99.0%	0
c1-polc2, 35%, cov 100, allmutations.csv	C	1197634	1197634	1	T -> C	518	SNP (transition)	100.0%	0
c1-polc2, 35%, cov 100, allmutations.csv	T	828598	828598	1	A -> T	522	SNP (transversion)	99.8%	0
c1-polc2, 35%, cov 100, allmutations.csv	A	2342634	2342634	1	T -> A	557	SNP (transversion)	99.8%	0
c1-polc2, 35%, cov 100, allmutations.csv	G	1655492	1655492	1	C -> G	589	SNP (transversion)	100.0%	0
c1-polc2, 35%, cov 100, allmutations.csv	C	1474120	1474120	1	T -> C	599	SNP (transition)	100.0%	0
c1-polc2, 35%, cov 100, allmutations.csv	C	421846	421846	1	G -> C	601	SNP (transversion)	100.0%	0
c1-polc2, 35%, cov 100, allmutations.csv	G	110469	110469	1	C -> G	614	SNP (transversion)	100.0%	0
c1-polc2, 35%, cov 100, allmutations.csv	C	655712	655712	1	G -> C	615	SNP (transversion)	100.0%	0
c1-polc2, 35%, cov 100, allmutations.csv	G	1974770	1974770	1	C -> G	627	SNP (transversion)	100.0%	0
c1-polc2, 35%, cov 100, allmutations.csv	T	341995	341995	1	C -> T	635	SNP (transition)	99.4%	0
c1-polc2, 35%, cov 100, allmutations.csv	A	1380859	1380858	0	(A)6 -> (A)7	647	Insertion (tandem repeat)	99.8%	0
c1-polc2, 35%, cov 100, allmutations.csv	C	475877	475877	1	G -> C	664	SNP (transversion)	100.0%	0
c1-polc2, 35%, cov 100, allmutations.csv	T	1381039	1381039	1	A -> T	682	SNP (transversion)	99.7%	0
c1-polc2, 35%, cov 100, allmutations.csv	T	1963781	1963781	1	A -> T	842	SNP (transversion)	99.5%	5.1e-242
c1-polc2, 35%, cov 100, allmutations.csv	T	675748	675748	1	C -> T	910	SNP (transition)	98.5%	0
c1-polc2, 35%, cov 100, allmutations.csv	A	2131405	2131405	1	T -> A	930	SNP (transversion)	91.4%	0
c1-polc2, 35%, cov 100, allmutations.csv	GTTT	2101846	2101849	4	AAGA -> GTTT	102 -> 106	Substitution	40.2% -> 47.2%	1.4e-118
c1-polc2, 35%, cov 100, allmutations.csv	ACC	2101840	2101842	3	TTT -> ACC	111 -> 125	Substitution	52.3% -> 58.4%	6.8e-159
c1-polc2, 35%, cov 100, allmutations.csv	CATCAA	2103359	2103364	6	GTCTCT -> CATCAA	118 -> 125	Substitution	47.2% -> 55.8%	9.8e-176
c1-polc2, 35%, cov 100, allmutations.csv	CA	2103371	2103372	2	TT -> CA	119 -> 120	Substitution	65.8% -> 66.4%	7e-244
c1-polc2, 35%, cov 100, allmutations.csv	ATAAA	2103353	2103357	5	GGGGT -> ATAAA	119 -> 128	Substitution	39.1% -> 42.9%	5.2e-135
c1-polc2, 35%, cov 100, allmutations.csv	CAG	2101836	2101838	3	GGA -> CAG	129 -> 146	Substitution	59.7% -> 65.8%	1.3e-232
c1-polc2, 35%, cov 100, allmutations.csv	TAC	2103377	2103379	3	CTT -> TAC	130 -> 131	Substitution	73.1% -> 74.0%	0
c1-polc2, 35%, cov 100, allmutations.csv	TTTAT	2103402	2103406	5	CACTA -> TTTAT	132 -> 155	Substitution	82.6% -> 97.7%	0
c1-polc2, 35%, cov 100, allmutations.csv	AGGCAAAGTT	2101816	2101825	10	GATAGTGTCA -> AGGCAAAGTT	134 -> 150	Substitution	82.6% -> 97.2%	0
c1-polc2, 35%, cov 100, allmutations.csv	CCGT	2103384	2103387	4	AATC -> CCGT	139 -> 142	Substitution	76.3% -> 77.3%	0
c1-polc2, 35%, cov 100, allmutations.csv	AGATTGTCAACA	2103389	2103400	12	TACGATAATTTT -> AGATTGTCAACA	141 -> 153	Substitution	77.3% -> 80.4%	0
c1-polc2, 35%, cov 100, allmutations.csv	GTAAAC	2101829	2101834	6	TACTGT -> GTAAAC	145 -> 154	Substitution	68.9% -> 77.9%	0
c1-polc2, 35%, cov 100, allmutations.csv	AA	92005	92007	3	CTG -> AA	336 -> 347	Deletion	49.3% -> 51.9%	0
c1-polc2, 35%, cov 100, allmutations.csv	AG	92003	92004	2	TT -> AG	348 -> 349	Substitution	97.1% -> 97.7%	0
c1-polc2, 35%, cov 100, allmutations.csv	GCT	92017	92019	3	CAA -> GCT	355 -> 366	Substitution	99.7%	0
c1-polc2, 35%, cov 100, allmutations.csv	CA	90103	90104	2	AT -> CA	416 -> 417	Substitution	43.3% -> 43.4%	0
c1-polc2, 35%, cov 100, allmutations.csv	GA	90117	90118	2	AC -> GA	422 -> 423	Substitution	37.7% -> 38.1%	0
c1-polc2, 35%, cov 100, allmutations.csv	CCA	90121	90123	3	AAT -> CCA	423 -> 430	Substitution	35.6% -> 37.1%	0
c1-polc2, 35%, cov 100, allmutations.csv	GC	90099	90100	2	TG -> GC	429 -> 434	Substitution	42.9% -> 43.1%	0
c1-polc2, 35%, cov 100, allmutations.csv	TTTATA	90070	90075	6	AGAGCG -> TTTATA	435 -> 441	Substitution	35.8% -> 37.8%	0
c1-polc2, 35%, cov 100, allmutations.csv	TTT	2117451	2117450	0	(TTT)5 -> (TTT)6	553 -> 559	Insertion (tandem repeat)	97.5%	0
c1-wt1, 35%, cov 100, allmutations.csv	G	2101855	2101855	1	C -> G	132	SNP (transversion)	48.5%	3.5e-185
c1-wt1, 35%, cov 100, allmutations.csv	C	2101871	2101871	1	T -> C	132	SNP (transition)	36.4%	4.2e-136
c1-wt1, 35%, cov 100, allmutations.csv	A	2103366	2103366	1	G -> A	140	SNP (transition)	60.7%	3.7e-266
c1-wt1, 35%, cov 100, allmutations.csv	A	2103375	2103375	1	C -> A	143	SNP (transversion)	70.6%	1.1e-306
c1-wt1, 35%, cov 100, allmutations.csv	C	2101827	2101827	1	G -> C	205	SNP (transversion)	79.5%	0
c1-wt1, 35%, cov 100, allmutations.csv	G	91984	91984	1	A -> G	370	SNP (transition)	37.3%	0
c1-wt1, 35%, cov 100, allmutations.csv	T	91981	91981	1	G -> T	371	SNP (transversion)	36.7%	0
c1-wt1, 35%, cov 100, allmutations.csv	G	91996	91996	1	A -> G	371	SNP (transition)	35.0%	0
c1-wt1, 35%, cov 100, allmutations.csv	G	91993	91993	1	T -> G	373	SNP (transversion)	42.9%	0
c1-wt1, 35%, cov 100, allmutations.csv	A	92008	92008	1	T -> A	375	SNP (transversion)	100.0%	0
c1-wt1, 35%, cov 100, allmutations.csv	G	92002	92002	1	T -> G	376	SNP (transversion)	47.3%	0
c1-wt1, 35%, cov 100, allmutations.csv	T	92009	92009	1	C -> T	376	SNP (transition)	41.2%	0
c1-wt1, 35%, cov 100, allmutations.csv	C	92010	92010	1	T -> C	395	SNP (transition)	60.5%	0
c1-wt1, 35%, cov 100, allmutations.csv	G	92011	92011	1	C -> G	396	SNP (transversion)	39.4%	0
c1-wt1, 35%, cov 100, allmutations.csv	T	92011	92011	1	C -> T	396	SNP (transition)	60.6%	0
c1-wt1, 35%, cov 100, allmutations.csv	C	92016	92016	1	T -> C	398	SNP (transition)	35.7%	0
c1-wt1, 35%, cov 100, allmutations.csv	A	92012	92012	1	T -> A	401	SNP (transversion)	61.8%	0
c1-wt1, 35%, cov 100, allmutations.csv	G	92012	92012	1	T -> G	401	SNP (transversion)	38.2%	0
c1-wt1, 35%, cov 100, allmutations.csv	T	92029	92029	1	A -> T	401	SNP (transversion)	71.3%	0
c1-wt1, 35%, cov 100, allmutations.csv	G	92033	92033	1	T -> G	402	SNP (transversion)	71.9%	0
c1-wt1, 35%, cov 100, allmutations.csv	A	92032	92032	1	T -> A	404	SNP (transversion)	100.0%	0
c1-wt1, 35%, cov 100, allmutations.csv	A	92013	92013	1	C -> A	406	SNP (transversion)	37.7%	0
c1-wt1, 35%, cov 100, allmutations.csv	G	92015	92015	1	T -> G	408	SNP (transversion)	100.0%	0
c1-wt1, 35%, cov 100, allmutations.csv	G	92024	92024	1	T -> G	411	SNP (transversion)	67.2%	0
c1-wt1, 35%, cov 100, allmutations.csv		1326304	1326305	2	(TT)9 -> (TT)8	493	Deletion (tandem repeat)	95.9%	0
c1-wt1, 35%, cov 100, allmutations.csv	T	1381039	1381039	1	A -> T	517	SNP (transversion)	100.0%	0
c1-wt1, 35%, cov 100, allmutations.csv	A	1380859	1380858	0	(A)6 -> (A)7	575	Insertion (tandem repeat)	99.8%	0
c1-wt1, 35%, cov 100, allmutations.csv	G	110469	110469	1	C -> G	579	SNP (transversion)	100.0%	0
c1-wt1, 35%, cov 100, allmutations.csv	G	1119322	1119322	1	C -> G	592	SNP (transversion)	45.4%	0
c1-wt1, 35%, cov 100, allmutations.csv	T	262575	262575	1	G -> T	602	SNP (transversion)	37.9%	0
c1-wt1, 35%, cov 100, allmutations.csv	G	1974770	1974770	1	C -> G	627	SNP (transversion)	99.8%	0
c1-wt1, 35%, cov 100, allmutations.csv	T	341995	341995	1	C -> T	649	SNP (transition)	99.5%	0
c1-wt1, 35%, cov 100, allmutations.csv	A	2342634	2342634	1	T -> A	666	SNP (transversion)	99.8%	0
c1-wt1, 35%, cov 100, allmutations.csv	T	1963781	1963781	1	A -> T	684	SNP (transversion)	99.1%	8.6e-191
c1-wt1, 35%, cov 100, allmutations.csv	G	241357	241357	1	C -> G	766	SNP (transversion)	39.4%	0
c1-wt1, 35%, cov 100, allmutations.csv	ATATATAAA	2103349	2103357	9	CACAGGGGT -> ATATATAAA	122 -> 132	Substitution	43.9% -> 50.4%	6.8e-159
c1-wt1, 35%, cov 100, allmutations.csv	GTTTTCTT	2101846	2101853	8	AAGACAAC -> GTTTTCTT	125 -> 139	Substitution	50.8% -> 59.0%	2.7e-197
c1-wt1, 35%, cov 100, allmutations.csv	AT	2101868	2101869	2	TA -> AT	128 -> 129	Substitution	39.8% -> 40.3%	4.2e-147
c1-wt1, 35%, cov 100, allmutations.csv	ACGGT	2101862	2101866	5	CTTAG -> ACGGT	128 -> 133	Substitution	41.1% -> 45.1%	1.9e-148
c1-wt1, 35%, cov 100, allmutations.csv	TTC	2101858	2101860	3	GAA -> TTC	130 -> 132	Substitution	45.5% -> 46.6%	4.3e-175
c1-wt1, 35%, cov 100, allmutations.csv	CATCAA	2103359	2103364	6	GTCTCT -> CATCAA	133 -> 138	Substitution	52.6% -> 59.4%	6.1e-206
c1-wt1, 35%, cov 100, allmutations.csv	AA	2103368	2103369	2	TT -> AA	139 -> 140	Substitution	62.9% -> 63.3%	1.4e-277
c1-wt1, 35%, cov 100, allmutations.csv	CA	2103371	2103372	2	TT -> CA	141 -> 142	Substitution	67.4% -> 67.6%	1e-294
c1-wt1, 35%, cov 100, allmutations.csv	ACC	2101840	2101842	3	TTT -> ACC	147 -> 171	Substitution	61.9% -> 68.4%	5.6e-277
c1-wt1, 35%, cov 100, allmutations.csv	TAC	2103377	2103379	3	CTT -> TAC	154 -> 156	Substitution	72.7% -> 73.1%	0
c1-wt1, 35%, cov 100, allmutations.csv	CCGT	2103384	2103387	4	AATC -> CCGT	164 -> 169	Substitution	75.0% -> 78.9%	0
c1-wt1, 35%, cov 100, allmutations.csv	AGATTGTCAACA	2103389	2103400	12	TACGATAATTTT -> AGATTGTCAACA	164 -> 180	Substitution	78.7% -> 83.9%	0
c1-wt1, 35%, cov 100, allmutations.csv	TTTAT	2103402	2103406	5	CACTA -> TTTAT	170 -> 185	Substitution	87.9% -> 96.5%	0
c1-wt1, 35%, cov 100, allmutations.csv	CAG	2101836	2101838	3	GGA -> CAG	178 -> 195	Substitution	69.7% -> 73.8%	0
c1-wt1, 35%, cov 100, allmutations.csv	AGGCAAAGTT	2101816	2101825	10	GATAGTGTCA -> AGGCAAAGTT	181 -> 212	Substitution	80.0% -> 97.3%	0
c1-wt1, 35%, cov 100, allmutations.csv	GTAAAC	2101829	2101834	6	TACTGT -> GTAAAC	196 -> 208	Substitution	73.5% -> 77.4%	0
c1-wt1, 35%, cov 100, allmutations.csv	A	92005	92007	3	CTG -> A	361 -> 369	Deletion	53.7% -> 54.8%	0
c1-wt1, 35%, cov 100, allmutations.csv	TA	91990	91991	2	AG -> TA	365 -> 368	Substitution	35.1% -> 35.3%	0
c1-wt1, 35%, cov 100, allmutations.csv	AG	92003	92004	2	TT -> AG	374 -> 376	Substitution	99.5%	0
c1-wt1, 35%, cov 100, allmutations.csv	GCT	92017	92019	3	CAA -> GCT	398 -> 409	Substitution	64.8% -> 66.0%	0
c1-wt1, 35%, cov 100, allmutations.csv	TTTT	2117451	2117450	0	(TT)8 -> (TT)10	573 -> 601	Insertion (tandem repeat)	93.4% -> 93.6%	0
c1-wt2, 35%, cov 100, allmutations.csv		1326304	1326305	2	(TT)9 -> (TT)8	433	Deletion (tandem repeat)	95.2%	0
c1-wt2, 35%, cov 100, allmutations.csv	A	2103366	2103366	1	G -> A	166	SNP (transition)	56.0%	2.7e-286
c1-wt2, 35%, cov 100, allmutations.csv	A	2103375	2103375	1	C -> A	173	SNP (transversion)	69.4%	0
c1-wt2, 35%, cov 100, allmutations.csv	A	92008	92008	1	T -> A	316	SNP (transversion)	100.0%	0
c1-wt2, 35%, cov 100, allmutations.csv	A	92032	92032	1	T -> A	320	SNP (transversion)	99.7%	0
c1-wt2, 35%, cov 100, allmutations.csv	A	92012	92012	1	T -> A	329	SNP (transversion)	63.2%	0
c1-wt2, 35%, cov 100, allmutations.csv	A	92013	92013	1	C -> A	332	SNP (transversion)	36.4%	0
c1-wt2, 35%, cov 100, allmutations.csv	A	2342634	2342634	1	T -> A	612	SNP (transversion)	100.0%	0
c1-wt2, 35%, cov 100, allmutations.csv	A	1380859	1380858	0	(A)6 -> (A)7	613	Insertion (tandem repeat)	100.0%	0
c1-wt2, 35%, cov 100, allmutations.csv	A	92005	92007	3	CTG -> A	311 -> 329	Deletion	52.3% -> 55.3%	0
c1-wt2, 35%, cov 100, allmutations.csv	AA	2103368	2103369	2	TT -> AA	161	Substitution	59.0%	1.3e-295
c1-wt2, 35%, cov 100, allmutations.csv	ACC	2101840	2101842	3	TTT -> ACC	146 -> 164	Substitution	58.9% -> 65.2%	6.2e-254
c1-wt2, 35%, cov 100, allmutations.csv	AG	92003	92004	2	TT -> AG	334 -> 335	Substitution	99.1%	0
c1-wt2, 35%, cov 100, allmutations.csv	AGATTGTCAACA	2103389	2103400	12	TACGATAATTTT -> AGATTGTCAACA	207 -> 215	Substitution	79.7% -> 83.7%	0
c1-wt2, 35%, cov 100, allmutations.csv	AGGCAAAGTT	2101816	2101825	10	GATAGTGTCA -> AGGCAAAGTT	173 -> 206	Substitution	81.6% -> 100.0%	0
c1-wt2, 35%, cov 100, allmutations.csv	ATAAA	2103353	2103357	5	GGGGT -> ATAAA	158 -> 172	Substitution	36.6% -> 41.8%	4.8e-173
c1-wt2, 35%, cov 100, allmutations.csv	C	2101827	2101827	1	G -> C	197	SNP (transversion)	80.2%	0
c1-wt2, 35%, cov 100, allmutations.csv	C	92010	92010	1	T -> C	328	SNP (transition)	60.4%	0
c1-wt2, 35%, cov 100, allmutations.csv	CA	2103371	2103372	2	TT -> CA	167 -> 168	Substitution	66.5% -> 67.3%	0
c1-wt2, 35%, cov 100, allmutations.csv	CAG	2101836	2101838	3	GGA -> CAG	174 -> 187	Substitution	68.4% -> 72.2%	0
c1-wt2, 35%, cov 100, allmutations.csv	CATCAA	2103359	2103364	6	GTCTCT -> CATCAA	167 -> 173	Substitution	45.3% -> 53.3%	1.2e-229
c1-wt2, 35%, cov 100, allmutations.csv	CCGT	2103384	2103387	4	AATC -> CCGT	207 -> 208	Substitution	75.4% -> 77.4%	0
c1-wt2, 35%, cov 100, allmutations.csv	G	2101855	2101855	1	C -> G	147	SNP (transversion)	40.1%	1.6e-158
c1-wt2, 35%, cov 100, allmutations.csv	G	92033	92033	1	T -> G	319	SNP (transversion)	76.2%	0
c1-wt2, 35%, cov 100, allmutations.csv	G	92011	92011	1	C -> G	325	SNP (transversion)	38.2%	0
c1-wt2, 35%, cov 100, allmutations.csv	G	92024	92024	1	T -> G	328	SNP (transversion)	69.2%	0
c1-wt2, 35%, cov 100, allmutations.csv	G	92012	92012	1	T -> G	329	SNP (transversion)	36.8%	0
c1-wt2, 35%, cov 100, allmutations.csv	G	92002	92002	1	T -> G	333	SNP (transversion)	48.0%	0
c1-wt2, 35%, cov 100, allmutations.csv	G	92015	92015	1	T -> G	334	SNP (transversion)	100.0%	0
c1-wt2, 35%, cov 100, allmutations.csv	G	91993	91993	1	T -> G	351	SNP (transversion)	41.9%	0
c1-wt2, 35%, cov 100, allmutations.csv	G	110469	110469	1	C -> G	549	SNP (transversion)	100.0%	0
c1-wt2, 35%, cov 100, allmutations.csv	G	1119322	1119322	1	C -> G	550	SNP (transversion)	36.5%	0
c1-wt2, 35%, cov 100, allmutations.csv	G	2018645	2018645	1	C -> G	567	SNP (transversion)	36.2%	0
c1-wt2, 35%, cov 100, allmutations.csv	G	1974770	1974770	1	C -> G	604	SNP (transversion)	100.0%	0
c1-wt2, 35%, cov 100, allmutations.csv	G	241357	241357	1	C -> G	660	SNP (transversion)	40.5%	0
c1-wt2, 35%, cov 100, allmutations.csv	GCT	92017	92019	3	CAA -> GCT	319 -> 328	Substitution	67.1% -> 68.3%	0
c1-wt2, 35%, cov 100, allmutations.csv	GTAAAC	2101829	2101834	6	TACTGT -> GTAAAC	188 -> 200	Substitution	71.8% -> 79.3%	0
c1-wt2, 35%, cov 100, allmutations.csv	GTTTTCTT	2101846	2101853	8	AAGACAAC -> GTTTTCTT	127 -> 134	Substitution	46.6% -> 56.0%	5.4e-178
c1-wt2, 35%, cov 100, allmutations.csv	T	92009	92009	1	C -> T	315	SNP (transition)	41.3%	0
c1-wt2, 35%, cov 100, allmutations.csv	T	92029	92029	1	A -> T	319	SNP (transversion)	75.5%	0
c1-wt2, 35%, cov 100, allmutations.csv	T	92011	92011	1	C -> T	325	SNP (transition)	61.8%	0
c1-wt2, 35%, cov 100, allmutations.csv	T	1381039	1381039	1	A -> T	528	SNP (transversion)	99.8%	0
c1-wt2, 35%, cov 100, allmutations.csv	T	341995	341995	1	C -> T	581	SNP (transition)	99.7%	0
c1-wt2, 35%, cov 100, allmutations.csv	T	1963781	1963781	1	A -> T	697	SNP (transversion)	99.4%	7.6e-199
c1-wt2, 35%, cov 100, allmutations.csv	TAC	2103377	2103379	3	CTT -> TAC	192 -> 200	Substitution	72.4% -> 73.5%	0
c1-wt2, 35%, cov 100, allmutations.csv	TTC	2101858	2101860	3	GAA -> TTC	147 -> 148	Substitution	36.5% -> 37.4%	3.4e-151
c1-wt2, 35%, cov 100, allmutations.csv	TTTAT	2103402	2103406	5	CACTA -> TTTAT	184 -> 218	Substitution	83.8% -> 99.5%	0
c1-wt2, 35%, cov 100, allmutations.csv	TTTT	2117451	2117450	0	(TT)8 -> (TT)10	634 -> 664	Insertion (tandem repeat)	91.6% -> 91.9%	0
c30-polc1, 35%, cov 100, allmutations.csv		1326304	1326304	1	(T)19 -> (T)18	379	Deletion (tandem repeat)	46.7%	8.9e-260
c30-polc1, 35%, cov 100, allmutations.csv		1326305	1326305	1	(T)19 -> (T)18	353	Deletion (tandem repeat)	100.0%	0
c30-polc1, 35%, cov 100, allmutations.csv	A	90106	90106	1	T -> A	447	SNP (transversion)	48.5%	0
c30-polc1, 35%, cov 100, allmutations.csv	A	90113	90113	1	T -> A	456	SNP (transversion)	44.7%	0
c30-polc1, 35%, cov 100, allmutations.csv	A	92008	92008	1	T -> A	319	SNP (transversion)	100.0%	0
c30-polc1, 35%, cov 100, allmutations.csv	A	92032	92032	1	T -> A	339	SNP (transversion)	99.1%	0
c30-polc1, 35%, cov 100, allmutations.csv	A	533747	533747	1	T -> A	534	SNP (transversion)	36.1%	0
c30-polc1, 35%, cov 100, allmutations.csv	A	828580	828580	1	T -> A	505	SNP (transversion)	100.0%	0
c30-polc1, 35%, cov 100, allmutations.csv	A	828588	828588	1	G -> A	517	SNP (transition)	100.0%	0
c30-polc1, 35%, cov 100, allmutations.csv	A	1344134	1344134	1	G -> A	564	SNP (transition)	100.0%	0
c30-polc1, 35%, cov 100, allmutations.csv	A	1380859	1380858	0	(A)6 -> (A)7	586	Insertion (tandem repeat)	100.0%	0
c30-polc1, 35%, cov 100, allmutations.csv	A	2103366	2103366	1	G -> A	161	SNP (transition)	50.9%	1.7e-239
c30-polc1, 35%, cov 100, allmutations.csv	A	2103375	2103375	1	C -> A	163	SNP (transversion)	62.0%	3.3e-287
c30-polc1, 35%, cov 100, allmutations.csv	A	2131405	2131405	1	T -> A	539	SNP (transversion)	99.8%	0
c30-polc1, 35%, cov 100, allmutations.csv	A	2342634	2342634	1	T -> A	543	SNP (transversion)	100.0%	0
c30-polc1, 35%, cov 100, allmutations.csv	AA	2103368	2103369	2	TT -> AA	160 -> 161	Substitution	53.4% -> 53.8%	1.7e-248
c30-polc1, 35%, cov 100, allmutations.csv	ACC	2101840	2101842	3	TTT -> ACC	155 -> 167	Substitution	39.4% -> 45.5%	6.4e-145
c30-polc1, 35%, cov 100, allmutations.csv	AGATTGTCAACA	2103389	2103400	12	TACGATAATTTT -> AGATTGTCAACA	189 -> 200	Substitution	74.4% -> 83.1%	0
c30-polc1, 35%, cov 100, allmutations.csv	AGGCAAAGTT	2101816	2101825	10	GATAGTGTCA -> AGGCAAAGTT	174 -> 192	Substitution	70.2% -> 83.2%	0
c30-polc1, 35%, cov 100, allmutations.csv	C	421846	421846	1	G -> C	530	SNP (transversion)	100.0%	0
c30-polc1, 35%, cov 100, allmutations.csv	C	475877	475877	1	G -> C	660	SNP (transversion)	99.8%	0
c30-polc1, 35%, cov 100, allmutations.csv	C	655712	655712	1	G -> C	609	SNP (transversion)	100.0%	0
c30-polc1, 35%, cov 100, allmutations.csv	C	1197634	1197634	1	T -> C	516	SNP (transition)	100.0%	0
c30-polc1, 35%, cov 100, allmutations.csv	C	1474120	1474120	1	T -> C	574	SNP (transition)	100.0%	0
c30-polc1, 35%, cov 100, allmutations.csv	C	2101827	2101827	1	G -> C	190	SNP (transversion)	69.5%	0
c30-polc1, 35%, cov 100, allmutations.csv	CA	90103	90104	2	AT -> CA	458 -> 463	Substitution	46.0% -> 46.5%	0
c30-polc1, 35%, cov 100, allmutations.csv	CA	2103371	2103372	2	TT -> CA	163	Substitution	58.9%	2.1e-279
c30-polc1, 35%, cov 100, allmutations.csv	CAG	2101836	2101838	3	GGA -> CAG	174 -> 181	Substitution	47.7% -> 51.9%	7.3e-231
c30-polc1, 35%, cov 100, allmutations.csv	CATCAA	2103359	2103364	6	GTCTCT -> CATCAA	153 -> 161	Substitution	35.7% -> 49.1%	4.3e-158
c30-polc1, 35%, cov 100, allmutations.csv	CCA	90121	90123	3	AAT -> CCA	451 -> 459	Substitution	39.2% -> 41.7%	0
c30-polc1, 35%, cov 100, allmutations.csv	CCGT	2103384	2103387	4	AATC -> CCGT	197 -> 199	Substitution	71.1% -> 74.1%	0
c30-polc1, 35%, cov 100, allmutations.csv	CTA	92010	92012	3	TCT -> CTA	335 -> 338	Substitution	70.2% -> 71.6%	0
c30-polc1, 35%, cov 100, allmutations.csv	G	91984	91984	1	A -> G	290	SNP (transition)	35.5%	2.5e-269
c30-polc1, 35%, cov 100, allmutations.csv	G	92015	92015	1	T -> G	341	SNP (transversion)	100.0%	0
c30-polc1, 35%, cov 100, allmutations.csv	G	92024	92024	1	T -> G	339	SNP (transversion)	77.9%	0
c30-polc1, 35%, cov 100, allmutations.csv	G	92033	92033	1	T -> G	337	SNP (transversion)	82.5%	0
c30-polc1, 35%, cov 100, allmutations.csv	G	110469	110469	1	C -> G	560	SNP (transversion)	99.6%	0
c30-polc1, 35%, cov 100, allmutations.csv	G	1655492	1655492	1	C -> G	582	SNP (transversion)	100.0%	0
c30-polc1, 35%, cov 100, allmutations.csv	G	1899014	1899014	1	C -> G	553	SNP (transversion)	98.2%	0
c30-polc1, 35%, cov 100, allmutations.csv	G	1974770	1974770	1	C -> G	572	SNP (transversion)	100.0%	0
c30-polc1, 35%, cov 100, allmutations.csv	G	2101846	2101846	1	A -> G	151	SNP (transition)	37.7%	1.2e-162
c30-polc1, 35%, cov 100, allmutations.csv	GA	90117	90118	2	AC -> GA	451 -> 453	Substitution	41.7% -> 42.4%	0
c30-polc1, 35%, cov 100, allmutations.csv	GA	92006	92007	2	TG -> GA	317 -> 320	Substitution	66.6% -> 66.9%	0
c30-polc1, 35%, cov 100, allmutations.csv	GAG	92002	92004	3	TTT -> GAG	317 -> 322	Substitution	35.1% -> 36.0%	0
c30-polc1, 35%, cov 100, allmutations.csv	GC	90099	90100	2	TG -> GC	480 -> 483	Substitution	45.6% -> 46.0%	0
c30-polc1, 35%, cov 100, allmutations.csv	GCT	92017	92019	3	CAA -> GCT	332 -> 338	Substitution	75.0% -> 75.7%	0
c30-polc1, 35%, cov 100, allmutations.csv	GGTTAGTTGT	90089	90088	0	+GGTTAGTTGT	507	Insertion	44.0%	0
c30-polc1, 35%, cov 100, allmutations.csv	GTAAAC	2101829	2101834	6	TACTGT -> GTAAAC	179 -> 190	Substitution	54.3% -> 66.3%	5.3e-296
c30-polc1, 35%, cov 100, allmutations.csv	GTGAAAA	90126	90132	7	AGAGGTG -> GTGAAAA	438 -> 450	Substitution	34.8% -> 37.8%	0
c30-polc1, 35%, cov 100, allmutations.csv	T	90094	90094	1	A -> T	507	SNP (transversion)	45.2%	0
c30-polc1, 35%, cov 100, allmutations.csv	T	91981	91981	1	G -> T	288	SNP (transversion)	35.1%	2.4e-253
c30-polc1, 35%, cov 100, allmutations.csv	T	92029	92029	1	A -> T	337	SNP (transversion)	80.1%	0
c30-polc1, 35%, cov 100, allmutations.csv	T	225748	225748	1	A -> T	561	SNP (transversion)	100.0%	0
c30-polc1, 35%, cov 100, allmutations.csv	T	341995	341995	1	C -> T	553	SNP (transition)	99.5%	0
c30-polc1, 35%, cov 100, allmutations.csv	T	675748	675748	1	C -> T	528	SNP (transition)	99.8%	0
c30-polc1, 35%, cov 100, allmutations.csv	T	828598	828598	1	A -> T	539	SNP (transversion)	99.6%	0
c30-polc1, 35%, cov 100, allmutations.csv	T	1371873	1371873	1	C -> T	549	SNP (transition)	100.0%	0
c30-polc1, 35%, cov 100, allmutations.csv	T	1381039	1381039	1	A -> T	534	SNP (transversion)	100.0%	0
c30-polc1, 35%, cov 100, allmutations.csv	T	1963781	1963781	1	A -> T	579	SNP (transversion)	98.4%	3.7e-154
c30-polc1, 35%, cov 100, allmutations.csv	TAC	2103377	2103379	3	CTT -> TAC	178 -> 183	Substitution	64.6% -> 66.1%	0
c30-polc1, 35%, cov 100, allmutations.csv	TTTAT	2103402	2103406	5	CACTA -> TTTAT	168 -> 192	Substitution	85.4% -> 98.2%	0
c30-polc1, 35%, cov 100, allmutations.csv	TTTT	2117451	2117450	0	(TT)8 -> (TT)10	555 -> 595	Insertion (tandem repeat)	93.4% -> 93.5%	0
c30-polc2, 35%, cov 100, allmutations.csv		92011	92011	1	-C	385	Deletion	100.0%	0
c30-polc2, 35%, cov 100, allmutations.csv		1326304	1326305	2	(TT)9 -> (TT)8	465	Deletion (tandem repeat)	96.6%	0
c30-polc2, 35%, cov 100, allmutations.csv		2271272	2271272	1	-G	537	Deletion	100.0%	0
c30-polc2, 35%, cov 100, allmutations.csv	A	90106	90106	1	T -> A	499	SNP (transversion)	42.9%	0
c30-polc2, 35%, cov 100, allmutations.csv	A	90113	90113	1	T -> A	514	SNP (transversion)	40.7%	0
c30-polc2, 35%, cov 100, allmutations.csv	A	92008	92008	1	T -> A	370	SNP (transversion)	40.0%	0
c30-polc2, 35%, cov 100, allmutations.csv	A	92012	92012	1	T -> A	387	SNP (transversion)	63.3%	0
c30-polc2, 35%, cov 100, allmutations.csv	A	92032	92032	1	T -> A	388	SNP (transversion)	73.7%	0
c30-polc2, 35%, cov 100, allmutations.csv	A	335224	335224	1	G -> A	505	SNP (transition)	100.0%	0
c30-polc2, 35%, cov 100, allmutations.csv	A	828580	828580	1	T -> A	592	SNP (transversion)	100.0%	0
c30-polc2, 35%, cov 100, allmutations.csv	A	828588	828588	1	G -> A	602	SNP (transition)	100.0%	0
c30-polc2, 35%, cov 100, allmutations.csv	A	1344134	1344134	1	G -> A	546	SNP (transition)	100.0%	0
c30-polc2, 35%, cov 100, allmutations.csv	A	1380859	1380858	0	(A)6 -> (A)7	588	Insertion (tandem repeat)	100.0%	0
c30-polc2, 35%, cov 100, allmutations.csv	A	1801047	1801047	1	G -> A	548	SNP (transition)	64.4%	0
c30-polc2, 35%, cov 100, allmutations.csv	A	2103366	2103366	1	G -> A	157	SNP (transition)	53.5%	3.1e-256
c30-polc2, 35%, cov 100, allmutations.csv	A	2103375	2103375	1	C -> A	171	SNP (transversion)	61.4%	0
c30-polc2, 35%, cov 100, allmutations.csv	A	2131405	2131405	1	T -> A	613	SNP (transversion)	100.0%	0
c30-polc2, 35%, cov 100, allmutations.csv	A	2342634	2342634	1	T -> A	669	SNP (transversion)	100.0%	0
c30-polc2, 35%, cov 100, allmutations.csv	AA	92005	92007	3	CTG -> AA	368 -> 379	Deletion	53.6% -> 56.2%	0
c30-polc2, 35%, cov 100, allmutations.csv	AA	2103368	2103369	2	TT -> AA	158	Substitution	54.4%	3.1e-263
c30-polc2, 35%, cov 100, allmutations.csv	ACC	2101840	2101842	3	TTT -> ACC	160 -> 177	Substitution	41.3% -> 48.6%	1.7e-181
c30-polc2, 35%, cov 100, allmutations.csv	AG	92003	92004	2	TT -> AG	385	Substitution	97.9%	0
c30-polc2, 35%, cov 100, allmutations.csv	AGATTGTCAACA	2103389	2103400	12	TACGATAATTTT -> AGATTGTCAACA	219 -> 236	Substitution	71.2% -> 75.2%	0
c30-polc2, 35%, cov 100, allmutations.csv	AGATTT	2271259	2271258	0	+AGATTT	544 -> 558	Insertion	98.3% -> 98.4%	0
c30-polc2, 35%, cov 100, allmutations.csv	AGGA	2271238	2271241	4	TCTT -> AGGA	574 -> 577	Substitution	99.1% -> 99.3%	0
c30-polc2, 35%, cov 100, allmutations.csv	AGGCAAAGTT	2101816	2101825	10	GATAGTGTCA -> AGGCAAAGTT	178 -> 207	Substitution	71.4% -> 89.7%	0
c30-polc2, 35%, cov 100, allmutations.csv	AT	2271267	2271268	2	TC -> AT	540	Substitution	100.0%	0
c30-polc2, 35%, cov 100, allmutations.csv	ATAGGC	2271252	2271257	6	TCTTAT -> ATAGGC	573 -> 639	Substitution	99.7%	0
c30-polc2, 35%, cov 100, allmutations.csv	ATCAA	2103360	2103364	5	TCTCT -> ATCAA	145 -> 169	Substitution	35.5% -> 50.3%	1.6e-172
c30-polc2, 35%, cov 100, allmutations.csv	C	90067	90067	1	T -> C	537	SNP (transition)	35.2%	0
c30-polc2, 35%, cov 100, allmutations.csv	C	92008	92008	1	T -> C	370	SNP (transition)	60.0%	0
c30-polc2, 35%, cov 100, allmutations.csv	C	421846	421846	1	G -> C	537	SNP (transversion)	99.8%	0
c30-polc2, 35%, cov 100, allmutations.csv	C	475877	475877	1	G -> C	598	SNP (transversion)	100.0%	0
c30-polc2, 35%, cov 100, allmutations.csv	C	655712	655712	1	G -> C	614	SNP (transversion)	99.8%	0
c30-polc2, 35%, cov 100, allmutations.csv	C	1197634	1197634	1	T -> C	543	SNP (transition)	99.4%	0
c30-polc2, 35%, cov 100, allmutations.csv	C	1474120	1474120	1	T -> C	563	SNP (transition)	100.0%	0
c30-polc2, 35%, cov 100, allmutations.csv	C	2101827	2101827	1	G -> C	203	SNP (transversion)	69.0%	0
c30-polc2, 35%, cov 100, allmutations.csv	CA	90103	90104	2	AT -> CA	505 -> 508	Substitution	42.5% -> 42.6%	0
c30-polc2, 35%, cov 100, allmutations.csv	CA	2103371	2103372	2	TT -> CA	168 -> 169	Substitution	58.9% -> 59.2%	5.7e-305
c30-polc2, 35%, cov 100, allmutations.csv	CAG	2101836	2101838	3	GGA -> CAG	182 -> 200	Substitution	52.2% -> 58.5%	9.4e-279
c30-polc2, 35%, cov 100, allmutations.csv	CC	2271245	2271246	2	TA -> CC	617 -> 621	Substitution	99.8%	0
c30-polc2, 35%, cov 100, allmutations.csv	CCA	90121	90123	3	AAT -> CCA	497 -> 508	Substitution	35.8% -> 37.6%	0
c30-polc2, 35%, cov 100, allmutations.csv	CCGT	2103384	2103387	4	AATC -> CCGT	210 -> 216	Substitution	70.0% -> 71.3%	0
c30-polc2, 35%, cov 100, allmutations.csv	G	90126	90126	1	A -> G	502	SNP (transition)	35.3%	0
c30-polc2, 35%, cov 100, allmutations.csv	G	91984	91984	1	A -> G	341	SNP (transition)	35.5%	0
c30-polc2, 35%, cov 100, allmutations.csv	G	91993	91993	1	T -> G	386	SNP (transversion)	46.9%	0
c30-polc2, 35%, cov 100, allmutations.csv	G	92002	92002	1	T -> G	389	SNP (transversion)	45.8%	0
c30-polc2, 35%, cov 100, allmutations.csv	G	92012	92012	1	T -> G	387	SNP (transversion)	36.4%	0
c30-polc2, 35%, cov 100, allmutations.csv	G	92015	92015	1	T -> G	387	SNP (transversion)	64.3%	0
c30-polc2, 35%, cov 100, allmutations.csv	G	92024	92024	1	T -> G	385	SNP (transversion)	69.1%	0
c30-polc2, 35%, cov 100, allmutations.csv	G	92033	92033	1	T -> G	388	SNP (transversion)	100.0%	0
c30-polc2, 35%, cov 100, allmutations.csv	G	110469	110469	1	C -> G	510	SNP (transversion)	99.8%	0
c30-polc2, 35%, cov 100, allmutations.csv	G	1655492	1655492	1	C -> G	607	SNP (transversion)	100.0%	0
c30-polc2, 35%, cov 100, allmutations.csv	G	1899014	1899014	1	C -> G	525	SNP (transversion)	98.9%	0
c30-polc2, 35%, cov 100, allmutations.csv	G	1974770	1974770	1	C -> G	500	SNP (transversion)	100.0%	0
c30-polc2, 35%, cov 100, allmutations.csv	G	2271243	2271243	1	T -> G	577	SNP (transversion)	99.3%	0
c30-polc2, 35%, cov 100, allmutations.csv	GA	90117	90118	2	AC -> GA	502 -> 503	Substitution	37.8%	0
c30-polc2, 35%, cov 100, allmutations.csv	GA	92013	92014	2	CT -> GA	386 -> 387	Substitution	35.8% -> 35.9%	0
c30-polc2, 35%, cov 100, allmutations.csv	GC	90099	90100	2	TG -> GC	529 -> 536	Substitution	43.5% -> 44.2%	0
c30-polc2, 35%, cov 100, allmutations.csv	GCT	92017	92019	3	CAA -> GCT	371 -> 381	Substitution	99.5%	0
c30-polc2, 35%, cov 100, allmutations.csv	GGTTAGTTGT	90089	90088	0	+GGTTAGTTGT	551	Insertion	43.7%	0
c30-polc2, 35%, cov 100, allmutations.csv	GT	2101846	2101847	2	AA -> GT	151 -> 152	Substitution	35.8% -> 37.5%	9.4e-142
c30-polc2, 35%, cov 100, allmutations.csv	GTAAAC	2101829	2101834	6	TACTGT -> GTAAAC	203 -> 210	Substitution	59.6% -> 66.7%	0
c30-polc2, 35%, cov 100, allmutations.csv	T	90094	90094	1	A -> T	548	SNP (transversion)	44.5%	0
c30-polc2, 35%, cov 100, allmutations.csv	T	92009	92009	1	C -> T	390	SNP (transition)	37.9%	0
c30-polc2, 35%, cov 100, allmutations.csv	T	92029	92029	1	A -> T	395	SNP (transversion)	70.4%	0
c30-polc2, 35%, cov 100, allmutations.csv	T	225748	225748	1	A -> T	660	SNP (transversion)	100.0%	0
c30-polc2, 35%, cov 100, allmutations.csv	T	341995	341995	1	C -> T	645	SNP (transition)	99.8%	0
c30-polc2, 35%, cov 100, allmutations.csv	T	675748	675748	1	C -> T	544	SNP (transition)	100.0%	0
c30-polc2, 35%, cov 100, allmutations.csv	T	828598	828598	1	A -> T	652	SNP (transversion)	100.0%	0
c30-polc2, 35%, cov 100, allmutations.csv	T	1371873	1371873	1	C -> T	592	SNP (transition)	100.0%	0
c30-polc2, 35%, cov 100, allmutations.csv	T	1381039	1381039	1	A -> T	564	SNP (transversion)	100.0%	0
c30-polc2, 35%, cov 100, allmutations.csv	T	1963781	1963781	1	A -> T	628	SNP (transversion)	99.4%	2.5e-178
c30-polc2, 35%, cov 100, allmutations.csv	T	2271249	2271249	1	C -> T	627	SNP (transition)	99.8%	0
c30-polc2, 35%, cov 100, allmutations.csv	T	2271261	2271261	1	C -> T	540	SNP (transition)	99.8%	0
c30-polc2, 35%, cov 100, allmutations.csv	TAC	2103377	2103379	3	CTT -> TAC	191 -> 192	Substitution	66.5% -> 66.7%	0
c30-polc2, 35%, cov 100, allmutations.csv	TGT	2271263	2271265	3	CCA -> TGT	539 -> 540	Substitution	99.3%	0
c30-polc2, 35%, cov 100, allmutations.csv	TTTAT	2103402	2103406	5	CACTA -> TTTAT	216 -> 235	Substitution	76.2% -> 84.3%	0
c30-polc2, 35%, cov 100, allmutations.csv	TTTATA	90070	90075	6	AGAGCG -> TTTATA	531 -> 540	Substitution	37.4% -> 38.9%	0
c30-polc2, 35%, cov 100, allmutations.csv	TTTT	2117451	2117450	0	(TT)8 -> (TT)10	586 -> 611	Insertion (tandem repeat)	90.2% -> 90.3%	0
c30-wt1, 35%, cov 100, allmutations.csv		1180981	1180981	1	-T	369	Deletion	39.6%	0
c30-wt1, 35%, cov 100, allmutations.csv		1326304	1326305	2	(TT)9 -> (TT)8	251	Deletion (tandem repeat)	97.2%	0
c30-wt1, 35%, cov 100, allmutations.csv	A	92008	92008	1	T -> A	236	SNP (transversion)	100.0%	0
c30-wt1, 35%, cov 100, allmutations.csv	A	92012	92012	1	T -> A	240	SNP (transversion)	52.1%	0
c30-wt1, 35%, cov 100, allmutations.csv	A	92013	92013	1	C -> A	238	SNP (transversion)	47.5%	0
c30-wt1, 35%, cov 100, allmutations.csv	A	92032	92032	1	T -> A	223	SNP (transversion)	100.0%	0
c30-wt1, 35%, cov 100, allmutations.csv	A	1344134	1344134	1	G -> A	408	SNP (transition)	92.9%	0
c30-wt1, 35%, cov 100, allmutations.csv	A	1380859	1380858	0	(A)6 -> (A)7	436	Insertion (tandem repeat)	99.8%	0
c30-wt1, 35%, cov 100, allmutations.csv	A	1511255	1511255	1	G -> A	350	SNP (transition)	42.3%	0
c30-wt1, 35%, cov 100, allmutations.csv	A	2101816	2101816	1	G -> A	102	SNP (transition)	100.0%	0
c30-wt1, 35%, cov 100, allmutations.csv	A	2342634	2342634	1	T -> A	361	SNP (transversion)	100.0%	0
c30-wt1, 35%, cov 100, allmutations.csv	AAAGTT	2101820	2101825	6	GTGTCA -> AAAGTT	103 -> 116	Substitution	79.6% -> 91.3%	5.8e-300
c30-wt1, 35%, cov 100, allmutations.csv	AGATTGTCAACA	2103389	2103400	12	TACGATAATTTT -> AGATTGTCAACA	126 -> 157	Substitution	73.8% -> 82.2%	3.7e-304
c30-wt1, 35%, cov 100, allmutations.csv	ATC	92025	92027	3	TAA -> ATC	235 -> 238	Substitution	35.0% -> 35.7%	3.7e-233
c30-wt1, 35%, cov 100, allmutations.csv	C	92010	92010	1	T -> C	240	SNP (transition)	49.6%	0
c30-wt1, 35%, cov 100, allmutations.csv	C	92016	92016	1	T -> C	220	SNP (transition)	40.5%	6.3e-257
c30-wt1, 35%, cov 100, allmutations.csv	C	92018	92018	1	A -> C	222	SNP (transversion)	59.9%	0
c30-wt1, 35%, cov 100, allmutations.csv	C	475877	475877	1	G -> C	398	SNP (transversion)	96.5%	0
c30-wt1, 35%, cov 100, allmutations.csv	C	1197634	1197634	1	T -> C	437	SNP (transition)	55.6%	0
c30-wt1, 35%, cov 100, allmutations.csv	C	1474120	1474120	1	T -> C	412	SNP (transition)	78.4%	0
c30-wt1, 35%, cov 100, allmutations.csv	C	2101827	2101827	1	G -> C	108	SNP (transversion)	76.9%	3.4e-274
c30-wt1, 35%, cov 100, allmutations.csv	C	2101836	2101836	1	G -> C	103	SNP (transversion)	55.3%	1.4e-169
c30-wt1, 35%, cov 100, allmutations.csv	CCA	92020	92022	3	TTT -> CCA	221 -> 233	Substitution	36.5% -> 39.4%	1.3e-240
c30-wt1, 35%, cov 100, allmutations.csv	CCGT	2103384	2103387	4	AATC -> CCGT	121 -> 128	Substitution	68.6% -> 72.4%	4.8e-242
c30-wt1, 35%, cov 100, allmutations.csv	G	92011	92011	1	C -> G	237	SNP (transversion)	48.5%	0
c30-wt1, 35%, cov 100, allmutations.csv	G	92012	92012	1	T -> G	240	SNP (transversion)	47.9%	0
c30-wt1, 35%, cov 100, allmutations.csv	G	92015	92015	1	T -> G	234	SNP (transversion)	100.0%	0
c30-wt1, 35%, cov 100, allmutations.csv	G	92017	92017	1	C -> G	221	SNP (transversion)	59.7%	0
c30-wt1, 35%, cov 100, allmutations.csv	G	92019	92019	1	A -> G	223	SNP (transition)	39.9%	2.9e-256
c30-wt1, 35%, cov 100, allmutations.csv	G	92024	92024	1	T -> G	236	SNP (transversion)	64.0%	0
c30-wt1, 35%, cov 100, allmutations.csv	G	92033	92033	1	T -> G	221	SNP (transversion)	70.6%	0
c30-wt1, 35%, cov 100, allmutations.csv	G	110469	110469	1	C -> G	372	SNP (transversion)	99.7%	0
c30-wt1, 35%, cov 100, allmutations.csv	G	1038000	1038000	1	C -> G	380	SNP (transversion)	41.8%	0
c30-wt1, 35%, cov 100, allmutations.csv	G	1655492	1655492	1	C -> G	437	SNP (transversion)	81.7%	0
c30-wt1, 35%, cov 100, allmutations.csv	G	1974770	1974770	1	C -> G	412	SNP (transversion)	100.0%	0
c30-wt1, 35%, cov 100, allmutations.csv	GA	92006	92007	2	TG -> GA	230 -> 237	Substitution	36.1% -> 38.0%	1.7e-234
c30-wt1, 35%, cov 100, allmutations.csv	GAG	92002	92004	3	TTT -> GAG	250 -> 253	Substitution	58.4% -> 58.9%	0
c30-wt1, 35%, cov 100, allmutations.csv	GTAAAC	2101829	2101834	6	TACTGT -> GTAAAC	100 -> 114	Substitution	56.6% -> 71.9%	2.5e-185
c30-wt1, 35%, cov 100, allmutations.csv	T	92009	92009	1	C -> T	236	SNP (transition)	51.3%	0
c30-wt1, 35%, cov 100, allmutations.csv	T	92011	92011	1	C -> T	237	SNP (transition)	51.5%	0
c30-wt1, 35%, cov 100, allmutations.csv	T	92017	92017	1	C -> T	221	SNP (transition)	40.3%	1.1e-256
c30-wt1, 35%, cov 100, allmutations.csv	T	92018	92018	1	A -> T	222	SNP (transversion)	40.1%	1.8e-256
c30-wt1, 35%, cov 100, allmutations.csv	T	92019	92019	1	A -> T	223	SNP (transversion)	60.1%	0
c30-wt1, 35%, cov 100, allmutations.csv	T	92029	92029	1	A -> T	229	SNP (transversion)	68.1%	0
c30-wt1, 35%, cov 100, allmutations.csv	T	225748	225748	1	A -> T	416	SNP (transversion)	99.8%	0
c30-wt1, 35%, cov 100, allmutations.csv	T	262575	262575	1	G -> T	398	SNP (transversion)	76.9%	0
c30-wt1, 35%, cov 100, allmutations.csv	T	341995	341995	1	C -> T	377	SNP (transition)	100.0%	0
c30-wt1, 35%, cov 100, allmutations.csv	T	391040	391040	1	G -> T	362	SNP (transversion)	44.8%	0
c30-wt1, 35%, cov 100, allmutations.csv	T	1105074	1105074	1	C -> T	394	SNP (transition)	46.4%	0
c30-wt1, 35%, cov 100, allmutations.csv	T	1381039	1381039	1	A -> T	445	SNP (transversion)	100.0%	0
c30-wt1, 35%, cov 100, allmutations.csv	T	1963781	1963781	1	A -> T	380	SNP (transversion)	99.5%	7.2e-109
c30-wt1, 35%, cov 100, allmutations.csv	TAC	2103377	2103379	3	CTT -> TAC	107 -> 109	Substitution	61.7% -> 63.3%	4.2e-214
c30-wt1, 35%, cov 100, allmutations.csv	TTT	2117451	2117450	0	(TTT)5 -> (TTT)6	385 -> 391	Insertion (tandem repeat)	99.2%	0
c30-wt1, 35%, cov 100, allmutations.csv	TTTAT	2103402	2103406	5	CACTA -> TTTAT	145 -> 158	Substitution	82.3% -> 89.7%	0
c30-wt1, 35%, cov 100, allmutations.csv	TTTATA	90070	90075	6	AGAGCG -> TTTATA	310 -> 345	Substitution	35.9% -> 41.3%	0
c30-wt2, 35%, cov 100, allmutations.csv		92011	92011	1	-C	393	Deletion	100.0%	0
c30-wt2, 35%, cov 100, allmutations.csv		1326304	1326305	2	(TT)9 -> (TT)8	407	Deletion (tandem repeat)	97.1%	0
c30-wt2, 35%, cov 100, allmutations.csv		2190980	2190980	1	(T)8 -> (T)7	592	Deletion (tandem repeat)	98.3%	0
c30-wt2, 35%, cov 100, allmutations.csv	A	90106	90106	1	T -> A	444	SNP (transversion)	51.4%	0
c30-wt2, 35%, cov 100, allmutations.csv	A	90113	90113	1	T -> A	451	SNP (transversion)	48.3%	0
c30-wt2, 35%, cov 100, allmutations.csv	A	92008	92008	1	T -> A	374	SNP (transversion)	38.0%	0
c30-wt2, 35%, cov 100, allmutations.csv	A	92012	92012	1	T -> A	401	SNP (transversion)	65.6%	0
c30-wt2, 35%, cov 100, allmutations.csv	A	92032	92032	1	T -> A	393	SNP (transversion)	76.3%	0
c30-wt2, 35%, cov 100, allmutations.csv	A	1070627	1070627	1	G -> A	305	SNP (transition)	35.7%	3.2e-296
c30-wt2, 35%, cov 100, allmutations.csv	A	1380859	1380858	0	(A)6 -> (A)7	450	Insertion (tandem repeat)	100.0%	0
c30-wt2, 35%, cov 100, allmutations.csv	A	2342634	2342634	1	T -> A	613	SNP (transversion)	100.0%	0
c30-wt2, 35%, cov 100, allmutations.csv	AA	92005	92007	3	CTG -> AA	369 -> 374	Deletion	52.0% -> 55.6%	0
c30-wt2, 35%, cov 100, allmutations.csv	ACC	2101840	2101842	3	TTT -> ACC	161 -> 168	Substitution	36.0% -> 40.5%	2e-152
c30-wt2, 35%, cov 100, allmutations.csv	AG	92003	92004	2	TT -> AG	368 -> 369	Substitution	96.2% -> 96.5%	0
c30-wt2, 35%, cov 100, allmutations.csv	AGATTGTCAACA	2103389	2103400	12	TACGATAATTTT -> AGATTGTCAACA	266 -> 282	Substitution	43.8% -> 48.4%	0
c30-wt2, 35%, cov 100, allmutations.csv	AGGCAAAGTT	2101816	2101825	10	GATAGTGTCA -> AGGCAAAGTT	175 -> 199	Substitution	61.8% -> 75.4%	0
c30-wt2, 35%, cov 100, allmutations.csv	AGTGTCAAG	1070651	1070659	9	TTAAAGGTC -> AGTGTCAAG	297 -> 310	Substitution	36.1% -> 40.3%	0
c30-wt2, 35%, cov 100, allmutations.csv	C	92008	92008	1	T -> C	374	SNP (transition)	62.0%	0
c30-wt2, 35%, cov 100, allmutations.csv	C	475877	475877	1	G -> C	609	SNP (transversion)	99.8%	0
c30-wt2, 35%, cov 100, allmutations.csv	C	707158	707158	1	T -> C	488	SNP (transition)	100.0%	0
c30-wt2, 35%, cov 100, allmutations.csv	C	856892	856892	1	T -> C	412	SNP (transition)	36.4%	0
c30-wt2, 35%, cov 100, allmutations.csv	C	856958	856958	1	T -> C	524	SNP (transition)	60.3%	0
c30-wt2, 35%, cov 100, allmutations.csv	C	856983	856983	1	T -> C	519	SNP (transition)	69.4%	0
c30-wt2, 35%, cov 100, allmutations.csv	C	1070635	1070635	1	T -> C	323	SNP (transition)	36.2%	0
c30-wt2, 35%, cov 100, allmutations.csv	C	1197634	1197634	1	T -> C	564	SNP (transition)	99.8%	0
c30-wt2, 35%, cov 100, allmutations.csv	C	2101827	2101827	1	G -> C	205	SNP (transversion)	58.5%	0
c30-wt2, 35%, cov 100, allmutations.csv	CA	90103	90104	2	AT -> CA	451 -> 459	Substitution	49.9%	0
c30-wt2, 35%, cov 100, allmutations.csv	CAG	2101836	2101838	3	GGA -> CAG	172 -> 188	Substitution	42.4% -> 48.4%	1.6e-205
c30-wt2, 35%, cov 100, allmutations.csv	CCA	90121	90123	3	AAT -> CCA	429 -> 442	Substitution	43.4% -> 45.5%	0
c30-wt2, 35%, cov 100, allmutations.csv	CCGT	2103384	2103387	4	AATC -> CCGT	263 -> 271	Substitution	40.3% -> 42.8%	1.2e-305
c30-wt2, 35%, cov 100, allmutations.csv	G	91984	91984	1	A -> G	313	SNP (transition)	37.4%	0
c30-wt2, 35%, cov 100, allmutations.csv	G	91993	91993	1	T -> G	350	SNP (transversion)	46.0%	0
c30-wt2, 35%, cov 100, allmutations.csv	G	92002	92002	1	T -> G	369	SNP (transversion)	43.9%	0
c30-wt2, 35%, cov 100, allmutations.csv	G	92015	92015	1	T -> G	401	SNP (transversion)	66.6%	0
c30-wt2, 35%, cov 100, allmutations.csv	G	92024	92024	1	T -> G	405	SNP (transversion)	71.4%	0
c30-wt2, 35%, cov 100, allmutations.csv	G	92033	92033	1	T -> G	394	SNP (transversion)	100.0%	0
c30-wt2, 35%, cov 100, allmutations.csv	G	110469	110469	1	C -> G	542	SNP (transversion)	100.0%	0
c30-wt2, 35%, cov 100, allmutations.csv	G	1070639	1070638	0	+G	318	Insertion	36.8%	0
c30-wt2, 35%, cov 100, allmutations.csv	G	1899014	1899014	1	C -> G	550	SNP (transversion)	98.2%	0
c30-wt2, 35%, cov 100, allmutations.csv	G	1974770	1974770	1	C -> G	599	SNP (transversion)	100.0%	0
c30-wt2, 35%, cov 100, allmutations.csv	GA	90117	90118	2	AC -> GA	442 -> 443	Substitution	46.4% -> 46.7%	0
c30-wt2, 35%, cov 100, allmutations.csv	GA	1070648	1070649	2	AT -> GA	299 -> 303	Substitution	40.9% -> 41.5%	0
c30-wt2, 35%, cov 100, allmutations.csv	GC	90099	90100	2	TG -> GC	476 -> 481	Substitution	48.9% -> 49.5%	0
c30-wt2, 35%, cov 100, allmutations.csv	GCT	92017	92019	3	CAA -> GCT	389 -> 405	Substitution	100.0%	0
c30-wt2, 35%, cov 100, allmutations.csv	GGTTAGTTGT	90089	90088	0	+GGTTAGTTGT	522	Insertion	46.9%	0
c30-wt2, 35%, cov 100, allmutations.csv	GT	90137	90138	2	AA -> GT	439	Substitution	36.0%	0
c30-wt2, 35%, cov 100, allmutations.csv	GTAAAC	2101829	2101834	6	TACTGT -> GTAAAC	195 -> 210	Substitution	50.3% -> 57.1%	4.4e-295
c30-wt2, 35%, cov 100, allmutations.csv	GTGAAAATC	90126	90134	9	AGAGGTGAA -> GTGAAAATC	428 -> 439	Substitution	37.1% -> 41.3%	0
c30-wt2, 35%, cov 100, allmutations.csv	T	90094	90094	1	A -> T	517	SNP (transversion)	48.2%	0
c30-wt2, 35%, cov 100, allmutations.csv	T	91981	91981	1	G -> T	318	SNP (transversion)	35.5%	2e-295
c30-wt2, 35%, cov 100, allmutations.csv	T	92009	92009	1	C -> T	394	SNP (transition)	36.0%	0
c30-wt2, 35%, cov 100, allmutations.csv	T	92029	92029	1	A -> T	404	SNP (transversion)	73.5%	0
c30-wt2, 35%, cov 100, allmutations.csv	T	225748	225748	1	A -> T	588	SNP (transversion)	100.0%	0
c30-wt2, 35%, cov 100, allmutations.csv	T	341995	341995	1	C -> T	606	SNP (transition)	99.8%	0
c30-wt2, 35%, cov 100, allmutations.csv	T	496494	496494	1	C -> T	602	SNP (transition)	100.0%	0
c30-wt2, 35%, cov 100, allmutations.csv	T	856934	856934	1	A -> T	482	SNP (transversion)	54.4%	0
c30-wt2, 35%, cov 100, allmutations.csv	T	1274867	1274867	1	C -> T	560	SNP (transition)	100.0%	0
c30-wt2, 35%, cov 100, allmutations.csv	T	1381039	1381039	1	A -> T	540	SNP (transversion)	100.0%	0
c30-wt2, 35%, cov 100, allmutations.csv	T	1963781	1963781	1	A -> T	611	SNP (transversion)	99.8%	3.1e-180
c30-wt2, 35%, cov 100, allmutations.csv	TAC	2103377	2103379	3	CTT -> TAC	247 -> 248	Substitution	36.0% -> 36.3%	2.1e-242
c30-wt2, 35%, cov 100, allmutations.csv	TGAT	90140	90143	4	ATGA -> TGAT	434 -> 443	Substitution	33.9% -> 35.5%	0
c30-wt2, 35%, cov 100, allmutations.csv	TTTAC	1070629	1070633	5	CAAGT -> TTTAC	304 -> 306	Substitution	35.4% -> 36.9%	1.1e-299
c30-wt2, 35%, cov 100, allmutations.csv	TTTAT	2103402	2103406	5	CACTA -> TTTAT	239 -> 284	Substitution	50.7% -> 61.1%	0
c30-wt2, 35%, cov 100, allmutations.csv	TTTT	2117451	2117450	0	(TT)8 -> (TT)10	554 -> 581	Insertion (tandem repeat)	90.1% -> 90.5%	0
